# Supplementary material for: Impact of public-funded health insurances in India on health care utilisation and financial risk protection: a systematic review
Source: PubMed Central journal article supplement — BMJ Open. 2021 Dec 22;11(12):e050077. doi: 10.1136/bmjopen-2021-050077 (PMC8704974; doi:10.1136/bmjopen-2021-050077), 2021-12-22
Supplement: bmjopen-2021-050077.draft_revisions.pdf [file bmjopen-2021-050077.draft_revisions.pdf]

# BMJ Open

BMJ Open is committed to open peer review. As part of this commitment we make the peer review history of every article we publish publicly available.

When an article is published we post the peer reviewers' comments and the authors' responses online. We also post the versions of the paper that were used during peer review. These are the versions that the peer review comments apply to.

The versions of the paper that follow are the versions that were submitted during the peer review process. They are not the versions of record or the final published versions. They should not be cited or distributed as the published version of this manuscript.

BMJ Open is an open access journal and the full, final, typeset and author-corrected version of record of the manuscript is available on our site with no access controls, subscription charges or pay-per-view fees (<http://bmjopen.bmj.com>).

If you have any questions on BMJ Open's open peer review process please email [info.bmjopen@bmj.com](mailto:info.bmjopen@bmj.com)

# BMJ Open

## Impact of public funded health insurances in India on health care utilization and financial risk protection: a systematic review

|                               |                                                                                                                                                                                                                                                                                                                                                                                                                                                                                                                                                                                                                                                                                                                                           |
|-------------------------------|-------------------------------------------------------------------------------------------------------------------------------------------------------------------------------------------------------------------------------------------------------------------------------------------------------------------------------------------------------------------------------------------------------------------------------------------------------------------------------------------------------------------------------------------------------------------------------------------------------------------------------------------------------------------------------------------------------------------------------------------|
| Journal:                      | <i>BMJ Open</i>                                                                                                                                                                                                                                                                                                                                                                                                                                                                                                                                                                                                                                                                                                                           |
| Manuscript ID                 | bmjopen-2021-050077                                                                                                                                                                                                                                                                                                                                                                                                                                                                                                                                                                                                                                                                                                                       |
| Article Type:                 | Original research                                                                                                                                                                                                                                                                                                                                                                                                                                                                                                                                                                                                                                                                                                                         |
| Date Submitted by the Author: | 19-Feb-2021                                                                                                                                                                                                                                                                                                                                                                                                                                                                                                                                                                                                                                                                                                                               |
| Complete List of Authors:     | B, Reshmi; Manipal Academy of Higher Education (MAHE), Health Information Management, Manipal College of Health Professionals<br>Unnikrishnan, B.; MAHE, Department of Community Medicine, Kasturba Medical College, Mangaluru<br>Rajwar, Eti; MAHE, PHESA, Department of Health informatics, Prasanna School of Public Health, Manipal Academy of Higher Education, Manipal<br>Parsekar, Shradha; MAHE, PHESA, Department of Health informatics, Prasanna School of Public Health, Manipal Academy of Higher Education, Manipal<br>Vijayamma, Ratheebhai; MAHE, Manipal Institute of Communication<br>VENKATESH, BHUMIKA; Manipal Academy of Higher Education, PHESA, PRASANNA SCHOOL OF PUBLIC HEALTH, Department of Health Informatics |
| Keywords:                     | Health policy < HEALTH SERVICES ADMINISTRATION & MANAGEMENT, Health informatics < BIOTECHNOLOGY & BIOINFORMATICS, Public health < INFECTIOUS DISEASES, Epidemiology < INFECTIOUS DISEASES, Quality in health care < HEALTH SERVICES ADMINISTRATION & MANAGEMENT, Organisation of health services < HEALTH SERVICES ADMINISTRATION & MANAGEMENT                                                                                                                                                                                                                                                                                                                                                                                            |
|                               |                                                                                                                                                                                                                                                                                                                                                                                                                                                                                                                                                                                                                                                                                                                                           |

SCHOLARONE™  
Manuscripts

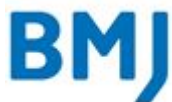

I, the Submitting Author has the right to grant and does grant on behalf of all authors of the Work (as defined in the below author licence), an exclusive licence and/or a non-exclusive licence for contributions from authors who are: i) UK Crown employees; ii) where BMJ has agreed a CC-BY licence shall apply, and/or iii) in accordance with the terms applicable for US Federal Government officers or employees acting as part of their official duties; on a worldwide, perpetual, irrevocable, royalty-free basis to BMJ Publishing Group Ltd ("BMJ") its licensees and where the relevant Journal is co-owned by BMJ to the co-owners of the Journal, to publish the Work in this journal and any other BMJ products and to exploit all rights, as set out in our [licence](#).

The Submitting Author accepts and understands that any supply made under these terms is made by BMJ to the Submitting Author unless you are acting as an employee on behalf of your employer or a postgraduate student of an affiliated institution which is paying any applicable article publishing charge ("APC") for Open Access articles. Where the Submitting Author wishes to make the Work available on an Open Access basis (and intends to pay the relevant APC), the terms of reuse of such Open Access shall be governed by a Creative Commons licence – details of these licences and which [Creative Commons](#) licence will apply to this Work are set out in our licence referred to above.

Other than as permitted in any relevant BMJ Author's Self Archiving Policies, I confirm this Work has not been accepted for publication elsewhere, is not being considered for publication elsewhere and does not duplicate material already published. I confirm all authors consent to publication of this Work and authorise the granting of this licence.

1  
2  
3 **Impact of public funded health insurances in India on health care utilization and financial**  
4  
5 **risk protection: a systematic review**  
6  
7

8 Reshmi B.<sup>1</sup>, Unnikrishnan B.<sup>2</sup>, Eti Rajwar<sup>3</sup>, Shradha S.

9  
10 Parsekar<sup>3</sup>, Ratheebhai Vijayamma<sup>4</sup>, Bhumika Tumkur Venkatesh<sup>3\*</sup>  
11

12 **Affiliations:**  
13

14  
15 <sup>1</sup> Health Information Management, Manipal College of Health Professionals, Manipal Academy  
16 of Higher Education (MAHE), Manipal, India  
17

18  
19 <sup>2</sup> Department of Community Medicine, Kasturba Medical College, MAHE, Mangaluru, India  
20

21  
22 <sup>3</sup> Public Health Evidence South Asia, Prasanna School of Public Health, MAHE, Manipal, India  
23

24  
25 <sup>4</sup> Manipal Institute of Communication, MAHE, Manipal, India  
26

27 **Email IDs:** Reshmi B: [reshmi.b@manipal.edu](mailto:reshmi.b@manipal.edu); Unnikrishnan B: [unnikrishnan.b@manipal.edu](mailto:unnikrishnan.b@manipal.edu);  
28

29 Eti Rajwar: [eti.rajwar@manipal.edu](mailto:eti.rajwar@manipal.edu); Shradha S Parsekar: [shradha.parsekar@manipal.edu](mailto:shradha.parsekar@manipal.edu);  
30

31 Ratheebhai V: [rathee63@gmail.com](mailto:rathee63@gmail.com); Bhumika TV: [bhumika.tv@manipal.edu](mailto:bhumika.tv@manipal.edu)  
32  
33

34  
35 **\*Corresponding author:**  
36

37 Room No. 35, Public Health Evidence South Asia, Prasanna School of Public Health, MAHE,  
38

39 Manipal 576104, Karnataka, India; Telephone: 08202923449; Email: [bhumika.tv@manipal.edu](mailto:bhumika.tv@manipal.edu)  
40  
41  
42  
43  
44  
45  
46  
47  
48  
49  
50  
51  
52  
53  
54  
55  
56  
57  
58  
59  
60

## Abstract

**Objective:** The Universal Health Coverage aims to address the challenges posed by the healthcare inequalities and inequities by increasing the accessibility and affordability of healthcare for the entire population. This review provides information related to impact of public funded health insurance (PFHI) on financial risk protection and utilization of healthcare.

**Design:** Systematic review

**Data Sources:** Medline (via PubMed, Web of Science), Scopus, Social Science Research Network and 3ie impact evaluation repository were searched from their inception until 15 July 2020, for English language publications.

**Eligibility criteria:** Studies giving information about the different PFHI in India, irrespective of population groups (above 18 years) were included. Cross-sectional studies with comparison, impact evaluations, difference-in-difference design based on before and after implementation of the scheme, pre-post, experimental trials, and quasi-randomized trials were eligible for inclusion.

**Data extraction and synthesis:** Data extraction was performed by three reviewers independently. Due to heterogeneity in population and study design statistical pooling was not possible, therefore narrative synthesis was performed.

**Outcomes:** Utilization of healthcare, willingness-to-pay (WTP), OOPE (including outpatient and inpatient), CHE, and impoverishment

**Results:** The impact of PFHI on financial risk protection reports no conclusive evidence to suggest that the schemes had any impact on the financial protection. The impact of PFHIs such as Rastriya Swasthy Bima Yojana, Vajpayee Arogyashree and PMJAY showed increased access and

1  
2  
3 utilization of healthcare services. There is lack of evidence to conclude on WTP an additional  
4 amount to the existing monthly financial contribution.  
5  
6

7  
8 **Conclusion:** The different central and state PFHIs increased the utilization of health care or health  
9 care services by the beneficiaries of the scheme but there was no conclusive evidence for reduction  
10 in financial risk protection of the beneficiaries.  
11  
12  
13

14  
15 **Registration:** Not registered  
16

17  
18 **Keywords:** Catastrophic Health Expenditure; Financial protection; India; Out-of-pocket health  
19 expenditure; Public funded health insurance; Willingness-to-pay.  
20  
21  
22

### 23 **Strengths and Limitations of this study**

- 24  
25  
26  
27 1) Inclusion of all kinds of empirical evidence to answer the research question about impact  
28 of PFHI schemes in India.  
29  
30  
31 2) Choice of quality appraisal tool, due to unavailability of other tools for this kind of study,  
32 was a limitation.  
33  
34  
35  
36  
37 3) Due to heterogeneity in data could not provide the pooled estimate via meta-analysis.  
38  
39 However results very explained via a narrative synthesis.  
40  
41  
42  
43  
44  
45  
46  
47  
48  
49  
50  
51  
52  
53  
54  
55  
56  
57  
58  
59  
60

## 1. Introduction

India has a complex and mixed healthcare framework with presence of parallel public and private healthcare systems.<sup>1 2</sup> There is a stark difference, in the government spending on both public and private healthcare.<sup>3</sup> Additionally, in India, healthcare access is driven by the difference in equalities or inequities. Health policies in India have been guided by the principle of equity with prioritizing the needs of the poor and underprivileged.<sup>4</sup> The inequality in health is a multidimensional concept that refers to the difference in health status of various population subgroups. Inequity in health is the inequalities that are judged as unfair as they are created because of socially derived processes. The different reasons for inequalities and inequity in healthcare are the (a) socio-economic inequalities due to difference in education, gender, awareness, income etc., (b) inequalities due to difference in public spending and difference in resource allocation, and (c) increase in private healthcare expenditure leading to high out-of-pocket (OOP) expenses that leads to high inequities in health financing.<sup>4</sup>

Out-of-pocket expenditure (OOPE) for health is one of the important factors while addressing the inequities in healthcare, and in India it is an important source of healthcare financing. It is estimated that in India around 71% of the healthcare spending is met by OOP expenditure. This not only is an immediate financial burden to the poor households but also pushes the households into a never-ending poverty trap.<sup>5</sup> Health related OOPE poses a threat to the principle of financial risk protection and adds to the unaffordability and inaccessibility of healthcare for the poor. High OOPE also leads to catastrophic health expenditure (CHE), which is the increase in healthcare payment by a household, beyond the threshold, where the threshold is defined as the household's income or capacity to pay. This is further divided into catastrophe 1 where healthcare

1  
2  
3 OOPE exceeds by 10% of the household's consumption expenditure, and catastrophe 2, if OOPE  
4 exceeds to more than 40% of the household's non-food expenditure. The increase in OOPE affects  
5 the rural population marginally more than the urban population and the effect of OOPE is more  
6 pronounced among the people living below the poverty line (BPL) than those above the poverty  
7 line (APL). As the BPL people are pushed more into poverty than the APL, due to the high OOPE,  
8 when measured via the increase in poverty head counts.<sup>5</sup>  
9

10  
11 To address the above-mentioned health inequities, over the years, government of India has rolled  
12 out different initiatives. The public healthcare system was revised and reframed as the National  
13 Rural Health Mission (NRHM) in 2005, later restructured as National Health Mission in 2014.<sup>5</sup>  
14

15  
16  
17  
18  
19  
20  
21  
22  
23  
24  
25  
26  
27  
28  
29  
30  
31  
32  
33  
34  
35  
36  
37  
38  
39  
40  
41  
42  
43  
44  
45  
46  
47  
48  
49  
50  
51  
52  
53  
54  
55  
56  
57  
58  
59  
60  

<sup>6</sup> Other initiatives like *Janani Suraksha Yojana* and the public funded health insurance (PFHI) schemes such as *Rashtriya Swasthya Beema Yojana* (RSBY) were also introduced to address the health inequalities, improve health outcomes and provide financial risk protection.<sup>6</sup> Many state sponsored health insurance (HI) schemes viz. the *Vajpayee Arogyashree Scheme* (VAS) by Karnataka, *Comprehensive Health Insurance Scheme* (CHIS) by Kerala, and *Chief Minister Health Insurance Scheme* (CMHIS) by Tamil Nadu; have been introduced for ensuring financial protection of the vulnerable population.

41  
42  
43  
44  
45  
46  
47  
48  
49  
50  
51  
52  
53  
54  
55  
56  
57  
58  
59  
60  

Challenges posed by the healthcare inequalities and inequities like OOPE can also be addressed via the Universal Health Coverage (UHC). The UHC, as defined by the World Health Organization (WHO), "means that all people and communities can use the promotive, preventive, curative, rehabilitative and palliative health services they need, of sufficient quality to be effective, while also ensuring that the use of these services does not expose the user to financial hardship". The UHC aims towards increasing the accessibility and affordability of healthcare for the entire



1  
2  
3 population. The definition of UHC is embodied in its three objectives i.e. equity, quality, and  
4  
5 financial protection.<sup>7</sup>  
6  
7

8  
9 The twelfth five-year plan of the government of India acknowledges the importance of UHC as it  
10  
11 introduces a work plan for achieving UHC for the 1.3 billion population of the country. The agenda  
12  
13 for this plan is based on the principle of providing affordable, accessible and good quality  
14  
15 healthcare with financial protection to the people of the country.<sup>8</sup> The provision of UHC has been  
16  
17 included in the National Health Policy of India (2017). To achieve the UHC, government of India  
18  
19 announced the '*Ayushman Bharat*' programme in 2018 with two initiatives i.e. (a) Health and  
20  
21 Wellness center, and (b) National health protection scheme- *Pradhan Mantri Jan Arogya*  
22  
23 *Yojana* (PMJAY) that is intended to cover around 500 million beneficiaries (from vulnerable  
24  
25 families) and is intended to cover up to Indian National Rupees (INR) 500,000 per family, per  
26  
27 year, for secondary and tertiary hospitalization.<sup>9</sup>  
28  
29  
30  
31

32  
33 The addition of PMJAY scheme to the various existing government (central and state)  
34  
35 funded HI schemes, aim to increase the UHC, by increasing the affordability and accessibility of  
36  
37 good quality healthcare. It is important to assess whether these schemes (including PMJAY) have  
38  
39 been proven to be effective in improving health outcomes and providing financial protection to the  
40  
41 vulnerable population. The previous systematic review<sup>10</sup> on assessing the effectiveness  
42  
43 of PFHI schemes in India was conducted before complete rolling out of the PMJAY and  
44  
45 therefore, did not include findings on the effectiveness of the scheme. The present review will  
46  
47 therefore aim to provide information related to effectiveness and impact of the central and state  
48  
49 funded HI schemes along with the PMJAY scheme. After the introduction of PMJAY, the change  
50  
51 in functioning of the other central and state funded HI is not very clear, therefore, this review will  
52  
53 also identify and map the currently operational PFHIs and if there has been any difference in the  
54  
55  
56  
57  
58  
59

1  
2  
3 guidelines of these insurance schemes after the advent of the PMJAY scheme. This review was  
4  
5 planned to answer the following research question:  
6

- 7  
8 a) What is the impact of PFHI schemes on access and utilization of healthcare, willingness-  
9  
10 to-pay and financial risk protection in India?  
11  
12

## 13 **2. Methods**

14  
15  
16 This systematic review follows the methodology by Cochrane handbook of interventions<sup>11</sup> and the  
17  
18 PRISMA checklist was used to report this review (*supplementary file 1*).<sup>12</sup>  
19  
20

### 21 2.1. Criteria for including studies in the review

- 22  
23 a. Population: Population group above 18 years of age, enrolled in a PFHI scheme in India.  
24  
25 b. Intervention: HI schemes funded by either central or state government, and that covers,  
26  
27 range of services such as hospitalization, out-patient charges, medicine costs,  
28  
29 treatment procedures etc. Different PFHI schemes in India, for example,  
30  
31 RSBY, VAS, CMHIS, and PMJAY were eligible to be included. Private or community-  
32  
33 based HIs were not eligible to be included. Mixture of HIs were excluded provided a study  
34  
35 carried out sub-group analysis for PFHIs.  
36  
37  
38 c. Comparison: comparison group comprises of people who do not receive  
39  
40 any PFHI services.  
41  
42  
43 d. Outcomes: This review includes the following outcomes; (a) Utilization of healthcare,  
44  
45 (b) WTP, (c) financial risk protection measured in terms of OOPE, CHE and  
46  
47 impoverishment.  
48  
49  
50 e. Study design: cross-sectional studies with comparison, impact evaluations, difference-in-  
51  
52 differences (DID) design based on before and after implementation of the scheme, pre-  
53  
54 post design, experimental trials, and quasi-randomized trials were eligible to be included.  
55  
56  
57  
58  
59  
60

## 2.2. Search methods for identification of studies

The following electronic databases were searched for the review, Medline (via PubMed, Web of Science), SCOPUS, Social Science Research Network and International Initiative for impact evaluation (3ie) repository. Databases were searched from their inception until 15 July 2020, however only English publications, published in the last 10 years were considered. References and forward citations of the included studies were scanned through for any additional eligible studies. Keywords were identified before the initiation of the search. The initial search was carried out in PubMed (*supplementary file 2*) and was replicated in other databases. Search was conducted by a designated information scientist.

## 2.3. Data collection

Result of search strategy was imported to Endnote X7 reference manager software. Duplicates were removed and the unique citations were exported to Microsoft Excel spreadsheet for screening.

2.3.1. Selection of studies: Unique citations were subjected to title and abstract screening independently by two reviewers. Eligible abstracts of all the relevant studies as per the inclusion criteria were included for full text screening (by BTV, ER and SSP) and relevant ones from these were included for analysis. Before initiating full text screening, we tried to retrieve the full text articles. For all the non-available articles, we tried to retrieve by contacting authors of the respective articles and the full texts that were not retrieved were excluded. Disagreements were resolved by discussion or by a third reviewer.

2.3.2. Data extraction: Data extraction was (done by ER, BTV, SSP) using a pre-designed data extraction form. Information on variables such as bibliographic details (author names, publication

1  
2  
3 year, journal name); study details (information about the objectives of the study and research  
4 question addressed); study setting (name of the state, rural/urban); participant characteristics (age,  
5 gender, socio-economic status, occupation); intervention details (name and type of HI, mode of  
6 delivery of the HI, incentives given, healthcare services covered, time duration of seeking HI, any  
7 additional HIs); comparison details; outcome details (information about changes in accessibility  
8 of healthcare, utilization of healthcare services, OOPE, WTP, health outcomes like morbidity and  
9 mortality, measurement of the outcomes, method used for measurement, time at which the  
10 outcome was measured); and study design details (type of study design and analysis) was  
11 extracted.  
12  
13  
14  
15  
16  
17  
18  
19  
20  
21  
22  
23  
24

25 After pilot testing of the data extraction form, it was revised according to the modifications  
26 suggested by the team. Disagreements among the reviewers, during data extraction were resolved  
27 by consensus, if still not resolved, third reviewer was approached for resolving the  
28 disagreements. Extracted data from all the included studies was cross-checked and independent  
29 extraction was done for one third randomly selected studies.  
30  
31  
32  
33  
34  
35  
36

#### 37 2.4. Methodological Quality

38 The methodological quality of the included studies was assessed using Effective Public Health  
39 Practice Project Quality Assessment Tool (EPHPP).<sup>13</sup> This tool assesses methodological quality  
40 of the quantitative studies based on questions under the following seven domains i.e., a) selection  
41 bias; b) study design; c) confounders; d) blinding; e) data collection method; f) withdrawals and  
42 dropouts; g) intervention integrity; h) analysis. Quality assessment using this scale, was performed  
43 independently by reviewers in groups of two. After discussion, global rating for the scale was  
44 followed and studies were marked as 1) methodologically strong if none of the domains had any  
45 weak rating; 2) moderate, if at least one domain was marked as weak; and 3) weak, if two or more  
46  
47  
48  
49  
50  
51  
52  
53  
54  
55  
56  
57  
58  
59  
60

1  
2  
3 domains were marked as weak. Quality assessment was performed using Microsoft excel  
4 spreadsheet.  
5  
6

## 7 8 9 2.5. Data analysis

10 Due to heterogeneity in data, narrative synthesis was performed to answer research question. The  
11 results are summarized based on outcomes and types of PFHIs. The effect measures of included  
12 studies such as mean difference or correlation coefficients with appropriate confidence interval  
13 and/or p values are reported.  
14  
15  
16  
17  
18

## 19 20 21 2.6. Patient and Public involvement

22 We did not involve public or patient during the process of this review.  
23  
24  
25

## 26 27 **3. Results**

28  
29 The literature search on electronic databases generated 555 citation yield, out of which 179 were  
30 duplicates. Additionally, 17 records were identified from forward and backward reference  
31 checking. After title and abstract screening of 393 citations, 157 were included for full text  
32 screening, of which finally 25 articles were included for data synthesis. Schematic representation  
33 of the selection process is shown in figure 1.  
34  
35  
36  
37  
38  
39

### 40 41 42 3.1. *Characteristics of included studies*

43 The summary of study characteristics is given in table 1 and the detailed characteristics of included  
44 studies is given in *the supplementary file 3*.  
45  
46  
47  
48

### 49 50 3.2. *Impact of PFHI on financial risk protection, utilization of healthcare and WTP*

51 Summary of the impact findings is given in table 2 and the detailed synthesis is provided in  
52 *supplementary file 4*.  
53  
54  
55

#### 56 57 3.2.1. Financial risk protection:

1  
2  
3 Around 21 studies measured financial risk protection, of which 17 were of strong  
4 methodologically quality,<sup>14-30</sup> three of moderate methodological quality<sup>31-33</sup> and one weak  
5 methodological quality.<sup>34</sup> Nine studies<sup>14 16 18 19 23 25 30 32 34</sup> reported the impact of RSBY alone on  
6 financial protection. Thirteen studies<sup>15 17 20-22 24 26-29 31-33</sup> provided information on the effect of  
7 different PFHI schemes (including state insurance schemes) on financial risk protection.  
8  
9

10  
11 Overall, there is inconclusive evidence on the impact of PFHIs schemes on financial risk protection  
12 i.e. OOPE, CHE and impoverishment.  
13  
14

### 15 16 17 18 19 20 21 3.2.2. Access and utilization of health services:

22 Overall, 16 studies assessed the impact of PFHI on access and utilization of health services (table  
23 2). The HI programs were RSBY,<sup>14 16 23 26 27 30 32 35</sup> VAS<sup>36 37</sup> RAS,<sup>17 27 32</sup> CHIS<sup>20 21 24 26 33</sup> and  
24 PMJAY.<sup>29</sup> Of the 16 studies, thirteen studies<sup>14 16 17 20 21 23 24 26 27 29 30 36 37</sup> were assessed to be of  
25 strong methodological quality, two<sup>32 33</sup> were assessed as of moderate quality and one<sup>35</sup> was rated  
26 as weak quality. The analysis that was carried out majorly to look at the impact were logistic  
27 regression, profit models and other types. The outcomes that were reported includes reporting of  
28 illness or morbidity, hospitalization rate, outpatient care and inpatient care utilization, duration  
29 of hospitalization and utilization of hospital services. Findings demonstrated increased access and  
30 utilization of healthcare (both in rural and urban areas) for RSBY, VAS and PMJAY health  
31 insurance programs. The uptake of inpatient services was relatively higher than utilization of  
32 outpatient services.  
33  
34  
35  
36  
37  
38  
39  
40  
41  
42  
43  
44  
45  
46  
47  
48  
49

### 50 3.2.3. Willingness-to-pay: 51 52 53 54 55 56 57 58 59 60

1  
2  
3 A high methodological study<sup>38</sup> reported WTP for the insurance scheme. The CGHS beneficiaries  
4 from low employment grade were more willing to pay an additional amount to the existing monthly  
5 financial contribution than the higher employment grade.  
6  
7  
8  
9

#### 10 11 **4. Discussion**

12  
13 This review identified and provided information on the impact of different PFHI schemes  
14 operational in India on healthcare utilization, WTP and financial risk protection of the  
15 beneficiaries. It was observed that although the utilization of healthcare services via inpatient and  
16 outpatient visits increased for insured beneficiaries, there was no effect of the PFHI schemes on  
17 financial risk protection of the insured households.  
18  
19  
20  
21  
22  
23  
24  
25

26 Our findings report that there is no conclusive evidence to suggest that RSBY reduced the OOPE  
27 and CHE or had an impact on the financial risk protection. For other PFHIs including the state  
28 sponsored PFHIs *viz.* RAS, VAS and CHIS, the findings suggest a mixed impact of these schemes  
29 on OOPE, CHE and impoverishment, leading to inconclusive evidence for financial risk  
30 protection. Our findings are similar to another systematic review,<sup>10</sup> which reported lack of  
31 substantial evidence for reduction in OOPE or improvement in financial risk protection by  
32 PFHI schemes in India.  
33  
34  
35  
36  
37  
38  
39  
40  
41  
42

43 One of the reasons for no substantial impact of RSBY on financial risk protection can be the limited  
44 coverage insurances e.g., INR 30,000 annually under RSBY. As the utilization of healthcare and  
45 hospitalization under RSBY has increased over the years<sup>10</sup> it is possible that beneficiaries would  
46 have been hospitalized for hospital services of more than INR 30,000, leading to  
47 additional OOP payment. Hospitalization for services not offered by the RSBY package and  
48 denial of hospitalization by the empaneled hospitals has also led to increase in OOPE.<sup>39</sup> Another  
49  
50  
51  
52  
53  
54  
55  
56  
57  
58  
59  
60

1  
2  
3 reason for the negligible impact of RSBY in reducing OOPE can be the operational or functional  
4 error of the scheme. An important component of the scheme are the insurance companies, which  
5 are responsible for enrolling beneficiaries, empaneling hospitals, processing claims and  
6 reimbursing money. Delayed reimbursement from the insurance companies, leads to hospitals  
7 asking beneficiaries to buy medicines and other consumables from outside, which results in high  
8 OOPE. Additionally, as there is no incentive for the insurance companies to keep a check on the  
9 OOPE payments, hospitals might charge patients or deny reimbursement of money on trivial  
10 grounds, leading to high OOPE.<sup>39</sup>

11  
12  
13  
14  
15  
16  
17  
18  
19  
20  
21  
22 The impact of PFHIs (other than RSBY) including the state sponsored schemes was reported to be  
23 mixed and inconclusive, similar to another systematic review that reported lack of substantial  
24 evidence of impact on OOPE for PFHI operational in low- and middle-income countries  
25 (LMICs).<sup>40</sup> Additionally, as the functioning of any PFHI scheme depends on the governance,  
26 different governance structures and demographic profiles of the states would have led to  
27 heterogeneity in results. Poor impact of different PFHIs on financial risk protection can be  
28 attributed to similar factors that affect RSBY i.e., low coverage or benefits offered by the  
29 schemes leading to OOPE and CHE even for insured beneficiaries and  
30 interference or reimbursement issues due to functioning of insurance companies or 'trusts'.  
31  
32  
33  
34  
35  
36  
37  
38  
39  
40  
41  
42  
43

44 Our systematic review is the first one that has focused on the impact of PMJAY. Our findings  
45 suggest, there is lack of evidence related to impact of PMJAY, as only one study  
46 reported poor impact of PMJAY on reduction in OOPE and financial risk protection. The reasons  
47 for poor impact can be similar as experienced by the earlier PFHIs schemes i.e., problem of 'double  
48 billing', private providers monopoly and administrative problems. As PMJAY is a relatively new  
49 scheme, more evidence is needed to conclude its impact. Additionally, as the only study included  
50  
51  
52  
53  
54  
55  
56  
57  
58  
59  
60



1  
2  
3 in the review was specifically for the state of Chhattisgarh, availability of evidence from other  
4 states is needed to summarize the impact of this scheme.  
5  
6  
7

8 In our review, most of the evidence comes from the studies that assessed impact of  
9 RSBY program in India and the data from the studies were analyzed from the National Sample  
10 Survey Office, the evidence from only two studies are results from quasi-randomized study  
11 design. Overall, there was increase in incidence of outpatient and inpatient visits and the utilization  
12 of medical services, the healthcare utilization rate differed between states. The utilization rate  
13 increased both among rural and urban areas for the RSBY and VAS. However, there was one  
14 study that assessed healthcare utilization for PMJAY and the results were insignificant for the  
15 same. The reasons for the results to be insignificant could be due to the lack of  
16 awareness regarding PMJAY, as it is a relatively new scheme. But, not justified to conclude based  
17 on a single study at the same time. It is important to look into various other aspects due to which  
18 the results of the PMJAY are insignificant in increasing healthcare utilization. The healthcare  
19 utilization rate was assessed in terms of reporting morbidity, hospitalization, utilization of inpatient  
20 and outpatient services.  
21  
22  
23  
24  
25  
26  
27  
28  
29  
30  
31  
32  
33  
34  
35  
36  
37  
38

39 Overall, majority of the evidence suggests that implementation of PFHI has increased  
40 hospitalization and the utilization of outpatient care. Our findings are consistent with  
41 other systematic reviews<sup>10 40</sup> i.e., PFHIs had a positive influence on utilization of healthcare and  
42 hospitalization in India and other LMICs. Although there is substantial evidence on the impact  
43 of PFHI on healthcare utilization, more rigorous evaluation studies are required to evaluate the  
44 impact of health insurance schemes and especially the newly launched PMJAY.  
45  
46  
47  
48  
49  
50  
51  
52  
53  
54  
55  
56  
57  
58  
59  
60

1  
2  
3 The findings for Willingness to Pay (WTP) is inconclusive, although the participants were willing  
4 to pay more, because the evidence is generated from a single study and the focus of the insurance  
5 was limited.  
6  
7  
8  
9

10  
11 *Strengths and limitations:*  
12

13 Our review is the first comprehensive review, which has summarized the impact of PFHI schemes  
14 in India, including the new scheme of PMJAY under the Ayushman Bharat, on utilization of  
15 healthcare and financial risk protection. One of the limitations of the review is the choice of quality  
16 assessment tool used for critical appraisal of included studies due to absence of any other valid  
17 tool for secondary data analysis. Responses to some of the questions and individual domain ratings  
18 for the EPHPP tool were subjective, although we had a substantial discussion between the authors  
19 before finalizing the rating. Secondly, the tool is used to assess quality of all the quantitative  
20 studies, which makes it very vague. Due to heterogeneity in methods, population and types of  
21 insurances, we could not perform meta-analysis.  
22  
23  
24  
25  
26  
27  
28  
29  
30  
31  
32  
33

34  
35 *Implications of practice and research:*  
36

37 Our systematic review has vast policy and practice implications. Since UHC is one of  
38 the important components to achieve the sustainable development goal, the role of  
39 PFHI becomes even more important in providing equitable and affordable healthcare access  
40 to everyone. Financial risk protection is one of the key components of any PFHI scheme that  
41 ensures affordable healthcare for everyone. Poor impact of PFHIs on financial risk protection  
42 also indicates failure of the PFHI schemes. More research on PFHIs especially PMJAY and its  
43 effect on financial risk protection and healthcare utilization is needed as this scheme is an  
44 important component of the Ayushman Bharat scheme under the UHC. Similarly, future studies  
45 can consider studying the effect of some of the state funded insurances such as  
46  
47  
48  
49  
50  
51  
52  
53  
54  
55  
56  
57  
58  
59  
60

1  
2  
3 by the government of Goa and West Bengal, which also includes APL households, for  
4  
5 which currently there is no evidence.  
6  
7

8 State and central governments could consider including APL households especially middle-  
9  
10 income group under the purview of PMJAY. There should be mechanisms to check corruption in  
11  
12 the process of PFHI enrolment and focus could be provided to ease out the administrative  
13  
14 difficulties faced by people at the time of claiming the insurance. Future research should be  
15  
16 directed towards the reasons for the failure of different PFHIs in  
17  
18 improving financial risk protection of the beneficiaries and demand- and supply-side barriers to  
19  
20 implementation and uptake of PFHI, by conducting rigorous qualitative research and process  
21  
22 evaluations. Research reporting reasons for failure of the PFHIs, in improving financial  
23  
24 protection, will help in revising and modifying the functioning and implementation of the PFHI  
25  
26 schemes for benefit of the consumers.  
27  
28  
29  
30  
31

### 32 **5. Conclusion**

33  
34 PFHI schemes *viz.* RSBY, VAS, RAS, and CHIS have been operational in India since 2008. These  
35  
36 schemes have been impactful in increasing healthcare utilization in terms of outpatient and  
37  
38 inpatient care in both rural and urban areas. However, none of these schemes have been successful  
39  
40 in improving the financial protection of the beneficiaries. The new scheme of Pradhan Mantri Jan  
41  
42 Arogya Yojana or PMJAY has incorporated administrative and strategic changes, which were  
43  
44 based on the shortcomings of earlier PFHIs *viz.* provision of a 24 hours inquiry helpline and  
45  
46 increased coverage of healthcare services and benefit package. However, limited evidence  
47  
48 available on the impact of PMJAY suggests no improvement in healthcare utilization and financial  
49  
50 risk protection of the beneficiaries. Future research on the impact of PMJAY and reasons for  
51  
52 failure of other PFHIs on financial risk protection need to be explored.  
53  
54  
55  
56  
57  
58  
59  
60

**List of Abbreviations:**

APL: Above poverty line; ATT: Average Treatment of Treated; BPL: Below poverty line; CBHI: Community Based Health Insurance; CGHS: Central Government Health Scheme; CHE: Catastrophic Health Expenditure; CHIS: Comprehensive Health Insurance Scheme; CI: Confidence Interval; CMHIS: Chief Minister Health Insurance Scheme; DID: Difference-in-Differences; ECHS: Ex-servicemen Contributory Health Scheme; ESIS: Employee State Insurance Scheme; HI: Health Insurance; IV: Instrumental Variable; LMICs: Low- and middle-income countries; MD: Mean Difference; NRHM: National Rural Health Mission; NSSO: National Sample Survey Office; OLS: Ordinary Least Square; OOP: Out-of-pocket; OOPE: Out-of-pocket health expenditure; OR: Odds Ratio; PFHI: Public Funded Health Insurance; PMJAY: Pradhan Mantri Jan Arogya Yojana; PSM: Propensity Score Matching; RAS: Rajiv Arogya Shree; RSBY: Rashtriya Swasthya Beema Yojana; SMD: Standard Mean Difference; UHC: Universal Health Coverage; UP: Uttar Pradesh; VAS: Vajpayee Arogyashree Scheme; WHO: World Health Organization

**Funding:** This work was supported by PHRI-RESEARCH grant awarded by Public Health Foundation of India, with the financial support of Department of Science and Technology. Funder did not have any role in data acquisition, writing and finalizing the report. Grant number is not applicable for this funding.

**Acknowledgement:** We would like to acknowledge the technical support provided by Public Health Evidence South Asia (PHESA), Prasanna School of Public Health (PSPH), Manipal Academy of Higher Education (MAHE), Manipal. We would like to thank Dr. Jisha B Krishnan, Research Assistant, PHESA, PSPH, MAHE, Manipal for supporting us in the title/abstract

1  
2  
3 screening and quality assessment of the included studies and Dr. Vijay Shree Dhyani, Research  
4 Assistant, PHESA, PSPH, MAHE, Manipal, for supporting us in title abstract screening.  
5  
6  
7

8  
9 **Conflict of interest:** None declared  
10

11  
12 **Author contribution:** RB is the guarantor of the review. BTV, ER, RB and SSP conceptualized  
13 the topic. RV developed search strategy and conducted the search. SSP carried out title/abstract  
14 screening and BTV, ER, SSP carried out full text screening. BTV, ER and SSP extracted first  
15 round of data extraction, analyzed and synthesized the data for the review. Extracted data from all  
16 the included studies was cross-checked and independent extraction was done for one third  
17 randomly selected studies by BTV, ER, SSP. Quality assessment was performed by BTV, ER,  
18 SSP. BTV, ER, SSP drafted the first version of report, which was further edited by RB, BTV, ER,  
19 RV, UB and SSP. All the authors read, provided feedback and approved the final report.  
20  
21  
22  
23  
24  
25  
26  
27  
28  
29  
30

### 31 **Information about supplementary files**

32  
33  
34 Supplementary file 1: PRISMA checklist (Microsoft word or doc.)  
35

36 This file consists of information about the research based on PRSIMA checklist 2009.  
37

38 **Supplementary file 2:** Search Strategy (Microsoft word or doc.)  
39

40 This file gives information about the search strategy used for searching for primary studies  
41 included in the systematic review.  
42  
43  
44

45 **Supplementary file 3:** Characteristics of included studies (Microsoft word or doc)  
46

47 This file provides information about the population, intervention (name and type of health  
48 insurance), outcome and study designs used in the included primary studies.  
49  
50  
51

52 **Supplementary file 4:** Detailed synthesis of the results (Microsoft word or doc)  
53

54 This file provided detailed synthesis of the study findings.  
55  
56  
57  
58  
59  
60

**Image 1: PRISMA FLOW DIAGRAM****References:**

1. Chokshi M, Patil B, Khanna R, et al. Health systems in India. *Journal of Perinatology* 2016;36(3):S9-S12. doi: 10.1038/jp.2016.184
2. Rao NV, Downey L, Jain N, et al. Priority-setting, the Indian way. *J Glob Health* 2018;8(2):020311-11. doi: 10.7189/jogh.08.020311
3. Sengupta A, Nundy S. The private health sector in India. *BMJ* 2005;331(7526):1157-58. doi: 10.1136/bmj.331.7526.1157
4. Balarajan Y, Selvaraj S, Subramanian SV. Health care and equity in India. *The Lancet* 2011;377(9764):505-15. doi: [https://doi.org/10.1016/S0140-6736\(10\)61894-6](https://doi.org/10.1016/S0140-6736(10)61894-6)
5. Hooda SK. Out-of-pocket Payments for Healthcare in India: Who Have Affected the Most and Why? *Journal of Health Management* 2017;19(1):1-15. doi: 10.1177/0972063416682535
6. Zodpey S, Farooqui H. Universal health coverage in India: Progress achieved & the way forward. *Indian Journal of Medical Research* 2018;147(4):327-29. doi: 10.4103/ijmr.IJMR\_616\_18
7. Universal Health Coverage Geneva: The World Health Organization; 2020 [cited 2020]. Available from: [http://www.who.int/health\\_financing/universal\\_coverage\\_definition/en/](http://www.who.int/health_financing/universal_coverage_definition/en/) accessed June 23 2020.
8. Twelfth Five Year Plan (2012–2017). New Delhi, India: Planning Commission, Government of India, 2013.
9. Ayushman Bharat for a new India -2022, announced: Press Information Bureau Government of India Ministry of Finance, 2018.

- 1  
2  
3 10. Prinja S, Chauhan AS, Karan A, et al. Impact of Publicly Financed Health Insurance Schemes  
4  
5 on Healthcare Utilization and Financial Risk Protection in India: A Systematic Review.  
6  
7 *PLOS ONE* 2017;12(2):e0170996. doi: 10.1371/journal.pone.0170996  
8  
9
- 10 11. Cochrane Handbook for Systematic Reviews of Interventions version 6.1 (updated September  
11  
12 2020). In: Higgins JPT TJ, Chandler J, Cumpston M, Li T, Page MJ, Welch VA ed.:  
13  
14 Cochrane, 2020.  
15
- 16 12. Moher D, Liberati A, Tetzlaff J, et al. Preferred reporting items for systematic reviews and  
17  
18 meta-analyses: the PRISMA statement. *BMJ* 2009;339:b2535. doi: 10.1136/bmj.b2535  
19  
20
- 21 13. Effective Public Health Practice Project- Quality Assessment tool for Quantitative Studies  
22  
23 Ontario: MacMaster University; [Available from: <https://merst.ca/ephpp/2020>.  
24  
25
- 26 14. Azam M. Does Social Health Insurance Reduce Financial Burden? Panel Data Evidence from  
27  
28 India. *World Development* 2018;102:1-17. doi:  
29  
30 <https://doi.org/10.1016/j.worlddev.2017.09.007>.  
31  
32
- 33 15. Fan VY, Karan A, Mahal A. State health insurance and out-of-pocket health expenditures in  
34  
35 Andhra Pradesh, India. *International journal of health care finance and economics*  
36  
37 2012;12(3):189-215. doi: 10.1007/s10754-012-9110-5 [published Online First:  
38  
39 2012/07/07]  
40  
41
- 42 16. Ghosh S, and, Gupta ND. Targeting and effects of Rashtriya Swasthya Bima Yojana on access  
43  
44 to care and financial protection. *Economic and political weekly* 2017;52(4):61-70.  
45  
46
- 47 17. Garg S, Chowdhury S, Sundararaman T. Utilisation and financial protection for hospital care  
48  
49 under publicly funded health insurance in three states in Southern India. *BMC Health*  
50  
51 *Services Research* 2019;19(1):1004. doi: 10.1186/s12913-019-4849-8  
52  
53
- 54 18. Johnson D, Krishnaswamy K. The impact of RSBY on hospital utilization and out-of-pocket  
55  
56 health expenditure. Washington, DC: World Bank, 2012.  
57  
58

- 1  
2  
3  
4  
5  
6  
7  
8  
9  
10  
11  
12  
13  
14  
15  
16  
17  
18  
19  
20  
21  
22  
23  
24  
25  
26  
27  
28  
29  
30  
31  
32  
33  
34  
35  
36  
37  
38  
39  
40  
41  
42  
43  
44  
45  
46  
47  
48  
49  
50  
51  
52  
53  
54  
55  
56  
57  
58  
59  
60
19. Karan A, Yip W, Mahal A. Extending health insurance to the poor in India: An impact evaluation of Rashtriya Swasthya Bima Yojana on out of pocket spending for healthcare. *Social Science & Medicine* 2017;181:83-92. doi: <https://doi.org/10.1016/j.soescimed.2017.03.053>
  20. Mahapatro SR, Singh P, Singh Y. How effective health insurance schemes are in tackling economic burden of healthcare in India. *Clinical Epidemiology and Global Health* 2018;6(2):75-82. doi: <https://doi.org/10.1016/j.cegh.2017.04.002>
  21. Ranjan A, Dixit P, Mukhopadhyay I, et al. Effectiveness of government strategies for financial protection against costs of hospitalization Care in India. *BMC Public Health* 2018;18(1):501. doi: 10.1186/s12889-018-5431-8
  22. Ravi S, Bergkvist S. Are Publicly Financed Health Insurance Schemes Working in India? *India Policy Forum, National Council of Applied Economic Research* 2015;11(1):158-92.
  23. Raza W, van de Poel E, Panda P. Analyses of enrolment, dropout and effectiveness of RSBY in northern rural India. MPRA Paper 70081. Germany: University Library of Munich, 2016.
  24. Sriram S, Khan MM. Effect of health insurance program for the poor on out-of-pocket inpatient care cost in India: evidence from a nationally representative cross-sectional survey. *BMC Health Services Research* 2020;20(1):839. doi: 10.1186/s12913-020-05692-7
  25. Sinha RK. Impact of Publicly Financed Health Insurance Scheme (Rashtriya Swasthya Bima Yojana) from Equity and Efficiency Perspectives. *Vikalpa* 2018;43(4):191-206. doi: 10.1177/0256090918804390
  26. Nandi S, Schneider H, Dixit P. Hospital utilization and out of pocket expenditure in public and private sectors under the universal government health insurance scheme in Chhattisgarh



- 1  
2  
3 State, India: Lessons for universal health coverage. *PLOS ONE* 2017;12(11):e0187904.  
4  
5 doi: 10.1371/journal.pone.0187904  
6  
7
- 8 27. Rao M, Katyal A, Singh PV, et al. Changes in addressing inequalities in access to hospital care  
9  
10 in Andhra Pradesh and Maharashtra states of India: a difference-in-differences study using  
11  
12 repeated cross-sectional surveys. *BMJ Open* 2014;4(6):e004471. doi: 10.1136/bmjopen-  
13  
14 2013-004471  
15  
16
- 17 28. Selvaraj S, Karan AK. Why Publicly-Financed Health Insurance Schemes Are Ineffective in  
18  
19 Providing Financial Risk Protection. *Economic and Political Weekly* 2012;47(11):60-68.  
20  
21
- 22 29. Garg S, Bebartta KK, Tripathi N. Performance of India's national publicly funded health  
23  
24 insurance scheme, Pradhan Mantri Jan Arogya Yojana (PMJAY), in improving access  
25  
26 and financial protection for hospital care: findings from household surveys in Chhattisgarh  
27  
28 state. *BMC Public Health* 2020;20(1):949. doi: 10.1186/s12889-020-09107-4  
29  
30
- 31 30. Sabharwal NS, Mishra, V. K., Naik, A. K., Holmes, R., & Hagen-Zanker, J. How does social  
32  
33 protection contribute to social inclusion in India? Evidence from the National Health  
34  
35 Insurance Programme (RSBY) in Maharashtra and Uttar Pradesh: Overseas Development  
36  
37 Institute, 2014.  
38  
39
- 40 31. Barnes K, Mukherji A, Mullen P, et al. Financial risk protection from social health insurance.  
41  
42 *Journal of Health Economics* 2017;55:14-29. doi:  
43  
44 <https://doi.org/10.1016/j.jhealeco.2017.06.002>  
45  
46
- 47 32. Katyal A, Singh PV, Bergkvist S, et al. Private sector participation in delivering tertiary health  
48  
49 care: a dichotomy of access and affordability across two Indian states. *Health policy and*  
50  
51 *planning* 2015;30 Suppl 1(Suppl 1):i23-31. doi: 10.1093/heapol/czu061 [published Online  
52  
53 First: 2015/03/12]  
54  
55  
56  
57  
58  
59  
60

- 1  
2  
3 33. Philip NE, Kannan S, Sarma SP. Utilization of Comprehensive Health Insurance Scheme,  
4 Kerala: A Comparative Study of Insured and Uninsured Below-Poverty-Line Households.  
5  
6 *Asia-Pacific journal of public health* 2016;28(1 Suppl):77s-85s. doi:  
7  
8 10.1177/1010539515602306 [published Online First: 2015/09/01]  
9  
10  
11  
12 34. Khetrupal S, Acharya A. Expanding healthcare coverage: An experience from <i>Rashtriya  
13 Swasthya Bima Yojna</i>. *Indian Journal of Medical Research* 2019;149(3):369-75. doi:  
14  
15 10.4103/ijmr.IJMR\_1419\_18  
16  
17  
18  
19 35. Dror DM, Vellakkal S. Is RSBY India's platform to implementing universal hospital insurance?  
20  
21 *The Indian journal of medical research* 2012;135(1):56-63. doi: 10.4103/0971-5916.93425  
22  
23 [published Online First: 2012/03/03]  
24  
25  
26 36. Sood N, Bendavid E, Mukherji A, et al. Government health insurance for people below poverty  
27 line in India: quasi-experimental evaluation of insurance and health outcomes. *BMJ* :  
28  
29 *British Medical Journal* 2014;349:g5114. doi: 10.1136/bmj.g5114  
30  
31  
32  
33 37. Sood N, Wagner Z. Impact of health insurance for tertiary care on postoperative outcomes and  
34 seeking care for symptoms: quasi-experimental evidence from Karnataka, India. *BMJ*  
35  
36 *Open* 2016;6(1):e010512. doi: 10.1136/bmjopen-2015-010512  
37  
38  
39  
40 38. Vellakkal S, Juyal Sa, Mehdi A. Healthcare Delivery and Stakeholder's Satisfaction Under  
41 Social Health Insurance Schemes in India: An Evaluation of Central Government Health  
42 Scheme (CGHS) and Exservicemen Contributory Health Scheme (ECHS): SSRN, 2012.  
43  
44  
45  
46  
47 39. Devadasan N, Seshadri T, Trivedi M, et al. Promoting universal financial protection: evidence  
48 from the Rashtriya Swasthya Bima Yojana (RSBY) in Gujarat, India. *Health research*  
49  
50 *policy and systems* 2013;11:29. doi: 10.1186/1478-4505-11-29 [published Online First:  
51  
52 2013/08/22]  
53  
54  
55  
56  
57  
58  
59  
60

1  
2  
3  
4  
5  
6  
7  
8  
9  
10  
11  
12  
13  
14  
15  
16  
17  
18  
19  
20  
21  
22  
23  
24  
25  
26  
27  
28  
29  
30  
31  
32  
33  
34  
35  
36  
37  
38  
39  
40  
41  
42  
43  
44  
45  
46  
47  
48  
49  
50  
51  
52  
53  
54  
55  
56  
57  
58  
59  
60

40. Acharya A, Vellakkal S, Taylor F, et al. Impact of national health insurance for the poor and the informal sector in low- and middle-income countries: a systematic review. London: University of London, Institute of Education, Social Science Research Unit., 2012.

For peer review only

**Table 1: Summary characteristics of included studies**

| Sl. No. | Study characteristic  | Summary                                                                                                                                                                                                                                                                                                                                                                                                                                                                                                                                                                                                                                                                                                |
|---------|-----------------------|--------------------------------------------------------------------------------------------------------------------------------------------------------------------------------------------------------------------------------------------------------------------------------------------------------------------------------------------------------------------------------------------------------------------------------------------------------------------------------------------------------------------------------------------------------------------------------------------------------------------------------------------------------------------------------------------------------|
| 1.      | Geographical location | <p>Out of the 25 included studies, 10 studies were conducted nationally,<sup>14 16 18-22 24 28 30</sup> twelve cities - Bhubaneswar, Thiruvananthapuram, Ahmedabad, Chandigarh, Lucknow, Hyderabad, Kolkata, Mumbai and Delhi.<sup>38</sup> Other studies were conducted in regional locations.</p> <p>Studies covering northern region of India were conducted in Uttar Pradesh (UP),<sup>23</sup> Studies covering southern region of India were undertaken in Karnataka,<sup>17 31 36 37</sup> Kerala<sup>33</sup> and Tamil Nadu.<sup>17</sup> Remaining studies were carried out in eastern region viz. Chhattisgarh,<sup>26 29</sup> and western region viz. Maharashtra.<sup>27 30 32</sup></p> |

|    |            |                                                                                                                                                                                                                                                                                                                                                                                                                                                                                                                                                                                                                                                                                                                                                                                                                                                                                               |
|----|------------|-----------------------------------------------------------------------------------------------------------------------------------------------------------------------------------------------------------------------------------------------------------------------------------------------------------------------------------------------------------------------------------------------------------------------------------------------------------------------------------------------------------------------------------------------------------------------------------------------------------------------------------------------------------------------------------------------------------------------------------------------------------------------------------------------------------------------------------------------------------------------------------------------|
| 2. | Population | <p>Population among the included studies differed in characteristics. General population studies.<sup>14-16 20 25-27 29 31</sup> Around seven studies comprised of below poverty line (BPL) mixed population from rural and urban households were considered in three studies.<sup>2</sup> of patients selected from RSBY empaneled hospitals and key stakeholders.<sup>34</sup> One study help group (SHG) members or head of the households.<sup>23</sup> One study comprised of socio excluded households focusing on Scheduled Castes (SC), Muslims and upper caste population comprised of a mix population of BPL and above poverty line (APL) households.<sup>36 37</sup> Central Government Health Scheme (CGHS) and Ex-servicemen Contributory Health Scheme (ECHS) principal beneficiaries, empaneled private healthcare providers and officials in Indian cities.<sup>38</sup></p> |
|----|------------|-----------------------------------------------------------------------------------------------------------------------------------------------------------------------------------------------------------------------------------------------------------------------------------------------------------------------------------------------------------------------------------------------------------------------------------------------------------------------------------------------------------------------------------------------------------------------------------------------------------------------------------------------------------------------------------------------------------------------------------------------------------------------------------------------------------------------------------------------------------------------------------------------|

|    |                   |                                                                                                                                                                                                                                                                                                                                                                                                                                                                                                                                                                                                                                                                                                                                                                      |
|----|-------------------|----------------------------------------------------------------------------------------------------------------------------------------------------------------------------------------------------------------------------------------------------------------------------------------------------------------------------------------------------------------------------------------------------------------------------------------------------------------------------------------------------------------------------------------------------------------------------------------------------------------------------------------------------------------------------------------------------------------------------------------------------------------------|
| 3. | Type of Insurance | <p>Central government funded health insurance (HI): About 14 studies were conducted on funded HI schemes i.e., RSBY.<sup>14 18 19 22-28 30 32 34 35</sup> One study was conducted on PMJAY conducted on CGHS.<sup>16 24 38</sup> Two studies were conducted on Employee State Insurance Corporation (ESIC) in Karnataka and Shree (RAS) in Andhra Pradesh.<sup>15 27 32</sup></p> <p>State government funded HI: Three studies each were conducted on VAS in Karnataka, Andhra Pradesh and Shree (RAS) in Andhra Pradesh.<sup>15 27 32</sup></p> <p>One study each reported on CHIS<sup>33</sup> (Philip, Kannan &amp; Sharma, 2016) and ECHS.<sup>38</sup></p> <p>Any government funded HI: Remaining other studies were generally all PFHI.<sup>17 20-22</sup></p> |
| 4. | Study design      | <p>Impact evaluation including quasi-randomized designs was used in eight studies.<sup>15 16 17 20-22 24 26-28 35</sup> Cross-sectional study design was used in five studies.<sup>23 25 31 33 38</sup> Secondary data analysis was performed in two studies.<sup>20-22 24 26-28 35</sup> Mixed method approach was used in one study.<sup>34</sup></p>                                                                                                                                                                                                                                                                                                                                                                                                              |

|    |                        |                                                                                                                                                                                                                                                                                                                                                                                                                                                                                                                                                                                                                                                                                                                                                                                                                                                                                                               |
|----|------------------------|---------------------------------------------------------------------------------------------------------------------------------------------------------------------------------------------------------------------------------------------------------------------------------------------------------------------------------------------------------------------------------------------------------------------------------------------------------------------------------------------------------------------------------------------------------------------------------------------------------------------------------------------------------------------------------------------------------------------------------------------------------------------------------------------------------------------------------------------------------------------------------------------------------------|
| 5. | Outcomes               | <p>a. Financial risk protection: The impact of RSBY on financial protection was reported<sup>25 30 32 34</sup>. The impact of different PFHI schemes (including state insurance schemes) were reported by thirteen studies.<sup>15 17 20-22 24 26-29 31-33</sup></p> <p>b. Access and utilization of healthcare: The impact of PFHI on healthcare utilization out of these eight studies assessed the impact of RSBY on healthcare utilization.<sup>14 16</sup> was assessed by single study.<sup>32</sup> Five studies assessed the impact of CHIS on utilization.<sup>33</sup> One study evaluated the impact of PMJAY on healthcare utilization.<sup>29</sup> Hospitalization studies with the implementation of RAS.<sup>17 27</sup> Two studies reported hospital utilization of VAS.<sup>36 37</sup></p> <p>c. Willingness to pay: WTP and reduction of financial burden was reported in one study.</p> |
| 6. | Methodological quality | Out of 25 studies, three were of moderate quality <sup>31-33</sup> , two weak methodological quality were of high quality.                                                                                                                                                                                                                                                                                                                                                                                                                                                                                                                                                                                                                                                                                                                                                                                    |

**Table 2: Impact of PFHI schemes on financial risk protection and healthcare utilization**

| <b>Financial Risk Protection</b> |                                                |                                              |                       |
|----------------------------------|------------------------------------------------|----------------------------------------------|-----------------------|
| <b>I Scheme</b>                  | <b>Outcome</b>                                 |                                              |                       |
|                                  | <b>Out of Pocket health Expenditure (OOPE)</b> | <b>Catastrophic Health Expenditure (CHE)</b> | <b>Impoverishment</b> |



|                                                                                                                                                                                                                                                                                                                                                                                                   |                                                                                                                                                                                                                                                                                                                                                                                                                                                                                                                                                                                                                                                                                                                                                                                                                                                                                                                                                                                                                                 |                                                                                                                                                                                                                                                                                                                                                                                                                                                                                                                                                                                                                                                                                                                                                                                                                                                                                                                          |                                                                                                                                                                                                                                                                                                                                                                                                                                                                                                                                                           |
|---------------------------------------------------------------------------------------------------------------------------------------------------------------------------------------------------------------------------------------------------------------------------------------------------------------------------------------------------------------------------------------------------|---------------------------------------------------------------------------------------------------------------------------------------------------------------------------------------------------------------------------------------------------------------------------------------------------------------------------------------------------------------------------------------------------------------------------------------------------------------------------------------------------------------------------------------------------------------------------------------------------------------------------------------------------------------------------------------------------------------------------------------------------------------------------------------------------------------------------------------------------------------------------------------------------------------------------------------------------------------------------------------------------------------------------------|--------------------------------------------------------------------------------------------------------------------------------------------------------------------------------------------------------------------------------------------------------------------------------------------------------------------------------------------------------------------------------------------------------------------------------------------------------------------------------------------------------------------------------------------------------------------------------------------------------------------------------------------------------------------------------------------------------------------------------------------------------------------------------------------------------------------------------------------------------------------------------------------------------------------------|-----------------------------------------------------------------------------------------------------------------------------------------------------------------------------------------------------------------------------------------------------------------------------------------------------------------------------------------------------------------------------------------------------------------------------------------------------------------------------------------------------------------------------------------------------------|
| <p>1<br/>2<br/>3<br/>4<br/>5<br/>6<br/>7<br/>8<br/>9<br/>10<br/>11<br/>12<br/>13<br/>14<br/>15<br/>16<br/>17<br/>18<br/>19<br/>20<br/>21<br/>22<br/>23<br/>24<br/>25<br/>26<br/>27<br/>28<br/>29<br/>30<br/>31<br/>32<br/>33<br/>34<br/>35<br/>36<br/>37<br/>38<br/>39<br/>40<br/>41<br/>42<br/>43<br/>44<br/>45<br/>46<br/>47<br/>48<br/>49<br/>50<br/>51<br/>52<br/>53<br/>54<br/>55<br/>56</p> | <p>a. <b>Inpatient OOPE:</b></p> <p>RSBY influenced reduction in inpatient OOPE. The evidence is generated from three high methodological studies.<sup>14 18 30</sup></p> <p>The per-capita inpatient expenditure for RSBY treated households, decreased in both rural and urban areas.<sup>14</sup> The impact of RSBY on inpatient expenditure was reduced for unmatched and matched samples, when RSBY was implemented for a minimum of two months duration. After removing Uttar Pradesh (UP) and Haryana from the analysis, the triple difference findings (i.e. with a second control of non-BPL households) showed a reduction in inpatient expenditure but the double difference analysis showed an increase in inpatient expenditure due to RSBY. However, none of these findings were statistically significant.<sup>18</sup> Both the studies included National Sample Survey Office (NSSO) data from Andhra Pradesh, Karnataka and Tamil Nadu, and used matching and DID methodology for analysis. Sabharwal et</p> | <p>Four studies<sup>14 16 19 25</sup> provided information on the effect of RSBY on CHE, the RSBY households were less likely to incur CHE for outpatient care, inpatient care and overall CHE. It was observed that beneficiaries of the scheme reported a reduction in CHE, however, one study<sup>25</sup> reported that there was no effect of RSBY on CHE. According to Azam,<sup>14</sup> the effect was same for both rural and urban households. RSBY increased the likelihood of CHE<sup>25</sup>.<sup>14</sup> All these findings about the impact of RSBY on CHE were not significant. However, incidence of CHE was significantly reduced for RSBY households with childbirth in last one year of data collection.<sup>25</sup> Two studies<sup>14 19</sup> performed matching and analyzed using DID analysis, and other studies<sup>16 25</sup> performed matching and linear and logistic regression.</p> | <p>The effect of RSBY on impoverishment was not clear. One study<sup>16</sup> reported that RSBY had no effect on impoverishment due to OOP on inpatient care on the total overall probability of impoverishment. However, in another study<sup>25</sup> among RSBY enrolled APL households the incidence of health expenditure induced poverty was significantly increased i.e., APL households were pushed into BPL because of health expenditure. Both the studies performed matching and used regression analysis, linear and logistic regression</p> |
|---------------------------------------------------------------------------------------------------------------------------------------------------------------------------------------------------------------------------------------------------------------------------------------------------------------------------------------------------------------------------------------------------|---------------------------------------------------------------------------------------------------------------------------------------------------------------------------------------------------------------------------------------------------------------------------------------------------------------------------------------------------------------------------------------------------------------------------------------------------------------------------------------------------------------------------------------------------------------------------------------------------------------------------------------------------------------------------------------------------------------------------------------------------------------------------------------------------------------------------------------------------------------------------------------------------------------------------------------------------------------------------------------------------------------------------------|--------------------------------------------------------------------------------------------------------------------------------------------------------------------------------------------------------------------------------------------------------------------------------------------------------------------------------------------------------------------------------------------------------------------------------------------------------------------------------------------------------------------------------------------------------------------------------------------------------------------------------------------------------------------------------------------------------------------------------------------------------------------------------------------------------------------------------------------------------------------------------------------------------------------------|-----------------------------------------------------------------------------------------------------------------------------------------------------------------------------------------------------------------------------------------------------------------------------------------------------------------------------------------------------------------------------------------------------------------------------------------------------------------------------------------------------------------------------------------------------------|

1  
2  
3  
4 al.,<sup>30</sup> used PSM impact analysis to report that  
5 average annual household expenditure on  
6 inpatient care was significantly less for RSBY  
7 beneficiary households when compared with  
8 non-beneficiary households. This study also  
9 reported that average annual household  
10 expenditure spent on inpatient was higher for  
11 RSBY beneficiaries who used the smart card for  
12 inpatient expenses than the RSBY beneficiaries  
13 who did not use the RSBY smart card. However,  
14 a low methodological study<sup>32</sup> reported  
15 a significant increase in inpatient expenditure  
16 for both public and private healthcare, in the  
17 state of Maharashtra. This difference was  
18 calculated using DID method for the year 2004  
19 and 2012 (after implementation of RSBY in the  
20 state).  
21  
22 The scheme did not have a significant effect on  
23 the OOPE expenditure for inpatient visits.<sup>16 19</sup> A  
24 good methodological study<sup>16</sup> applied the  
25 coarsened exact matching and linear and logit  
26 regression to report the impact of RSBY on  
27 OOPE for inpatient visits, among insured

The cost of medicines was significantly  
reduced by 22 INR for RSBY  
households in the rural areas, however  
it increased for the urban households  
by 28 INR, but this result was not  
significant.<sup>14</sup>

1  
23  
4  
5  
6  
7  
8  
9  
10  
11  
12  
13  
14  
15  
16  
17  
18  
19  
20  
21  
22  
23  
24  
25  
26  
27  
28  
29  
30  
31  
32  
33  
34  
35  
36  
37  
38  
39  
40  
41  
42  
43  
44  
45  
46  
47  
48  
49  
50  
51  
52  
53  
54  
55  
56

households. No statistically significant difference was reported between RSBY insured and uninsured households. Another good methodological study,<sup>19</sup> applied Propensity Score Matching (PSM) and DID approach, to find the impact of RSBY on inpatient OOPE in total household expenditure, by dividing treatment districts into Treatment 1 (TT1) i.e., March 2010 and Treatment 2 (TT2) group i.e., April 2010-March 2012. No impact of RSBY on the inpatient OOPE as share of total household expenditure was observed. The probability of incurring zero OOPE inpatient expenditure was not significantly different for RSBY and non-RSBY families. RSBY increased the probability of incurring inpatient OOPE by 22% (TT1) and 28% (TT2) respectively. However, these findings were not significant.<sup>19</sup>

#### **b. Outpatient OOPE**

Five studies<sup>14 16 18 19 30</sup> provided inconclusive information on the effect of RSBY on outpatient OOPE. RSBY had a negative

57  
58  
59  
60

1  
2  
3  
4 impact on the outpatient expenditure.<sup>14 18</sup>  
5  
6 According to Azam,<sup>14</sup> implementation of RSBY  
7  
8 reduced the per capita outpatient  
9  
10 expenditure for both rural and urban areas.  
11  
12 The outpatient expenditure reduced for  
13  
14 RSBY households for the overall matched  
15  
16 sample and for the matched sample minus  
17  
18 UP and Haryana.<sup>18</sup> There was no statistically  
19  
20 significant difference between RSBY insured  
21  
22 and uninsured households in terms of OOPE  
23  
24 on outpatient visits.<sup>16 30</sup> RSBY increased the  
25  
26 probability of incurring outpatient OOPE  
27  
28 for households  
29  
30 participating in RSBY before March 2010, by  
31  
32 23%; however, there was no significant effect  
33  
34 on the scheme on outpatient OOPE for the  
35  
36 RSBY households between April 2010 and  
37  
38 March 2012.<sup>19</sup>  
39  
40  
41  
42  
43  
44  
45 **c. Total OOPE spending**  
46  
47 Four studies provided information on total  
48  
49 OOPE spending after RSBY implementation.<sup>14</sup>  
50  
51  
52  
53  
54  
55  
56  
57  
58  
59  
60  
16 19 23 RSBY resulted in reduction of total  
OOPE of the households. The findings of these

1  
2  
3  
4  
5  
6  
7  
8  
9  
10  
11  
12  
13  
14  
15  
16  
17  
18  
19  
20  
21  
22  
23  
24  
25  
26  
27  
28  
29  
30  
31  
32  
33  
34  
35  
36  
37  
38  
39  
40  
41  
42  
43  
44  
45  
46  
47  
48  
49  
50  
51  
52  
53  
54  
55  
56  
57  
58  
59  
60

studies were mostly not significant. Two studies used matching and DID for analysis and two used matching and regression.

For peer review only

|                                                                                                                                                                                                                                                                                                                                                                                                   |                                                                                                                                                                                                                                                                                                                                                                                                                                                                                                                                                                                                                                                                                                                                                                                                                                                                                                                                                                                                                                                                                                       |                                                                                                                                                                                                                                                                                                                                                                                                                                                                                                                                                                                                                                                                                                                                                                                                                                                               |                                                                                                                                                                                                                                                                                                                                                                                                                                                                                                                                                                       |
|---------------------------------------------------------------------------------------------------------------------------------------------------------------------------------------------------------------------------------------------------------------------------------------------------------------------------------------------------------------------------------------------------|-------------------------------------------------------------------------------------------------------------------------------------------------------------------------------------------------------------------------------------------------------------------------------------------------------------------------------------------------------------------------------------------------------------------------------------------------------------------------------------------------------------------------------------------------------------------------------------------------------------------------------------------------------------------------------------------------------------------------------------------------------------------------------------------------------------------------------------------------------------------------------------------------------------------------------------------------------------------------------------------------------------------------------------------------------------------------------------------------------|---------------------------------------------------------------------------------------------------------------------------------------------------------------------------------------------------------------------------------------------------------------------------------------------------------------------------------------------------------------------------------------------------------------------------------------------------------------------------------------------------------------------------------------------------------------------------------------------------------------------------------------------------------------------------------------------------------------------------------------------------------------------------------------------------------------------------------------------------------------|-----------------------------------------------------------------------------------------------------------------------------------------------------------------------------------------------------------------------------------------------------------------------------------------------------------------------------------------------------------------------------------------------------------------------------------------------------------------------------------------------------------------------------------------------------------------------|
| <p>1<br/>2<br/>3<br/>4<br/>5<br/>6<br/>7<br/>8<br/>9<br/>10<br/>11<br/>12<br/>13<br/>14<br/>15<br/>16<br/>17<br/>18<br/>19<br/>20<br/>21<br/>22<br/>23<br/>24<br/>25<br/>26<br/>27<br/>28<br/>29<br/>30<br/>31<br/>32<br/>33<br/>34<br/>35<br/>36<br/>37<br/>38<br/>39<br/>40<br/>41<br/>42<br/>43<br/>44<br/>45<br/>46<br/>47<br/>48<br/>49<br/>50<br/>51<br/>52<br/>53<br/>54<br/>55<br/>56</p> | <p>PFHI</p> <p>The PFHI households were less likely to entail OOPE and there was a significant reduction in OOP for these households.<sup>20 21 26</sup> All the studies used regression analysis, both bivariate and multivariate, linear and logit model for analysis. However, using Tobit regression it was found that there was no effect of PFHI schemes on OOPE of the households.<sup>24</sup> For VAS, the OOPE was less for the insured households, when compared to un-insured households, however the two stage least squares (2sls) regression model reported no association between VAS enrolment and size of OOPE.<sup>17</sup> According to Barnes et al.,<sup>31</sup> reduction in OOPE increased with increase in quantiles of spending. At the 75<sup>th</sup> quantile, the reduction in OOPE for VAS households was INR 4485 and at 95<sup>th</sup> quantile it was INR 23548.19, both these findings were statistically significant and were calculated using conditional quantile regression. For the effect of RAS (Andhra Pradesh) there was no association between RAS</p> | <p>Six studies<sup>15 17 21 22 28 31</sup> reported the effect of PFHI schemes on CHE. The PFHIs led to reduction in CHE, however the effect was very small.<sup>21 28</sup> For PSM matched Households, the PFHI enrolled Households were 13 % less likely to experience CHE 10 and 6% less likely to experience CHE 25. For the lowest three quintiles, this effect was even less pronounced as only 0.4% of PFHI households and 1% of PFHI Households were likely to experience CHE10 and CHE 25.<sup>21</sup> There was a consistent increase in the catastrophic headcount threshold 40% of non-food expenditure for treatment, outpatient, inpatient and drugs.<sup>22</sup> This increase was even reported in a long-term sample i.e. households that have been enrolled in the PFHI schemes for a year. Two studies<sup>22 28</sup> used DID for</p> | <p>The PFHIs had a marginal effect on the reduction in impoverishment of households.<sup>21 22</sup> For the overall sample, the PFHI led to marginal reduction in overall impoverishment and OOP impoverishment,<sup>22</sup> for short term and long-term samples (more than a year). However, in the state fixed effect model overall impoverishment was reported that the PFHI schemes had no effect on impoverishment. The state fixed effect model was used because the assumption that presence of different PFHI schemes alter the findings, and this was</p> |
|---------------------------------------------------------------------------------------------------------------------------------------------------------------------------------------------------------------------------------------------------------------------------------------------------------------------------------------------------------------------------------------------------|-------------------------------------------------------------------------------------------------------------------------------------------------------------------------------------------------------------------------------------------------------------------------------------------------------------------------------------------------------------------------------------------------------------------------------------------------------------------------------------------------------------------------------------------------------------------------------------------------------------------------------------------------------------------------------------------------------------------------------------------------------------------------------------------------------------------------------------------------------------------------------------------------------------------------------------------------------------------------------------------------------------------------------------------------------------------------------------------------------|---------------------------------------------------------------------------------------------------------------------------------------------------------------------------------------------------------------------------------------------------------------------------------------------------------------------------------------------------------------------------------------------------------------------------------------------------------------------------------------------------------------------------------------------------------------------------------------------------------------------------------------------------------------------------------------------------------------------------------------------------------------------------------------------------------------------------------------------------------------|-----------------------------------------------------------------------------------------------------------------------------------------------------------------------------------------------------------------------------------------------------------------------------------------------------------------------------------------------------------------------------------------------------------------------------------------------------------------------------------------------------------------------------------------------------------------------|

1  
23  
4  
5  
6  
7  
8  
9  
10  
11  
12  
13  
14  
15  
16  
17  
18  
19  
20  
21  
22  
23  
24  
25  
26  
27  
28  
29  
30  
31  
32  
33  
34  
35  
36  
37  
38  
39  
40  
41  
42  
43  
44  
45  
46  
47  
48  
49  
50  
51  
52  
53  
54  
55  
56

enrolment and size of OOPE, by using 2sls regression model.<sup>17</sup> By using DID, among phase 1 (2007), for Arogyashree enrolled households in Andhra Pradesh, significant reduction in per capital monthly OOP inpatient expenditure and inpatient drug expenditure were observed;<sup>15</sup> and an increase in inpatient expenditure for RAS households.<sup>27</sup> For RAS, in AP, Katyal et al.,<sup>32</sup> reported a significant increase in both public and private inpatient expenditure, when calculated for the year 2004 and 2012 via DID analysis. Enrolment in CHIS of Tamil Nadu was not significantly associated with size of OOPE.<sup>17</sup> For the CHIS operational in Kerala, the mean OOP expenses for inpatient services among insured participants (INR 448.95) was significantly higher than that of the uninsured households (INR 159.93), using Mann-Whitney U test.<sup>33</sup> There was one study<sup>29</sup> that reported findings on the effect of PMJAY on OOPE and CHE. It was

analysis, whereas another used logistic regression<sup>21</sup> for analysis. The VAS scheme had a limited effect on CHE; there was no association between enrolment in VAS and CHE 25, CHE 40 and CHE10, using two-step IV Probit model.<sup>17</sup> In another study<sup>31</sup> it was found that percentage of VAS households borrowing money for health reasons in the past one year was lower than non-VAS households. This was a statistically significant finding. According to Barnes et al.,<sup>31</sup> there was a marginal reduction in % of CHE (both as % of non-food expenditure and total expenditure) for VAS Households than non-VAS households. The statistical significance of this finding was mixed as it consists of both non-significant and significant results, however, reduction for 40% and 80% of CHE of the total non-food expenditure was significant

analyzed using regression analysis.<sup>22</sup> There was no significant difference seen among Arogyashree enrolled households in Andhra Pradesh, compared to south India and all India sample on impoverishment and impoverishment d OOPE.<sup>15</sup>

57  
58  
59  
60

reported that enrolment in PMJAY did not decrease the OOPE or CHE.

According to this study, more reduction in OOPE for PMJAY enrolled households than other PFHI enrolled households, but this finding was not significant. Reduction in log of OOPE was marginally more for PMJAY enrolled households than other PFHIs, this was a significant finding. OLS model was used for calculation of the abovementioned continuous outcome variable. As per the Probit model, there was a significant increase in CHE25 and CHE40 of PMJAY enrolled Households. But this does not hold true for PSM model, according to this model reduction in OOPE for PMJAY and other PFHI was significant and CHE10 was not associated with PMJAY and PFHI enrolment according to any of the models. The naïve OLS model showed no association between the size of OOPE and enrolment under PMJAY or any of the PFHI schemes, these findings did not change under

and reduction in 40% of CHE of the total expenditure was also a significant finding. Additionally, money spent by VAS Households on CHE was lesser than non-VAS Households. This was statistically significant. For RAS in Andhra Pradesh, there was no association between RAS enrolment and CHE25, CHE40, CHE10, by using two-step IV Probit model.<sup>17</sup> There was no clear effect of Arogyashree enrolment on CHE.<sup>15</sup> Enrolment in CHIS of Tamil Nadu was not significantly associated with CHE25, CHE40 and CHE10.<sup>17</sup>



1  
2  
3  
4  
5  
6  
7  
8  
9  
10  
11  
12  
13  
14  
15  
16  
17  
18  
19  
20  
21  
22  
23  
24  
25  
26  
27  
28  
29  
30  
31  
32  
33  
34  
35  
36  
37  
38  
39  
40  
41  
42  
43  
44  
45  
46  
47  
48  
49  
50  
51  
52  
53  
54  
55  
56  
57  
58  
59  
60

propensity score matching and Instrumental  
Variable (IV) models

For peer review only

1  
2  
3  
4  
5  
6  
7  
8  
9  
10  
11  
12  
13  
14  
15  
16  
17  
18  
19  
20  
21  
22  
23  
24  
25  
26  
27  
28  
29  
30  
31  
32  
33  
34  
35  
36  
37  
38  
39  
40  
41  
42  
43  
44  
45  
46  
47  
48  
49  
50  
51  
52  
53  
54  
55  
56  
57  
58  
59  
60

## Utilization of healthcare

| Scheme                              | Outcome                                                                                                                                                                                                                                                                                                                                                                                                                                                                                                                                                                                                                                                                                                                                                                                                                                                                                                                                                                                                                                                                                                                                                                                                                                                                                                                                                                                    |
|-------------------------------------|--------------------------------------------------------------------------------------------------------------------------------------------------------------------------------------------------------------------------------------------------------------------------------------------------------------------------------------------------------------------------------------------------------------------------------------------------------------------------------------------------------------------------------------------------------------------------------------------------------------------------------------------------------------------------------------------------------------------------------------------------------------------------------------------------------------------------------------------------------------------------------------------------------------------------------------------------------------------------------------------------------------------------------------------------------------------------------------------------------------------------------------------------------------------------------------------------------------------------------------------------------------------------------------------------------------------------------------------------------------------------------------------|
| Pradhan Mantri Bima Yojana (PM-JAY) | <p>Around eight studies<sup>14 16 23 26 27 30 32 35</sup> looked at the impact of RSBY on healthcare utilization. The outcomes assessed by these studies include reporting of illness, hospitalization rate, outpatient care and inpatient care utilization and utilization of hospital services. The impact of RSBY on hospitalization was assessed by six studies;<sup>14 23 26 27 32 35</sup> all studies showed increase in the hospitalization, of which three studies showed significant increase in hospitalization among female heads, scheduled tribes and for poorest.<sup>27</sup> For women seeking treatment in obstetrics department.<sup>26</sup> The studies<sup>16 30</sup> suggested increase in both, inpatient and outpatient services. However, the results were significant for inpatient care for one of the studies.<sup>16</sup> A study<sup>14</sup> assessed the impact of HSA on reporting morbidity and seeking treatment for illness in both rural and urban areas. The ATT analysis suggested increase in reporting of morbidity, seeking treatment for short term and long-term illnesses and long-term morbidity in rural India compared to urban India. The increased value ranges from 0.7% to 3.2%. In urban India, the increase in reporting illness by RSBY holders varied from 2.3%-2.4%, which was not statistically significant.<sup>14</sup></p> |

1  
23  
4 PFHI

5

6

7

8

9

10

11

12

13

14

15

16

17

18

19

20

21

22

23

24

25

26

27

28

29

30

31

32

33

34

35

36

37

38

39

40

41

42

43

44

45

46

47

48

49

50

51

52

53

54

55

56

Two studies<sup>36 37</sup> exclusively assessed hospital utilization rate with respect to implementation VAS. The results suggested significant increase in utilization of healthcare for all tertiary care facilities. The quasi-randomized study suggested significant increase in healthcare utilization with respect to accessing healthcare for any symptoms with adjusted difference of 4.96%. The increase in rate of hospitalization in primary and tertiary care varied from 4.3% to 12.3%, showing the significant change in healthcare utilization after the implementation of VAS. The quasi-randomized study<sup>37</sup> found significant increase in treatment seeking behavior for symptoms associated with cardiac conditions than for non-cardiac symptoms. Eligible households for VAS were 4.4% more likely to seek treatment than non-eligible households.

The RAS was assessed by Katyal et al.<sup>32</sup>

The DID analysis suggested increase in healthcare utilization in Andhra Pradesh and study by<sup>27</sup> suggested increase in hospitalization.

The five studies,<sup>20 21 24 26 33</sup> assessed the impact of CHIS and other PFHIs and suggests increase in inpatient and outpatient services. The matched cross-sectional study<sup>33</sup> suggests significant increase in overall utilization of inpatient services and non-significant results with respect to outpatient services among CHIS insured compared to uninsured. The multivariate analysis<sup>24</sup> showed increased hospitalization, increase in hospitalization for chronic conditions, increase in hospitalization among all age groups for PFHI households. It was also observed, via Tobit regression model, being enrolled in PFHI was not significantly associated with length of stay during hospitalization, however, people with chronic illness reported significantly increased length of stay in the hospitals. Though the association of HI with healthcare utilization was high, inequality in accessing healthcare was higher among the higher economic people. The naive profit model analysis by a study<sup>17</sup> which assessed VAS, RAS and CHIS suggested significant increase in hospitalization in Karnataka after the implementation of VAS.

57

58

59

60

1  
2  
3  
4 The only study<sup>29</sup> that evaluated PMJAY; the data analysis from NSS data based on PSM and naive models on the  
5  
6 hospitalization did not show any significant difference in hospital care utilization among both enrolled and non-enr  
7  
8 population for insurance.  
9  
10  
11  
12  
13  
14  
15  
16  
17  
18  
19  
20  
21  
22  
23  
24  
25  
26  
27  
28  
29  
30  
31  
32  
33  
34  
35  
36  
37  
38  
39  
40  
41  
42  
43  
44  
45  
46  
47  
48  
49  
50  
51  
52  
53  
54  
55  
56

For peer review only

**Willingness-to-pay (WTP)**

| II scheme | Outcomes                                                                                                                                                                                                                                                                                                                                                                                                                                                                                                                                                                 |
|-----------|--------------------------------------------------------------------------------------------------------------------------------------------------------------------------------------------------------------------------------------------------------------------------------------------------------------------------------------------------------------------------------------------------------------------------------------------------------------------------------------------------------------------------------------------------------------------------|
| S and S   | <p>There was one study<sup>38</sup> that reported WTP for the insurance scheme. A majority (71 per cent) of CGHS beneficiaries considered that their current contribution was low, and they were willing to contribute more. Only 28 per cent ECHS beneficiaries were willing to pay an additional monthly financial contribution for better quality healthcare under the schemes. The CGHS beneficiaries from low employment grade were more willing to pay an additional amount to their existing monthly financial contribution than the higher employment grade.</p> |

Figure 1: PRISMA flow diagram

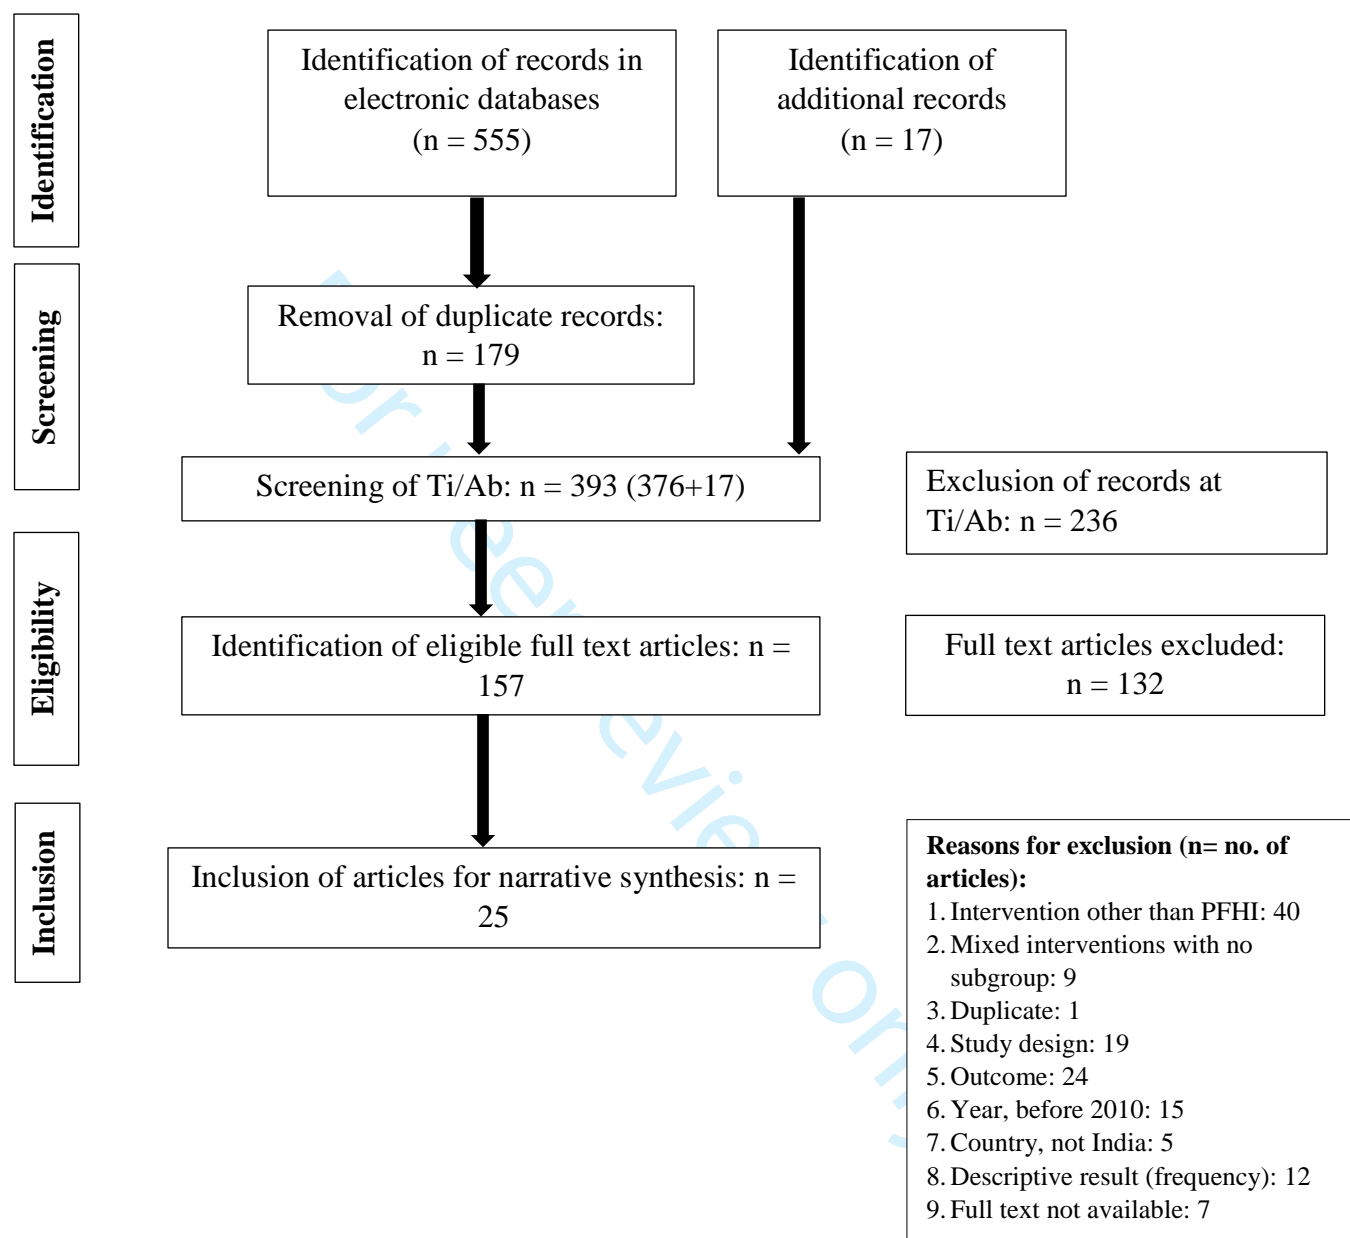

1  
2  
3  
4  
5  
6  
7  
8  
9  
10  
11  
12  
13  
14  
15  
16  
17  
18  
19  
20  
21  
22  
23  
24  
25  
26  
27  
28  
29  
30  
31  
32  
33  
34  
35  
36  
37  
38  
39  
40  
41  
42  
43  
44  
45  
46  
47  
48  
49  
50  
51  
52  
53  
54  
55  
56  
57  
58  
59  
60

For peer review only

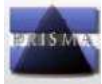

# PRISMA 2009 Checklist

| Section/topic                      | #  | Checklist item                                                                                                                                                                                                                                                                                              | Reported on page # |
|------------------------------------|----|-------------------------------------------------------------------------------------------------------------------------------------------------------------------------------------------------------------------------------------------------------------------------------------------------------------|--------------------|
| <b>TITLE</b>                       |    |                                                                                                                                                                                                                                                                                                             |                    |
| Title                              | 1  | Identify the report as a systematic review, meta-analysis, or both.                                                                                                                                                                                                                                         | 1                  |
| <b>ABSTRACT</b>                    |    |                                                                                                                                                                                                                                                                                                             |                    |
| Structured summary                 | 2  | Provide a structured summary including, as applicable: background; objectives; data sources; study eligibility criteria, participants, and interventions; study appraisal and synthesis methods; results; limitations; conclusions and implications of key findings; systematic review registration number. | 1-2                |
| <b>INTRODUCTION</b>                |    |                                                                                                                                                                                                                                                                                                             |                    |
| Rationale                          | 3  | Describe the rationale for the review in the context of what is already known.                                                                                                                                                                                                                              | 6                  |
| Objectives                         | 4  | Provide an explicit statement of questions being addressed with reference to participants, interventions, comparisons, outcomes, and study design (PICOS).                                                                                                                                                  | 6                  |
| <b>METHODS</b>                     |    |                                                                                                                                                                                                                                                                                                             |                    |
| Protocol and registration          | 5  | Indicate if a review protocol exists, if and where it can be accessed (e.g., Web address), and, if available, provide registration information including registration number.                                                                                                                               | -                  |
| Eligibility criteria               | 6  | Specify study characteristics (e.g., PICOS, length of follow-up) and report characteristics (e.g., years considered, language, publication status) used as criteria for eligibility, giving rationale.                                                                                                      | 7                  |
| Information sources                | 7  | Describe all information sources (e.g., databases with dates of coverage, contact with study authors to identify additional studies) in the search and date last searched.                                                                                                                                  | 7-8                |
| Search                             | 8  | Present full electronic search strategy for at least one database, including any limits used, such that it could be repeated.                                                                                                                                                                               | 7-8                |
| Study selection                    | 9  | State the process for selecting studies (i.e., screening, eligibility, included in systematic review, and, if applicable, included in the meta-analysis).                                                                                                                                                   | 8                  |
| Data collection process            | 10 | Describe method of data extraction from reports (e.g., piloted forms, independently, in duplicate) and any processes for obtaining and confirming data from investigators.                                                                                                                                  | 8                  |
| Data items                         | 11 | List and define all variables for which data were sought (e.g., PICOS, funding sources) and any assumptions and simplifications made.                                                                                                                                                                       | 8-9                |
| Risk of bias in individual studies | 12 | Describe methods used for assessing risk of bias of individual studies (including specification of whether this was done at the study or outcome level), and how this information is to be used in any data synthesis.                                                                                      | 9                  |
| Summary measures                   | 13 | State the principal summary measures (e.g., risk ratio, difference in means).                                                                                                                                                                                                                               | 10                 |
| Synthesis of results               | 14 | Describe the methods of handling data and combining results of studies, if done, including measures of consistency (e.g., $I^2$ ) for each meta-analysis.                                                                                                                                                   | 10                 |



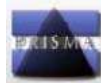

# PRISMA 2009 Checklist

| Section/topic                 | #  | Checklist item                                                                                                                                                                                           | Reported on page # |
|-------------------------------|----|----------------------------------------------------------------------------------------------------------------------------------------------------------------------------------------------------------|--------------------|
| Risk of bias across studies   | 15 | Specify any assessment of risk of bias that may affect the cumulative evidence (e.g., publication bias, selective reporting within studies).                                                             | -                  |
| Additional analyses           | 16 | Describe methods of additional analyses (e.g., sensitivity or subgroup analyses, meta-regression), if done, indicating which were pre-specified.                                                         | -                  |
| <b>RESULTS</b>                |    |                                                                                                                                                                                                          |                    |
| Study selection               | 17 | Give numbers of studies screened, assessed for eligibility, and included in the review, with reasons for exclusions at each stage, ideally with a flow diagram.                                          | 10                 |
| Study characteristics         | 18 | For each study, present characteristics for which data were extracted (e.g., study size, PICOS, follow-up period) and provide the citations.                                                             | 31-37              |
| Risk of bias within studies   | 19 | Present data on risk of bias of each study and, if available, any outcome level assessment (see item 12).                                                                                                | 36-37              |
| Results of individual studies | 20 | For all outcomes considered (benefits or harms), present, for each study: (a) simple summary data for each intervention group (b) effect estimates and confidence intervals, ideally with a forest plot. | 37-53              |
| Synthesis of results          | 21 | Present results of each meta-analysis done, including confidence intervals and measures of consistency.                                                                                                  | -                  |
| Risk of bias across studies   | 22 | Present results of any assessment of risk of bias across studies (see Item 15).                                                                                                                          | -                  |
| Additional analysis           | 23 | Give results of additional analyses, if done (e.g., sensitivity or subgroup analyses, meta-regression [see Item 16]).                                                                                    | -                  |
| <b>DISCUSSION</b>             |    |                                                                                                                                                                                                          |                    |
| Summary of evidence           | 24 | Summarize the main findings including the strength of evidence for each main outcome; consider their relevance to key groups (e.g., healthcare providers, users, and policy makers).                     | 13-16              |
| Limitations                   | 25 | Discuss limitations at study and outcome level (e.g., risk of bias), and at review-level (e.g., incomplete retrieval of identified research, reporting bias).                                            | 16                 |
| Conclusions                   | 26 | Provide a general interpretation of the results in the context of other evidence, and implications for future research.                                                                                  | 17                 |
| <b>FUNDING</b>                |    |                                                                                                                                                                                                          |                    |
| Funding                       | 27 | Describe sources of funding for the systematic review and other support (e.g., supply of data); role of funders for the systematic review.                                                               | 19                 |

From: Moher D, Liberati A, Tetzlaff J, Altman DG, The PRISMA Group (2009). Preferred Reporting Items for Systematic Reviews and Meta-Analyses: The PRISMA Statement. PLoS Med 6(6): e1000097. doi:10.1371/journal.pmed1000097

For more information, visit: [www.prisma-statement.org](http://www.prisma-statement.org).

### Supplementary file 1: Search Strategy

1  
2  
3  
4  
5  
6 ("Health Insurance"[Title/Abstract] OR "Community health insurance"[Title/Abstract] OR  
7  
8 "Social health insurance"[Title/Abstract] OR "Group health insurance"[Title/Abstract] OR  
9  
10 "Karunya health scheme"[Title/Abstract] OR Yeshasvini[Title/Abstract] OR "Ayushman Bharat"  
11  
12 [Title/Abstract] OR "Universal health insurance scheme"[Title/Abstract] OR  
13  
14 "Rashtriya swasthya bima yojana"[Title/Abstract] OR "Medical Insurance"[Title/Abstract] OR  
15  
16 "Public health insurance" [Title/Abstract] OR "Universal health care"[Title/Abstract] OR  
17  
18 PMJAY[Title/Abstract] OR MSBY[Title/Abstract] OR RSBY[Title/Abstract]  
19  
20 OR Aarogyasri[Title/Abstract] OR "Vajpayee Arogyashree"[Title/Abstract] OR "Kalaingar State  
21  
22 Health Insurance Scheme"[Title/Abstract] OR ESIS[Title/Abstract] OR  
23  
24 Medclaim[Title/Abstract] OR CGHS[Title/Abstract] OR BKKY[Title/Abstract]) AND ("Health  
25  
26 care utilisation"[Title/Abstract] OR "Healthcare utilization"[Title/Abstract] OR  
27  
28 "Healthcare utilisation"[Title/Abstract] OR "Health status"[Title/Abstract] OR "Better  
29  
30 Health"[Title/Abstract] OR "Willingness to pay"[Title/Abstract] OR WTP[Title/Abstract] OR  
31  
32 "Readiness to pay"[Title/Abstract] OR "Financial protection"[Title/Abstract] OR "Medical  
33  
34 service utilization"[Title/Abstract] OR enrolment[Title/Abstract] OR impact[Title/Abstract]))  
35  
36 AND (India OR "South Asia" OR LMIC OR Indian OR "Indian states") 124 filter humans  
37  
38  
39  
40  
41  
42  
43  
44  
45  
46  
47  
48  
49  
50  
51  
52  
53  
54  
55  
56  
57  
58  
59  
60

Supplementary file 3: Characteristics of included studies

| Study ID      | Objective                                                                                                 | Location | Population<br>(n, Age,<br>Gender,<br>Contextual<br>factors)                                                            | Name and<br>type of<br>insurance and<br>year | Intervention/Exposure<br><br>Details of insurance<br><br>Incentives/benefits<br><br>Time duration of<br><br>insurance,<br><br>Comparator                                                                                    | Outcomes                                                                                                                                                                                   | Study design                                                                                                                                     |
|---------------|-----------------------------------------------------------------------------------------------------------|----------|------------------------------------------------------------------------------------------------------------------------|----------------------------------------------|-----------------------------------------------------------------------------------------------------------------------------------------------------------------------------------------------------------------------------|--------------------------------------------------------------------------------------------------------------------------------------------------------------------------------------------|--------------------------------------------------------------------------------------------------------------------------------------------------|
| Azam,<br>2017 | To evaluate<br>the impact of<br>Rastriya Swast<br>hya Bima<br>Yojana<br>(RSBY)-on-<br>RSBY<br>beneficiary | National | Data from<br>2011-12: n=<br>29755 HHs<br>(21489 rural<br>and 8257<br>urban) from<br>260 RSBY<br>districts in<br>India. | RSBY Scheme                                  | -Intervention group<br>consists of HHs that were<br>enrolled in RSBY and had<br>an RSBY smart card.<br>The beneficiary HHs were<br>entitled to a hospital<br>coverage of Indian<br>National Rupees (INR)<br>30000 per annum | Average treatment<br>impact on treated<br>(ATT), utilization<br>of health services,<br>per capita out-of-<br>pocket expenditure<br>(OOPE), and per<br>patient OOPE on<br>major morbidities | Impact evaluation<br>(secondary data) from<br>two waves of India<br>Human Development<br>survey conducted in<br>2011-12 and 2004-05<br>and Human |

|                        |                                                                                                                        |                                                                                                                 |                                                                                                       |                                   |                                                                                                                                                                           |                                                      |                                                         |
|------------------------|------------------------------------------------------------------------------------------------------------------------|-----------------------------------------------------------------------------------------------------------------|-------------------------------------------------------------------------------------------------------|-----------------------------------|---------------------------------------------------------------------------------------------------------------------------------------------------------------------------|------------------------------------------------------|---------------------------------------------------------|
|                        | households<br>(HHs)                                                                                                    |                                                                                                                 | Three states<br>viz. Andhra<br>Pradesh,<br>Karnataka and<br>Tamil Nadu<br>were not<br>included        |                                   | -Control group were the<br>HHs in the same district<br>but not enrolled in RSBY<br>or not having the RSBY<br>cards                                                        |                                                      | Development Profile<br>of India conducted in<br>1993-94 |
| Barnes et<br>al., 2017 | To estimate<br>the impact of<br>social health<br>insurance (HI)<br>on financial<br>risk by<br>utilizing data<br>from a | Sample<br>villages from<br>Shimoga, Da<br>vengere and<br>Chitradurga d<br>istricts<br>of Southern<br>Karnataka. | 272 villages<br>from the<br>northern part<br>of Karnataka<br>and 300<br>villages from<br>the southern | Vajpayee<br>Arogya Shree<br>(VAS) | Intervention: Households<br>that had access to the VAS<br>schemes<br><br>Control: HHs south of the<br>eligibility border that did<br>not have access to the VAS<br>scheme | Catastrophic health<br>expenditure (CHE)<br>and OOPE | Cross-sectional<br>household survey                     |

1  
2  
3  
4  
5  
6  
7  
8  
9  
10  
11  
12  
13  
14  
15  
16  
17  
18  
19  
20  
21  
22  
23  
24  
25  
26  
27  
28  
29  
30  
31  
32  
33  
34  
35  
36  
37  
38  
39  
40  
41  
42  
43  
44  
45  
46  
47

|                                    |                                                                                                                      |                                                                                                                                   |                                                                           |      |             |                                                                                                                       |                                                                            |
|------------------------------------|----------------------------------------------------------------------------------------------------------------------|-----------------------------------------------------------------------------------------------------------------------------------|---------------------------------------------------------------------------|------|-------------|-----------------------------------------------------------------------------------------------------------------------|----------------------------------------------------------------------------|
|                                    | natural experi<br>ment created<br>by the phased<br>roll-out of a<br>social HI<br>program for<br>the poor in<br>India | Villages from<br>Uttar<br>Kannada,<br>Haveri<br>and Bellari di<br>stricts of<br>northern part<br>of Karnataka<br>were<br>included | part of<br>Karnataka<br>Total sample<br>was 6964 HHs<br>with BPL<br>cards |      |             |                                                                                                                       |                                                                            |
| Dror<br>and Vella<br>kkal,<br>2012 | To find if<br>RSBY is<br>India's<br>flagship<br>platform for<br>the                                                  | National                                                                                                                          | Adults and<br>children                                                    | RSBY | RSBY scheme | 1. Coverage,<br>enrolment and cost<br>for providing RSBY<br>to the beneficiaries<br>2. Access to<br>hospitalizations/ | Secondary data<br>analysis from RSBY<br>data available on<br>website, 2011 |

|                            |                                                       |                       |                                              |                    |                                                                                                                                                                                                                                                 |                                                  |                                                                                 |
|----------------------------|-------------------------------------------------------|-----------------------|----------------------------------------------|--------------------|-------------------------------------------------------------------------------------------------------------------------------------------------------------------------------------------------------------------------------------------------|--------------------------------------------------|---------------------------------------------------------------------------------|
|                            | introduction of Universal Hospital Insurance.         |                       |                                              |                    |                                                                                                                                                                                                                                                 | health care for the poor people                  |                                                                                 |
| Fan, Karan and Mahal, 2012 | To assess the impact of Arogyashree on household OOPE | Andhra Pradesh, India | Households in all the districts of the state | Arogyashree scheme | Intervention group: people living in the districts under Phase 1 (2007-2008) and Phase 2 (only 2008) of the NSSO survey<br><br>Control group: People living in the districts that are not covered by with Phase 1 or Phase 2 of the NSSO survey | 1.Per capita OOPE<br>2. CHE<br>3. Impoverishment | Impact evaluation-<br><br>Analysis of NSSO and consumer health expenditure data |

1  
2  
3  
4  
5  
6  
7  
8  
9  
10  
11  
12  
13  
14  
15  
16  
17  
18  
19  
20  
21  
22  
23  
24  
25  
26  
27  
28  
29  
30  
31  
32  
33  
34  
35  
36  
37  
38  
39  
40  
41  
42  
43  
44  
45  
46  
47

|  |  |  |  |  |                                                                                                                                                                                                                                                                                                                                                                                     |  |  |
|--|--|--|--|--|-------------------------------------------------------------------------------------------------------------------------------------------------------------------------------------------------------------------------------------------------------------------------------------------------------------------------------------------------------------------------------------|--|--|
|  |  |  |  |  | <p><b>Treatment groups</b></p> <p><b>(Andhra Pradesh)</b></p> <p>Phase 1: Activities started in April 2007 and renewal in April 2008. Phase I districts were Ananthapur, Mahabubnagar, and Srikakulam. n: 2004-05=1702 and 2007-08 =448</p> <p>Phase 2: Activities started in December 2007 and renewed in December 2008. Phase II districts were East Godavari, West Godavari,</p> |  |  |
|--|--|--|--|--|-------------------------------------------------------------------------------------------------------------------------------------------------------------------------------------------------------------------------------------------------------------------------------------------------------------------------------------------------------------------------------------|--|--|

|              |                                     |                     |                                 |                          |                                                                                                                                                                                                                                                                                                                         |                                            |                                      |
|--------------|-------------------------------------|---------------------|---------------------------------|--------------------------|-------------------------------------------------------------------------------------------------------------------------------------------------------------------------------------------------------------------------------------------------------------------------------------------------------------------------|--------------------------------------------|--------------------------------------|
|              |                                     |                     |                                 |                          | <p>Nalgonda, Rangareddy, and Chittoor</p> <p>n: 2004-05 = 2057 and 2007-08= 863</p> <p><b>Control Group (Andhra Pradesh)</b> that were not covered by Phases 1 and 2.</p> <p>2004-2005 (n)= 5269</p> <p>2007-2008 (n)= 2172</p> <p><b>Control Groups (All India)</b></p> <p>n= 2004-05: 116,136 and 2007-08: 46,814</p> |                                            |                                      |
| Garg, Beba & | To find out the effect of enrolment | Chhattisgarh, India | NSS survey in 2004 and 2014 and | Pradha Mantri Jan Arogya | Beneficiaries of PMJAY scheme                                                                                                                                                                                                                                                                                           | Enrolment, utilization of hospital-care in | Impact evaluation from NSSO data and |



1  
2  
3  
4  
5  
6  
7  
8  
9  
10  
11  
12  
13  
14  
15  
16  
17  
18  
19  
20  
21  
22  
23  
24  
25  
26  
27  
28  
29  
30  
31  
32  
33  
34  
35  
36  
37  
38  
39  
40  
41  
42  
43  
44  
45  
46  
47

|                   |                                                                                                                                                                        |  |                                                                                                                                                                                                              |                                                                                                           |  |                              |                           |
|-------------------|------------------------------------------------------------------------------------------------------------------------------------------------------------------------|--|--------------------------------------------------------------------------------------------------------------------------------------------------------------------------------------------------------------|-----------------------------------------------------------------------------------------------------------|--|------------------------------|---------------------------|
| Tripathi,<br>2020 | under Prime<br>Minister Jan<br>Arogya<br>Yojana<br>(PMJAY) in<br>improving<br>utilization of<br>hospital<br>services and<br>financial<br>protection in<br>Chhattisgarh |  | primary<br>household<br>survey in<br>2019 (for<br>comparison)<br>NSS in 2004:<br>6375<br>individuals<br>NSS in 2014=<br>7651<br>individuals<br>Primary<br>survey in<br>2019= 15361<br>individuals<br>covered | Yojana<br>(PMJAY)<br>Mukhyamantri<br>Swasthya Bima<br>Yojana<br>(MSBY) for<br>non-poor in<br>Chhattisgarh |  | OOPE and<br>incidence of CHE | primary survey in<br>2019 |
|-------------------|------------------------------------------------------------------------------------------------------------------------------------------------------------------------|--|--------------------------------------------------------------------------------------------------------------------------------------------------------------------------------------------------------------|-----------------------------------------------------------------------------------------------------------|--|------------------------------|---------------------------|

|                                               |                                                                                                                                                                            |                                          |                              |      |                        |                                        |                                                                                                                                          |
|-----------------------------------------------|----------------------------------------------------------------------------------------------------------------------------------------------------------------------------|------------------------------------------|------------------------------|------|------------------------|----------------------------------------|------------------------------------------------------------------------------------------------------------------------------------------|
|                                               |                                                                                                                                                                            |                                          |                              |      |                        |                                        |                                                                                                                                          |
| Garg,<br>Chowdhury &<br>Sundararaman,<br>2019 | To evaluate the PFHI in three states (Andhra Pradesh, Karnataka and Tamil Nadu) in improving utilization of hospital services and financial protection against expenses of | Andhra Pradesh, Karnataka and Tamil Nadu | Below Poverty Line (BPL) HHs | PFHI | Enrolment PFHI schemes | -CHE and OOPE<br>-Hospitalization rate | Secondary data analysis of the two rounds of NSSO cross-sectional survey, 60 <sup>th</sup> round: 2004 and 71 <sup>st</sup> round: 2014. |

|                     |                                                                                                                                                   |                                                                                                                                         |                                                                                                                               |      |                          |                                                               |                                     |
|---------------------|---------------------------------------------------------------------------------------------------------------------------------------------------|-----------------------------------------------------------------------------------------------------------------------------------------|-------------------------------------------------------------------------------------------------------------------------------|------|--------------------------|---------------------------------------------------------------|-------------------------------------|
|                     | hospitalization                                                                                                                                   |                                                                                                                                         |                                                                                                                               |      |                          |                                                               |                                     |
| Ghosh & Gupta, 2017 | To assess the impact of the scheme on access to healthcare and financial protection by utilizing the latest NSSO data on morbidity and healthcare | National States that did not have any PFHI schemes other than RSBY Andhra Pradesh, Tamil Nadu, Maharashtra, Goa, Karnataka, Andaman and | 18 states, covering 35,748 HHs. Out of these 4112 HHs i.e., 11.5% were treated and 31636 HHs i.e., 88.5% of HHs were control. | RSBY | Enrolment in RSBY scheme | 1) Utilization of health care<br>2) Financial risk protection | An impact evaluation from NSSO data |

|  |  |                                                                                                                                                                                       |  |  |  |  |  |
|--|--|---------------------------------------------------------------------------------------------------------------------------------------------------------------------------------------|--|--|--|--|--|
|  |  | Nicobar<br>Islands,<br>Daman and<br>Diu Dadar<br>and Nagar<br>Haveli were<br>excluded.<br>Arunachal<br>Pradesh,<br>Puducherry,<br>Delhi and<br>Jammu Kash<br>mir were not<br>selected |  |  |  |  |  |
|--|--|---------------------------------------------------------------------------------------------------------------------------------------------------------------------------------------|--|--|--|--|--|

1  
2  
3  
4  
5  
6  
7  
8  
9  
10  
11  
12  
13  
14  
15  
16  
17  
18  
19  
20  
21  
22  
23  
24  
25  
26  
27  
28  
29  
30  
31  
32  
33  
34  
35  
36  
37  
38  
39  
40  
41  
42  
43  
44  
45  
46  
47

|                              |                                                                                                                             |                                                           |                                                                         |      |                                                                                                                                                                                                                                                                                                                                                                        |                                                                                                                                                                                                                                                                      |                                                                                                                                                                                                    |
|------------------------------|-----------------------------------------------------------------------------------------------------------------------------|-----------------------------------------------------------|-------------------------------------------------------------------------|------|------------------------------------------------------------------------------------------------------------------------------------------------------------------------------------------------------------------------------------------------------------------------------------------------------------------------------------------------------------------------|----------------------------------------------------------------------------------------------------------------------------------------------------------------------------------------------------------------------------------------------------------------------|----------------------------------------------------------------------------------------------------------------------------------------------------------------------------------------------------|
| Johnson & Krishnaswamy, 2012 | To estimate the impact of RSBY on hospitalization and OOP health spending using data from the NSSO from 2004-05 and 2009-10 | All India except Andhra Pradesh, Karnataka and Tamil Nadu | n= 297 control and 204 treatment districts with a total of 186,065 HHs. | RSBY | Out of the total 186,065 HHs, 102,810 were from the Pre-intervention round and 83,255 from the post round<br><br>Out of the 83,255 HHs in the post round observations, 25,548 HHs were surveyed two months after RSBY was introduced (this was fixed as the minimum duration to be considered as treated) and hence treated. Out of these, 12,995 were predicted to be | 1. Impact of RSBY (in INR per capita per month)<br>-OP expenditure<br>-IP expenditure<br>-Total medical expenditure<br>- IP drug + tests<br>- IP fees<br>-IP hosp. fees.<br>- Was hospitalized<br>- Has OP visit<br>- IP > Rs. 5000 (INR)<br>- IP > Rs. 10,000 (INR) | Secondary data analysis of NSSO data<br><br>Used NSSO round 61 (conducted in 2004-05) and round 66 (conducted in 2009-10), as the pre and post surveys for measuring the potential impact of RSBY. |
|------------------------------|-----------------------------------------------------------------------------------------------------------------------------|-----------------------------------------------------------|-------------------------------------------------------------------------|------|------------------------------------------------------------------------------------------------------------------------------------------------------------------------------------------------------------------------------------------------------------------------------------------------------------------------------------------------------------------------|----------------------------------------------------------------------------------------------------------------------------------------------------------------------------------------------------------------------------------------------------------------------|----------------------------------------------------------------------------------------------------------------------------------------------------------------------------------------------------|

1  
2  
3  
4  
5  
6  
7  
8  
9  
10  
11  
12  
13  
14  
15  
16  
17  
18  
19  
20  
21  
22  
23  
24  
25  
26  
27  
28  
29  
30  
31  
32  
33  
34  
35  
36  
37  
38  
39  
40  
41  
42  
43  
44  
45  
46  
47

|  |  |  |  |  |                                                                                                      |                                                                                                                                                                                                                                                                  |  |
|--|--|--|--|--|------------------------------------------------------------------------------------------------------|------------------------------------------------------------------------------------------------------------------------------------------------------------------------------------------------------------------------------------------------------------------|--|
|  |  |  |  |  | <p>a BPL card holder and<br/>hence in effect the treated<br/>sub-sample<br/>RSBY in reducing OOP</p> | <p>-Ratio IP/<br/>HHD Exp &gt; 10%<br/>-Ratio IP/ HHD<br/>Exp &gt; 20%<br/>- Ratio IP/ HHD<br/>Exp &gt; 40%<br/><br/>Small decrease in<br/>out-of-pocket<br/>household<br/>outpatient<br/>expenditure and<br/>subsequently total<br/>medical<br/>expenditure</p> |  |
|--|--|--|--|--|------------------------------------------------------------------------------------------------------|------------------------------------------------------------------------------------------------------------------------------------------------------------------------------------------------------------------------------------------------------------------|--|

1  
2  
3  
4  
5  
6  
7  
8  
9  
10  
11  
12  
13  
14  
15  
16  
17  
18  
19  
20  
21  
22  
23  
24  
25  
26  
27  
28  
29  
30  
31  
32  
33  
34  
35  
36  
37  
38  
39  
40  
41  
42  
43  
44  
45  
46  
47

|                                  |                                                                                                                                                                                         |          |                                                                                                                                                                            |                                       |                                                                                                                                                                                                                                                                                                                             |                                                                                                                                                                                                                                        |                                                                                          |
|----------------------------------|-----------------------------------------------------------------------------------------------------------------------------------------------------------------------------------------|----------|----------------------------------------------------------------------------------------------------------------------------------------------------------------------------|---------------------------------------|-----------------------------------------------------------------------------------------------------------------------------------------------------------------------------------------------------------------------------------------------------------------------------------------------------------------------------|----------------------------------------------------------------------------------------------------------------------------------------------------------------------------------------------------------------------------------------|------------------------------------------------------------------------------------------|
| Karan,<br>Yip,<br>Mahal,<br>2017 | To assess, at the national level, the impact of RSBY on financial risk protection of HHs using data from 3 waves of cross-sectional HH surveys of the NSSO and district level enrolment | National | The study used data from three waves of HH CES: 1999 to 2000 (T1 pre-intervention), 2004-05 (T2: pre-intervention) and 2011-12 (post-intervention), conducted by the NSSO. | RSBY implementation began in 2008-09. | <b>Treatment group:</b> Poor HHs in RSBY implementing districts. Further divided into districts, which began participating in RSBY on or before March 2010 and between April 2010 & March 2012. <b>Control:</b> Poor in non-RSBY districts. Poor: belonging to the two poorest expenditure quintiles as a proxy for BPL HHs | OOPE: in terms of inpatient, outpatient & total OOP. Each of these three further includes Probability of any OOP, OOP Level (INR), OOP Share and probability of catastrophic Outcome measured for the time periods 2000, 2005 and 2012 | Impact evaluation using repeated measures cross sectional surveys- Analysis of NSSO data |
|----------------------------------|-----------------------------------------------------------------------------------------------------------------------------------------------------------------------------------------|----------|----------------------------------------------------------------------------------------------------------------------------------------------------------------------------|---------------------------------------|-----------------------------------------------------------------------------------------------------------------------------------------------------------------------------------------------------------------------------------------------------------------------------------------------------------------------------|----------------------------------------------------------------------------------------------------------------------------------------------------------------------------------------------------------------------------------------|------------------------------------------------------------------------------------------|

|                     |                                                                                                           |                                |                                                                                      |                                                                     |                                                                              |                                                                                                                                                       |                                                                                        |
|---------------------|-----------------------------------------------------------------------------------------------------------|--------------------------------|--------------------------------------------------------------------------------------|---------------------------------------------------------------------|------------------------------------------------------------------------------|-------------------------------------------------------------------------------------------------------------------------------------------------------|----------------------------------------------------------------------------------------|
|                     | information from RSBY records                                                                             |                                | Sample sizes in each of the three rounds was between 100,000 and 125,000 households. |                                                                     |                                                                              |                                                                                                                                                       |                                                                                        |
| Katyal et al., 2015 | To assess changes in accessibility, affordability and perceptions of efficiency of private health care IP | Andhra Pradesh and Maharashtra | Used two rounds of NSSO data: 2004 and 2012. Total HHs surveyed (urban): Andhra      | RSBY in Maharashtra and Rajiv Arogya Shree (RAS) in Andhra Pradesh. | Intervention 1: RAS in Andhra Pradesh<br>Intervention 2: RSBY in Maharashtra | -Access to IP care [Hospitalization rate: no. of people hospitalized during the previous year per 1000 population]<br>-Expenditure on hospitalization | A retrospective, longitudinal, controlled quasi-experimental Study (Two large surveys) |



1  
2  
3  
4  
5  
6  
7  
8  
9  
10  
11  
12  
13  
14  
15  
16  
17  
18  
19  
20  
21  
22  
23  
24  
25  
26  
27  
28  
29  
30  
31  
32  
33  
34  
35  
36  
37  
38  
39  
40  
41  
42  
43  
44  
45  
46  
47

|  |                                                                                            |  |                                                                                                                                                                                        |  |  |                                                                                                                                                                                                                                                                                       |  |
|--|--------------------------------------------------------------------------------------------|--|----------------------------------------------------------------------------------------------------------------------------------------------------------------------------------------|--|--|---------------------------------------------------------------------------------------------------------------------------------------------------------------------------------------------------------------------------------------------------------------------------------------|--|
|  | <p>treatment across the states of Maharashtra and Andhra Pradesh from 2004–05 to 2012.</p> |  | <p>Pradesh = 2004: 1824, 2012: 3715; Maharashtra= 2004: 2664, 2012: 5038. Total HHs surveyed (rural): Andhra Pradesh = 2004: 3235, 2012: 4908; Maharashtra= 2004: 2650, 2012: 5035</p> |  |  | <p>[average OOPE for IP care per individual within 1 year of the survey] - Expenditure on high-cost treatments [average OOPE for IP care within 1 year of the survey for both public and private hospitals per episode of cardiac &amp; nephrology treatments, which were used as</p> |  |
|--|--------------------------------------------------------------------------------------------|--|----------------------------------------------------------------------------------------------------------------------------------------------------------------------------------------|--|--|---------------------------------------------------------------------------------------------------------------------------------------------------------------------------------------------------------------------------------------------------------------------------------------|--|

|                                                                                                                                              |                                                                                                                                                            |                                                                       |                                                                                                   |                                                                                                               |                                               |                                                                                                                                                                   |                                                                                                                                                  |
|----------------------------------------------------------------------------------------------------------------------------------------------|------------------------------------------------------------------------------------------------------------------------------------------------------------|-----------------------------------------------------------------------|---------------------------------------------------------------------------------------------------|---------------------------------------------------------------------------------------------------------------|-----------------------------------------------|-------------------------------------------------------------------------------------------------------------------------------------------------------------------|--------------------------------------------------------------------------------------------------------------------------------------------------|
|                                                                                                                                              |                                                                                                                                                            |                                                                       |                                                                                                   |                                                                                                               |                                               | proxies for high-cost treatments.]<br><br>-Efficiency:<br><br>duration of hospital stay in days                                                                   |                                                                                                                                                  |
| 17<br>18<br>19<br>20<br>21<br>22<br>23<br>24<br>25<br>26<br>27<br>28<br>29<br>30<br>31<br>32<br>33<br>34<br>35<br>36<br>37<br>38<br>39<br>40 | Khetrupal and Acharya, 2019<br><br>To examine the scheme design and the incentive structure under RSBY and its implications for delivering health services | Patiala and Yamunanagar districts in the states of Punjab and Haryana | <b>Quantitative:</b><br>Total sample participants n=751<br>selected from RSBY empaneled hospitals | RSBY Introduced in 2008 by the Ministry of Labour and Employment, Government of India; to provide HI coverage | Enrolment in health insurance via RSBY scheme | A) Gaps in the scheme categorized by:<br><br>1. Allocation of roles and responsibilities<br><br>2. Enrolment of beneficiaries<br><br>3. Empanelment of facilities | Mixed method study<br><br>Quantitative (Exit interviews)<br><br>Qualitative (in depth interviews of stakeholders)<br><br>Secondary data analysis |

1  
2  
3  
4  
5  
6  
7  
8  
9  
10  
11  
12  
13  
14  
15  
16  
17  
18  
19  
20  
21  
22  
23  
24  
25  
26  
27  
28  
29  
30  
31  
32  
33  
34  
35  
36  
37  
38  
39  
40  
41  
42  
43  
44  
45  
46  
47

|  |                                |  |                                                                                                                                                                                 |                       |  |                                                                                                      |  |
|--|--------------------------------|--|---------------------------------------------------------------------------------------------------------------------------------------------------------------------------------|-----------------------|--|------------------------------------------------------------------------------------------------------|--|
|  | to the intended beneficiaries. |  | -RSBY participants=387<br>-Non RSBY participants=364<br><br><b>Qualitative:</b><br>20 Key stakeholders' interviews of RSBY i.e., policy makers, representative s from insurance | to people living BPL. |  | 4. Monitoring and supervision,<br>5. Package rates.<br><br>B) OOPE of RSBY and non-RSBY participants |  |
|--|--------------------------------|--|---------------------------------------------------------------------------------------------------------------------------------------------------------------------------------|-----------------------|--|------------------------------------------------------------------------------------------------------|--|

|                                                |                                                                                                                                                      |          |                                                                                |                          |                          |                                       |                                                                          |
|------------------------------------------------|------------------------------------------------------------------------------------------------------------------------------------------------------|----------|--------------------------------------------------------------------------------|--------------------------|--------------------------|---------------------------------------|--------------------------------------------------------------------------|
|                                                |                                                                                                                                                      |          | companies,<br>state<br>representative<br>s, public and<br>private<br>providers |                          |                          |                                       |                                                                          |
| Mahapatra<br>o, Singh<br>and<br>Singh,<br>2018 | To understand<br>the impact of<br>HI schemes on<br>tackling the<br>economic<br>burden of<br>OOPE and its<br>effectiveness<br>in reducing<br>economic | National | NSSO 2014<br>data                                                              | Government HI<br>schemes | Enrolment in PFHI scheme | Healthcare<br>utilization and<br>OOPE | NSSO data, 71 <sup>st</sup> round<br>in 2014, secondary<br>data analysis |

1  
2  
3  
4  
5  
6  
7  
8  
9  
10  
11  
12  
13  
14  
15  
16  
17  
18  
19  
20  
21  
22  
23  
24  
25  
26  
27  
28  
29  
30  
31  
32  
33  
34  
35  
36  
37  
38  
39  
40  
41  
42  
43  
44  
45  
46  
47

|                                |                                                                                                                |                               |                                                                                     |                                     |                          |                                                                                                   |                                                                                                                                          |
|--------------------------------|----------------------------------------------------------------------------------------------------------------|-------------------------------|-------------------------------------------------------------------------------------|-------------------------------------|--------------------------|---------------------------------------------------------------------------------------------------|------------------------------------------------------------------------------------------------------------------------------------------|
|                                | inequalities in healthcare spending                                                                            |                               |                                                                                     |                                     |                          |                                                                                                   |                                                                                                                                          |
| Nandi, Schneider & Dixit, 2017 | To examine enrolment, utilization (public and private) and OOPE for the insured and uninsured, in Chhattisgarh | Chhattisgarh, India           | Included 1205 HHs and 6026 individuals (HH members), HHs as the second-stage units. | Government Health insurance schemes | Enrolment in RSBY scheme | -Determinants of enrolment<br>-Healthcare utilization<br>-OOPE<br>-Increased hospitalization rate | Secondary analysis of 25 <sup>th</sup> Schedule of the 71st round of the cross-sectional Indian NSSO data between January and June 2014. |
| Philip, Kannan & Sharma, 2016  | 1. To compare the sociodemographic                                                                             | Trivandrum district of Kerala | n= 149 insured and 147 uninsured BPL HHs                                            | CHIS                                | Enrolment in CHIS        | 1. Coverage of CHIS<br>2. Healthcare utilization,                                                 | Cross-sectional survey in 2011                                                                                                           |

1  
2  
3  
4  
5  
6  
7  
8  
9  
10  
11  
12  
13  
14  
15  
16  
17  
18  
19  
20  
21  
22  
23  
24  
25  
26  
27  
28  
29  
30  
31  
32  
33  
34  
35  
36  
37  
38  
39  
40  
41  
42  
43  
44  
45  
46  
47

|                                                                                                                                                                                           |  |                                                                                                      |  |  |                                                                                                                                                                  |  |
|-------------------------------------------------------------------------------------------------------------------------------------------------------------------------------------------|--|------------------------------------------------------------------------------------------------------|--|--|------------------------------------------------------------------------------------------------------------------------------------------------------------------|--|
| <p>hic &amp; health utilization pattern (OP and IP services) of BPL HHs insured in comprehensive health insurance scheme (CHIS). 2. To find the correlates of insurance status and IP</p> |  | <p>with 667 and 578 members, respectively. Age: 33.0 ± 18.2 years; HH size was 4.2 ± 1.8 members</p> |  |  | <p>3. OOPE associated with IP service<br/>4. Factors: Socio-demographics, understanding regarding insurance, type of insurance aware of, information on RSBY</p> |  |
|-------------------------------------------------------------------------------------------------------------------------------------------------------------------------------------------|--|------------------------------------------------------------------------------------------------------|--|--|------------------------------------------------------------------------------------------------------------------------------------------------------------------|--|

1  
2  
3  
4  
5  
6  
7  
8  
9  
10  
11  
12  
13  
14  
15  
16  
17  
18  
19  
20  
21  
22  
23  
24  
25  
26  
27  
28  
29  
30  
31  
32  
33  
34  
35  
36  
37  
38  
39  
40  
41  
42  
43  
44  
45  
46  
47

|                     |                                                                                                                                    |          |                                                                                                                                 |      |              |                                                                                                                                                      |                                                                                                                    |
|---------------------|------------------------------------------------------------------------------------------------------------------------------------|----------|---------------------------------------------------------------------------------------------------------------------------------|------|--------------|------------------------------------------------------------------------------------------------------------------------------------------------------|--------------------------------------------------------------------------------------------------------------------|
|                     | service utilization. 3. To examine the OOPE for IP services                                                                        |          |                                                                                                                                 |      |              |                                                                                                                                                      |                                                                                                                    |
| Ranjan et al., 2018 | To discuss a) the coverage & effectiveness of both governments purchasing through insurance and government provision of tax-funded | National | A total of 65,932 HHs (rural: 36480, urban: 29452) were surveyed for the entire Indian Union, which included a total of 333,104 | PFHI | PFHI schemes | 1. OOPE, CHE<br>2. Choice of provider.<br>3. HI coverage, type.<br>3. Equity in PFHI coverage<br>4. Impoverishment effect of OOPE on hospitalization | Unit records of the “Social Consumption: Health” survey (71st round) conducted by the NSSO in January to June 2014 |

1  
2  
3  
4  
5  
6  
7  
8  
9  
10  
11  
12  
13  
14  
15  
16  
17  
18  
19  
20  
21  
22  
23  
24  
25  
26  
27  
28  
29  
30  
31  
32  
33  
34  
35  
36  
37  
38  
39  
40  
41  
42  
43  
44  
45  
46  
47

|  |                                                                                                                                                                                           |  |                                                                                  |  |  |                                                                          |  |
|--|-------------------------------------------------------------------------------------------------------------------------------------------------------------------------------------------|--|----------------------------------------------------------------------------------|--|--|--------------------------------------------------------------------------|--|
|  | <p>free or subsidized care as strategies of financial protection; b) the contribution that PFHI makes to the reduction in CHE due to hospitalization; and c) the equity dimensions of</p> |  | <p>individuals (rural: 189573, urban: 143531; male: 168697 females: 164407).</p> |  |  | <p>5. Factors: Socio-economic<br/>6. Increased hospitalization rates</p> |  |
|--|-------------------------------------------------------------------------------------------------------------------------------------------------------------------------------------------|--|----------------------------------------------------------------------------------|--|--|--------------------------------------------------------------------------|--|



1  
2  
3  
4  
5  
6  
7  
8  
9  
10  
11  
12  
13  
14  
15  
16  
17  
18  
19  
20  
21  
22  
23  
24  
25  
26  
27  
28  
29  
30  
31  
32  
33  
34  
35  
36  
37  
38  
39  
40  
41  
42  
43  
44  
45  
46  
47

|                  |                                                                                                                                                          |                                |                                               |                                                                             |                                                                                                                                                                                                                                                                                           |                                                                                                                                                                 |                                                                                                                                                                                                      |
|------------------|----------------------------------------------------------------------------------------------------------------------------------------------------------|--------------------------------|-----------------------------------------------|-----------------------------------------------------------------------------|-------------------------------------------------------------------------------------------------------------------------------------------------------------------------------------------------------------------------------------------------------------------------------------------|-----------------------------------------------------------------------------------------------------------------------------------------------------------------|------------------------------------------------------------------------------------------------------------------------------------------------------------------------------------------------------|
|                  | both financial protection strategies.                                                                                                                    |                                |                                               |                                                                             |                                                                                                                                                                                                                                                                                           |                                                                                                                                                                 |                                                                                                                                                                                                      |
| Rao et al., 2014 | To compare the effects of health innovations over time on access to and OOPE on IP care in Andhra Pradesh & Maharashtra and to assess whether the Andhra | Andhra Pradesh and Maharashtra | Survey of 18 696 HHs across 2 states and 1871 | i. RAS Health Insurance Scheme of Andhra Pradesh<br>ii. RSBY in Maharashtra | Enrolment in RAS or RSBY<br>Effect of i. RAS HI Scheme of Andhra Pradesh launched in 2007 to provide treatment for serious and life threatening illnesses. Families with BPL card are automatically enrolled. Enrollees make no contribution, the annual benefit is a maximum of (INR 200 | 1. Average IP expenditure per HH per year, 2. Large OOP IP expenditure,<br>3. Large borrowing<br>4. Hospitalization rate<br>5. Factors: Setting, socio-economic | Secondary data analysis: Repeated measures survey (Pre-post) using difference-in-difference (DID).<br>Baseline: NSSO 60th decennial round HH survey undertaken in 2004.<br>Follow up survey: in 2012 |

1  
2  
3  
4  
5  
6  
7  
8  
9  
10  
11  
12  
13  
14  
15  
16  
17  
18  
19  
20  
21  
22  
23  
24  
25  
26  
27  
28  
29  
30  
31  
32  
33  
34  
35  
36  
37  
38  
39  
40  
41  
42  
43  
44  
45  
46  
47

|  |                                                                                                                                                                     |  |  |  |                                                                                                                                                                                                                                                                                                                                                                                                                                                                          |  |  |
|--|---------------------------------------------------------------------------------------------------------------------------------------------------------------------|--|--|--|--------------------------------------------------------------------------------------------------------------------------------------------------------------------------------------------------------------------------------------------------------------------------------------------------------------------------------------------------------------------------------------------------------------------------------------------------------------------------|--|--|
|  | <p>Pradesh<br/><br/>initiatives<br/><br/>had larger or<br/><br/>smaller<br/><br/>beneficial<br/><br/>effects than<br/><br/>those found in<br/><br/>Maharashtra.</p> |  |  |  | <p>000) per family per year<br/><br/>and there is no limit on the<br/><br/>size of the family.<br/><br/>ii. RSBY in Maharashtra<br/><br/>launched in 2008<br/><br/>(enrolment began in 2009)<br/><br/>and provides access to free<br/><br/>IP hospital care up to (INR<br/><br/>30 000) per<br/><br/>family per year. HHs pay<br/><br/>contribution of INR 30 for<br/><br/>registration and annual<br/><br/>renewal. Up to five family<br/><br/>members are covered.</p> |  |  |
|--|---------------------------------------------------------------------------------------------------------------------------------------------------------------------|--|--|--|--------------------------------------------------------------------------------------------------------------------------------------------------------------------------------------------------------------------------------------------------------------------------------------------------------------------------------------------------------------------------------------------------------------------------------------------------------------------------|--|--|

1  
2  
3  
4  
5  
6  
7  
8  
9  
10  
11  
12  
13  
14  
15  
16  
17  
18  
19  
20  
21  
22  
23  
24  
25  
26  
27  
28  
29  
30  
31  
32  
33  
34  
35  
36  
37  
38  
39  
40  
41  
42  
43  
44  
45  
46  
47

|                        |                                                                                                |          |                                                                                                                                                                              |                                                               |                        |                                                                                                                                               |                                                               |
|------------------------|------------------------------------------------------------------------------------------------|----------|------------------------------------------------------------------------------------------------------------------------------------------------------------------------------|---------------------------------------------------------------|------------------------|-----------------------------------------------------------------------------------------------------------------------------------------------|---------------------------------------------------------------|
| Ravi & Bergkvist, 2014 | To analyze the impact of PFHI viz. RSBY and different state-sponsored health insurance schemes | National | Districts where the PFHI schemes were implemented For RSBY impact: The districts were divided into two samples (1) where the scheme was implemented before July 2010 (end of | Different PFHI schemes including RSBY and state level schemes | Different PFHI schemes | Financial protection<br>1) Overall impoverishment<br>-hospitalization<br>-OOPE<br>-Outpatient<br>-Drugs<br>2) CHE-40%<br>3) Poverty gap index | Secondary data<br>Analysis of a cross-sectional survey (NSSO) |
|------------------------|------------------------------------------------------------------------------------------------|----------|------------------------------------------------------------------------------------------------------------------------------------------------------------------------------|---------------------------------------------------------------|------------------------|-----------------------------------------------------------------------------------------------------------------------------------------------|---------------------------------------------------------------|

|                                         |                                                                                     |                                                                                           |                                                                                                                              |      |                   |                                                                                                    |                                                                                                                      |
|-----------------------------------------|-------------------------------------------------------------------------------------|-------------------------------------------------------------------------------------------|------------------------------------------------------------------------------------------------------------------------------|------|-------------------|----------------------------------------------------------------------------------------------------|----------------------------------------------------------------------------------------------------------------------|
|                                         |                                                                                     |                                                                                           | NSSO survey)<br>and (2) where<br>the scheme<br>was<br>implemented<br>before July<br>2009<br>(beginning of<br>NSSO<br>survey) |      |                   |                                                                                                    |                                                                                                                      |
| Raza, van<br>de Poel,<br>Panda,<br>2016 | 1. To analyze<br>HH level<br>determinants<br>of RSBY<br>enrolment<br>using HH level | Kanpur Dehat<br>& Pratapgarh<br>districts in<br>Uttar Pradesh<br>and Vaishali<br>in Bihar | Self-help<br>group (SHG)<br>members or<br>head of the<br>HHs. Baseline<br>survey: March                                      | RSBY | Enrolment in RSBY | 1. Determinants of<br>enrolment in health<br>insurance<br>2. Determinants of<br>re-enrolment in HI | Secondary data<br>analysis of the data<br>collected in 2012-2013<br>as a part of an<br>evaluation of CBHI<br>schemes |

1  
2  
3  
4  
5  
6  
7  
8  
9  
10  
11  
12  
13  
14  
15  
16  
17  
18  
19  
20  
21  
22  
23  
24  
25  
26  
27  
28  
29  
30  
31  
32  
33  
34  
35  
36  
37  
38  
39  
40  
41  
42  
43  
44  
45  
46  
47

|  |                                                                                                                                                                                                                       |  |                                                                                                                |  |  |                                                  |  |
|--|-----------------------------------------------------------------------------------------------------------------------------------------------------------------------------------------------------------------------|--|----------------------------------------------------------------------------------------------------------------|--|--|--------------------------------------------------|--|
|  | <p>panel data collected in 2012 &amp; 2013</p> <p>2. To investigate the determinants of dropping out of the scheme.</p> <p>3. To investigate whether RSBY membership is associated with increased use of hospital</p> |  | <p>and May 2010 (3,686 HHs) and follow-up survey: March and April in 2012 (3,318 HHs) and 2013 (3307 HHs).</p> |  |  | <p>3. Hospital care and financial protection</p> |  |
|--|-----------------------------------------------------------------------------------------------------------------------------------------------------------------------------------------------------------------------|--|----------------------------------------------------------------------------------------------------------------|--|--|--------------------------------------------------|--|

|                        |                                                                                                                                                                 |                               |                                          |      |                                                                                                                                                                                                                                                      |      |                                                            |
|------------------------|-----------------------------------------------------------------------------------------------------------------------------------------------------------------|-------------------------------|------------------------------------------|------|------------------------------------------------------------------------------------------------------------------------------------------------------------------------------------------------------------------------------------------------------|------|------------------------------------------------------------|
|                        | care and financial protection.                                                                                                                                  |                               |                                          |      |                                                                                                                                                                                                                                                      |      |                                                            |
| Sabharwal et al., 2014 | To analyze the effects of RSBY on socially excluded HHs (focusing on Scheduled Castes (SC), Muslims and upper caste poor) in two states in India: Uttar Pradesh | Uttar Pradesh and Maharashtra | Sample size was 1500,750 from each state | RSBY | <b>Target group:</b> SC, Muslim and upper caste poor HHs who were beneficiaries of RSBY (whether they have used the smart card or not)<br><br><b>Control group:</b> SC, Muslim and upper caste poor HHs who were eligible for RSBY but not enrolled. | OOPE | Quasi experimental mixed methods study, April to July 2012 |

1  
2  
3  
4  
5  
6  
7  
8  
9  
10  
11  
12  
13  
14  
15  
16  
17  
18  
19  
20  
21  
22  
23  
24  
25  
26  
27  
28  
29  
30  
31  
32  
33  
34  
35  
36  
37  
38  
39  
40  
41  
42  
43  
44  
45  
46  
47

|                             |                                                                                              |          |                                                                                                                                         |                                         |                                                                                                                                                                                                                                              |                                                                                                                                                                                                  |                                                                                                            |
|-----------------------------|----------------------------------------------------------------------------------------------|----------|-----------------------------------------------------------------------------------------------------------------------------------------|-----------------------------------------|----------------------------------------------------------------------------------------------------------------------------------------------------------------------------------------------------------------------------------------------|--------------------------------------------------------------------------------------------------------------------------------------------------------------------------------------------------|------------------------------------------------------------------------------------------------------------|
|                             | and<br>Maharashtra                                                                           |          |                                                                                                                                         |                                         |                                                                                                                                                                                                                                              |                                                                                                                                                                                                  |                                                                                                            |
| Selvaraj,<br>Karan,<br>2012 | To capture the impact, if any, of the PFHI programmes on financial risk protection in India. | National | NSSO data of 2003-04 as pre-intervention and 2009-10 as post intervention. HHs in 2004-05 were 1,24,644 (79,298 rural and 45,346 urban) | RSBY and state health insurance schemes | RSBY and other state insurances implemented in gradually from 2007 to 2009.<br><b>RSBY:</b> 247 districts; <b>State insurance:</b> 74 districts (Andhra Pradesh n=23, Karnataka n=22 and Tamil Nadu n=29); and <b>control:</b> 291 districts | -OOP spending (IP, OP, total OOP and drug expenditure), its trends and patterns.<br>-Change in OOP expenditure due to HI<br>-Trends in catastrophic payments<br>Recall period: non institutional | Pre (2003-04)-post (2009-10) study and Case-control approach based on secondary data analysis of NSSO data |

1  
2  
3  
4  
5  
6  
7  
8  
9  
10  
11  
12  
13  
14  
15  
16  
17  
18  
19  
20  
21  
22  
23  
24  
25  
26  
27  
28  
29  
30  
31  
32  
33  
34  
35  
36  
37  
38  
39  
40  
41  
42  
43  
44  
45  
46  
47

|  |  |  |                                                                                  |  |  |                                                                                                                                                                                                                                                      |  |
|--|--|--|----------------------------------------------------------------------------------|--|--|------------------------------------------------------------------------------------------------------------------------------------------------------------------------------------------------------------------------------------------------------|--|
|  |  |  | and 1,00,855<br>HHs (59,119<br>rural and<br>41,736 urban)<br>during 2009-<br>10. |  |  | medical expenses:<br>30 day.<br>Institutional health<br>spending: 365 days<br>recall.<br>Total OOP:<br>summation of IP<br>and OP expenses.<br>Catastrophic<br>headcount: No. of<br>HHs making<br>OOPE greater than<br>10% of total HH<br>expenditure |  |
|--|--|--|----------------------------------------------------------------------------------|--|--|------------------------------------------------------------------------------------------------------------------------------------------------------------------------------------------------------------------------------------------------------|--|



1  
2  
3  
4  
5  
6  
7  
8  
9  
10  
11  
12  
13  
14  
15  
16  
17  
18  
19  
20  
21  
22  
23  
24  
25  
26  
27  
28  
29  
30  
31  
32  
33  
34  
35  
36  
37  
38  
39  
40  
41  
42  
43  
44  
45  
46  
47

|                |                                                                                                                                                                             |           |                                                                                                                                                                    |      |                                                               |                                |                                            |
|----------------|-----------------------------------------------------------------------------------------------------------------------------------------------------------------------------|-----------|--------------------------------------------------------------------------------------------------------------------------------------------------------------------|------|---------------------------------------------------------------|--------------------------------|--------------------------------------------|
| Sinha,<br>2018 | To assess whether RSBY had improved care- seeking and reduced incidences of CHE and health expenditure-induced poverty among the insured population. To explore whether the | Jharkhand | A matched controlled cross-sectional study was conducted in two purposively selected administrative blocks, namely Silli and Bundu of Ranchi district in Jharkhand | RSBY | Enrolment in RSBY<br>Total 1643 HHs<br>873 RSBY, 770 Non-RSBY | Healthcare utilization and CHE | A matched controlled cross-sectional study |
|----------------|-----------------------------------------------------------------------------------------------------------------------------------------------------------------------------|-----------|--------------------------------------------------------------------------------------------------------------------------------------------------------------------|------|---------------------------------------------------------------|--------------------------------|--------------------------------------------|

|                     |                                                                                                                                                                          |                  |                                  |                                     |                                                                                                                                                                                                                 |                                                                                                                |                                                               |
|---------------------|--------------------------------------------------------------------------------------------------------------------------------------------------------------------------|------------------|----------------------------------|-------------------------------------|-----------------------------------------------------------------------------------------------------------------------------------------------------------------------------------------------------------------|----------------------------------------------------------------------------------------------------------------|---------------------------------------------------------------|
|                     | benefits were equitable.                                                                                                                                                 |                  | between April to June 2014       |                                     |                                                                                                                                                                                                                 |                                                                                                                |                                                               |
| Sood & Wagner, 2016 | To evaluate the effects of a government insurance programme covering tertiary care for the poor in Karnataka, India—VAS—on treatment seeking and postoperative outcomes. | Karnataka, India | 572 villages in Karnataka, India | A government insurance program: VAS | 31 476 HHs (22796 BPL and 8680 above poverty line (APL) in 300 villages where the scheme was implemented and 28 633 HHs (21767 BPL and 6866 APL) in 272 neighboring matched villages ineligible for the scheme. | 1) Treatment seeking behavior<br>2) Post-operative wellbeing<br>3) Post-operative infections and re-admissions | A quasi- experimental design<br>February 2010 to August 2012. |

1  
2  
3  
4  
5  
6  
7  
8  
9  
10  
11  
12  
13  
14  
15  
16  
17  
18  
19  
20  
21  
22  
23  
24  
25  
26  
27  
28  
29  
30  
31  
32  
33  
34  
35  
36  
37  
38  
39  
40  
41  
42  
43  
44  
45  
46  
47

|                   |                                                                                                                                                            |                  |                                  |                                     |                                                                                                                                                                                               |                                    |                                                              |
|-------------------|------------------------------------------------------------------------------------------------------------------------------------------------------------|------------------|----------------------------------|-------------------------------------|-----------------------------------------------------------------------------------------------------------------------------------------------------------------------------------------------|------------------------------------|--------------------------------------------------------------|
| Sood et al., 2014 | To evaluate the effects of a government insurance program covering tertiary care for people BPL in Karnataka, India, on OOPE, hospital use, and mortality. | Karnataka, India | 572 villages in Karnataka, India | A government insurance program: VAS | 31 476 HHs (22 796 BPL and 8680 APL) in 300 villages where the scheme was implemented and 28 633 HHs (21 767 BPL and 6866 APL) in 272 neighboring matched villages ineligible for the scheme. | OOPE, hospital use, and mortality. | Quasi- randomized trial<br><br>February 2010 to August 2012. |
|-------------------|------------------------------------------------------------------------------------------------------------------------------------------------------------|------------------|----------------------------------|-------------------------------------|-----------------------------------------------------------------------------------------------------------------------------------------------------------------------------------------------|------------------------------------|--------------------------------------------------------------|

|                                                                                                                                                                                                                                                                                                                                                                   |                                                                                                              |                 |                                                                                                                                                                |                                                                  |                                                            |                                                                                               |                                               |
|-------------------------------------------------------------------------------------------------------------------------------------------------------------------------------------------------------------------------------------------------------------------------------------------------------------------------------------------------------------------|--------------------------------------------------------------------------------------------------------------|-----------------|----------------------------------------------------------------------------------------------------------------------------------------------------------------|------------------------------------------------------------------|------------------------------------------------------------|-----------------------------------------------------------------------------------------------|-----------------------------------------------|
| <p>1<br/>2<br/>3<br/>4<br/>5<br/>6<br/>7<br/>8<br/>9<br/>10<br/>11<br/>12<br/>13<br/>14<br/>15<br/>16<br/>17<br/>18<br/>19<br/>20<br/>21<br/>22<br/>23<br/>24<br/>25<br/>26<br/>27<br/>28<br/>29<br/>30<br/>31<br/>32<br/>33<br/>34<br/>35<br/>36<br/>37<br/>38<br/>39<br/>40<br/>41<br/>42<br/>43<br/>44<br/>45<br/>46<br/>47</p> <p>Sriram &amp; Khan, 2020</p> | <p>To estimate the effect of public HI programs for the poor on hospitalization s and OOP IP care costs.</p> | <p>National</p> | <p>NSS 71st round data was used n= 64270 poor individuals. -9.55% were enrolled in any PFHI - 41.3% of the poor were illiterate - 80.6% belonged to Hindu;</p> | <p>PFHI such as RSBY, ESIS, CGHS, and other state insurances</p> | <p>Treatment=enrolled HHs<br/>Control=non-enrolled HHs</p> | <p>Incidence of hospitalizations, length of hospitalization, and OOP payments for IP care</p> | <p>Cross sectional study (NSSO data 2014)</p> |
|-------------------------------------------------------------------------------------------------------------------------------------------------------------------------------------------------------------------------------------------------------------------------------------------------------------------------------------------------------------------|--------------------------------------------------------------------------------------------------------------|-----------------|----------------------------------------------------------------------------------------------------------------------------------------------------------------|------------------------------------------------------------------|------------------------------------------------------------|-----------------------------------------------------------------------------------------------|-----------------------------------------------|

1  
2  
3  
4  
5  
6  
7  
8  
9  
10  
11  
12  
13  
14  
15  
16  
17  
18  
19  
20  
21  
22  
23  
24  
25  
26  
27  
28  
29  
30  
31  
32  
33  
34  
35  
36  
37  
38  
39  
40  
41  
42  
43  
44  
45  
46  
47

|  |  |  |                                                                                                                                                                               |  |  |  |  |
|--|--|--|-------------------------------------------------------------------------------------------------------------------------------------------------------------------------------|--|--|--|--|
|  |  |  | -85.1% were<br>from the<br>disadvantaged<br>classes;<br>-64.2%<br>belonged to<br>medium<br>sized HHs (5<br>to 8<br>members)<br>-2.5%<br>suffering from<br>chronic<br>diseases |  |  |  |  |
|--|--|--|-------------------------------------------------------------------------------------------------------------------------------------------------------------------------------|--|--|--|--|

|                                  |                                                                                                                                  |                                                                                                         |                                                                                                                        |                                                           |                   |                                                                                                                                                                         |                        |
|----------------------------------|----------------------------------------------------------------------------------------------------------------------------------|---------------------------------------------------------------------------------------------------------|------------------------------------------------------------------------------------------------------------------------|-----------------------------------------------------------|-------------------|-------------------------------------------------------------------------------------------------------------------------------------------------------------------------|------------------------|
|                                  |                                                                                                                                  |                                                                                                         | - mean age of the poor population was 25.3 years.                                                                      |                                                           |                   |                                                                                                                                                                         |                        |
| Vellakkal, Juyal and Mehdi, 2012 | To assess the overall satisfaction of beneficiaries with the schemes based on self-reported patient satisfaction, willingness to | Twelve cities=Bhubaneswar, Thiruvananthapuram, Ahmedabad, Chandigarh, Meerut, Patna, Jabalpur, Lucknow, | n= 1,204 principal beneficiaries of CGHS and 640 of ECHS, 100 empaneled private healthcare providers and 100 CGHS-ECHS | CGHS and Ex-service men Contributory Health Scheme (ECHS) | Enrolment in RSBY | 1. Self-reported patient satisfaction<br>- Accessibility<br>- Environment<br>- Behavior of doctors<br>- Behavior of other staff<br>2. WTP for better quality healthcare | Cross-sectional survey |

1  
2  
3  
4  
5  
6  
7  
8  
9  
10  
11  
12  
13  
14  
15  
16  
17  
18  
19  
20  
21  
22  
23  
24  
25  
26  
27  
28  
29  
30  
31  
32  
33  
34  
35  
36  
37  
38  
39  
40  
41  
42  
43  
44  
45  
46  
47

|                                                                                                                                                                                                                                                                   |                                                         |                                                                                                                                  |  |  |                                                                                                                                                                     |  |
|-------------------------------------------------------------------------------------------------------------------------------------------------------------------------------------------------------------------------------------------------------------------|---------------------------------------------------------|----------------------------------------------------------------------------------------------------------------------------------|--|--|---------------------------------------------------------------------------------------------------------------------------------------------------------------------|--|
| <p>pay (WTP) for<br/>better<br/>healthcare<br/>services and<br/>measuring the<br/>comprehensive<br/>ness of the<br/>schemes in<br/>terms of its<br/>ability to<br/>reduce the<br/>financial<br/>burden of<br/>healthcare<br/>expenditure on<br/>beneficiaries</p> | <p>Hyderabad,<br/>Kolkata,<br/>Mumbai and<br/>Delhi</p> | <p>officials<br/>consisting of<br/>city and<br/>dispensary<br/>level heads of<br/>CGHS and<br/>ECHS across<br/>the 12 cities</p> |  |  | <p>3.Ability of the<br/>scheme to reduce<br/>financial burden of<br/>healthcare<br/>expenditure<br/>4. Factors affecting<br/>level of satisfaction,<br/>and WTP</p> |  |
|-------------------------------------------------------------------------------------------------------------------------------------------------------------------------------------------------------------------------------------------------------------------|---------------------------------------------------------|----------------------------------------------------------------------------------------------------------------------------------|--|--|---------------------------------------------------------------------------------------------------------------------------------------------------------------------|--|

Review only

1  
2  
3 APL: Above Poverty Line; ATT: Average Treatment impact of Treatment on Treated; BPL: Below Poverty Line; CHE: Catastrophic  
4 Health Expenditure; CHIS: Comprehensive Health Insurance Scheme; CGHS: Central Government Health Scheme; DID: Difference-in-  
5 difference; ESIS: Employee State Insurance Scheme; HHs: Households; HI: Health Insurance; INR: Indian National Rupees; IP: Inpatient;  
6  
7  
8 NA: Not Applicable; NSSO: National Sample Survey Office; OOP: Out-of-Pocket; OOPE: Out-of-Pocket expenditure; OP: Out Patient; PFHI:  
9  
10 Public Funded Health Insurance; PMJAY: Prime Minister Jan Arogya Yojana; RSBY: Rasthriya Swasthy Bima Yojana; RAS: Rajiv Arogya  
11  
12 Shree; SHG: Self-Help Group; SPEC: Social, Political, Economic and Cultural; SC: Scheduled Caste; ST: Schedule Tribe; VAS: Vajpayee  
13  
14 Arogya Shree; WTP: Willingness to Pay  
15  
16  
17  
18  
19  
20  
21  
22  
23  
24  
25  
26  
27  
28  
29  
30  
31  
32  
33  
34  
35  
36  
37  
38  
39  
40  
41  
42  
43  
44  
45  
46  
47



**Supplementary file 4: Detailed synthesis of findings**

**Table 1: Impact of government funded health insurance on access and utilization of healthcare, financial risk protection and willingness to pay**

| Study author & year                         | Study design and analysis                                                                                          | Data source and methods                                                                                                                                                                                                            | Details of health insurances                                                                                                                                                    | Results                                                                                                                                                                                                                                                                                                                                                                                                                                                         |
|---------------------------------------------|--------------------------------------------------------------------------------------------------------------------|------------------------------------------------------------------------------------------------------------------------------------------------------------------------------------------------------------------------------------|---------------------------------------------------------------------------------------------------------------------------------------------------------------------------------|-----------------------------------------------------------------------------------------------------------------------------------------------------------------------------------------------------------------------------------------------------------------------------------------------------------------------------------------------------------------------------------------------------------------------------------------------------------------|
| <b>Access and utilization of healthcare</b> |                                                                                                                    |                                                                                                                                                                                                                                    |                                                                                                                                                                                 |                                                                                                                                                                                                                                                                                                                                                                                                                                                                 |
| Azam, 2017                                  | Three large- scaled household (HH) surveys: Matching difference-in-difference analysis (MDID) of longitudinal data | Two waves of India Human Development Survey (2011-12) and (2004-2005) and Human Development Profile of India (HDPI) collected in 1993-94. Data from three states I.e. Andhra Pradesh, Karnataka and Tamil Nadu was not considered. | PFHI covered: RSBY The households having RSBY cards were considered as treatment groups and household not having RSBY cards were control groups in an RSBY implemented district | <b>Rural India</b><br>A) RSBY HHs were 3.2% points (p<0.05; SE=0.014) more likely to report any morbidity. The ATT estimates for percentage change for pre RSBY averages on RSBY household for this variable was reported as 4.84.<br>B) The difference in reporting of morbidity was more defined for long term illnesses as RSBY HHs were 5% points more likely to report any long- term morbidity (p<0.01; SE=0.015). ATT as % change of RSBY HHs was 17.70. |

|  |  |  |  |                                                                                                                                                                                                                                                                                                                                                                                                                                                                                                                                                                                                                                                                                                                                                                                                                                                                                                                                          |
|--|--|--|--|------------------------------------------------------------------------------------------------------------------------------------------------------------------------------------------------------------------------------------------------------------------------------------------------------------------------------------------------------------------------------------------------------------------------------------------------------------------------------------------------------------------------------------------------------------------------------------------------------------------------------------------------------------------------------------------------------------------------------------------------------------------------------------------------------------------------------------------------------------------------------------------------------------------------------------------|
|  |  |  |  | <p>C) RSBY HHs were 3.1% points (<math>p&lt;0.05</math>; <math>SE=0.015</math>) more likely to seek treatment for illnesses. ATT as % change of RSBY HHs was 4.93.</p> <p>D) RSBY HHs were 5.0% points (<math>p&lt;0.05</math>; <math>SE=0.0013</math>) more likely to seek treatment for long term illness than for short term morbidity I.e. 2.3% points (<math>p&gt;0.05</math>; <math>SE=0.013</math>)</p> <p>E) RSBY HHs were 0.7% points (<math>p&gt;0.05</math>; <math>SE=0.007</math>) more likely to report hospitalization in case of long-term morbidity.</p> <p><b>Urban India:</b></p> <p>A) RSBY HHs were 2.4% points (<math>p&gt;0.05</math>; <math>SE=0.026</math>) more likely to report an illness. ATT as % change for RSBY HHs was 0.033.</p> <p>B) RSBY HHs were 2.3% points (<math>p&gt;0.05</math>; <math>SE=0.0028</math>) more likely to report a long-term illness. ATT as % change for RSBY HHs was 7.86.</p> |
|--|--|--|--|------------------------------------------------------------------------------------------------------------------------------------------------------------------------------------------------------------------------------------------------------------------------------------------------------------------------------------------------------------------------------------------------------------------------------------------------------------------------------------------------------------------------------------------------------------------------------------------------------------------------------------------------------------------------------------------------------------------------------------------------------------------------------------------------------------------------------------------------------------------------------------------------------------------------------------------|

1  
2  
3  
4  
5  
6  
7  
8  
9  
10  
11  
12  
13  
14  
15  
16  
17  
18  
19  
20  
21  
22  
23  
24  
25  
26  
27  
28  
29  
30  
31  
32  
33  
34  
35  
36  
37  
38  
39  
40  
41  
42  
43  
44  
45  
46  
47

|                                  |                                                |                                                                                             |                                                                                          |                                                                                                                                                                                                                                                                                                                                                                                                                                                               |
|----------------------------------|------------------------------------------------|---------------------------------------------------------------------------------------------|------------------------------------------------------------------------------------------|---------------------------------------------------------------------------------------------------------------------------------------------------------------------------------------------------------------------------------------------------------------------------------------------------------------------------------------------------------------------------------------------------------------------------------------------------------------|
|                                  |                                                |                                                                                             |                                                                                          | <p>C) RSBY HHs were 2.3% points (p&gt;0.05; SE=0.026) more likely to report any treatment. ATT as % change for RSBY HHs was 3.93.</p> <p>D) RSBY HHs were 1.5% points (p.0.05; SE=5.13) more likely to report treatment for long-term morbidity. ATT as %change for RSBY HHs was 5.13)</p> <p>E) RSBY HHs were 1.6% points (p&gt;0.05; SE=0.014) more likely to report hospitalization for a long-term morbidity. ATT as % change for RSBY HHs was 35.80)</p> |
| <b>Dror &amp; Vellakka, 2012</b> | Analysis of the cross sectional RSBY 2011 data | Main data sources were RSBY website and the planning commission of India official documents | PFHI covered: RSBY RSBY health insurance Comparison with the 2004 utilization indicators | Hospitalization rate for the lowest income group in the country was 1.24 percent in 2004 (according to the NSSO survey), this was juxtaposed with the utilization rate of 2.09 % for RSBY beneficiaries in 2011. On comparison it was a growth rate of 69% was observed, which suggests beneficial results of the RSBY scheme.                                                                                                                                |

|                                                        |                                                                                |                                                                                                                                                                                                                                                                                                                         |                                                                                                                                                                                                                                                                                                                                                  |                                                                                                                                                                                                                                                                                                                                                                                                                                                                                                                                                                                                                                                                                                                                                                                                |
|--------------------------------------------------------|--------------------------------------------------------------------------------|-------------------------------------------------------------------------------------------------------------------------------------------------------------------------------------------------------------------------------------------------------------------------------------------------------------------------|--------------------------------------------------------------------------------------------------------------------------------------------------------------------------------------------------------------------------------------------------------------------------------------------------------------------------------------------------|------------------------------------------------------------------------------------------------------------------------------------------------------------------------------------------------------------------------------------------------------------------------------------------------------------------------------------------------------------------------------------------------------------------------------------------------------------------------------------------------------------------------------------------------------------------------------------------------------------------------------------------------------------------------------------------------------------------------------------------------------------------------------------------------|
| <p><b>Garg, Chowdhury &amp; Sundararaman, 2019</b></p> | <p>Secondary data analysis of the two rounds of NSS cross-sectional survey</p> | <p>The 60<sup>th</sup> round of NSSO (2004) and 71<sup>st</sup> round of NSSO (2014) in three states of Andhra Pradesh, Karnataka and Tamil Nadu. Instrument Variable (IV) method was used in the multivariate analysis. Two-step least square (2sls) for OOPE and Two-step IV Probit model for utilization and CHE</p> | <p>PFHI covered: The three Public Funded Health Insurance (PFHI) Schemes operational in Andhra Pradesh (Rajiv Arogya Shree or the NTR Vaidya Seva); Karnataka (Vajpayee Arogya Shree); Tamil Nadu (Tamil Nadu Chief Minister's Comprehensive Health Insurance Scheme)</p> <p>The pre PFHI in 2004 and post PFHI (2014) comparisons were made</p> | <p><b>A) Proportion of people being hospitalized increased from 2004 to 2014, among both enrolled and non-enrolled members, in all the three states:</b></p> <p><b>Proportion (%) of individuals who utilized hospital care:</b></p> <p><b>Andhra Pradesh</b></p> <p>2004: All the people 2.29 (95% CI=2.09–2.49)</p> <p>2014: All the people 5.58 (95% CI=5.14–6.01); non-insured individuals 5.86 (95% CI=5.18–6.53); PFHI enrolled individuals 5.41 (95% CI=4.84–5.99)</p> <p><b>Karnataka</b></p> <p>2004: All the people 2.23 (95% CI=2.01–2.46)</p> <p>2014: All the people 4.93 (95% CI=4.58–5.28); non-insured individuals 4.88 (95% CI=4.53–5.24); PFHI enrolled individuals 5.76 (95% CI=4.08–7.43)</p> <p><b>Tamil Nadu</b></p> <p>2004: All the people 3.58 (95% CI=3.33–3.83)</p> |
|--------------------------------------------------------|--------------------------------------------------------------------------------|-------------------------------------------------------------------------------------------------------------------------------------------------------------------------------------------------------------------------------------------------------------------------------------------------------------------------|--------------------------------------------------------------------------------------------------------------------------------------------------------------------------------------------------------------------------------------------------------------------------------------------------------------------------------------------------|------------------------------------------------------------------------------------------------------------------------------------------------------------------------------------------------------------------------------------------------------------------------------------------------------------------------------------------------------------------------------------------------------------------------------------------------------------------------------------------------------------------------------------------------------------------------------------------------------------------------------------------------------------------------------------------------------------------------------------------------------------------------------------------------|

1  
2  
3  
4  
5  
6  
7  
8  
9  
10  
11  
12  
13  
14  
15  
16  
17  
18  
19  
20  
21  
22  
23  
24  
25  
26  
27  
28  
29  
30  
31  
32  
33  
34  
35  
36  
37  
38  
39  
40  
41  
42  
43  
44  
45  
46  
47

|  |  |  |  |                                                                                                                                                                                                                                                                                                                                                                                                                                                                                                                                                                                                                                                                            |
|--|--|--|--|----------------------------------------------------------------------------------------------------------------------------------------------------------------------------------------------------------------------------------------------------------------------------------------------------------------------------------------------------------------------------------------------------------------------------------------------------------------------------------------------------------------------------------------------------------------------------------------------------------------------------------------------------------------------------|
|  |  |  |  | <p>2014: All the people 5.68 (95% CI=5.32–6.04); non-insured individuals 5.55 (95% CI=5.16–5.94); PFHI enrolled individuals 6.27 (95%CI=5.38–7.17)</p> <p><b>B) Proportion (%) of hospitalization episodes in private hospitals</b></p> <p><b>Andhra Pradesh</b></p> <p>2004: PFHI enrolled (NA); not enrolled 70 (95% CI=68-72)</p> <p>2014: PFHI enrolled 71 (95%CI=68–73); not enrolled 80 (95%CI=77–82)</p> <p><b>Karnataka</b></p> <p>2004: PFHI enrolled (NA); not enrolled 65 (95%CI=62–67)</p> <p>2014: PFHI enrolled 70 (95%CI=63–76); not enrolled 68 (95%CI=66–70)</p> <p><b>Tamil Nadu</b></p> <p>2004: PFHI enrolled (NA); not enrolled 61 (95% CI=59–63)</p> |
|--|--|--|--|----------------------------------------------------------------------------------------------------------------------------------------------------------------------------------------------------------------------------------------------------------------------------------------------------------------------------------------------------------------------------------------------------------------------------------------------------------------------------------------------------------------------------------------------------------------------------------------------------------------------------------------------------------------------------|

For peer review only

|    |  |  |  |                                                           |
|----|--|--|--|-----------------------------------------------------------|
| 1  |  |  |  | 2014: PFHI enrolled 67 (95% CI=63–70); not enrolled       |
| 2  |  |  |  | 61 (95% CI=59–62)                                         |
| 3  |  |  |  | <b>C) Association of PFHI enrolment and increase in</b>   |
| 4  |  |  |  | <b>hospitalization (utilization) using</b>                |
| 5  |  |  |  | <b>IV Probit regression</b>                               |
| 6  |  |  |  | <b>Andhra Pradesh:</b> coef. -0.085 (SE= 0.526; 95% CI= - |
| 7  |  |  |  | 1.116 to 0.947)                                           |
| 8  |  |  |  | <b>Karnataka:</b> coef. 1.378 (SE= 1.336; 95% CI= -1.242  |
| 9  |  |  |  | to 3.997)                                                 |
| 10 |  |  |  | <b>Tamil Nadu:</b> coef. -0.130(SE= 1.398; 95% CI= -2.871 |
| 11 |  |  |  | to 2.611)                                                 |
| 12 |  |  |  | Enrolment under PFHI was not associated with              |
| 13 |  |  |  | increase in utilization in any of the three states        |
| 14 |  |  |  | <b>D) Association between PFHI enrolment and</b>          |
| 15 |  |  |  | <b>hospitalization or utilization using</b>               |
| 16 |  |  |  | <b>naive Probit model</b>                                 |
| 17 |  |  |  | <b>Andhra Pradesh=</b> -0.025 (p>0.05)                    |
| 18 |  |  |  | <b>Karnataka:</b> 0.191 (p<0.001)                         |
| 19 |  |  |  |                                                           |
| 20 |  |  |  |                                                           |
| 21 |  |  |  |                                                           |
| 22 |  |  |  |                                                           |
| 23 |  |  |  |                                                           |
| 24 |  |  |  |                                                           |
| 25 |  |  |  |                                                           |
| 26 |  |  |  |                                                           |
| 27 |  |  |  |                                                           |
| 28 |  |  |  |                                                           |
| 29 |  |  |  |                                                           |
| 30 |  |  |  |                                                           |
| 31 |  |  |  |                                                           |
| 32 |  |  |  |                                                           |
| 33 |  |  |  |                                                           |
| 34 |  |  |  |                                                           |
| 35 |  |  |  |                                                           |
| 36 |  |  |  |                                                           |
| 37 |  |  |  |                                                           |
| 38 |  |  |  |                                                           |
| 39 |  |  |  |                                                           |
| 40 |  |  |  |                                                           |
| 41 |  |  |  |                                                           |
| 42 |  |  |  |                                                           |
| 43 |  |  |  |                                                           |
| 44 |  |  |  |                                                           |
| 45 |  |  |  |                                                           |
| 46 |  |  |  |                                                           |
| 47 |  |  |  |                                                           |

|                  |                                                                                                                                                                                                                                                     |                                                                                                                                                                                                                                                                                                                                                                                    |                                                                                                                                                          |                                                                                                                                                                                                                                                                                                                                                                                                        |
|------------------|-----------------------------------------------------------------------------------------------------------------------------------------------------------------------------------------------------------------------------------------------------|------------------------------------------------------------------------------------------------------------------------------------------------------------------------------------------------------------------------------------------------------------------------------------------------------------------------------------------------------------------------------------|----------------------------------------------------------------------------------------------------------------------------------------------------------|--------------------------------------------------------------------------------------------------------------------------------------------------------------------------------------------------------------------------------------------------------------------------------------------------------------------------------------------------------------------------------------------------------|
|                  |                                                                                                                                                                                                                                                     |                                                                                                                                                                                                                                                                                                                                                                                    |                                                                                                                                                          | <b>Tamil Nadu:</b> $-0.022$ ( $p>0.05$ )<br><br>Significant association between PFHI enrolment and hospitalizations seen only in Karnataka                                                                                                                                                                                                                                                             |
| <b>Garg 2020</b> | Impact evaluation using NSS survey 2004 when there was no PFHI, and 2014 data (for older PFHI scheme) and primary household survey in 2019 (for data related to the effect of first year of implementing PMJAY) in the state of Chhattisgarh, India | NSS survey data<br><br>Multivariate analysis to see the effect of PMJAY on utilization CHE and OOPE<br><br>OLS model for continuous outcome available and Probit model for binary outcome variable.<br><br>Compared with ATT under Propensity Score Matching or PSM<br><br>Multivariate analysis was repeated for OOPE and CHE using IV approach.<br><br>For OOPE 2sls was applied | PFHI covered: PMJAY scheme introduced in the year 2018.<br><br>The study also mentions other PFHI schemes like MSBY and RSBY operational in Chhattisgarh | The utilization of hospital care did not increase with enrolment under PMJAY or other PFHI schemes in Chhattisgarh.<br><br><b>Proportion (%) of individuals in Chhattisgarh who utilized hospital care</b><br><br>In 2019, PFHI-enrolled= 6.0 (95% CI 5.6–6.5) and PFHI not enrolled 5.7 (95% CI 5.1–6.4)<br><br>In 2014, PFHI-enrolled 3.3 (95% CI 2.6–4.0) and PFHI not enrolled 2.9 (95%CI 2.3–3.4) |

1  
2  
3  
4  
5  
6  
7  
8  
9  
10  
11  
12  
13  
14  
15  
16  
17  
18  
19  
20  
21  
22  
23  
24  
25  
26  
27  
28  
29  
30  
31  
32  
33  
34  
35  
36  
37  
38  
39  
40  
41  
42  
43  
44  
45  
46  
47

|                                |                                                                               |                                                                                                                                                                                                                                                               |                                                                                                                              |                                                                                                                                                                                                                                                                                                                                                                                                                                                                                                                                                              |
|--------------------------------|-------------------------------------------------------------------------------|---------------------------------------------------------------------------------------------------------------------------------------------------------------------------------------------------------------------------------------------------------------|------------------------------------------------------------------------------------------------------------------------------|--------------------------------------------------------------------------------------------------------------------------------------------------------------------------------------------------------------------------------------------------------------------------------------------------------------------------------------------------------------------------------------------------------------------------------------------------------------------------------------------------------------------------------------------------------------|
|                                |                                                                               | as IV model, and for CHE                                                                                                                                                                                                                                      |                                                                                                                              |                                                                                                                                                                                                                                                                                                                                                                                                                                                                                                                                                              |
|                                |                                                                               | two step IV Probit was                                                                                                                                                                                                                                        |                                                                                                                              |                                                                                                                                                                                                                                                                                                                                                                                                                                                                                                                                                              |
|                                |                                                                               | applied                                                                                                                                                                                                                                                       |                                                                                                                              |                                                                                                                                                                                                                                                                                                                                                                                                                                                                                                                                                              |
| <b>Ghosh &amp; Gupta, 2017</b> | Impact evaluation: Coarsened exact matching and, linear and logit regression. | National Sample Survey data: 18 states, which do not have additional state funded insurance (round not reported). States having specific PFHIs, union territories not exposed to RSBY and states not having functional RSBY in the year 2014-15 were excluded | PFHI covered: RSBY<br>Treated group: Household having at least one person enrolled in RSBY. Control: households with no RSBY | 1) The effect of the RSBY on <b>number of outpatient (OP) care</b> was statistically insignificant i.e. sample average treatment effect for the treated (SATT)= -0.012 (p= 0.852).<br><br>2) Impact of RSBY on <b>number of inpatient (IP) care</b> utilization was significant i.e., SATT= 0.109 (p= 0.023).<br>This was approximated as 59% increase when compared to mean inpatient utilization by the uninsured families I.e. (0.186)<br><br>3) No significant impact of RSBY on <b>length of stay at hospitals</b> (in days) i.e., SATT=0.071 (p=0.952) |



1  
2  
3  
4  
5  
6  
7  
8  
9  
10  
11  
12  
13  
14  
15  
16  
17  
18  
19  
20  
21  
22  
23  
24  
25  
26  
27  
28  
29  
30  
31  
32  
33  
34  
35  
36  
37  
38  
39  
40  
41  
42  
43  
44  
45  
46  
47

|                                   |                                                                                                                          |                                                                                                                |                                                                                                                                                                                               |                                                                                                                                                                                                                                                                                                                                                                                                                                                                                                                                                                                                                                                        |
|-----------------------------------|--------------------------------------------------------------------------------------------------------------------------|----------------------------------------------------------------------------------------------------------------|-----------------------------------------------------------------------------------------------------------------------------------------------------------------------------------------------|--------------------------------------------------------------------------------------------------------------------------------------------------------------------------------------------------------------------------------------------------------------------------------------------------------------------------------------------------------------------------------------------------------------------------------------------------------------------------------------------------------------------------------------------------------------------------------------------------------------------------------------------------------|
| <p><b>Katyal et al., 2015</b></p> | <p>A retrospective, longitudinal, controlled quasi-experimental Study (Two large surveys): Difference-in-differences</p> | <p>Pre-post intervention effect: Pre-intervention NSSO 2004 survey and post intervention NSSO 2012 survey.</p> | <p>PFHI covered: RAS and RSBY<br/>No. Of HHs:<br/><b>Intervention 1:</b> RAS of AP in 2004: 0559 and 2012: 8623.<br/><b>Intervention 2:</b> RSBY of MH in 2004: 5314 &amp; in 2012: 10073</p> | <p><b>1) Access to IP care</b> (DID mean (95% CI), p) RAS of AP compared to RSBY of MH:<br/><b>In Private hospitals:</b><br/><b>a) Overall:</b> [Mean DID: 0.076 (-0.012:0.14) p=0.02] AP as compared to MH. Utilization of private hospitals has increased in AP [0.065 (0.018:0.11)] and decreased in MH [-0.011(-0.032:0.053)]<br/><b>b) Place of residence:</b><br/>Urban: The likelihood of admission to a private hospital was significant for hospitalizations among urban households [0.21 (0.095:0.31) p=0.0002] in AP as compared to MH.<br/>Rural: DID=-0.0019 (-0.080:0.076) p=0.96 AP compared to MH.<br/><b>In Public hospitals:</b></p> |
|-----------------------------------|--------------------------------------------------------------------------------------------------------------------------|----------------------------------------------------------------------------------------------------------------|-----------------------------------------------------------------------------------------------------------------------------------------------------------------------------------------------|--------------------------------------------------------------------------------------------------------------------------------------------------------------------------------------------------------------------------------------------------------------------------------------------------------------------------------------------------------------------------------------------------------------------------------------------------------------------------------------------------------------------------------------------------------------------------------------------------------------------------------------------------------|

|  |  |  |  |                                                                                                                                                                                                                                                                                                                                                                                                                                                                                                                                                                                                                                                                                                                                                                                                       |
|--|--|--|--|-------------------------------------------------------------------------------------------------------------------------------------------------------------------------------------------------------------------------------------------------------------------------------------------------------------------------------------------------------------------------------------------------------------------------------------------------------------------------------------------------------------------------------------------------------------------------------------------------------------------------------------------------------------------------------------------------------------------------------------------------------------------------------------------------------|
|  |  |  |  | <p>a) The overall utilization of public facilities has reduced in both the states and more so in AP [-0.075 (-0.14:0.0125), p= 0.019]</p> <p>b) <b>Place of residence:</b></p> <p>Urban: There was an increase in utilization of public facilities in MH [0.067 (-0.062:0.12)] and a reduction in AP [-0.14 (-0.23:-0.047)] for urban HHs and the DID of AP to that of MH is [-0.2 (-0.31:-0.095) p=0.0002].</p> <p>Rural: DID: 0.0019 (-0.076:0.08) p=0.96] AP compared to MH.</p> <p><b>2) Duration (days) of hospital stay:</b></p> <p><b>In Private hospitals:</b></p> <p>DID analysis: an average reduction of 3.2 (-5.4, -1.2) days in AP compared to MH</p> <p>Place of residence: rural HHs [-3.7 (-6.3 :-1) p=0.007]and urban: -1.8 (-4.4:0.8) p=0.17</p> <p><b>In Public hospitals:</b></p> |
|--|--|--|--|-------------------------------------------------------------------------------------------------------------------------------------------------------------------------------------------------------------------------------------------------------------------------------------------------------------------------------------------------------------------------------------------------------------------------------------------------------------------------------------------------------------------------------------------------------------------------------------------------------------------------------------------------------------------------------------------------------------------------------------------------------------------------------------------------------|

1  
2  
3  
4  
5  
6  
7  
8  
9  
10  
11  
12  
13  
14  
15  
16  
17  
18  
19  
20  
21  
22  
23  
24  
25  
26  
27  
28  
29  
30  
31  
32  
33  
34  
35  
36  
37  
38  
39  
40  
41  
42  
43  
44  
45  
46  
47

|                                           |                                                                                                                                         |                                                                                                                                                                                                                            |                                                                                                                                                                                           |                                                                                                                                                                                                                                                                                                                            |
|-------------------------------------------|-----------------------------------------------------------------------------------------------------------------------------------------|----------------------------------------------------------------------------------------------------------------------------------------------------------------------------------------------------------------------------|-------------------------------------------------------------------------------------------------------------------------------------------------------------------------------------------|----------------------------------------------------------------------------------------------------------------------------------------------------------------------------------------------------------------------------------------------------------------------------------------------------------------------------|
|                                           |                                                                                                                                         |                                                                                                                                                                                                                            |                                                                                                                                                                                           | Overall: DID: -2 (-5.1:1.1) p=0.2 AP compared to MH<br><br>Rural: average of reduction of 4.2 days [(-9:0.6) p=0.09] in AP compared to MH.<br><br>Urban: 0.7 (-1.8:3.2) p=0.59 in AP compared to MH.                                                                                                                       |
| <b>Mahapatro, Singh &amp; Singh, 2018</b> | Analysis of the 71 <sup>st</sup> round of cross-sectional household NSS 2014 survey<br><br>Bivariate and multivariate analysis was done | 71 <sup>st</sup> round National Sample Survey, 2014, 'Social Consumption: Health' Schedule 25.0<br><br>-To examine the impact of health insurance on OOP payment, two-part model was used (part 1 logit and part 2 linear) | PFHI covered: Any PFHI scheme<br><br>Information of hospitalization during 365 days was used for the analysis.<br><br>For association comparisons were made between insured and uninsured | <b>1) Inpatient rate by type of health insurance</b><br><br>Government health insurance: lowest economic class: 4% and High economic class 9%<br><br>Other health insurance: lowest economic class: 4.4% and High economic class 6.4%<br><br>No health insurance: lowest economic class: 3.8% and High economic class 6.2% |

|                                                                                                                                                                                                                                                                                                                                                                                     |                                                         |                                                                                                                                                                                                                                                                                                               |                                                                                                             |                                                                                                                                                                                                                                                                                                                                                                                                                                                                                                                                                                                                                                                                  |
|-------------------------------------------------------------------------------------------------------------------------------------------------------------------------------------------------------------------------------------------------------------------------------------------------------------------------------------------------------------------------------------|---------------------------------------------------------|---------------------------------------------------------------------------------------------------------------------------------------------------------------------------------------------------------------------------------------------------------------------------------------------------------------|-------------------------------------------------------------------------------------------------------------|------------------------------------------------------------------------------------------------------------------------------------------------------------------------------------------------------------------------------------------------------------------------------------------------------------------------------------------------------------------------------------------------------------------------------------------------------------------------------------------------------------------------------------------------------------------------------------------------------------------------------------------------------------------|
| <p>1<br/>2<br/>3<br/>4<br/>5<br/>6<br/>7<br/>8<br/>9<br/>10<br/>11<br/>12<br/>13<br/>14<br/>15<br/>16<br/>17<br/>18<br/>19<br/>20<br/>21<br/>22<br/>23<br/>24<br/>25<br/>26<br/>27<br/>28<br/>29<br/>30<br/>31<br/>32<br/>33<br/>34<br/>35<br/>36<br/>37<br/>38<br/>39<br/>40<br/>41<br/>42<br/>43<br/>44<br/>45<br/>46<br/>47</p> <p><b>Nandi, Schneider &amp; Dixit, 2017</b></p> | <p>Secondary data, multivariate logistic regression</p> | <p>NSSO, the Chhattisgarh State data used in this study were extracted from the 25th schedule of the 71st round of the cross-sectional Indian National Sample Survey, conducted between January and June 2014. The Chhattisgarh sample included 1205 house-holds and 6026 individuals (household members)</p> | <p>PFHI covered: Government funded health insurance schemes in Chhattisgarh viz. RSBY, MSBY, ESIS, CGHS</p> | <p><b>Hospitalization:</b><br/>AOR (95% CI), N= 5977<br/>-A person with insurance was significantly more likely to be hospitalized compared to a person with no insurance (AOR 1.388; 95% CI: 1.190–1.620).<br/>-Women (AOR1.80;95%CI:1.252.58), Scheduled Tribes and the poorest(Q1) were significantly more likely to be hospitalized in the public sector than men, other social groups and other UMPCE groups respectively.<br/>-Taking infection as the reference group, conditions like cancer (AOR0.11;95%CI:0.01–0.94) and respiratory conditions (AOR0.30;95%CI:0.09–0.97) were significantly less likely causes of admission in the public sector,</p> |
|-------------------------------------------------------------------------------------------------------------------------------------------------------------------------------------------------------------------------------------------------------------------------------------------------------------------------------------------------------------------------------------|---------------------------------------------------------|---------------------------------------------------------------------------------------------------------------------------------------------------------------------------------------------------------------------------------------------------------------------------------------------------------------|-------------------------------------------------------------------------------------------------------------|------------------------------------------------------------------------------------------------------------------------------------------------------------------------------------------------------------------------------------------------------------------------------------------------------------------------------------------------------------------------------------------------------------------------------------------------------------------------------------------------------------------------------------------------------------------------------------------------------------------------------------------------------------------|

1  
2  
3  
4  
5  
6  
7  
8  
9  
10  
11  
12  
13  
14  
15  
16  
17  
18  
19  
20  
21  
22  
23  
24  
25  
26  
27  
28  
29  
30  
31  
32  
33  
34  
35  
36  
37  
38  
39  
40  
41  
42  
43  
44  
45  
46  
47

|                                                                  |                                                                                                                                                                                                                                                                                   |                                                                                                                                                                                                                                                                                                                    |                                                                                                                                                                                                                |                                                                                                                                                                                                                                                                                                                                                                                                                                                                                                                                                                                  |
|------------------------------------------------------------------|-----------------------------------------------------------------------------------------------------------------------------------------------------------------------------------------------------------------------------------------------------------------------------------|--------------------------------------------------------------------------------------------------------------------------------------------------------------------------------------------------------------------------------------------------------------------------------------------------------------------|----------------------------------------------------------------------------------------------------------------------------------------------------------------------------------------------------------------|----------------------------------------------------------------------------------------------------------------------------------------------------------------------------------------------------------------------------------------------------------------------------------------------------------------------------------------------------------------------------------------------------------------------------------------------------------------------------------------------------------------------------------------------------------------------------------|
|                                                                  |                                                                                                                                                                                                                                                                                   |                                                                                                                                                                                                                                                                                                                    |                                                                                                                                                                                                                | <p>obstetric and childbirth-related conditions were significantly more likely in the public sector (AOR1.63;95%CI:1.03–2.57).</p> <p>-Enrolment in government insurance was associated with hospitalization in the public sector at 90% Confidence Levels (AOR1.32;90%CI:1.01–1.72)</p>                                                                                                                                                                                                                                                                                          |
| <p><b>Philip, Kan</b><br/><b>nan,</b><br/><b>Sarma, 2017</b></p> | <p>A comparative cross-sectional survey</p> <p>The demographic and socioeconomic characteristics and health care utilization of insured and uninsured households were compared using Pearson’s <math>\chi^2</math> test.</p> <p>Multivariate logistic regression analysis was</p> | <p>Using generalized estimating equations, the correlates of inpatient service utilization of individuals were estimated. The models were built by the method of iterative backward elimination and forward selection because the study did not use any conceptual framework, and it aimed at exploration. The</p> | <p>PFHI covered: CHIS of Kerala</p> <p>A total of 149 insured and 147 uninsured households, with 667 and 578 members, respectively, were included in the study conducted in Trivandrum district of Kerala.</p> | <p>-Overall Outpatient service utilization: 29.1% and</p> <p>-Overall Inpatient service utilization: 38.5%.</p> <p>-The utilization of outpatient services among insured (31.5%) and uninsured (26.5%) households; <math>P = 0.342</math>, statistically not significant at 95% CI.</p> <p>-The inpatient service utilization (insured, 44.3%; uninsured, 32.7%) with a <math>P</math> value of .04, statistically significant difference at 95% CI.</p> <p>-Inpatient service utilization among insured participants compared to noninsured (OR = 1.57; 95% CI = 1.05-2.34)</p> |

|                                   |                                                           |                                                                                                                           |                                                                              |                                                                                                                                                                                                                                                                                                                                                                                                                                                                                                                                                                                              |
|-----------------------------------|-----------------------------------------------------------|---------------------------------------------------------------------------------------------------------------------------|------------------------------------------------------------------------------|----------------------------------------------------------------------------------------------------------------------------------------------------------------------------------------------------------------------------------------------------------------------------------------------------------------------------------------------------------------------------------------------------------------------------------------------------------------------------------------------------------------------------------------------------------------------------------------------|
|                                   | <p>used to derive the predictors of insurance status.</p> | <p>Mann-Whitney <i>U</i> test was used to compare the expenditure associated with inpatient care between the 2 groups</p> |                                                                              | <p>-Insurance status was found to be a significant correlate for inpatient service utilization after adjusting for age, sex, and chronic diseases</p> <p>-Generalized estimating equations for inpatient services (95% CI)</p> <ul style="list-style-type: none"> <li>○ Age (0-5 reference category):</li> <li>○ 6-15 y: OR 4.0 (0.5-30.4), p=0.176</li> <li>○ 16-45 y: OR: 2.0 (1.0-4.2), p=0.060</li> <li>○ &gt;45 y: OR: 1.9 (1.3-3.0), p=.002</li> <li>○ Gender (Male/female): OR 1.5 (0.9-2.4) p=0.084</li> <li>○ Preexisting chronic disease: OR (0.5 0.3-0.7), p= &lt;.001</li> </ul> |
| <p><b>Ranjan et al., 2018</b></p> | <p>Analysis of a cross-sectional survey</p>               | <p>-Data from the 71<sup>st</sup> round of NSSO survey I.e. ‘Social Consumption: Health’ survey</p>                       | <p>PFHI covered: Public Funded Health Insurance (PFHI) schemes e.g. RSBY</p> | <p><b>1) Percentage of total hospitalization cases according to insurance coverage</b></p> <p>A) Rural<br/>With government insurance</p>                                                                                                                                                                                                                                                                                                                                                                                                                                                     |

1  
2  
3  
4  
5  
6  
7  
8  
9  
10  
11  
12  
13  
14  
15  
16  
17  
18  
19  
20  
21  
22  
23  
24  
25  
26  
27  
28  
29  
30  
31  
32  
33  
34  
35  
36  
37  
38  
39  
40  
41  
42  
43  
44  
45  
46  
47

|  |  |                                                                                                                         |  |                                                                                                                                                                                                                                                                                                                                                                                                                                                                                                                                                                                                                                                                                        |
|--|--|-------------------------------------------------------------------------------------------------------------------------|--|----------------------------------------------------------------------------------------------------------------------------------------------------------------------------------------------------------------------------------------------------------------------------------------------------------------------------------------------------------------------------------------------------------------------------------------------------------------------------------------------------------------------------------------------------------------------------------------------------------------------------------------------------------------------------------------|
|  |  | <p>-Propensity score matching (PSM) for the effectiveness of PFHIs and multiple logistic regression for association</p> |  | <p>All=49.8%; Poorest= 79.0%; Poor= 62.7%; Middle= 56.8%; Rich= 40.2%; Richest= 34.3%</p> <p>Without government insurance</p> <p>All= 50.8%; Poorest= 67.7%; Poor= 61.7%; Middle= 52.6%; Rich= 47.4%; Richest= 29.1%</p> <p>B) Urban</p> <p>With government insurance</p> <p>All= 40.4%; Poorest= 57.6%; Poor= 47.8%; Middle= 38.6%; Rich= 35.5%; Richest= 24.4%</p> <p>Without government insurance</p> <p>All= 36.1%; Poorest= 51.6%; Poor= 42.0%; Middle= 33.6%; Rich= 23.3%; Richest= 16.2%</p> <p><b>2) Hospitalization rate per 100 population</b></p> <p>For government insurance= 5.4%; No insurance=4.2%</p> <p><b>3) Factors effecting likelihood of hospitalization</b></p> |
|--|--|-------------------------------------------------------------------------------------------------------------------------|--|----------------------------------------------------------------------------------------------------------------------------------------------------------------------------------------------------------------------------------------------------------------------------------------------------------------------------------------------------------------------------------------------------------------------------------------------------------------------------------------------------------------------------------------------------------------------------------------------------------------------------------------------------------------------------------------|

|                                                                                                                                                                                                                                                                               |                         |                                                                                                 |                                                                                                                                                                                                        |                                                                                                                                                                                                                                                                                                                                    |                                                                                                                                                                                                                                                                                                                                                                                                                                                                                                                                                                                                                                                                                                              |
|-------------------------------------------------------------------------------------------------------------------------------------------------------------------------------------------------------------------------------------------------------------------------------|-------------------------|-------------------------------------------------------------------------------------------------|--------------------------------------------------------------------------------------------------------------------------------------------------------------------------------------------------------|------------------------------------------------------------------------------------------------------------------------------------------------------------------------------------------------------------------------------------------------------------------------------------------------------------------------------------|--------------------------------------------------------------------------------------------------------------------------------------------------------------------------------------------------------------------------------------------------------------------------------------------------------------------------------------------------------------------------------------------------------------------------------------------------------------------------------------------------------------------------------------------------------------------------------------------------------------------------------------------------------------------------------------------------------------|
|                                                                                                                                                                                                                                                                               |                         |                                                                                                 |                                                                                                                                                                                                        | Insurance (irrespective of the type of insurance) OR= 1.06 (95% CI= 0.98 to 1.14)                                                                                                                                                                                                                                                  |                                                                                                                                                                                                                                                                                                                                                                                                                                                                                                                                                                                                                                                                                                              |
| 1<br>2<br>3<br>4<br>5<br>6<br>7<br>8<br>9<br>10<br>11<br>12<br>13<br>14<br>15<br>16<br>17<br>18<br>19<br>20<br>21<br>22<br>23<br>24<br>25<br>26<br>27<br>28<br>29<br>30<br>31<br>32<br>33<br>34<br>35<br>36<br>37<br>38<br>39<br>40<br>41<br>42<br>43<br>44<br>45<br>46<br>47 | <b>Rao et al., 2014</b> | A difference-in-differences (DID) using repeated cross-sectional surveys with parallel control. | NSSO 2004 survey, A total of 5314 and 5059 households from Maharashtra (MH) and Andhra Pradesh (AP) were surveyed by the NSSO in 2004 and Survey in 2012 included 10073 (MH) and 8623 (AP) households. | PFHI covered: RSBY and Arogyashree<br>Two cross-sectional surveys: as a baseline, the data from the NSSO 2004 survey collected before the Aarogyasri and RSBY schemes were launched; and as post-intervention, a survey using the same methodology conducted in 2012.<br>A survey of 18 696 HHs across 2 states and 1871 locations | <b>Hospitalization rates</b> (inpatient care): (number of individuals hospitalized during the previous year, per 1000 population): DID mean (95% CI) for both the states, Adjusted for co-variables 0.7 (-8.6 to 10.2), p value: 0.8685.<br>1.Gender: Hospitalization rates increased for both genders but statistically significant for female headed HHs (DID mean=27.6, 95% CI 1.1 to 54.1, p=0.0415)<br>2.Social class: Schedule tribe: DID mean: -19.8 (95% CI: -37.3 to -2.3) p=0.0272, for other social groups (SC, other excluded groups and all groups) it was not significant<br>3.Quintile: Poorest: DID mean: -14.4 (95% CI: -28 to -0.31) p=0.0451, for other quintiles it was not significant. |



|                                              |                                                                                                     |                                                                                                                                                                                                                                             |                                                                                                                                                                                                        |                                                                                                                                                                                                                                                                                                                                                                                                                                                                                                                                                     |
|----------------------------------------------|-----------------------------------------------------------------------------------------------------|---------------------------------------------------------------------------------------------------------------------------------------------------------------------------------------------------------------------------------------------|--------------------------------------------------------------------------------------------------------------------------------------------------------------------------------------------------------|-----------------------------------------------------------------------------------------------------------------------------------------------------------------------------------------------------------------------------------------------------------------------------------------------------------------------------------------------------------------------------------------------------------------------------------------------------------------------------------------------------------------------------------------------------|
| <p><b>Raza, van de Poel, Panda, 2016</b></p> | <p>Two cross sectional surveys among SHG members themselves or the head of the (households) HHs</p> | <p>Primary study: Baseline survey: March and May 2010 (3,686 HHs) and follow-up survey: March and April in 2012 (3,318 HHs) and 2013 (3307 HHs). Location: Kanpur Dehat and Pratapgarh districts in Uttar Pradesh and Vaishali in Bihar</p> | <p>PFHI covered: RSBY</p>                                                                                                                                                                              | <p><b>Probability of hospitalizations:</b> RSBY membership is not significantly associated with the likelihood of hospitalization [<b>Pooled:</b> 0.000 (SE:0.010) n=10,125, <b>UP:</b> -0.010 (0.013), n= 6359; <b>Bihar:</b> 0.015 (0.017), n=3766] or the likelihood of positive spending within a HH, the latter most likely related to high likelihood of having expenses at baseline.<br/><b>Sensitivity analysis</b> by restricting the sample to households in the bottom two asset tertiles: Not significant for pooled, UP and Bihar.</p> |
| <p><b>Sood and Wagner et al, 2016</b></p>    | <p>Quasi experimental design<br/><br/>Logistic regression</p>                                       | <p>3478 households in 300 villages where VAS was implemented and 3486 households in 272 neighboring matched villages ineligible for VAS.<br/><br/>Total 572 villages</p>                                                                    | <p>PFHI covered: VAS<br/><br/>A government insurance programme that provided free tertiary care to households below the poverty line in half of villages in Karnataka from February 2010 to August</p> | <p>1) Treatment-seeking behavior:<br/>Households eligible for VAS were 4.4 percentage points (95% CI 0.7 to 8.2; 6.76% increase; p=0.022) more likely to seek treatment for their symptoms<br/><br/>For symptoms associated with cardiac conditions, the increase in treatment seeking was more pronounced and more statistically significant at 4.38 percentage points (95% CI 0.1 to 8.7; 7.04% increase;</p>                                                                                                                                     |

|  |  |  |                                                                  |                                                                                                                                                                                                                                                                                                                                                                                                                                                                                                                                                                                                                                                                                                                                                                                                 |
|--|--|--|------------------------------------------------------------------|-------------------------------------------------------------------------------------------------------------------------------------------------------------------------------------------------------------------------------------------------------------------------------------------------------------------------------------------------------------------------------------------------------------------------------------------------------------------------------------------------------------------------------------------------------------------------------------------------------------------------------------------------------------------------------------------------------------------------------------------------------------------------------------------------|
|  |  |  | <p>2012. VAS eligible villages and VAS non-eligible villages</p> | <p>p=0.046); non-cardiac symptoms at 3.92 percentage points (6.4%, p=0.085).</p> <p>A) Any symptoms/ Symptoms-cardiac conditions/Symptoms of non-cardiac condition</p> <ul style="list-style-type: none"> <li>- VAS eligible HHs, n=2250, 69.73% /62.32/ 58.2</li> <li>- VAS non-eligible HHs n=2209, 65.31%/ 66.71/ 62.16</li> <li>- Difference: 4.42 (0.7 to 8.2), P &lt; 0.01/ 4.37** (0.1 to 8.7) / 3.92* (-0.6 to 8.4)</li> <li>- Adjusted difference: 4.96 (1.0 to 8.9), P &lt; 0.01)/ 5.41** (0.9 to 9.9)/ 3.87* (-0.6 to 8.4)</li> </ul> <p>2) Post operation well-being:</p> <p>Respondents from VAS-eligible villages reported greater improvements in well-being after the hospitalization in all categories which were statistically significant in three of the six categories</p> |
|--|--|--|------------------------------------------------------------------|-------------------------------------------------------------------------------------------------------------------------------------------------------------------------------------------------------------------------------------------------------------------------------------------------------------------------------------------------------------------------------------------------------------------------------------------------------------------------------------------------------------------------------------------------------------------------------------------------------------------------------------------------------------------------------------------------------------------------------------------------------------------------------------------------|

1  
2  
3  
4  
5  
6  
7  
8  
9  
10  
11  
12  
13  
14  
15  
16  
17  
18  
19  
20  
21  
22  
23  
24  
25  
26  
27  
28  
29  
30  
31  
32  
33  
34  
35  
36  
37  
38  
39  
40  
41  
42  
43  
44  
45  
46  
47

|                         |                                                                                     |                                                                                                                                                  |                                                                                                                                                                                                                                      |                                                                                                                                                                                                                                                                                                                                                                                             |
|-------------------------|-------------------------------------------------------------------------------------|--------------------------------------------------------------------------------------------------------------------------------------------------|--------------------------------------------------------------------------------------------------------------------------------------------------------------------------------------------------------------------------------------|---------------------------------------------------------------------------------------------------------------------------------------------------------------------------------------------------------------------------------------------------------------------------------------------------------------------------------------------------------------------------------------------|
|                         |                                                                                     |                                                                                                                                                  |                                                                                                                                                                                                                                      | <p>No controls (N=173)/ Controls for illness composition (N=173)/ Controls for illness composition/ demographic characteristics†(N=173)</p> <ul style="list-style-type: none"> <li>• Walking ability 0.765*** (0.248)0.700*** (0.261)0.605** (0.273)</li> <li>• Pain 0.778*** (0.228)0.660*** (0.244)0.559** (0.246)</li> <li>• Anxiety0.464* (0.242)0.451* (0.261)0.387 (0.272)</li> </ul> |
| <b>Sood et al, 2014</b> | <p>Quasi experimental design</p> <p>Multi variate models were used for analysis</p> | <p>All households in sampled villages of Karnataka were asked to participate in a door-to-door survey, and 81% of them completed the survey.</p> | <p>PFHI covered= VAS 31 476 households (22 796 below poverty line and 8680 above poverty line) in 300 villages where the scheme was implemented and 28 633 households (21 767 below poverty line and 6866 above poverty line) in</p> | <p><b>Utilization of healthcare</b></p> <p><b>1. Households using tertiary care facility for potentially covered conditions</b></p> <p>A) All facilities<br/>Unadjusted= -4.3% (p=0.52)<br/>Adjusted= -5.4% (p=0.64)</p> <p>B) All tertiary care facilities<br/>Unadjusted= 12.3% (p=0.46)<br/>Adjusted= 19.9% (p=0.26)</p>                                                                 |

|                                       |                                                                                                            |                                                   |                                                                                                                                                                                                                                                                     |                                                                                                                                                                                                                                                                                                                                               |
|---------------------------------------|------------------------------------------------------------------------------------------------------------|---------------------------------------------------|---------------------------------------------------------------------------------------------------------------------------------------------------------------------------------------------------------------------------------------------------------------------|-----------------------------------------------------------------------------------------------------------------------------------------------------------------------------------------------------------------------------------------------------------------------------------------------------------------------------------------------|
|                                       |                                                                                                            |                                                   | <p>272 neighboring matched villages ineligible for the scheme.</p> <p>A government insurance program (Vajpayee Arogyashree scheme) that provided free tertiary care to households BPL in about half of villages in Karnataka from February 2010 to August 2012.</p> | <p>C) Excluding emergency department admissions and stays of <math>4 \leq \text{days}</math></p> <p>Unadjusted= 44.2% (p=0.06)</p> <p>Adjusted= 42.7% (p=0.08)</p> <p><b>Households reporting forgone need for care for VAS condition</b></p> <p>Reported forgone need</p> <p>Unadjusted= -35.5% (p=0.07)</p> <p>Adjusted=-33.4% (p=0.09)</p> |
| <p><b>Sriram &amp; Khan, 2020</b></p> | <p>Survey among poor individuals: Propensity score matching, logistic regression and Tobit regression.</p> | <p>NSSO survey 2014. N=64270 poor individuals</p> | <p>PFHI covered: Any PFHI scheme</p> <p>PFHI (n= 5917) were matched with control group (n=5917).</p>                                                                                                                                                                | <p><b>Effect of PFHI on hospitalization (Multivariate analysis):</b></p> <p>People enrolled in PFHI program have 1.23 (1.06-1.44) higher odds of incidence of hospitalization compared to poor people without HI.</p>                                                                                                                         |

1  
2  
3  
4  
5  
6  
7  
8  
9  
10  
11  
12  
13  
14  
15  
16  
17  
18  
19  
20  
21  
22  
23  
24  
25  
26  
27  
28  
29  
30  
31  
32  
33  
34  
35  
36  
37  
38  
39  
40  
41  
42  
43  
44  
45  
46  
47

|  |  |  |                                                                                                                                                                                                                                                                            |                                                                                                                                                                                                                                                                                                                                                                                                                                                                                                                                                                                                                                                                                                                                                                                                                                                                                                                 |
|--|--|--|----------------------------------------------------------------------------------------------------------------------------------------------------------------------------------------------------------------------------------------------------------------------------|-----------------------------------------------------------------------------------------------------------------------------------------------------------------------------------------------------------------------------------------------------------------------------------------------------------------------------------------------------------------------------------------------------------------------------------------------------------------------------------------------------------------------------------------------------------------------------------------------------------------------------------------------------------------------------------------------------------------------------------------------------------------------------------------------------------------------------------------------------------------------------------------------------------------|
|  |  |  | <p>Average Treatment on Treated (ATT)</p> <p>Propensity Score Testing of Two Groups: Treated=0.1407, Control= 0.1191, Difference= 0.0216, T statistic= 2.89, SE: 0.0074.</p> <p>Matched with age, individual consumption expenditure, HH size, location and education.</p> | <p>-Individuals with <b>chronic illnesses</b> have 3.55 (2.87–4.45) higher probability of hospitalization compared to individuals without any chronic conditions.</p> <p>-All the <b>age groups</b> show higher probability of hospitalization compared to the reference age group of less than 18 years. [19-40: 1.06 (0.82–1.36), 41 to 60 years 2.44 (1.89–3.15), 61 to 80 years 2.99 (2.14–4.17), Older than 80 years 4.85 (1.71–13.69)]</p> <p>-Individuals belonging to the medium i.e. 5-8 [0.77 (0.66–0.89)] and large I.e. more than 8 [0.47 (0.39–0.58)] <b>HHs size</b> had lower probability of incidence of hospitalization compared to individuals from small HHs.</p> <p>-Social group, religion, urban/rural location, household type, marital status, education, number of hospital beds in the state were not significant in explaining variability in the incidence of hospitalizations.</p> |
|--|--|--|----------------------------------------------------------------------------------------------------------------------------------------------------------------------------------------------------------------------------------------------------------------------------|-----------------------------------------------------------------------------------------------------------------------------------------------------------------------------------------------------------------------------------------------------------------------------------------------------------------------------------------------------------------------------------------------------------------------------------------------------------------------------------------------------------------------------------------------------------------------------------------------------------------------------------------------------------------------------------------------------------------------------------------------------------------------------------------------------------------------------------------------------------------------------------------------------------------|

|    |  |  |  |                                                             |
|----|--|--|--|-------------------------------------------------------------|
| 1  |  |  |  |                                                             |
| 2  |  |  |  |                                                             |
| 3  |  |  |  |                                                             |
| 4  |  |  |  | - state of residence of the individual using fixed effects  |
| 5  |  |  |  | had no significant effects.                                 |
| 6  |  |  |  |                                                             |
| 7  |  |  |  | <b>Effect of PFHI on the duration or length of</b>          |
| 8  |  |  |  | <b>hospitalization (Tobit model):</b>                       |
| 9  |  |  |  |                                                             |
| 10 |  |  |  | Being enrolled in PFHI had no significant effect [0.44      |
| 11 |  |  |  | (-0.47 - 1.35)] on the duration of hospitalization.         |
| 12 |  |  |  |                                                             |
| 13 |  |  |  | -People who had <b>chronic illnesses</b> [3.15 (1.96-4.33)] |
| 14 |  |  |  | had significantly higher duration of hospitalization        |
| 15 |  |  |  | compared to people with no chronic illnesses.               |
| 16 |  |  |  |                                                             |
| 17 |  |  |  | -Other covariates such as HH type, religion, age,           |
| 18 |  |  |  | urban/                                                      |
| 19 |  |  |  | rural location, HH size, marital status, education, and     |
| 20 |  |  |  | number of hospital beds had no significant effect on        |
| 21 |  |  |  | the duration of hospitalization                             |
| 22 |  |  |  |                                                             |
| 23 |  |  |  | - Rajasthan, Uttar Pradesh, and Gujarat were the only       |
| 24 |  |  |  | three state showing significant results in fixed effects    |
| 25 |  |  |  | for the state of residence                                  |
| 26 |  |  |  |                                                             |
| 27 |  |  |  |                                                             |
| 28 |  |  |  |                                                             |
| 29 |  |  |  |                                                             |
| 30 |  |  |  |                                                             |
| 31 |  |  |  |                                                             |
| 32 |  |  |  |                                                             |
| 33 |  |  |  |                                                             |
| 34 |  |  |  |                                                             |
| 35 |  |  |  |                                                             |
| 36 |  |  |  |                                                             |
| 37 |  |  |  |                                                             |
| 38 |  |  |  |                                                             |
| 39 |  |  |  |                                                             |
| 40 |  |  |  |                                                             |
| 41 |  |  |  |                                                             |
| 42 |  |  |  |                                                             |
| 43 |  |  |  |                                                             |
| 44 |  |  |  |                                                             |
| 45 |  |  |  |                                                             |
| 46 |  |  |  |                                                             |
| 47 |  |  |  |                                                             |

|                                     |                                                      |                                                                                                                                                                                                                                                                                                                                                                                                                                                                     |                                                                                                                                                                                                                                                                                                             |                                                                                                                                                                                                                                                                                                                                                                                                                                                                                                                                                                                                                          |
|-------------------------------------|------------------------------------------------------|---------------------------------------------------------------------------------------------------------------------------------------------------------------------------------------------------------------------------------------------------------------------------------------------------------------------------------------------------------------------------------------------------------------------------------------------------------------------|-------------------------------------------------------------------------------------------------------------------------------------------------------------------------------------------------------------------------------------------------------------------------------------------------------------|--------------------------------------------------------------------------------------------------------------------------------------------------------------------------------------------------------------------------------------------------------------------------------------------------------------------------------------------------------------------------------------------------------------------------------------------------------------------------------------------------------------------------------------------------------------------------------------------------------------------------|
| <p><b>Sabharwal et.al, 2014</b></p> | <p>Quasi experimental mixed methods study design</p> | <p>Two districts were selected for this study: Moradabad district in Uttar Pradesh and Aurangabad district in Maharashtra. At the block level (district sub-division), sites were selected where blocks had proportions of SC and Muslim population equal to the district average, and villages were selected with mixed social group populations. Altogether, the study was conducted in 30 villages (14 villages in Moradabad and 16 villages in Aurangabad).</p> | <p>PFHI covered: RSBY<br/>         1.Target group: SC, Muslim and upper caste poor households who are beneficiaries of RSBY (whether they have used the smart card or not)<br/>         2.Control group: SC, Muslim and upper caste poor households who are eligible for RSBY but who are not enrolled.</p> | <p><b>Health care utilization:</b><br/>         In-patient care: Non-beneficiary: Any member of the household ever hospitalized, 1.65 (n=78), Beneficiary but not used RSBY, 1.85 (n=134) and beneficiary but used RSBY, 1.80(n=203)<br/>         Between group F value: 0.60, not significant<br/>         Outpatient care: Non-beneficiary: Any member of the household never hospitalized, 2.71(n=361) Any member of the household ever hospitalized, 2.87(n=70), Beneficiary but not used RSBY, 2.67(n=772) and beneficiary but used RSBY, 2.45(n=249)<br/>         Between group F value: 1.76, not significant</p> |
|-------------------------------------|------------------------------------------------------|---------------------------------------------------------------------------------------------------------------------------------------------------------------------------------------------------------------------------------------------------------------------------------------------------------------------------------------------------------------------------------------------------------------------------------------------------------------------|-------------------------------------------------------------------------------------------------------------------------------------------------------------------------------------------------------------------------------------------------------------------------------------------------------------|--------------------------------------------------------------------------------------------------------------------------------------------------------------------------------------------------------------------------------------------------------------------------------------------------------------------------------------------------------------------------------------------------------------------------------------------------------------------------------------------------------------------------------------------------------------------------------------------------------------------------|

1  
2  
3  
4  
5  
6  
7  
8  
9  
10  
11  
12  
13  
14  
15  
16  
17  
18  
19  
20  
21  
22  
23  
24  
25  
26  
27  
28  
29  
30  
31  
32  
33  
34  
35  
36  
37  
38  
39  
40  
41  
42  
43  
44  
45  
46  
47

|                                         |  |                                                                                                                                                                                                                                                                                                                                                                             |  |  |
|-----------------------------------------|--|-----------------------------------------------------------------------------------------------------------------------------------------------------------------------------------------------------------------------------------------------------------------------------------------------------------------------------------------------------------------------------|--|--|
|                                         |  | <p>The households were randomly selected from each village based on RSBY beneficiary lists and BPL lists. The households in each location were stratified into beneficiary ('treatment') households and non-beneficiary or ('control') households. We included a control group in order to allow measurement of impact, given that this survey does not have a baseline</p> |  |  |
| <p><b>Financial risk protection</b></p> |  |                                                                                                                                                                                                                                                                                                                                                                             |  |  |



|                                                                                                                                                                                                                                                                                                                                                             |                                                                                                                    |                                                                                                                                                                                                                                           |                                                                                                                                                                                        |                                                                                                                                                                                                                                                                                                                                                                                                                                                                                                                                                                                                                                                                                                                                                                                                                         |
|-------------------------------------------------------------------------------------------------------------------------------------------------------------------------------------------------------------------------------------------------------------------------------------------------------------------------------------------------------------|--------------------------------------------------------------------------------------------------------------------|-------------------------------------------------------------------------------------------------------------------------------------------------------------------------------------------------------------------------------------------|----------------------------------------------------------------------------------------------------------------------------------------------------------------------------------------|-------------------------------------------------------------------------------------------------------------------------------------------------------------------------------------------------------------------------------------------------------------------------------------------------------------------------------------------------------------------------------------------------------------------------------------------------------------------------------------------------------------------------------------------------------------------------------------------------------------------------------------------------------------------------------------------------------------------------------------------------------------------------------------------------------------------------|
| <p>1<br/>2<br/>3<br/>4<br/>5<br/>6<br/>7<br/>8<br/>9<br/>10<br/>11<br/>12<br/>13<br/>14<br/>15<br/>16<br/>17<br/>18<br/>19<br/>20<br/>21<br/>22<br/>23<br/>24<br/>25<br/>26<br/>27<br/>28<br/>29<br/>30<br/>31<br/>32<br/>33<br/>34<br/>35<br/>36<br/>37<br/>38<br/>39<br/>40<br/>41<br/>42<br/>43<br/>44<br/>45<br/>46<br/>47</p> <p><b>Azam, 2017</b></p> | <p>Three large scaled household surveys Matching difference-in-difference analysis (MDID) of longitudinal data</p> | <p>Two waves of India Human Development Survey (2011-12) and (2004-2005) and Human Development Profile of India (HDPI) collected in 1993-94. Data from three states I.e. Andhra Pradesh, Karnataka and Tamil Nadu was not considered.</p> | <p>PFHI covered: RSBY The households having RSBY cards were considered as treatment groups and household not having RSBY cards were control groups in an RSBY implemented district</p> | <p><b>OOPE</b></p> <p><b>Rural India:</b></p> <p>A) RSBY HHs were 1.1% points (<math>p&gt;0.05</math>; <math>SE=0.013</math>) more likely to report OOPE expenditure. ATT as % change for RSBY HHs was 1.56.</p> <p>B) Per capita in-patient expenditure (in INR) for RSBY HHs was -11.567 (<math>SE=12.897</math>). ATT as % change for RSBY HHs was -19.46.</p> <p>C) Per capita out-patient expenditure (in INR) for RSBY HHs was 11.257 (<math>SE=11.200</math>). ATT as % change for RSBY HHs was -11.89</p> <p>D) Per capita total OOP in INR for RSBY HHs was -22.717 (<math>SE=20.156</math>). ATT as % change for RSBY HHs was -14.76.</p> <p>E) RSBY HHs were -0.5% points (<math>p&gt;0.05</math>; <math>SE=0.014</math>) more likely to incur Catastrophic medical expenditure (10% of consumption exp)</p> |
|-------------------------------------------------------------------------------------------------------------------------------------------------------------------------------------------------------------------------------------------------------------------------------------------------------------------------------------------------------------|--------------------------------------------------------------------------------------------------------------------|-------------------------------------------------------------------------------------------------------------------------------------------------------------------------------------------------------------------------------------------|----------------------------------------------------------------------------------------------------------------------------------------------------------------------------------------|-------------------------------------------------------------------------------------------------------------------------------------------------------------------------------------------------------------------------------------------------------------------------------------------------------------------------------------------------------------------------------------------------------------------------------------------------------------------------------------------------------------------------------------------------------------------------------------------------------------------------------------------------------------------------------------------------------------------------------------------------------------------------------------------------------------------------|

|    |  |  |  |                                                           |
|----|--|--|--|-----------------------------------------------------------|
| 1  |  |  |  |                                                           |
| 2  |  |  |  |                                                           |
| 3  |  |  |  |                                                           |
| 4  |  |  |  | F) RSBY HHS were 1.1% points ( $p>0.05$ ; $SE=0.010$ )    |
| 5  |  |  |  | more likely to incur Catastrophic medical expenditure     |
| 6  |  |  |  | (25% of consumption exp.)                                 |
| 7  |  |  |  |                                                           |
| 8  |  |  |  | G) RSBY HHs were 0.8% points ( $p>0.05$ ; $SE=0.008$ )    |
| 9  |  |  |  | more likely to take loan for meeting medical              |
| 10 |  |  |  | expenses.                                                 |
| 11 |  |  |  |                                                           |
| 12 |  |  |  | H) Per capita expenditure on long-term morbidity, for     |
| 13 |  |  |  | RSBY HHs, was $-13.450$ ( $p>0.05$ ; $SE=12.531$ )        |
| 14 |  |  |  |                                                           |
| 15 |  |  |  | I) Per capita expenditure on medicines, for RSBY          |
| 16 |  |  |  | households was $-21.782$ ( $p<0.05$ ; $SE=9.492$ ) (This  |
| 17 |  |  |  | means reduction by 22 INR)                                |
| 18 |  |  |  |                                                           |
| 19 |  |  |  | <b>Urban India:</b>                                       |
| 20 |  |  |  | A) RSBY HHs were $-3.7\%$ points ( $p<0.1$ ; $SE=0.020$ ) |
| 21 |  |  |  | more likely to incur OOPE. ATT as % change for            |
| 22 |  |  |  | RSBY HHs was $-5.56$ .                                    |
| 23 |  |  |  |                                                           |
| 24 |  |  |  | B) For RSBY HHs, per capita inpatient expenditure in      |
| 25 |  |  |  | INR was $-3.786$ ( $p>0.05$ ; $SE=38.906$ ).              |
| 26 |  |  |  |                                                           |
| 27 |  |  |  |                                                           |
| 28 |  |  |  |                                                           |
| 29 |  |  |  |                                                           |
| 30 |  |  |  |                                                           |
| 31 |  |  |  |                                                           |
| 32 |  |  |  |                                                           |
| 33 |  |  |  |                                                           |
| 34 |  |  |  |                                                           |
| 35 |  |  |  |                                                           |
| 36 |  |  |  |                                                           |
| 37 |  |  |  |                                                           |
| 38 |  |  |  |                                                           |
| 39 |  |  |  |                                                           |
| 40 |  |  |  |                                                           |
| 41 |  |  |  |                                                           |
| 42 |  |  |  |                                                           |
| 43 |  |  |  |                                                           |
| 44 |  |  |  |                                                           |
| 45 |  |  |  |                                                           |
| 46 |  |  |  |                                                           |
| 47 |  |  |  |                                                           |

1  
2  
3  
4  
5  
6  
7  
8  
9  
10  
11  
12  
13  
14  
15  
16  
17  
18  
19  
20  
21  
22  
23  
24  
25  
26  
27  
28  
29  
30  
31  
32  
33  
34  
35  
36  
37  
38  
39  
40  
41  
42  
43  
44  
45  
46  
47

|  |  |  |  |                                                                                                                                                                                                                                                                                                                                                                                                                                                                                                                                                                                                                                                                                                                                                                                                                                                                                              |
|--|--|--|--|----------------------------------------------------------------------------------------------------------------------------------------------------------------------------------------------------------------------------------------------------------------------------------------------------------------------------------------------------------------------------------------------------------------------------------------------------------------------------------------------------------------------------------------------------------------------------------------------------------------------------------------------------------------------------------------------------------------------------------------------------------------------------------------------------------------------------------------------------------------------------------------------|
|  |  |  |  | <p>C) For RSBY HHs, per capita outpatient expenditure in INR was -10.574 (<math>p&gt;0.05</math>; SE=11.390)</p> <p>D) Per capita total OOP in INR was - 14.540 (<math>p&gt;0.05</math>; SE=35.198)</p> <p>E) RSBY HHs were -3.3% points (<math>p&gt;0.05</math>; SE=0.022) more likely to incur catastrophic medical expenditure (10% of consumption exp.)</p> <p>F) RSBY HHs were -2.2% points (<math>p&gt;0.05</math>; SE=0.014) more likely to incur catastrophic medical expenditure (25% of consumption exp.)</p> <p>G) RSBY HHs were 3.0% points (<math>p&lt;0.05</math>; SE=0.013) more likely to take loan for meeting medical expenses</p> <p>H) Per capita expenditure on long-term morbidity, for RSBY HHs, was 40.978 (<math>p&gt;0.05</math>; SE=31.105)</p> <p>I) Per capita expenditure on medicines, for RSBY households was 28.763 (<math>p&gt;0.05</math>; SE=31.492)</p> |
|--|--|--|--|----------------------------------------------------------------------------------------------------------------------------------------------------------------------------------------------------------------------------------------------------------------------------------------------------------------------------------------------------------------------------------------------------------------------------------------------------------------------------------------------------------------------------------------------------------------------------------------------------------------------------------------------------------------------------------------------------------------------------------------------------------------------------------------------------------------------------------------------------------------------------------------------|

For peer review only

|                                                                                                                                                                                                                                                                                                                                                                      |                                                                                                                                             |                                                                                                                                                                                                             |                                                                                                                                                                                                                                               |                                                                                                                                                                                                                                                                                                                                                                                                                                                                                                                                                                                                                                                            |
|----------------------------------------------------------------------------------------------------------------------------------------------------------------------------------------------------------------------------------------------------------------------------------------------------------------------------------------------------------------------|---------------------------------------------------------------------------------------------------------------------------------------------|-------------------------------------------------------------------------------------------------------------------------------------------------------------------------------------------------------------|-----------------------------------------------------------------------------------------------------------------------------------------------------------------------------------------------------------------------------------------------|------------------------------------------------------------------------------------------------------------------------------------------------------------------------------------------------------------------------------------------------------------------------------------------------------------------------------------------------------------------------------------------------------------------------------------------------------------------------------------------------------------------------------------------------------------------------------------------------------------------------------------------------------------|
| <p>1<br/>2<br/>3<br/>4<br/>5<br/>6<br/>7<br/>8<br/>9<br/>10<br/>11<br/>12<br/>13<br/>14<br/>15<br/>16<br/>17<br/>18<br/>19<br/>20<br/>21<br/>22<br/>23<br/>24<br/>25<br/>26<br/>27<br/>28<br/>29<br/>30<br/>31<br/>32<br/>33<br/>34<br/>35<br/>36<br/>37<br/>38<br/>39<br/>40<br/>41<br/>42<br/>43<br/>44<br/>45<br/>46<br/>47</p> <p><b>Barnes et al., 2017</b></p> | <p>Cross sectional household Survey (nature experiment)</p> <p>Models used for analysis:<br/>Empirical model<br/>Stylized utility model</p> | <p>Survey was carried out in total of 572 village 272 villages from the northern part of Karnataka and 300 villages from the southern part of Karnataka</p> <p>Total sample was 6964 HHs with BPL cards</p> | <p>PFHI covered: Vajpayee Arogya Shree Scheme</p> <p>Intervention group: northern district village that had access to VAS: 272 Villages</p> <p>Control group: Southern district villages that did not have an access to VAS: 300 Villages</p> | <p><b>1) Money borrowed for health reasons in past one year</b></p> <p>VAS households= 20.7%</p> <p>Non-VAS households= 24.2%</p> <p>Difference= -3.5% (p&lt;0.01)</p> <p><b>2) Catastrophic health care expenditures</b></p> <p>Percentage of non-food expenditure limit</p> <p>A) Percentage reaching catastrophic limit:</p> <p>a. 40% of non- food expenditure limit</p> <p>VAS= 2.70%</p> <p>Non-VAS= 3.41 %</p> <p>Difference= -0.71% (p&lt;0.1)</p> <p>b. 50% of non- food expenditure limit</p> <p>VAS= 2.22%</p> <p>Non-VAS= 2.6 1%</p> <p>Difference= -0.39% (non-significant)</p> <p>c.60% of non- food expenditure limit</p> <p>VAS= 1.68%</p> |
|----------------------------------------------------------------------------------------------------------------------------------------------------------------------------------------------------------------------------------------------------------------------------------------------------------------------------------------------------------------------|---------------------------------------------------------------------------------------------------------------------------------------------|-------------------------------------------------------------------------------------------------------------------------------------------------------------------------------------------------------------|-----------------------------------------------------------------------------------------------------------------------------------------------------------------------------------------------------------------------------------------------|------------------------------------------------------------------------------------------------------------------------------------------------------------------------------------------------------------------------------------------------------------------------------------------------------------------------------------------------------------------------------------------------------------------------------------------------------------------------------------------------------------------------------------------------------------------------------------------------------------------------------------------------------------|

1  
2  
3  
4  
5  
6  
7  
8  
9  
10  
11  
12  
13  
14  
15  
16  
17  
18  
19  
20  
21  
22  
23  
24  
25  
26  
27  
28  
29  
30  
31  
32  
33  
34  
35  
36  
37  
38  
39  
40  
41  
42  
43  
44  
45  
46  
47

|  |  |  |  |                                              |
|--|--|--|--|----------------------------------------------|
|  |  |  |  | Non-VAS= 2.08%                               |
|  |  |  |  | Difference= -0.40% (not significant)         |
|  |  |  |  | d. 70% of non- food expenditure limit        |
|  |  |  |  | VAS= 1.34%                                   |
|  |  |  |  | Non-VAS= 1.80%                               |
|  |  |  |  | Difference= -0.46 % (non-significant)        |
|  |  |  |  | e.80% of non- food expenditure limit         |
|  |  |  |  | VAS= 0.91%                                   |
|  |  |  |  | Non-VAS= 1.54%                               |
|  |  |  |  | Difference= -0.6 3% (p<0.05)                 |
|  |  |  |  | B) Mean amount over catastrophic limit (INR) |
|  |  |  |  | a. 40% of non- food expenditure limit        |
|  |  |  |  | VAS= 36 ,822.19                              |
|  |  |  |  | Non-VAS= 56 ,700.92                          |
|  |  |  |  | Difference= -19,878.73 (p<0.05)              |
|  |  |  |  | b. 50% of non- food expenditure limit        |
|  |  |  |  | VAS= 36,862.71                               |
|  |  |  |  | Non-VAS= 66,307.45                           |

For peer review only

|    |  |  |  |                                            |
|----|--|--|--|--------------------------------------------|
| 1  |  |  |  | Difference= -29,444.75 (p<0.05)            |
| 2  |  |  |  |                                            |
| 3  |  |  |  |                                            |
| 4  |  |  |  |                                            |
| 5  |  |  |  | c.60% of non- food expenditure limit       |
| 6  |  |  |  | VAS= 40,356.36                             |
| 7  |  |  |  | Non-VAS= 75, 415.93                        |
| 8  |  |  |  |                                            |
| 9  |  |  |  | Difference= -35, 05 9.58 (p<0.05)          |
| 10 |  |  |  |                                            |
| 11 |  |  |  | d. 70% of non- food expenditure limit      |
| 12 |  |  |  | VAS= 43,215.88                             |
| 13 |  |  |  | Non-VAS= 80,362.84                         |
| 14 |  |  |  |                                            |
| 15 |  |  |  | Difference= -37,146.96 (p<0.05)            |
| 16 |  |  |  |                                            |
| 17 |  |  |  | e.80% of non- food expenditure limit       |
| 18 |  |  |  | VAS= 56,292.79                             |
| 19 |  |  |  | Non-VAS= 86,913.19                         |
| 20 |  |  |  |                                            |
| 21 |  |  |  | Difference= -30,620.40 (non-significant)   |
| 22 |  |  |  |                                            |
| 23 |  |  |  | Percentage of total expenditure limit      |
| 24 |  |  |  | A) Percentage reaching catastrophic limit: |
| 25 |  |  |  | a. 10% of total expenditure limit          |
| 26 |  |  |  | VAS= 10.03%                                |
| 27 |  |  |  | Non-VAS= 10.09%                            |
| 28 |  |  |  |                                            |
| 29 |  |  |  |                                            |
| 30 |  |  |  |                                            |
| 31 |  |  |  |                                            |
| 32 |  |  |  |                                            |
| 33 |  |  |  |                                            |
| 34 |  |  |  |                                            |
| 35 |  |  |  |                                            |
| 36 |  |  |  |                                            |
| 37 |  |  |  |                                            |
| 38 |  |  |  |                                            |
| 39 |  |  |  |                                            |
| 40 |  |  |  |                                            |
| 41 |  |  |  |                                            |
| 42 |  |  |  |                                            |
| 43 |  |  |  |                                            |
| 44 |  |  |  |                                            |
| 45 |  |  |  |                                            |
| 46 |  |  |  |                                            |
| 47 |  |  |  |                                            |

1  
2  
3  
4  
5  
6  
7  
8  
9  
10  
11  
12  
13  
14  
15  
16  
17  
18  
19  
20  
21  
22  
23  
24  
25  
26  
27  
28  
29  
30  
31  
32  
33  
34  
35  
36  
37  
38  
39  
40  
41  
42  
43  
44  
45  
46  
47

|  |  |  |  |                                              |
|--|--|--|--|----------------------------------------------|
|  |  |  |  | Difference= -0.05 % (non-significant)        |
|  |  |  |  | b. 20% of total expenditure limit            |
|  |  |  |  | VAS= 5.92%                                   |
|  |  |  |  | Non-VAS= 6.38%                               |
|  |  |  |  | Difference= -0.46 % (non-significant)        |
|  |  |  |  | c. 30% of total expenditure limit            |
|  |  |  |  | VAS= 3.89%                                   |
|  |  |  |  | Non-VAS= 4.49%                               |
|  |  |  |  | Difference= -0.60% (non-significant)         |
|  |  |  |  | d. 40% of total expenditure limit            |
|  |  |  |  | VAS= 2.58%                                   |
|  |  |  |  | Non-VAS= 3.34%                               |
|  |  |  |  | Difference= -0.76 % (p<0.1)                  |
|  |  |  |  | e. 50% of total expenditure limit            |
|  |  |  |  | VAS= 2.09%                                   |
|  |  |  |  | Non-VAS= 2.55 %                              |
|  |  |  |  | Difference= -0.45 % (non-significant)        |
|  |  |  |  | B) Mean amount over catastrophic limit (INR) |

For peer review only

|    |  |  |  |                                   |
|----|--|--|--|-----------------------------------|
| 1  |  |  |  |                                   |
| 2  |  |  |  |                                   |
| 3  |  |  |  | a. 10% of total expenditure limit |
| 4  |  |  |  | VAS= 21,313.18                    |
| 5  |  |  |  | Non-VAS= 31,983.49                |
| 6  |  |  |  | Difference= -10,670.31 (p<0.01)   |
| 7  |  |  |  |                                   |
| 8  |  |  |  | b. 20% of total expenditure limit |
| 9  |  |  |  | VAS= 26,232.83                    |
| 10 |  |  |  | Non-VAS= 40,554.01                |
| 11 |  |  |  | Difference= -14,321.17 (p<0.05)   |
| 12 |  |  |  |                                   |
| 13 |  |  |  | c. 30% of total expenditure limit |
| 14 |  |  |  | VAS= 30,760.43                    |
| 15 |  |  |  | Non-VAS= 48,536.53                |
| 16 |  |  |  | Difference= -17,776.10 (p<0.05)   |
| 17 |  |  |  |                                   |
| 18 |  |  |  | d. 40% of total expenditure limit |
| 19 |  |  |  | VAS= 37,489.47                    |
| 20 |  |  |  | Non-VAS= 56,974.87                |
| 21 |  |  |  | Difference= -19,485.41 (p<0.05)   |
| 22 |  |  |  |                                   |
| 23 |  |  |  | e. 50% of total expenditure limit |
| 24 |  |  |  | VAS= 37,690.21                    |
| 25 |  |  |  |                                   |
| 26 |  |  |  |                                   |
| 27 |  |  |  |                                   |
| 28 |  |  |  |                                   |
| 29 |  |  |  |                                   |
| 30 |  |  |  |                                   |
| 31 |  |  |  |                                   |
| 32 |  |  |  |                                   |
| 33 |  |  |  |                                   |
| 34 |  |  |  |                                   |
| 35 |  |  |  |                                   |
| 36 |  |  |  |                                   |
| 37 |  |  |  |                                   |
| 38 |  |  |  |                                   |
| 39 |  |  |  |                                   |
| 40 |  |  |  |                                   |
| 41 |  |  |  |                                   |
| 42 |  |  |  |                                   |
| 43 |  |  |  |                                   |
| 44 |  |  |  |                                   |
| 45 |  |  |  |                                   |
| 46 |  |  |  |                                   |
| 47 |  |  |  |                                   |



1  
2  
3  
4  
5  
6  
7  
8  
9  
10  
11  
12  
13  
14  
15  
16  
17  
18  
19  
20  
21  
22  
23  
24  
25  
26  
27  
28  
29  
30  
31  
32  
33  
34  
35  
36  
37  
38  
39  
40  
41  
42  
43  
44  
45  
46  
47

|  |  |  |  |                                                                                                                                                                                                                                                                                                                                                                                                                                                                                                                                                                                                                                                                                                                                  |
|--|--|--|--|----------------------------------------------------------------------------------------------------------------------------------------------------------------------------------------------------------------------------------------------------------------------------------------------------------------------------------------------------------------------------------------------------------------------------------------------------------------------------------------------------------------------------------------------------------------------------------------------------------------------------------------------------------------------------------------------------------------------------------|
|  |  |  |  | <p>Non-VAS= 66,712.53</p> <p>Difference= -29,022.32 (p&lt;0.05)</p> <p><b>3) Distributional effects of access to insurance on out-of-pocket spending</b></p> <p><b>Using conditional quantile regression and censored quantile regression</b></p> <p>Conditional VAS Estimates Using Koenker &amp; Basset Estimator</p> <p>5<sup>th</sup> Quantile: VAS estimate= -529.99 (SE=215.56, p&lt;0.05)</p> <p>10<sup>th</sup> Quantile: VAS estimate= -711.76 (SE=243.99, p&lt;0.01)</p> <p>15<sup>th</sup> Quantile: VAS estimate= -876.62 (SE=343.74, p&lt;0.05)</p> <p>25<sup>th</sup> Quantile: VAS estimate= -1,485.29 (SE=459.92, p&lt;0.01)</p> <p>40<sup>th</sup> Quantile: VAS estimate= -2,197.19 (SE=495.55, p&lt;0.01)</p> |
|--|--|--|--|----------------------------------------------------------------------------------------------------------------------------------------------------------------------------------------------------------------------------------------------------------------------------------------------------------------------------------------------------------------------------------------------------------------------------------------------------------------------------------------------------------------------------------------------------------------------------------------------------------------------------------------------------------------------------------------------------------------------------------|

For peer review only

|    |  |  |  |                                                                |
|----|--|--|--|----------------------------------------------------------------|
| 1  |  |  |  |                                                                |
| 2  |  |  |  |                                                                |
| 3  |  |  |  | 50 <sup>th</sup> Quantile: VAS estimate= -2,878.92 (SE=706.33, |
| 4  |  |  |  | p<0.01)                                                        |
| 5  |  |  |  |                                                                |
| 6  |  |  |  | 60 <sup>th</sup> Quantile: VAS estimate= -2,589.79             |
| 7  |  |  |  | (SE=1,242.94, p<0.05)                                          |
| 8  |  |  |  |                                                                |
| 9  |  |  |  | 75 <sup>th</sup> Quantile: VAS estimate= -4,484.71             |
| 10 |  |  |  | (SE=1,340.32, p<0.01)                                          |
| 11 |  |  |  |                                                                |
| 12 |  |  |  | 85 <sup>th</sup> Quantile: VAS estimate= -6,408.61 (SE=3,600.6 |
| 13 |  |  |  | 8, p<0.1)                                                      |
| 14 |  |  |  |                                                                |
| 15 |  |  |  | 90 <sup>th</sup> Quantile: VAS estimate= -4,941.37             |
| 16 |  |  |  | (SE=5,196.11, p>0.1)                                           |
| 17 |  |  |  |                                                                |
| 18 |  |  |  | 95 <sup>th</sup> Quantile: VAS                                 |
| 19 |  |  |  | estimate= -23,548.1 (SE=8,199.09, p<0.01)                      |
| 20 |  |  |  |                                                                |
| 21 |  |  |  | Unconditional VAS Estimates Using Chernozhukov &               |
| 22 |  |  |  | Hong Estimator                                                 |
| 23 |  |  |  |                                                                |
| 24 |  |  |  | For unconditional distribution effect on OOPE was not          |
| 25 |  |  |  | seen for initial lower quantiles                               |
| 26 |  |  |  |                                                                |
| 27 |  |  |  | 85 <sup>th</sup> Quantile: VAS estimate= 802.20 (SE=365.61,    |
| 28 |  |  |  | p<0.05)                                                        |
| 29 |  |  |  |                                                                |
| 30 |  |  |  |                                                                |
| 31 |  |  |  |                                                                |
| 32 |  |  |  |                                                                |
| 33 |  |  |  |                                                                |
| 34 |  |  |  |                                                                |
| 35 |  |  |  |                                                                |
| 36 |  |  |  |                                                                |
| 37 |  |  |  |                                                                |
| 38 |  |  |  |                                                                |
| 39 |  |  |  |                                                                |
| 40 |  |  |  |                                                                |
| 41 |  |  |  |                                                                |
| 42 |  |  |  |                                                                |
| 43 |  |  |  |                                                                |
| 44 |  |  |  |                                                                |
| 45 |  |  |  |                                                                |
| 46 |  |  |  |                                                                |
| 47 |  |  |  |                                                                |

|                                   |                                                                                  |                                                                                                                                                                         |                                                                                                                                                                                                                                                               |                                                                                                                                                                                                                                                                                                                                                                                                                                                                                                                                            |
|-----------------------------------|----------------------------------------------------------------------------------|-------------------------------------------------------------------------------------------------------------------------------------------------------------------------|---------------------------------------------------------------------------------------------------------------------------------------------------------------------------------------------------------------------------------------------------------------|--------------------------------------------------------------------------------------------------------------------------------------------------------------------------------------------------------------------------------------------------------------------------------------------------------------------------------------------------------------------------------------------------------------------------------------------------------------------------------------------------------------------------------------------|
|                                   |                                                                                  |                                                                                                                                                                         |                                                                                                                                                                                                                                                               | 90 <sup>th</sup> Quantile: VAS estimate= -1,026.96 (SE=705.06, p>0.1)<br>95 <sup>th</sup> Quantile: VAS estimate= -3,906.08 (SE=1,748.25, p<0.05)                                                                                                                                                                                                                                                                                                                                                                                          |
| <b>Fan, Karan and Mahal, 2012</b> | Secondary data analysis<br><br>Difference in difference (DID) method; regression | Data from Consumer Expenditure Surveys for 1999-2000, 2004-2005, 2007-2008 i.e., The 55 <sup>th</sup> , 61 <sup>st</sup> and 64 <sup>th</sup> round of the NSSO surveys | PFHI covered: Arogyashree in AP<br><br><b>Treatment groups (Andhra Pradesh)</b><br><br>Phase 1: Activities started in April 2007 and renewal in April 2008. Phase I districts were Ananthapur, Mahabubnagar, and Srikakulam. n: 2004-05=1702 and 2007-08 =448 | <b>The impact of Aarogyasri on per capita monthly OOP spending:</b><br><br>(Only statistically significant DID results are extracted here, **p<0.01, *p<0.05)<br><br><b>A. Andhra Pradesh sample</b><br><br><i>1. Inpatient expenditure:</i><br>a. Region and state fixed effects: Phase 1: -12.177 (SE: 0.352)***, Phase 2: Not significant result<br>b. With HH covariates in addition to region and state fixed effects<br>Phase 1: -11.822 (SE: 0.425)***, Phase 2: Not significant result<br><br><i>2. Inpatient drug expenditure</i> |

1  
2  
3  
4  
5  
6  
7  
8  
9  
10  
11  
12  
13  
14  
15  
16  
17  
18  
19  
20  
21  
22  
23  
24  
25  
26  
27  
28  
29  
30  
31  
32  
33  
34  
35  
36  
37  
38  
39  
40  
41  
42  
43  
44  
45  
46  
47

|  |  |  |                                                                                                                                                                                                                                                                                                                                                         |                                                                                                                                                                                                                                                                                                                                                                                                                                                                                                                                                                                                                                                       |
|--|--|--|---------------------------------------------------------------------------------------------------------------------------------------------------------------------------------------------------------------------------------------------------------------------------------------------------------------------------------------------------------|-------------------------------------------------------------------------------------------------------------------------------------------------------------------------------------------------------------------------------------------------------------------------------------------------------------------------------------------------------------------------------------------------------------------------------------------------------------------------------------------------------------------------------------------------------------------------------------------------------------------------------------------------------|
|  |  |  | <p>Phase 2: Activities started in December 2007 and renewed in December 2008. Phase II districts were East Godavari, West Godavari, Nalgonda, Rangareddy, and Chittoor<br/>n: 2004-05 = 2057 and 2007-08= 863</p> <p><b>Control Group (Andhra Pradesh)</b> that were not covered by Phases 1 and 2.<br/>2004-2005 (n)= 5269<br/>2007-2008 (n)= 2172</p> | <p>a. Region and state fixed effects:<br/>Phase 1: -5.325 (SE: 1.017)**, Phase 2: Not significant result</p> <p>b. With HH covariates in addition to region and state fixed effect:<br/>Phase 1: -5.111 (SE: 0.926)**, Phase 2: Not significant result</p> <p><i>1. Outpatient, outpatient drug and total expenditure</i> result was not significant for both, Phase 1 and 2</p> <p><b>B) South India sample</b></p> <p><i>1. Inpatient expenditure:</i></p> <p>a. Region and state fixed effects:<br/>Phase 1: -14.350 (SE: 4.005)**, Phase 2: Not significant result</p> <p>b. With HH covariates in addition to region and state fixed effect:</p> |
|--|--|--|---------------------------------------------------------------------------------------------------------------------------------------------------------------------------------------------------------------------------------------------------------------------------------------------------------------------------------------------------------|-------------------------------------------------------------------------------------------------------------------------------------------------------------------------------------------------------------------------------------------------------------------------------------------------------------------------------------------------------------------------------------------------------------------------------------------------------------------------------------------------------------------------------------------------------------------------------------------------------------------------------------------------------|

1  
2  
3  
4  
5  
6  
7  
8  
9  
10  
11  
12  
13  
14  
15  
16  
17  
18  
19  
20  
21  
22  
23  
24  
25  
26  
27  
28  
29  
30  
31  
32  
33  
34  
35  
36  
37  
38  
39  
40  
41  
42  
43  
44  
45  
46  
47

|  |  |  |                                                                                         |                                                                                                                                                                                                                                                                                                                                                                                                                                                                                                                                                                                                                                                                                               |
|--|--|--|-----------------------------------------------------------------------------------------|-----------------------------------------------------------------------------------------------------------------------------------------------------------------------------------------------------------------------------------------------------------------------------------------------------------------------------------------------------------------------------------------------------------------------------------------------------------------------------------------------------------------------------------------------------------------------------------------------------------------------------------------------------------------------------------------------|
|  |  |  | <p><b>Control Groups (All India)</b></p> <p>n= 2004-05: 116,136 and 2007-08: 46,814</p> | <p>Phase 1: -13.430 (SE: 3.791)**, Phase 2: Not significant result</p> <p><i>1. Inpatient drug expenditure</i></p> <p>a. Region and state fixed effects::</p> <p>Phase 1: -4.617 (SE: 1.143)**, Phase 2: Not significant result</p> <p>b. With HH covariates in addition to region and state fixed effect</p> <p>Phase 1: -4.310 (SE: 1.067)**, Phase 2: Not significant result</p> <p><i>1. Outpatient drug expenditure</i></p> <p>a. Region and state fixed effect:</p> <p>Phase 2: -7.120 (SE: 3.055)*, Phase 1: Not significant result</p> <p>b. With HH covariates in addition to region and state fixed effect:</p> <p>Phase 2: -7.211(SE: 3.201)*, Phase 1: Not significant result</p> |
|--|--|--|-----------------------------------------------------------------------------------------|-----------------------------------------------------------------------------------------------------------------------------------------------------------------------------------------------------------------------------------------------------------------------------------------------------------------------------------------------------------------------------------------------------------------------------------------------------------------------------------------------------------------------------------------------------------------------------------------------------------------------------------------------------------------------------------------------|

For peer review only

|    |  |  |  |  |
|----|--|--|--|--|
| 1  |  |  |  |  |
| 2  |  |  |  |  |
| 3  |  |  |  |  |
| 4  |  |  |  |  |
| 5  |  |  |  |  |
| 6  |  |  |  |  |
| 7  |  |  |  |  |
| 8  |  |  |  |  |
| 9  |  |  |  |  |
| 10 |  |  |  |  |
| 11 |  |  |  |  |
| 12 |  |  |  |  |
| 13 |  |  |  |  |
| 14 |  |  |  |  |
| 15 |  |  |  |  |
| 16 |  |  |  |  |
| 17 |  |  |  |  |
| 18 |  |  |  |  |
| 19 |  |  |  |  |
| 20 |  |  |  |  |
| 21 |  |  |  |  |
| 22 |  |  |  |  |
| 23 |  |  |  |  |
| 24 |  |  |  |  |
| 25 |  |  |  |  |
| 26 |  |  |  |  |
| 27 |  |  |  |  |
| 28 |  |  |  |  |
| 29 |  |  |  |  |
| 30 |  |  |  |  |
| 31 |  |  |  |  |
| 32 |  |  |  |  |
| 33 |  |  |  |  |
| 34 |  |  |  |  |
| 35 |  |  |  |  |
| 36 |  |  |  |  |
| 37 |  |  |  |  |
| 38 |  |  |  |  |
| 39 |  |  |  |  |
| 40 |  |  |  |  |
| 41 |  |  |  |  |
| 42 |  |  |  |  |
| 43 |  |  |  |  |
| 44 |  |  |  |  |
| 45 |  |  |  |  |
| 46 |  |  |  |  |
| 47 |  |  |  |  |

*1. Outpatient and total expenditure:* Result was not significant for both phases

**C) All India sample**

*1. Inpatient expenditure:*

a. Region and state fixed effects:

Phase 1:  $-11.304$  (SE: 1.717)\*\*, Phase 2: Not significant result

b. With HH covariates in addition to region and state fixed effects

Phase 1:  $-10.606$  (SE: 1.787)\*\*, Phase 2: Not significant result

*1. Inpatient drug expenditure*

a. Region and state fixed effects:

Phase 1:  $-3.669$  (SE: 0.664)\*\*, Phase 2: Not significant result

b. With HH covariates in addition to region and state fixed effects

1  
2  
3  
4  
5  
6  
7  
8  
9  
10  
11  
12  
13  
14  
15  
16  
17  
18  
19  
20  
21  
22  
23  
24  
25  
26  
27  
28  
29  
30  
31  
32  
33  
34  
35  
36  
37  
38  
39  
40  
41  
42  
43  
44  
45  
46  
47

|  |  |  |  |                                                                                                                                                                                                                                                                                                                                                                                                                                                                                                                                                                                                                                                                                                                                                                                                                     |
|--|--|--|--|---------------------------------------------------------------------------------------------------------------------------------------------------------------------------------------------------------------------------------------------------------------------------------------------------------------------------------------------------------------------------------------------------------------------------------------------------------------------------------------------------------------------------------------------------------------------------------------------------------------------------------------------------------------------------------------------------------------------------------------------------------------------------------------------------------------------|
|  |  |  |  | <p>Phase 1: <math>-3.517</math> (SE: 0.606)**, Phase 2: Not significant result</p> <p><i>1. Outpatient drug expenditure</i></p> <p>a. Region and state fixed effects:</p> <p>Phase 2: <math>-6.417</math> (SE: 2.747)*, Phase 1: Not significant result</p> <p>b. With HH covariates in addition to region and state fixed effects</p> <p>Phase 2: <math>-6.973</math> (SE: 2.837)*, Phase 1: Not significant result</p> <p><i>1. Outpatient and total expenditure:</i> Result was not significant for both phases</p> <p><b>Effect of Aarogyasri on impoverishment and CHE over 2004–2008</b></p> <p><b>A. Impoverishment:</b></p> <p>Results of intervention, South India and All India locations for both Phases (1 &amp;2) were statistically not significant, irrespective of using region and state fixed</p> |
|--|--|--|--|---------------------------------------------------------------------------------------------------------------------------------------------------------------------------------------------------------------------------------------------------------------------------------------------------------------------------------------------------------------------------------------------------------------------------------------------------------------------------------------------------------------------------------------------------------------------------------------------------------------------------------------------------------------------------------------------------------------------------------------------------------------------------------------------------------------------|

For peer review only

1  
2  
3  
4  
5  
6  
7  
8  
9  
10  
11  
12  
13  
14  
15  
16  
17  
18  
19  
20  
21  
22  
23  
24  
25  
26  
27  
28  
29  
30  
31  
32  
33  
34  
35  
36  
37  
38  
39  
40  
41  
42  
43  
44  
45  
46  
47

|  |  |  |  |                                                                                     |
|--|--|--|--|-------------------------------------------------------------------------------------|
|  |  |  |  | effects or using HH covariates in addition to region and state fixed effect models. |
|--|--|--|--|-------------------------------------------------------------------------------------|

**B. Impoverishment from OOPE:**

Results of intervention, South India and All India locations for both Phases (1 &2) were statistically not significant, irrespective of using region and state fixed effects or using HH covariates in addition to region and state fixed effect models.

**A. Total health expenditure  $\geq$  15% of total household expenditure:**

Phase 2 using region and state fixed effect model, DID for all India sample was:  $-0.041$  (SE:  $0.020$ )\*. Results of intervention and South India for both Phases (1 &2) were statistically not significant, irrespective of using region and state fixed effects or using HH covariates in addition to region and state fixed effect models. Result was not significant for phase 1 of All India locations using both models and



1  
2  
3  
4  
5  
6  
7  
8  
9  
10  
11  
12  
13  
14  
15  
16  
17  
18  
19  
20  
21  
22  
23  
24  
25  
26  
27  
28  
29  
30  
31  
32  
33  
34  
35  
36  
37  
38  
39  
40  
41  
42  
43  
44  
45  
46  
47

|  |  |  |  |                                                                                                                                                                                                                                                                                                                                                                                                                                                                                                                                                                                                                                                                                                                                                                                                                                                                                                                                                                                                                          |
|--|--|--|--|--------------------------------------------------------------------------------------------------------------------------------------------------------------------------------------------------------------------------------------------------------------------------------------------------------------------------------------------------------------------------------------------------------------------------------------------------------------------------------------------------------------------------------------------------------------------------------------------------------------------------------------------------------------------------------------------------------------------------------------------------------------------------------------------------------------------------------------------------------------------------------------------------------------------------------------------------------------------------------------------------------------------------|
|  |  |  |  | <p>for phase 2 using HH covariates in addition to region and state fixed effect model.</p> <p><b>B. Total health expend. <math>\geq 25\%</math> of non-food household expenditure</b></p> <p>Phase 2 using region and state fixed effect model, DID for all India sample was: <math>-0.043</math> (SE: <math>0.020</math>)*and using HH covariates in addition to region and state fixed effect model was <math>-0.042</math> (SE: <math>0.020</math>)*.</p> <p>Results of intervention and South India for both Phases (1 &amp;2) were statistically not significant, irrespective of using region and state fixed effects or using HH covariates in addition to region and state fixed effect models.</p> <p><b>C. Total health expend. <math>\geq 15\%</math> of total expend. and inpatient expend. <math>\geq 7.5\%</math></b></p> <p><b>a. Andhra Pradesh sample</b></p> <p>Phase 1: region and state fixed effect model: <math>-0.025</math> (SE: <math>0.010</math>)* and using HH covariates in addition to</p> |
|--|--|--|--|--------------------------------------------------------------------------------------------------------------------------------------------------------------------------------------------------------------------------------------------------------------------------------------------------------------------------------------------------------------------------------------------------------------------------------------------------------------------------------------------------------------------------------------------------------------------------------------------------------------------------------------------------------------------------------------------------------------------------------------------------------------------------------------------------------------------------------------------------------------------------------------------------------------------------------------------------------------------------------------------------------------------------|

For peer review only

|  |  |  |  |                                                                                                                                                                                                                                                                                                                                                                                                                                                                                                                                                                                                                                                                                                                                                                                                                                                                                                                                                                                            |
|--|--|--|--|--------------------------------------------------------------------------------------------------------------------------------------------------------------------------------------------------------------------------------------------------------------------------------------------------------------------------------------------------------------------------------------------------------------------------------------------------------------------------------------------------------------------------------------------------------------------------------------------------------------------------------------------------------------------------------------------------------------------------------------------------------------------------------------------------------------------------------------------------------------------------------------------------------------------------------------------------------------------------------------------|
|  |  |  |  | <p>region and state fixed effect models <math>-0.025</math><br/>(SE: 0.010)*. For Phase 2 it was not significant.</p> <p><b>b. South India sample</b></p> <p>Phase 1: region and state fixed effect model: <math>-0.029</math><br/>(SE: 0.013)* and using HH covariates in addition to<br/>region and state fixed effect models <math>-0.027</math><br/>(SE: 0.018)*. For Phase 2 it was not significant.</p> <p><b>c. All India sample</b></p> <p>Phase 1: region and state fixed effect model: <math>-0.030</math><br/>(SE: 0.012)* and using HH covariates in addition to<br/>region and state fixed effect models <math>-0.029</math><br/>(SE: 0.011)*.</p> <p>Phase 2: region and state fixed effect model: <math>-0.014</math><br/>(SE: 0.005)* and using HH covariates in addition to<br/>region and state fixed effect models <math>-0.014</math><br/>(SE: 0.000)*.</p> <p><b>Effect of Aarogyasri on prevalence of any health<br/>expenditure in household over 2004–2008</b></p> |
|--|--|--|--|--------------------------------------------------------------------------------------------------------------------------------------------------------------------------------------------------------------------------------------------------------------------------------------------------------------------------------------------------------------------------------------------------------------------------------------------------------------------------------------------------------------------------------------------------------------------------------------------------------------------------------------------------------------------------------------------------------------------------------------------------------------------------------------------------------------------------------------------------------------------------------------------------------------------------------------------------------------------------------------------|

1  
2  
3  
4  
5  
6  
7  
8  
9  
10  
11  
12  
13  
14  
15  
16  
17  
18  
19  
20  
21  
22  
23  
24  
25  
26  
27  
28  
29  
30  
31  
32  
33  
34  
35  
36  
37  
38  
39  
40  
41  
42  
43  
44  
45  
46  
47

|  |  |  |  |                                                                                                                                                                                                                                                                                                                                                                                                                                                                                                                                                                                                                                                                                                                                                                                                 |
|--|--|--|--|-------------------------------------------------------------------------------------------------------------------------------------------------------------------------------------------------------------------------------------------------------------------------------------------------------------------------------------------------------------------------------------------------------------------------------------------------------------------------------------------------------------------------------------------------------------------------------------------------------------------------------------------------------------------------------------------------------------------------------------------------------------------------------------------------|
|  |  |  |  | <p><b>A. Any health expenditure</b></p> <p><b>a. Andhra Pradesh sample</b></p> <p>Phase 1: region and state fixed effect model: -0.180 (SE: 0.021)** and using HH covariates in addition to region and state fixed effect models -0.164 (SE: 0.020)*. For Phase 2 it was not significant.</p> <p><b>b. South India sample</b></p> <p>Phase 1: region and state fixed effect model: -0.163 (SE: 0.068)* and using HH covariates in addition to region and state fixed effect models -0.150 (SE: 0.066)*. For Phase 2 it was not significant.</p> <p><b>c. All India sample</b></p> <p>Phase 1: region and state fixed effect model: -0.176 (SE: 0.060)* and using HH covariates in addition to region and state fixed effect models -0.167 (SE: 0.057)*. For Phase 2 it was not significant.</p> |
|--|--|--|--|-------------------------------------------------------------------------------------------------------------------------------------------------------------------------------------------------------------------------------------------------------------------------------------------------------------------------------------------------------------------------------------------------------------------------------------------------------------------------------------------------------------------------------------------------------------------------------------------------------------------------------------------------------------------------------------------------------------------------------------------------------------------------------------------------|

For peer review only

**B. Any inpatient expenditure****a. Andhra Pradesh sample**

For both Phases and using both model the result was not significant.

**b. South India sample**

Phase 1: region and state fixed effect model:  $-0.061$  (SE:  $0.022$ )\* and using HH covariates in addition to region and state fixed effect models  $-0.059$  (SE:  $0.023$ )\*. For Phase 2 it was not significant.

**c. All India sample**

Phase 1: region and state fixed effect model:  $-0.065$  (SE:  $0.020$ )\* and using HH covariates in addition to region and state fixed effect models  $-0.063$  (SE:  $0.020$ )\*. For Phase 2 it was not significant.

**C. Any outpatient expenditure****a. Andhra Pradesh sample**

1  
2  
3  
4  
5  
6  
7  
8  
9  
10  
11  
12  
13  
14  
15  
16  
17  
18  
19  
20  
21  
22  
23  
24  
25  
26  
27  
28  
29  
30  
31  
32  
33  
34  
35  
36  
37  
38  
39  
40  
41  
42  
43  
44  
45  
46  
47

|  |  |  |  |                                                                                                                                                                                                                                                                                                                                                                                                                                                                                                                                                                                                                                                                                                                                                                                                                                                                                                                       |
|--|--|--|--|-----------------------------------------------------------------------------------------------------------------------------------------------------------------------------------------------------------------------------------------------------------------------------------------------------------------------------------------------------------------------------------------------------------------------------------------------------------------------------------------------------------------------------------------------------------------------------------------------------------------------------------------------------------------------------------------------------------------------------------------------------------------------------------------------------------------------------------------------------------------------------------------------------------------------|
|  |  |  |  | <p>Phase 1: region and state fixed effect model: <math>-0.132</math><br/>(SE: 0.017)** and using HH covariates in addition to region and state fixed effect models <math>-0.116</math><br/>(SE: 0.013)*. For Phase 2 it was not significant.</p> <p><b>b. South India sample</b></p> <p>Phase 1: region and state fixed effect model:<br/><math>-0.138</math> (SE: 0.063)* and using HH covariates in addition to region and state fixed effect models <math>-0.125</math> (SE: 0.061)*. For Phase 2 it was not significant.</p> <p><b>c. All India sample</b></p> <p>Phase 1: region and state fixed effect model:<br/><math>-0.149</math> (SE: 0.059)* and using HH covariates in addition to region and state fixed effect models <math>-0.140</math> (SE: 0.056)*. For Phase 2 it was not significant.</p> <p><b>D. Any inpatient drug expenditure</b></p> <p><b>a. Andhra Pradesh and South India sample</b></p> |
|--|--|--|--|-----------------------------------------------------------------------------------------------------------------------------------------------------------------------------------------------------------------------------------------------------------------------------------------------------------------------------------------------------------------------------------------------------------------------------------------------------------------------------------------------------------------------------------------------------------------------------------------------------------------------------------------------------------------------------------------------------------------------------------------------------------------------------------------------------------------------------------------------------------------------------------------------------------------------|

|  |  |  |  |                                                                                                                                                                                                                                                                                                                                                                                                                                                                                                                                                                                                                                                                                                                                                                                                                                                |
|--|--|--|--|------------------------------------------------------------------------------------------------------------------------------------------------------------------------------------------------------------------------------------------------------------------------------------------------------------------------------------------------------------------------------------------------------------------------------------------------------------------------------------------------------------------------------------------------------------------------------------------------------------------------------------------------------------------------------------------------------------------------------------------------------------------------------------------------------------------------------------------------|
|  |  |  |  | <p>The result for both phases and using both models, was not statistically significant</p> <p><b>b. All India sample</b></p> <p>Phase 1: region and state fixed effect model: <math>-0.048</math> (SE: 0.021)* and using HH covariates in addition to region and state fixed effect models <math>-0.046</math> (SE: 0.021)*. For Phase 2 it was not significant.</p> <p><b>E. Any outpatient drug expenditure</b></p> <p><b>a. Andhra Pradesh sample</b></p> <p>Phase 1: region and state fixed effect model: <math>-0.100</math> (SE: 0.029)** and using HH covariates in addition to region and state fixed effect models <math>-0.084</math> (SE: 0.026)*. For Phase 2 it was not significant.</p> <p><b>b. South India sample</b></p> <p>Result for both phases and both models was not significant.</p> <p><b>c. All India sample</b></p> |
|--|--|--|--|------------------------------------------------------------------------------------------------------------------------------------------------------------------------------------------------------------------------------------------------------------------------------------------------------------------------------------------------------------------------------------------------------------------------------------------------------------------------------------------------------------------------------------------------------------------------------------------------------------------------------------------------------------------------------------------------------------------------------------------------------------------------------------------------------------------------------------------------|

1  
2  
3  
4  
5  
6  
7  
8  
9  
10  
11  
12  
13  
14  
15  
16  
17  
18  
19  
20  
21  
22  
23  
24  
25  
26  
27  
28  
29  
30  
31  
32  
33  
34  
35  
36  
37  
38  
39  
40  
41  
42  
43  
44  
45  
46  
47

|                                |                                                                              |                                                                                                                                                                                                                                                               |                                                                                                                                |                                                                                                                                                                                                                                                                                                                                                                                                                                                                                                                                                                                                        |
|--------------------------------|------------------------------------------------------------------------------|---------------------------------------------------------------------------------------------------------------------------------------------------------------------------------------------------------------------------------------------------------------|--------------------------------------------------------------------------------------------------------------------------------|--------------------------------------------------------------------------------------------------------------------------------------------------------------------------------------------------------------------------------------------------------------------------------------------------------------------------------------------------------------------------------------------------------------------------------------------------------------------------------------------------------------------------------------------------------------------------------------------------------|
|                                |                                                                              |                                                                                                                                                                                                                                                               |                                                                                                                                | Phase 1: region and state fixed effect model:<br><br>-0.125 (SE: 0.056)* and using HH covariates in addition to region and state fixed effect models -0.116 (SE: 0.053)*. For Phase 2 it was not significant.                                                                                                                                                                                                                                                                                                                                                                                          |
| <b>Ghosh &amp; Gupta, 2017</b> | Impact evaluation: Coarsened exact matching and, linear and logit regression | National Sample Survey data: 18 states, which do not have additional state funded insurance (round not reported). States having specific PFHIs, union territories not exposed to RSBY and states not having functional RSBY in the year 2014-15 were excluded | PFHI covered: RSBY<br><br><b>Treated group:</b> Household having at least one person enrolled in RSBY. <b>Control:</b> no RSBY | 1) <b>OOPs on all OP visits:</b> no statistically significant difference between RSBY insured & uninsured households in terms of OOP expenditure on OP visits i.e. SATT=-1014.12 (p=0.097)<br><br>2) Incidence of <b>catastrophic expenditure for OP care:</b> OR= 0.64 (p=0.23)<br><br>3) <b>OOPs on all IP visits:</b> no statistically significant difference between RSBY insured & uninsured households in terms of OOP expenditure on inpatient visits I.e. SATT=-6122.37 (p=0.063)<br><br>4) the probability of <b>incurring zero OOP expenditure on IP care</b> is not statistically different |

|                          |                                                                                                                                                                                      |                                                                                                                                                  |                                                                                                                                                                 |                                                                                                                                                                                                                                                                                                                                                                                                                                         |
|--------------------------|--------------------------------------------------------------------------------------------------------------------------------------------------------------------------------------|--------------------------------------------------------------------------------------------------------------------------------------------------|-----------------------------------------------------------------------------------------------------------------------------------------------------------------|-----------------------------------------------------------------------------------------------------------------------------------------------------------------------------------------------------------------------------------------------------------------------------------------------------------------------------------------------------------------------------------------------------------------------------------------|
|                          |                                                                                                                                                                                      |                                                                                                                                                  |                                                                                                                                                                 | <p>between the RSBY-insured and uninsured families i.e. OR= 1.75 (p=0.127)</p> <p>5) Incidence of <b>catastrophic expenditure for IP care</b>: OR= 0.86 (p=0.5).</p> <p>6) <b>Impoverishment due to OOP on IP care</b>: SATT= 0.83 (p=0.663)</p> <p>7) <b>Total OOP spending</b>: SATT= -550.47 (p=0.067)</p> <p>8) Incidence of catastrophic expenditure: OR= 0.76 (p=0.130)</p> <p>9) <b>Impoverishment</b>: SATT= 0.96 (p=0.896)</p> |
| <p><b>Garg, 2020</b></p> | <p>Impact evaluation using NSS survey 2004 when there was no PFHI, and 2014 data (for older PFHI scheme) and primary household survey in 2019 (for data related to the effect of</p> | <p>NSS survey data</p> <p>Multivariate analysis to see the effect of PMJAY on CHE and OOPE</p> <p>OLS model for continuous outcome available</p> | <p>PFHI covered: PMJAY scheme introduced in the year 2018.</p> <p>The study also mentions other PFHI schemes like MSBY and RSBY operational in Chhattisgarh</p> | <p><b>1) OOPE and financial protection</b></p> <p>A) Mean OOPE for Hospitalization Episodes (in INR)</p> <p>Public= 3078 (95% CI1928–4228)</p> <p>Private= 19,375 (95% CI11305–27,447)</p> <p>B) Median OOPE for Hospitalization Episodes (in INR)</p> <p>Public= 530 (95% CI 379–758)</p> <p>Private= 7299 (95% CI 3788–9032)</p>                                                                                                      |



1  
2  
3  
4  
5  
6  
7  
8  
9  
10  
11  
12  
13  
14  
15  
16  
17  
18  
19  
20  
21  
22  
23  
24  
25  
26  
27  
28  
29  
30  
31  
32  
33  
34  
35  
36  
37  
38  
39  
40  
41  
42  
43  
44  
45  
46  
47

|  |                                                                              |                                                                                                                                                                                                                                                                               |  |                                                                                                                                                                                                                                                                                                                                                                                                                                                                                                                                                                                                                                                                                                                                                                                                               |
|--|------------------------------------------------------------------------------|-------------------------------------------------------------------------------------------------------------------------------------------------------------------------------------------------------------------------------------------------------------------------------|--|---------------------------------------------------------------------------------------------------------------------------------------------------------------------------------------------------------------------------------------------------------------------------------------------------------------------------------------------------------------------------------------------------------------------------------------------------------------------------------------------------------------------------------------------------------------------------------------------------------------------------------------------------------------------------------------------------------------------------------------------------------------------------------------------------------------|
|  | <p>first year of implementing PMJAY) in the state of Chhattisgarh, India</p> | <p>and Probit model for binary outcome variable. Compared with ATT under Propensity Score Matching or PSM</p> <p>Multivariate analysis was repeated for OOPE and CHE using IV approach. For OOPE 2sls was applied as IV model, and for CHE two step IV Probit was applied</p> |  | <p>C) Proportion of incurred CHE25 for Hospitalization Episode (%)</p> <p>Public= 7.6 (95% CI 4.5–11.0)</p> <p>Private= 43.6 (95% CI 36.3–51.4)</p> <p><b>2) Effect of enrolment in PMJAY and other PFHI on OOPE and CHE</b></p> <p>A) OLS model (for continuous outcome variable)</p> <p>OOPE (PMJAY)= coeff – 4287 (p=0.09)</p> <p>OOPE (PFHI)= coeff. –87 (p=0.97)</p> <p>Log of OOPE (PMJAY)= coeff. –0.45 (p&lt; 0.01)</p> <p>Log of OOPE (PFHI)= coeff. –0.34 (p &lt; 0.01)</p> <p>B) Probit Model (for binary outcome variable)</p> <p>CHE 10 (PMJAY)= coeff. 0.08 (p=0.35)</p> <p>CHE10 (PFHI)= coeff. –0.07 (p=0.29)</p> <p>CHE25 (PMJAY) =coeff. 0.22 (p= 0.01)</p> <p>CHE25 (PFHI)= coeff. 0.04 (p= 0.56)</p> <p>CHE40 (PMJAY)= coeff. 0.26 (p=0.01)</p> <p>CHE40 (PFHI)= coeff. 0.05 (p=0.55)</p> |
|--|------------------------------------------------------------------------------|-------------------------------------------------------------------------------------------------------------------------------------------------------------------------------------------------------------------------------------------------------------------------------|--|---------------------------------------------------------------------------------------------------------------------------------------------------------------------------------------------------------------------------------------------------------------------------------------------------------------------------------------------------------------------------------------------------------------------------------------------------------------------------------------------------------------------------------------------------------------------------------------------------------------------------------------------------------------------------------------------------------------------------------------------------------------------------------------------------------------|

|    |  |  |  |                                             |
|----|--|--|--|---------------------------------------------|
| 1  |  |  |  | C) PSM model (ATT)                          |
| 2  |  |  |  | OOPE (PMJAY)= coeff. - 4614 (p=0.20)        |
| 3  |  |  |  | OOPE (PFHI)= coeff. - 1066 (p=0.73)         |
| 4  |  |  |  | Log of OOPE (PMJAY)= coeff. -0.37 (p< 0.01) |
| 5  |  |  |  | Log of OOPE (PFHI)= coeff. - 0.50 (p< 0.01) |
| 6  |  |  |  | CHE10 (PMJAY)= coeff. 0.02 (p=0.52)         |
| 7  |  |  |  | CHE10 (PFHI)= coeff. 0.003 (p=0.90)         |
| 8  |  |  |  | CHE25 (PMJAY)= coeff. 0.05 (p=0.08)         |
| 9  |  |  |  | CHE25 (PFHI)= coeff. 0.02 (p=0.33)          |
| 10 |  |  |  | CHE40 (PMJAY)= coeff. 0.04 (p=0.14)         |
| 11 |  |  |  | CHE40 (PFHI)= coeff. 0.01 (p=0.36)          |
| 12 |  |  |  | D) IV model                                 |
| 13 |  |  |  | OOPE (PMJAY)= coeff. 48,734 (p=0.59)        |
| 14 |  |  |  | OOPE (PFHI)= coeff. 17,315 (p=0.72)         |
| 15 |  |  |  | Log of OOPE (PMJAY)= coeff. -0.48 (p=0.86)  |
| 16 |  |  |  | Log of OOPE (PFHI)= coeff. 1.01 (p=0.53)    |
| 17 |  |  |  | CHE10 (PMJAY)= coeff. -4.39 (p=0.28)        |
| 18 |  |  |  | CHE10 (PFHI)= coeff. -2.23 (p=0.23)         |
| 19 |  |  |  |                                             |
| 20 |  |  |  |                                             |
| 21 |  |  |  |                                             |
| 22 |  |  |  |                                             |
| 23 |  |  |  |                                             |
| 24 |  |  |  |                                             |
| 25 |  |  |  |                                             |
| 26 |  |  |  |                                             |
| 27 |  |  |  |                                             |
| 28 |  |  |  |                                             |
| 29 |  |  |  |                                             |
| 30 |  |  |  |                                             |
| 31 |  |  |  |                                             |
| 32 |  |  |  |                                             |
| 33 |  |  |  |                                             |
| 34 |  |  |  |                                             |
| 35 |  |  |  |                                             |
| 36 |  |  |  |                                             |
| 37 |  |  |  |                                             |
| 38 |  |  |  |                                             |
| 39 |  |  |  |                                             |
| 40 |  |  |  |                                             |
| 41 |  |  |  |                                             |
| 42 |  |  |  |                                             |
| 43 |  |  |  |                                             |
| 44 |  |  |  |                                             |
| 45 |  |  |  |                                             |
| 46 |  |  |  |                                             |
| 47 |  |  |  |                                             |

|                                                 |                                                                         |                                                                                                                                                                                                                                                                                                                                 |                                                                                                                                                                                                                                                                   |                                                                                                                                                                                                                                                                                                                                                                                                                                                                                                                                      |
|-------------------------------------------------|-------------------------------------------------------------------------|---------------------------------------------------------------------------------------------------------------------------------------------------------------------------------------------------------------------------------------------------------------------------------------------------------------------------------|-------------------------------------------------------------------------------------------------------------------------------------------------------------------------------------------------------------------------------------------------------------------|--------------------------------------------------------------------------------------------------------------------------------------------------------------------------------------------------------------------------------------------------------------------------------------------------------------------------------------------------------------------------------------------------------------------------------------------------------------------------------------------------------------------------------------|
|                                                 |                                                                         |                                                                                                                                                                                                                                                                                                                                 |                                                                                                                                                                                                                                                                   | CHE25 (PMJAY)= coeff. -2.03 (p=0.54)<br>CHE25 (PFHI)= coeff. -1.28 (p=0.48)<br>CHE40 (PMJAY)= coeff. -0.67 (p=0.85)<br>CHE40 (PFHI)= coeff. -0.68 (p=0.74)                                                                                                                                                                                                                                                                                                                                                                           |
| <b>Garg, Chowdhury &amp; Sundararaman, 2019</b> | Secondary data analysis of the two rounds of NSS cross-sectional survey | The 60 <sup>th</sup> round of NSSO (2004) and 71 <sup>st</sup> round of NSSO (2014) in three states of Andhra Pradesh, Karnataka and Tamil Nadu.<br><br>Instrument Variable (IV) method was used in the multivariate analysis<br><br>Two-step least square (2sls) for OOPE and Two-step IV Probit model for Utilization and CHE | PFHI covered: The three Public Funded Health Insurance (PFHI) Schemes operational in Andhra Pradesh (Rajiv Arogyashree or the NTR Vaidya Seva); Karnataka (Vajpayee Arogya Shree); Tamil Nadu (Tamil Nadu Chief Minister’s Comprehensive Health Insurance Scheme) | <b>A) Mean OOPE for hospitalization episodes (in INR) Andhra Pradesh</b><br><br>2004: Public Hospital 5042 (95% CI=4110–5976); Private hospital 19,657 (95% CI=17302–22,013)<br><br>2014:<br>PFHI enrolled: Public hospital 2864 (95% CI=1725–4004); Private hospital 15,827 (95% CI=14570–17,084)<br><br>Non enrolled: Public hospital 2355 (95% CI=1714–2998); Private hospital 17,934 (15676–20,194)<br><br><b>Karnataka:</b><br><br>2004: Public hospital 4511 (95% CI=3794–5229); Private hospital 18,085 (95% CI=16111–20,058) |

1  
2  
3  
4  
5  
6  
7  
8  
9  
10  
11  
12  
13  
14  
15  
16  
17  
18  
19  
20  
21  
22  
23  
24  
25  
26  
27  
28  
29  
30  
31  
32  
33  
34  
35  
36  
37  
38  
39  
40  
41  
42  
43  
44  
45  
46  
47

|  |  |  |                                                                        |                                                                                                                                                                                                                                                                                                                                                                                                                                                                                                                                                                                                                                                                                                                                                       |
|--|--|--|------------------------------------------------------------------------|-------------------------------------------------------------------------------------------------------------------------------------------------------------------------------------------------------------------------------------------------------------------------------------------------------------------------------------------------------------------------------------------------------------------------------------------------------------------------------------------------------------------------------------------------------------------------------------------------------------------------------------------------------------------------------------------------------------------------------------------------------|
|  |  |  | <p>The pre PFHI in 2004 and post PFHI (2014) comparisons were made</p> | <p>2014:<br/>                 PFHI enrolled: Public hospital 2888 (95% CI=1551–4226); Private hospital 16,121 (95% CI=12482–19,760)<br/>                 Non enrolled: Public hospital 3556 (95% CI=3030–4082); Private hospital 17,873 (95% CI=16489–19,258)<br/> <b>Tamil Nadu</b><br/>                 2004: Public hospital 3291 (95% CI=1873–4710); private hospital 24,637 (95% CI=20752–28,522)<br/>                 2014:<br/>                 PFHI enrolled: Public hospital 802 (95% CI=611–993); Private hospital 23,966 (95% CI=21060–26,872)<br/>                 Non enrolled: Public hospital 954 (95% CI=788–1120); private hospital 26,425 (95% CI=24140–28,711)<br/> <b>B) Median OOPE for hospitalization episode (in INR)</b></p> |
|--|--|--|------------------------------------------------------------------------|-------------------------------------------------------------------------------------------------------------------------------------------------------------------------------------------------------------------------------------------------------------------------------------------------------------------------------------------------------------------------------------------------------------------------------------------------------------------------------------------------------------------------------------------------------------------------------------------------------------------------------------------------------------------------------------------------------------------------------------------------------|

1  
2  
3  
4  
5  
6  
7  
8  
9  
10  
11  
12  
13  
14  
15  
16  
17  
18  
19  
20  
21  
22  
23  
24  
25  
26  
27  
28  
29  
30  
31  
32  
33  
34  
35  
36  
37  
38  
39  
40  
41  
42  
43  
44  
45  
46  
47

|  |  |  |  |                                                                                                                                                                                                                                                                                                                                                                                                                                                                                                                                                                                                                                                                                                                   |
|--|--|--|--|-------------------------------------------------------------------------------------------------------------------------------------------------------------------------------------------------------------------------------------------------------------------------------------------------------------------------------------------------------------------------------------------------------------------------------------------------------------------------------------------------------------------------------------------------------------------------------------------------------------------------------------------------------------------------------------------------------------------|
|  |  |  |  | <p><b>Andhra Pradesh</b></p> <p>2004: Public Hospital 1660 (95%CI=1461–1853);<br/>Private hospital 9900 (95%CI=9020–10,719)</p> <p>2014:</p> <p>PFHI enrolled: Public Hospital 600 (95%CI=500–850); Private hospital 10,493 (95%CI=9894–11,303)</p> <p>Non enrolled: Public hospital 925 (95%CI=600–1140); Private hospital 12,130 (95%CI=10990–13,500)</p> <p><b>Karnataka</b></p> <p>2004: Public hospital 2027 (95%CI=1667–2437);<br/>private hospital 8800 (95%CI=7700–9612)</p> <p>2014</p> <p>PFHI enrolled: Public hospital 1140 (95%CI=817–1914); private hospital 8800 (95%CI=7239–10,835)</p> <p>Non-enrolled: Public Hospital 1975 (95%CI=1700–2250); private hospital 10,625 (95%CI=10000–11,400)</p> |
|--|--|--|--|-------------------------------------------------------------------------------------------------------------------------------------------------------------------------------------------------------------------------------------------------------------------------------------------------------------------------------------------------------------------------------------------------------------------------------------------------------------------------------------------------------------------------------------------------------------------------------------------------------------------------------------------------------------------------------------------------------------------|

For peer review only

|    |  |  |  |                                                       |
|----|--|--|--|-------------------------------------------------------|
| 1  |  |  |  | <b>Tamil Nadu</b>                                     |
| 2  |  |  |  | 2004: Public Hospital 535 (95% CI=466–629); private   |
| 3  |  |  |  | hospital 10,718 (95% CI=9602–11,271)                  |
| 4  |  |  |  | 2014                                                  |
| 5  |  |  |  | PFHI enrolled: Public hospital 370 (95% CI=300–       |
| 6  |  |  |  | 500); private hospital 15,450 (95% CI=13900–17,584)   |
| 7  |  |  |  | Non-enrolled: Public hospital 350 (95% CI=300–400);   |
| 8  |  |  |  | private hospital 15,095 (95% CI=14000–15,771)         |
| 9  |  |  |  | <b>C) Proportion of individuals incurred CHE25</b>    |
| 10 |  |  |  | <b>(Catastrophic Health expenditure 25% of annual</b> |
| 11 |  |  |  | <b>household consumption expenditure) for</b>         |
| 12 |  |  |  | <b>Hospitalization Episode (%)</b>                    |
| 13 |  |  |  | <b>Andhra Pradesh</b>                                 |
| 14 |  |  |  | 2004: Public 6.4 (95% CI=4.6–8.2); private 24.7       |
| 15 |  |  |  | (95% CI=22.6–26.8)                                    |
| 16 |  |  |  | 2014:                                                 |
| 17 |  |  |  | For PFHI enrolled: Public 2.7 (95% CI=1.1–4.4);       |
| 18 |  |  |  | Private 17.7 (95% CI=15.3–20.1)                       |
| 19 |  |  |  |                                                       |
| 20 |  |  |  |                                                       |
| 21 |  |  |  |                                                       |
| 22 |  |  |  |                                                       |
| 23 |  |  |  |                                                       |
| 24 |  |  |  |                                                       |
| 25 |  |  |  |                                                       |
| 26 |  |  |  |                                                       |
| 27 |  |  |  |                                                       |
| 28 |  |  |  |                                                       |
| 29 |  |  |  |                                                       |
| 30 |  |  |  |                                                       |
| 31 |  |  |  |                                                       |
| 32 |  |  |  |                                                       |
| 33 |  |  |  |                                                       |
| 34 |  |  |  |                                                       |
| 35 |  |  |  |                                                       |
| 36 |  |  |  |                                                       |
| 37 |  |  |  |                                                       |
| 38 |  |  |  |                                                       |
| 39 |  |  |  |                                                       |
| 40 |  |  |  |                                                       |
| 41 |  |  |  |                                                       |
| 42 |  |  |  |                                                       |
| 43 |  |  |  |                                                       |
| 44 |  |  |  |                                                       |
| 45 |  |  |  |                                                       |
| 46 |  |  |  |                                                       |
| 47 |  |  |  |                                                       |

1  
2  
3  
4  
5  
6  
7  
8  
9  
10  
11  
12  
13  
14  
15  
16  
17  
18  
19  
20  
21  
22  
23  
24  
25  
26  
27  
28  
29  
30  
31  
32  
33  
34  
35  
36  
37  
38  
39  
40  
41  
42  
43  
44  
45  
46  
47

|  |  |  |  |                                                                                                                                                                                                                                                                                                                                                                                                                                                                                                                                                                                                                                     |
|--|--|--|--|-------------------------------------------------------------------------------------------------------------------------------------------------------------------------------------------------------------------------------------------------------------------------------------------------------------------------------------------------------------------------------------------------------------------------------------------------------------------------------------------------------------------------------------------------------------------------------------------------------------------------------------|
|  |  |  |  | <p>Non enrolled: Public 1.7 (95% CI=0–3.5); private 17.1 (95% CI=14.5–19.8)</p> <p><b>Karnataka</b></p> <p>2004: public 5.1 (95%CI=3.2–7.0); private 23.9 (95% CI=21.2–26.6)</p> <p>2014</p> <p>For PFHI enrolled: Public 2.2 (95%CI=0–5.8); private 20.0 (95%CI=13.1–26.9)</p> <p>Non enrolled: Public 3.1 (95%CI=1.9–4.4); 22.6 (95%CI=20.6–24.5)</p> <p><b>Tamil Nadu</b></p> <p>2004: Public 2.4 (95% CI=1.5–3.4); private 27.4 (95% CI=25.2–29.7)</p> <p>2014</p> <p>For PFHI enrolled: Public 0 (95%CI=0–0); private 27.2 (95%CI=23.1–31.4)</p> <p>Non-enrolled: Public 0.3 (95%CI=0–0.6); private 29.3 (95%CI=27.2–31.5)</p> |
|--|--|--|--|-------------------------------------------------------------------------------------------------------------------------------------------------------------------------------------------------------------------------------------------------------------------------------------------------------------------------------------------------------------------------------------------------------------------------------------------------------------------------------------------------------------------------------------------------------------------------------------------------------------------------------------|

For peer review only

|  |  |  |  |                                                                                                                                                                                                                                                                                                                                                                                                                                                                                                                                                                                                                                                            |
|--|--|--|--|------------------------------------------------------------------------------------------------------------------------------------------------------------------------------------------------------------------------------------------------------------------------------------------------------------------------------------------------------------------------------------------------------------------------------------------------------------------------------------------------------------------------------------------------------------------------------------------------------------------------------------------------------------|
|  |  |  |  | <p><b>D) Proportion of individuals incurred CHE40 for hospitalization episode (%)</b></p> <p><b>Andhra Pradesh</b></p> <p>2004: Public 3 (95% CI=1.7–4.2); private 13.7 (95% CI=12.0–15.4)</p> <p>2014</p> <p>For PFHI enrolled: Public 0.2 (95% CI=0–0.7); private 9.4 (95% CI=7.6–11.3)</p> <p>Non-enrolled: Public 0 (95% CI=0–0); private 8.7 (95% CI=6.7–10.7)</p> <p><b>Karnataka</b></p> <p>2004: Public 2.6 (95% CI=1.2–4.0); private 12.5 (95% CI=10.3–14.6)</p> <p>2014:</p> <p>For PFHI enrolled: Public 0.8 (95% CI=0–3); private 11.3 (95% CI=5.8–16.8)</p> <p>Non-enrolled: Public 1.7 (95% CI=0.8–2.6); private 11.8 (95% CI=10.3–13.3)</p> |
|--|--|--|--|------------------------------------------------------------------------------------------------------------------------------------------------------------------------------------------------------------------------------------------------------------------------------------------------------------------------------------------------------------------------------------------------------------------------------------------------------------------------------------------------------------------------------------------------------------------------------------------------------------------------------------------------------------|



1  
2  
3  
4  
5  
6  
7  
8  
9  
10  
11  
12  
13  
14  
15  
16  
17  
18  
19  
20  
21  
22  
23  
24  
25  
26  
27  
28  
29  
30  
31  
32  
33  
34  
35  
36  
37  
38  
39  
40  
41  
42  
43  
44  
45  
46  
47

|  |  |  |  |                                                                                                                                                                                                                                                                                                                                                                                                                                                                                                                                                                                                                                                   |
|--|--|--|--|---------------------------------------------------------------------------------------------------------------------------------------------------------------------------------------------------------------------------------------------------------------------------------------------------------------------------------------------------------------------------------------------------------------------------------------------------------------------------------------------------------------------------------------------------------------------------------------------------------------------------------------------------|
|  |  |  |  | <p><b>Tamil Nadu</b></p> <p>2004: Public 1.5 (95%CI=0.7–2.2); private 17 (95%CI=15.1–18.9)</p> <p>2014</p> <p>For PFHI enrolled: Public 0 (95%CI=0–0); private 14.7 (95%CI=11.4–18.0)</p> <p>Non-enrolled: Public 0 (95%CI=0–0); 14.4 (95%CI=12.7–16.0)</p> <p><b>E) Proportion of individuals incurred CHE10 for hospitalization episode (%)</b></p> <p><b>Andhra Pradesh</b></p> <p>2004: Public 17.9 (95%CI=15.1-20.7); private 53.6 (95%CI=51.2 – 56.1)</p> <p>2014</p> <p>For PFHI enrolled: Public 8.7 (95% CI=5.8-11.6); private 51 (95%CI=47.8-54.2)</p> <p>Non-enrolled: Public 7.3 (95%CI=3.5-11.2); private 50.9 (95%CI=47.4-54.4)</p> |
|--|--|--|--|---------------------------------------------------------------------------------------------------------------------------------------------------------------------------------------------------------------------------------------------------------------------------------------------------------------------------------------------------------------------------------------------------------------------------------------------------------------------------------------------------------------------------------------------------------------------------------------------------------------------------------------------------|

For peer review only

1  
2  
3  
4  
5  
6  
7  
8  
9  
10  
11  
12  
13  
14  
15  
16  
17  
18  
19  
20  
21  
22  
23  
24  
25  
26  
27  
28  
29  
30  
31  
32  
33  
34  
35  
36  
37  
38  
39  
40  
41  
42  
43  
44  
45  
46  
47

|  |  |  |  |                                                                                                                                                                                                                                                                                                                                                                                                                                                                                                                                                                                                                                        |
|--|--|--|--|----------------------------------------------------------------------------------------------------------------------------------------------------------------------------------------------------------------------------------------------------------------------------------------------------------------------------------------------------------------------------------------------------------------------------------------------------------------------------------------------------------------------------------------------------------------------------------------------------------------------------------------|
|  |  |  |  | <p><b>Karnataka</b></p> <p>2004: Public 20.3 (95%CI=16.8-23.8); private 49.6 (95%CI=46.5-52.8)</p> <p>2014</p> <p>For PFHI enrolled: Public 8 (95%CI=1.4-14.5); private 43.1 (95%CI=34.5-51.7)</p> <p>Non-enrolled: Public 11.5 (95%CI=9.3-13.9); private 53.2 (95%CI=50.9-55.5)</p> <p><b>Tamil Nadu</b></p> <p>2004: Public 8 (95%CI=6.3-9.7); private 50 (95%CI=47.4-52.5)</p> <p>2014</p> <p>For PFHI enrolled: Public 0.7 (95%CI=0-1.9); Private 59.3 (95%CI=54.7-63.9)</p> <p>Non enrolled: Public 1.2 (95%CI=0.6-1.8); private 58.3 (95%CI=55.9-60.6)</p> <p><b>F) 2sls regression for size of OOPE for hospitalization</b></p> |
|--|--|--|--|----------------------------------------------------------------------------------------------------------------------------------------------------------------------------------------------------------------------------------------------------------------------------------------------------------------------------------------------------------------------------------------------------------------------------------------------------------------------------------------------------------------------------------------------------------------------------------------------------------------------------------------|

1  
2  
3  
4  
5  
6  
7  
8  
9  
10  
11  
12  
13  
14  
15  
16  
17  
18  
19  
20  
21  
22  
23  
24  
25  
26  
27  
28  
29  
30  
31  
32  
33  
34  
35  
36  
37  
38  
39  
40  
41  
42  
43  
44  
45  
46  
47

|  |  |  |  |                                                                                                                                                                                                                                                                                                                                                                                                                                                                                                                                                                                                                                                                                                   |
|--|--|--|--|---------------------------------------------------------------------------------------------------------------------------------------------------------------------------------------------------------------------------------------------------------------------------------------------------------------------------------------------------------------------------------------------------------------------------------------------------------------------------------------------------------------------------------------------------------------------------------------------------------------------------------------------------------------------------------------------------|
|  |  |  |  | <p>PFHI enrolment was not associated with the size of OOPE in any of the three states</p> <p>Andhra Pradesh</p> <p>Government insurance(yes)= coeff 2944.541 (SE= 35372.290, 95% CI= -66383.880 to 72272.960)</p> <p>Karnataka</p> <p>Government insurance (yes)= coeff 45744.550 (SE= 34789.840; 95% CI= -22442.280 to 113931.400)</p> <p>Tamil Nadu</p> <p>Government insurance (yes)= coef 63942.380(SE= 49332.880; 95% CI= - 32748.280 to 160633.000)</p> <p><b>G) Association between government insurance and CHE25</b></p> <p>Enrolment in PFHI schemes was not significantly associated with incidence of CH25</p> <p>Andhra Pradesh: coef 1.407(SE= 0.881; 95% CI= - 0.319 TO 3.134)</p> |
|--|--|--|--|---------------------------------------------------------------------------------------------------------------------------------------------------------------------------------------------------------------------------------------------------------------------------------------------------------------------------------------------------------------------------------------------------------------------------------------------------------------------------------------------------------------------------------------------------------------------------------------------------------------------------------------------------------------------------------------------------|

For peer review only

|    |  |  |  |                                                        |
|----|--|--|--|--------------------------------------------------------|
| 1  |  |  |  |                                                        |
| 2  |  |  |  |                                                        |
| 3  |  |  |  | Karnataka: coef 2.463 (SE= 2.279; 95%CI= -2.003 to     |
| 4  |  |  |  | 6.929)                                                 |
| 5  |  |  |  | Tamil Nadu: coef 1.58(SE= 1.859; 95%CI= -2.063 to      |
| 6  |  |  |  | 5.223)                                                 |
| 7  |  |  |  |                                                        |
| 8  |  |  |  | <b>H) Association between government insurance and</b> |
| 9  |  |  |  | <b>CHE40</b>                                           |
| 10 |  |  |  | Enrolment in PFHI schemes was not significantly        |
| 11 |  |  |  | associated with incidence of CHE40 in all the three    |
| 12 |  |  |  | states                                                 |
| 13 |  |  |  |                                                        |
| 14 |  |  |  | Andhra Pradesh: coef -1.788 (SE= 1.171; 95%CI= -       |
| 15 |  |  |  | 4.084 to 0.508)                                        |
| 16 |  |  |  |                                                        |
| 17 |  |  |  | Karnataka: coef. 0.788 (SE= 2.668; 95%CI= -4.440 to    |
| 18 |  |  |  | 6.016)                                                 |
| 19 |  |  |  |                                                        |
| 20 |  |  |  | Tamil Nadu: coef. 1.653 (SE= 2.099; 95%CI= -2.462      |
| 21 |  |  |  | to 5.768)                                              |
| 22 |  |  |  |                                                        |
| 23 |  |  |  | <b>I) Association between government insurance and</b> |
| 24 |  |  |  | <b>CHE10</b>                                           |
| 25 |  |  |  |                                                        |
| 26 |  |  |  |                                                        |
| 27 |  |  |  |                                                        |
| 28 |  |  |  |                                                        |
| 29 |  |  |  |                                                        |
| 30 |  |  |  |                                                        |
| 31 |  |  |  |                                                        |
| 32 |  |  |  |                                                        |
| 33 |  |  |  |                                                        |
| 34 |  |  |  |                                                        |
| 35 |  |  |  |                                                        |
| 36 |  |  |  |                                                        |
| 37 |  |  |  |                                                        |
| 38 |  |  |  |                                                        |
| 39 |  |  |  |                                                        |
| 40 |  |  |  |                                                        |
| 41 |  |  |  |                                                        |
| 42 |  |  |  |                                                        |
| 43 |  |  |  |                                                        |
| 44 |  |  |  |                                                        |
| 45 |  |  |  |                                                        |
| 46 |  |  |  |                                                        |
| 47 |  |  |  |                                                        |

1  
2  
3  
4  
5  
6  
7  
8  
9  
10  
11  
12  
13  
14  
15  
16  
17  
18  
19  
20  
21  
22  
23  
24  
25  
26  
27  
28  
29  
30  
31  
32  
33  
34  
35  
36  
37  
38  
39  
40  
41  
42  
43  
44  
45  
46  
47

|  |  |  |  |                                                                                                                                                                                                                                                                                                                                                                                                                                                                                                                                                                                                                                                                                                                       |
|--|--|--|--|-----------------------------------------------------------------------------------------------------------------------------------------------------------------------------------------------------------------------------------------------------------------------------------------------------------------------------------------------------------------------------------------------------------------------------------------------------------------------------------------------------------------------------------------------------------------------------------------------------------------------------------------------------------------------------------------------------------------------|
|  |  |  |  | <p>Enrolment in PFHI schemes was not significantly associated with incidence of CHE10 in all the three states</p> <p>Andhra Pradesh: coef. -1.35178 (SE= 0.8440585; 95% CI= -3.006104 to 0.3025442)</p> <p>Karnataka= coef. 3.546654 (SE= 6.232684; 95% CI= -8.669182 to 15.76249)</p> <p>Tamil Nadu: coef. 1.039547(SE= 1.048903; 95% CI= -1.016266 to 3.09536)</p> <p><b>J) Association between PFHI enrolment and OOPE</b></p> <p>Andhra Pradesh: coef. - 5374 (p&lt;0.001)</p> <p>Karnataka: coef. -4064 (p&lt;0.05)</p> <p>Tamil Nadu: coef. 2665 (p&gt;0.05)</p> <p><b>K) Association between PFHI enrolment and CHE 10</b></p> <p>Andhra Pradesh: -0.235 (p&lt;0.001)</p> <p>Karnataka: -0.153 (p&gt;0.05)</p> |
|--|--|--|--|-----------------------------------------------------------------------------------------------------------------------------------------------------------------------------------------------------------------------------------------------------------------------------------------------------------------------------------------------------------------------------------------------------------------------------------------------------------------------------------------------------------------------------------------------------------------------------------------------------------------------------------------------------------------------------------------------------------------------|

|                                                 |                                                               |                                                                                                                                                            |                                                                                                                                           |                                                                                                                                                                                                                                                                                                                                                                                                                                                                                                                                                                                                                                  |
|-------------------------------------------------|---------------------------------------------------------------|------------------------------------------------------------------------------------------------------------------------------------------------------------|-------------------------------------------------------------------------------------------------------------------------------------------|----------------------------------------------------------------------------------------------------------------------------------------------------------------------------------------------------------------------------------------------------------------------------------------------------------------------------------------------------------------------------------------------------------------------------------------------------------------------------------------------------------------------------------------------------------------------------------------------------------------------------------|
|                                                 |                                                               |                                                                                                                                                            |                                                                                                                                           | <p>Tamil Nadu: <math>-0.085</math> (<math>p&gt;0.05</math>)</p> <p><b>L) Association between PFHI enrolment and CHE</b></p> <p><b>25</b></p> <p>Andhra Pradesh: <math>-0.210</math> (<math>p&lt;0.001</math>)</p> <p>Karnataka: <math>-0.083</math> (<math>p&gt;0.05</math>)</p> <p>Tamil Nadu: <math>-0.031</math> (<math>p&gt;0.05</math>)</p> <p><b>M) Association between PFHI enrolment and CHE</b></p> <p><b>40</b></p> <p>Andhra Pradesh: <math>-0.255</math> (<math>p&lt;0.001</math>)</p> <p>Karnataka: <math>-0.118</math> (<math>p&gt;0.05</math>)</p> <p>Tamil Nadu: <math>0.090</math> (<math>p&gt;0.05</math>)</p> |
| <p><b>Johnson, &amp; Krishnaswamy, 2012</b></p> | <p>Secondary data analysis of the two rounds of NSSO data</p> | <p>NSSO round 61 (conducted in 2004-05) and round 66 (conducted in 2009-10) as pre and post surveys Excluding Andhra Pradesh, Karnataka and Tamil Nadu</p> | <p>PFHI covered: RSBY</p> <p><b>Treatment group= RSBY</b> treated districts</p> <p>*A household is deemed treated if the policy start</p> | <p><b>1) Impact of RSBY (without household matching)</b></p> <p><b>A) OP expenditure (in Rs)</b></p> <p>Triple diff= <math>-4.478</math> (<math>p&lt;0.05</math>)</p> <p>DID= <math>-4.716</math> (<math>p&lt;0.01</math>)</p> <p><b>B) IP expenditure (in Rs)</b></p> <p>Triple diff.= <math>-8.938</math> (<math>p&gt;0.1</math> i.e. <math>0.104</math>)</p> <p>DID= <math>1.106</math> (<math>P&gt;0.1</math> I.e. <math>p=0.461</math>)</p>                                                                                                                                                                                 |

1  
2  
3  
4  
5  
6  
7  
8  
9  
10  
11  
12  
13  
14  
15  
16  
17  
18  
19  
20  
21  
22  
23  
24  
25  
26  
27  
28  
29  
30  
31  
32  
33  
34  
35  
36  
37  
38  
39  
40  
41  
42  
43  
44  
45  
46  
47

|  |  |                                                                                                                                                                  |                                                                                                                                                                                                                                                                                                                                                                        |                                                                                                                                                                                                                                                                                                                                                                                                                                                                                                                                                                                                                                                                                                                                                                     |
|--|--|------------------------------------------------------------------------------------------------------------------------------------------------------------------|------------------------------------------------------------------------------------------------------------------------------------------------------------------------------------------------------------------------------------------------------------------------------------------------------------------------------------------------------------------------|---------------------------------------------------------------------------------------------------------------------------------------------------------------------------------------------------------------------------------------------------------------------------------------------------------------------------------------------------------------------------------------------------------------------------------------------------------------------------------------------------------------------------------------------------------------------------------------------------------------------------------------------------------------------------------------------------------------------------------------------------------------------|
|  |  | <p>-Difference in differences analysis</p> <p>-Triple difference analysis (non BPL households as a second control)</p> <p>-Coarsened exact matching approach</p> | <p>date in that district was two month prior to the date of the interview in order to give the household sufficient time to undergo a procedure</p> <p><b>Control 1</b>= those districts where RSBY was planned (and an insurer identified), but not launched at the time of the survey</p> <p><b>Control 2</b>= districts where RSBY was not planned at the time.</p> | <p>C) Total Medical Exp. (in Rs.)<br/>Triple diff.= -13.42 (p&lt;0.05 i.e. p= 0.046)<br/>DID= -3.610 (P&lt;0.05 I.e. p= 0.025)</p> <p>D) Was hospitalized<br/>Triple diff.= 0.0249 (p&lt;0.05 i.e. p= (0.018))<br/>DID= 0.0157 (P&gt;0.1 I.e. p= 0.473)</p> <p><b>2) For duration of treatment model (without household matching)</b></p> <p>A) OP expenditure (in Rs)<br/>Triple diff.= -0.230 (p&gt;0.1 i.e. p= 0.357)<br/>DID= -0.280 (P&lt;0.05 I.e. p= 0.033)</p> <p>B) IP expenditure (in Rs)<br/>Triple diff.= -0.811 (p&lt;0.1 i.e. 0.066)<br/>DID= - 0.00277 (P&gt;0.1 I.e. p= (0.984))</p> <p>C) Total Medical Exp. (in Rs.)<br/>Triple diff.= - 1.041 (p&lt;0.1 i.e. p= (0.075))<br/>DID= -0.282 (P&lt;0.1 I.e. p= 0.076)</p> <p>D) Was hospitalized</p> |
|--|--|------------------------------------------------------------------------------------------------------------------------------------------------------------------|------------------------------------------------------------------------------------------------------------------------------------------------------------------------------------------------------------------------------------------------------------------------------------------------------------------------------------------------------------------------|---------------------------------------------------------------------------------------------------------------------------------------------------------------------------------------------------------------------------------------------------------------------------------------------------------------------------------------------------------------------------------------------------------------------------------------------------------------------------------------------------------------------------------------------------------------------------------------------------------------------------------------------------------------------------------------------------------------------------------------------------------------------|

1  
2  
3  
4  
5  
6  
7  
8  
9  
10  
11  
12  
13  
14  
15  
16  
17  
18  
19  
20  
21  
22  
23  
24  
25  
26  
27  
28  
29  
30  
31  
32  
33  
34  
35  
36  
37  
38  
39  
40  
41  
42  
43  
44  
45  
46  
47

|  |  |  |                                                                                                                                                                             |                                                                                                                                                                                                                                                                                                                                                                                                                                                                                                                                                                                                                                                                                                                                                                                                                                                                                                                                                                                          |
|--|--|--|-----------------------------------------------------------------------------------------------------------------------------------------------------------------------------|------------------------------------------------------------------------------------------------------------------------------------------------------------------------------------------------------------------------------------------------------------------------------------------------------------------------------------------------------------------------------------------------------------------------------------------------------------------------------------------------------------------------------------------------------------------------------------------------------------------------------------------------------------------------------------------------------------------------------------------------------------------------------------------------------------------------------------------------------------------------------------------------------------------------------------------------------------------------------------------|
|  |  |  | <p>297 control and 204 treatment districts with a total of 186,065 households. Out of these, 102,810 are from the PRE intervention round and 83,255 from the POST round</p> | <p>Triple diff.= 0.00299 (p&lt;0.01 i.e. p= 0.006)<br/>                 DID= 0.000672 (P&gt;0.1 I.e. p= 0.720)<br/> <b>3) Impact of RSBY (for matched districts and households)</b><br/>                 A) OP expenditure (in Rs)<br/>                 Triple diff.= -3.767 (p&lt;0.1 i.e. p= 0.071)<br/>                 DID= - 4.934 (P&lt;0.01 I.e. p= 0.001)<br/>                 B) IP expenditure (in Rs)<br/>                 Triple diff.= -7.683 (p&gt;0.1 i.e. 0.143)<br/>                 DID= 1.183 (P&gt;0.1 I.e. p= 0.413)<br/>                 C) Total Medical Exp. (in Rs.)<br/>                 Triple diff.= -11.45 (p&lt;0.1 i.e. p= 0.053)<br/>                 DID= -3.751 (P&lt;0.05 I.e. p= 0.015)<br/>                 D) Was hospitalized<br/>                 Triple diff.= 0.0259 (p&lt;0.05 i.e. p= 0.019)<br/>                 DID= 0.0171 (P&gt;0.1 I.e. p= 0.437)<br/> <b>4) For duration of treatment model (matched districts and households)</b></p> |
|--|--|--|-----------------------------------------------------------------------------------------------------------------------------------------------------------------------------|------------------------------------------------------------------------------------------------------------------------------------------------------------------------------------------------------------------------------------------------------------------------------------------------------------------------------------------------------------------------------------------------------------------------------------------------------------------------------------------------------------------------------------------------------------------------------------------------------------------------------------------------------------------------------------------------------------------------------------------------------------------------------------------------------------------------------------------------------------------------------------------------------------------------------------------------------------------------------------------|



1  
2  
3  
4  
5  
6  
7  
8  
9  
10  
11  
12  
13  
14  
15  
16  
17  
18  
19  
20  
21  
22  
23  
24  
25  
26  
27  
28  
29  
30  
31  
32  
33  
34  
35  
36  
37  
38  
39  
40  
41  
42  
43  
44  
45  
46  
47

|  |  |  |  |                                                                                                                                                                                                                                                                                                                                                                                                                                                                                                                                                                                                                                                                                                                                                                                                                                                                          |
|--|--|--|--|--------------------------------------------------------------------------------------------------------------------------------------------------------------------------------------------------------------------------------------------------------------------------------------------------------------------------------------------------------------------------------------------------------------------------------------------------------------------------------------------------------------------------------------------------------------------------------------------------------------------------------------------------------------------------------------------------------------------------------------------------------------------------------------------------------------------------------------------------------------------------|
|  |  |  |  | <p><b>A) OP expenditure (in Rs)</b></p> <p>Triple diff.= -0.136 (p&gt;0.05 i.e. p= (0.511))</p> <p>DID= - 0.312 (P&lt;0.05 I.e. p= 0.025)</p> <p><b>B) IP expenditure (in Rs)</b></p> <p>Triple diff.= -0.677 (p&gt;0.1 i.e. p= 0.117)</p> <p>DID= - 0.00457 (P&gt;0.1 I.e. p= 0.972)</p> <p><b>C) Total Medical Exp. (in Rs.)</b></p> <p>Triple diff.= -0.813 (p&gt;0.1 i.e. p= 0.109)</p> <p>DID= - 0.316 (P&lt;0.05 I.e. p= 0.041)</p> <p><b>D) Was hospitalized</b></p> <p>Triple diff.= 0.00311 (p&lt;0.01 i.e. p= 0.005)</p> <p>DID= 0.000715 (P&gt;0.1 I.e. p= 0.706)</p> <p><b>5) Impact of RSBY (matched districts and households) – No Uttar Pradesh and Haryana</b></p> <p><b>A) OP expenditure (in Rs)</b></p> <p>Triple diff.= -3.650 (p&gt;0.05 i.e. p= (0.511))</p> <p>DID= - 2.878 (P&lt;0.01 I.e. p= 0.010)</p> <p><b>B) IP expenditure (in Rs)</b></p> |
|--|--|--|--|--------------------------------------------------------------------------------------------------------------------------------------------------------------------------------------------------------------------------------------------------------------------------------------------------------------------------------------------------------------------------------------------------------------------------------------------------------------------------------------------------------------------------------------------------------------------------------------------------------------------------------------------------------------------------------------------------------------------------------------------------------------------------------------------------------------------------------------------------------------------------|

For peer review only

|    |  |  |  |                                                        |
|----|--|--|--|--------------------------------------------------------|
| 1  |  |  |  | Triple diff.= -10.52 (p>0.1 i.e. p= 0.153)             |
| 2  |  |  |  |                                                        |
| 3  |  |  |  | DID= 1.734 (p>0.1 I.e. p= 0.346)                       |
| 4  |  |  |  | C) Total Medical Exp. (in Rs.)                         |
| 5  |  |  |  | Triple diff.= -14.17 (p>0.1 i.e. p= 0.096)             |
| 6  |  |  |  | DID= -1.144 (P>0.1 I.e. p= 0.403)                      |
| 7  |  |  |  | D) Was hospitalized                                    |
| 8  |  |  |  | Triple diff.= 0.0269 (p<0.05 i.e. p= 0.042)            |
| 9  |  |  |  | DID= 0.0543 (P<0.1 I.e. p= 0.005)                      |
| 10 |  |  |  | <b>6) For duration of treatment model (Matched</b>     |
| 11 |  |  |  | <b>districts and households) (No Uttar Pradesh and</b> |
| 12 |  |  |  | <b>Haryana)</b>                                        |
| 13 |  |  |  | A) OP expenditure (in Rs)                              |
| 14 |  |  |  | Triple diff.= -0.186 (p>0.1 i.e. p= 0.496)             |
| 15 |  |  |  | DID= -0.122 (P>0.1 I.e. p= 0.314)                      |
| 16 |  |  |  | B) IP expenditure (in Rs)                              |
| 17 |  |  |  | Triple diff.= -0.679 (p>0.1 i.e. p= 0.292)             |
| 18 |  |  |  | DID= 0.0322 (p>0.1 I.e. p= 0.834)                      |
| 19 |  |  |  | C) Total Medical Exp. (in Rs.)                         |
| 20 |  |  |  |                                                        |
| 21 |  |  |  |                                                        |
| 22 |  |  |  |                                                        |
| 23 |  |  |  |                                                        |
| 24 |  |  |  |                                                        |
| 25 |  |  |  |                                                        |
| 26 |  |  |  |                                                        |
| 27 |  |  |  |                                                        |
| 28 |  |  |  |                                                        |
| 29 |  |  |  |                                                        |
| 30 |  |  |  |                                                        |
| 31 |  |  |  |                                                        |
| 32 |  |  |  |                                                        |
| 33 |  |  |  |                                                        |
| 34 |  |  |  |                                                        |
| 35 |  |  |  |                                                        |
| 36 |  |  |  |                                                        |
| 37 |  |  |  |                                                        |
| 38 |  |  |  |                                                        |
| 39 |  |  |  |                                                        |
| 40 |  |  |  |                                                        |
| 41 |  |  |  |                                                        |
| 42 |  |  |  |                                                        |
| 43 |  |  |  |                                                        |
| 44 |  |  |  |                                                        |
| 45 |  |  |  |                                                        |
| 46 |  |  |  |                                                        |
| 47 |  |  |  |                                                        |

|                                       |                                                                                                                                                                                                                                         |                                                                                                                                                                                                                                                    |                                                                                                                                                                                                                                             |                                                                                                                                                                                                                                                                                                                                                                                                                                                                                                                                       |
|---------------------------------------|-----------------------------------------------------------------------------------------------------------------------------------------------------------------------------------------------------------------------------------------|----------------------------------------------------------------------------------------------------------------------------------------------------------------------------------------------------------------------------------------------------|---------------------------------------------------------------------------------------------------------------------------------------------------------------------------------------------------------------------------------------------|---------------------------------------------------------------------------------------------------------------------------------------------------------------------------------------------------------------------------------------------------------------------------------------------------------------------------------------------------------------------------------------------------------------------------------------------------------------------------------------------------------------------------------------|
|                                       |                                                                                                                                                                                                                                         |                                                                                                                                                                                                                                                    |                                                                                                                                                                                                                                             | <p>Triple diff.= -0.865 (p&gt;0.1 i.e. p= 0.241)</p> <p>DID= -0.0895 (P&gt;0.1 I.e. p= 0.560)</p> <p>D) Was hospitalized</p> <p>Triple diff.= 0.00419 (p&lt;0.01 i.e. p= 0.000)</p> <p>DID= 0.00349 (P&lt;0.1 I.e. p= 0.076)</p> <p>Note: OP exp, IP Exp and Total exp. are per capita per month</p>                                                                                                                                                                                                                                  |
| <p><b>Karan, Yip, Mahal, 2017</b></p> | <p>-Three repeated cross section HH Surveys</p> <p>-Difference-in-differences (DID) methods were used to evaluate the causal impacts of RSBY</p> <p>-'intention to treat' (ITT) effect</p> <p>-propensity-score matching, to create</p> | <p>Three waves of HH 'Consumer Expenditure Surveys' (CES): 1999-2000 (pre-intervention= T1), 2004-5 (T2) &amp; 2011-2 (post-intervention= T3), conducted by the NSSO.</p> <p>Sample size in three rounds ranged from: 100,000 and 125,000 HHs.</p> | <p>PFHI covered: RSBY implementation began in 2008-09.</p> <p><b>Treatment group:</b> Poor HHs in RSBY implementing districts.</p> <p><b>Control:</b> Poor in non-RSBY districts.</p> <p>Poor: belonging to the two poorest expenditure</p> | <p><b>Districts which began participating in RSBY on or before March 2010 (treat 1)</b></p> <p><b>1) IP OOP:</b></p> <p>Pre-intervention DID coefficient estimates are not statistically significant for all outcomes of interest.</p> <p>A) RSBY increased statistically insignificant likelihood of incurring any inpatient OOP in the treatment group 'treat1' by 22% relative to Controls (OR: 1.223, SE: 0.2777).</p> <p>B) Conditional on having positive IP OOP, the HH OOP spending per person remained unchanged for the</p> |

|  |                                                                                                                          |  |                                          |                                                                                                                                                                                                                                                                                                                                                                                                                                                                                                                                                                                                                                                                                                                                                                                                                                          |
|--|--------------------------------------------------------------------------------------------------------------------------|--|------------------------------------------|------------------------------------------------------------------------------------------------------------------------------------------------------------------------------------------------------------------------------------------------------------------------------------------------------------------------------------------------------------------------------------------------------------------------------------------------------------------------------------------------------------------------------------------------------------------------------------------------------------------------------------------------------------------------------------------------------------------------------------------------------------------------------------------------------------------------------------------|
|  | <p>comparable treatment and control districts using pooled data from the two pre-intervention years (2000 and 2005).</p> |  | <p>quintiles as a proxy for BPL HHs.</p> | <p>treatment compared to controls (Difference in pre-post: 0.005, SE: 0.212).</p> <p>C) No effect of the scheme on the share of IP OOP spending in total HH expenditures for the ‘treat1’ group (DID coefficients: -0.007, SE: 0.0079).</p> <p>D) RSBY lowers the likelihood of experiencing catastrophic IP OOP spending by 26%, the effect is not statistically significant (OR: 0.743, SE: 0.2272).</p> <p><b>2) OP OOP:</b></p> <p>A) RSBY increased the likelihood of incurring OP OOP in treatment HHs by 23% (OR: 1.226, SE: 0.1806);</p> <p>B) Per person OP OOP (conditional on reporting any OP OOP) declined by 5% in 2012 and these impacts were statistically significant (Difference: -0.049, SE: 0.0580).</p> <p>C) RSBY did not affect the share of OP OOP in total spending (DID coefficient: - 0.004, SE: 0.0028).</p> |
|--|--------------------------------------------------------------------------------------------------------------------------|--|------------------------------------------|------------------------------------------------------------------------------------------------------------------------------------------------------------------------------------------------------------------------------------------------------------------------------------------------------------------------------------------------------------------------------------------------------------------------------------------------------------------------------------------------------------------------------------------------------------------------------------------------------------------------------------------------------------------------------------------------------------------------------------------------------------------------------------------------------------------------------------------|

1  
2  
3  
4  
5  
6  
7  
8  
9  
10  
11  
12  
13  
14  
15  
16  
17  
18  
19  
20  
21  
22  
23  
24  
25  
26  
27  
28  
29  
30  
31  
32  
33  
34  
35  
36  
37  
38  
39  
40  
41  
42  
43  
44  
45  
46  
47

|  |  |  |  |                                                                                                                                                                                                                                                                                                                                                                                                                                                                                                                                                                                                                                                                                                                                                                                                                                                                                                    |
|--|--|--|--|----------------------------------------------------------------------------------------------------------------------------------------------------------------------------------------------------------------------------------------------------------------------------------------------------------------------------------------------------------------------------------------------------------------------------------------------------------------------------------------------------------------------------------------------------------------------------------------------------------------------------------------------------------------------------------------------------------------------------------------------------------------------------------------------------------------------------------------------------------------------------------------------------|
|  |  |  |  | <p>D) The probability of catastrophic OP OOP among treat1 HHs was lower by 11% (OR: 0.891, SE: 0.1425) but remained statistically insignificant.</p> <p><b>3) Total OOP:</b></p> <p>Total OOP spending showed mostly statistically insignificant differences in the changes in all the four OOP indicators between treatment and control groups, excepting 30% (OR: 1.298, SE: 0.2013) increase in probability of any OOP payments in treat1</p> <p><b>4) Nonmedical expenditure of households:</b> RSBY increased nonmedical expenditure of HHs in the treat1 group by 5%</p> <p><b>5) Drug and non-drug expenditure:</b> RSBY did not affect the likelihood of incurring both drug and non-drug IP OOP. However, conditional on positive non-drug OOP, the level of OOP was 27% higher among treat1 households after RSBY was introduced, and this difference was statistically significant.</p> |
|--|--|--|--|----------------------------------------------------------------------------------------------------------------------------------------------------------------------------------------------------------------------------------------------------------------------------------------------------------------------------------------------------------------------------------------------------------------------------------------------------------------------------------------------------------------------------------------------------------------------------------------------------------------------------------------------------------------------------------------------------------------------------------------------------------------------------------------------------------------------------------------------------------------------------------------------------|

For peer review only

|    |  |  |  |                                                           |
|----|--|--|--|-----------------------------------------------------------|
| 1  |  |  |  |                                                           |
| 2  |  |  |  |                                                           |
| 3  |  |  |  |                                                           |
| 4  |  |  |  | <b>Districts which began participating between April</b>  |
| 5  |  |  |  | <b>2010 and March 2012 (treat 2)</b>                      |
| 6  |  |  |  |                                                           |
| 7  |  |  |  | <b>1) IP OOP:</b>                                         |
| 8  |  |  |  |                                                           |
| 9  |  |  |  | A) RSBY increased the probability of incurring any IP     |
| 10 |  |  |  | OOP by 28% (OR: 1.281, SE: 0.3201) and                    |
| 11 |  |  |  |                                                           |
| 12 |  |  |  | B) lowered per member OOP IP expenditure                  |
| 13 |  |  |  | (conditional on reporting any IP OOP) by 16%              |
| 14 |  |  |  |                                                           |
| 15 |  |  |  | (Difference: - 0.164, SE: 0.2175), but were statistically |
| 16 |  |  |  | insignificant.                                            |
| 17 |  |  |  |                                                           |
| 18 |  |  |  | C) No impact of RSBY on IP OOP as a share of total        |
| 19 |  |  |  | HH spending in ‘treat2’ HHs (DID coefficient: -0.008,     |
| 20 |  |  |  | SE: 0.0081).                                              |
| 21 |  |  |  |                                                           |
| 22 |  |  |  | D) RSBY lowered the probability of incurring any          |
| 23 |  |  |  | catastrophic inpatient OOP by almost 9% (OR: 0.911,       |
| 24 |  |  |  | SE: 0.3162) in ‘treat2’ HHs, but this was statistically   |
| 25 |  |  |  | insignificant.                                            |
| 26 |  |  |  |                                                           |
| 27 |  |  |  | <b>2) OP OOP:</b>                                         |
| 28 |  |  |  |                                                           |
| 29 |  |  |  |                                                           |
| 30 |  |  |  |                                                           |
| 31 |  |  |  |                                                           |
| 32 |  |  |  |                                                           |
| 33 |  |  |  |                                                           |
| 34 |  |  |  |                                                           |
| 35 |  |  |  |                                                           |
| 36 |  |  |  |                                                           |
| 37 |  |  |  |                                                           |
| 38 |  |  |  |                                                           |
| 39 |  |  |  |                                                           |
| 40 |  |  |  |                                                           |
| 41 |  |  |  |                                                           |
| 42 |  |  |  |                                                           |
| 43 |  |  |  |                                                           |
| 44 |  |  |  |                                                           |
| 45 |  |  |  |                                                           |
| 46 |  |  |  |                                                           |
| 47 |  |  |  |                                                           |

1  
2  
3  
4  
5  
6  
7  
8  
9  
10  
11  
12  
13  
14  
15  
16  
17  
18  
19  
20  
21  
22  
23  
24  
25  
26  
27  
28  
29  
30  
31  
32  
33  
34  
35  
36  
37  
38  
39  
40  
41  
42  
43  
44  
45  
46  
47

|  |  |  |  |                                                                                                                                                                                                                                                                                                                                                                                                                                                                                                                                                                                                                                                                                                                                                                                                                             |
|--|--|--|--|-----------------------------------------------------------------------------------------------------------------------------------------------------------------------------------------------------------------------------------------------------------------------------------------------------------------------------------------------------------------------------------------------------------------------------------------------------------------------------------------------------------------------------------------------------------------------------------------------------------------------------------------------------------------------------------------------------------------------------------------------------------------------------------------------------------------------------|
|  |  |  |  | <p>No statistically significant effect of the scheme in the treat2 households (Probability of any OOP OR: 1.093, SE: 0.1737; OOP Share DID -0.004, SE: 0.0033; Probability of Catastrophic OR 1.003, SE 0.1972), except for per person monthly OP OOP spending, which declined by 19% (Difference: -0.151, SE: 0.0735).</p> <p><b>3) Total OOP:</b><br/>Insignificant result in all OOP indicators except 11% (OR: -0.113, SE: 0.0738) decline in OOP level</p> <p><b>4) Nonmedical expenditure of households:</b> No difference.</p> <p><b>5) Drug and non-drug expenditure:</b> mostly small and Insignificant</p> <p><b>Subgroup analysis using only data for treated districts with “high enrolment rates,” defined as enrolment exceeding 50% of eligible families:</b> Did not find evidence of larger effects in</p> |
|--|--|--|--|-----------------------------------------------------------------------------------------------------------------------------------------------------------------------------------------------------------------------------------------------------------------------------------------------------------------------------------------------------------------------------------------------------------------------------------------------------------------------------------------------------------------------------------------------------------------------------------------------------------------------------------------------------------------------------------------------------------------------------------------------------------------------------------------------------------------------------|

|                            |                                                                                                                   |                                                                                                         |                                                                                                                                                                                 |                                                                                                                                                                                                                                                                                                                                                                                                                                                                                                                                                           |
|----------------------------|-------------------------------------------------------------------------------------------------------------------|---------------------------------------------------------------------------------------------------------|---------------------------------------------------------------------------------------------------------------------------------------------------------------------------------|-----------------------------------------------------------------------------------------------------------------------------------------------------------------------------------------------------------------------------------------------------------------------------------------------------------------------------------------------------------------------------------------------------------------------------------------------------------------------------------------------------------------------------------------------------------|
|                            |                                                                                                                   |                                                                                                         |                                                                                                                                                                                 | high-enrolment districts. The direction of change of all the outcome indicators remained largely similar to the findings for the broader set of intervention districts                                                                                                                                                                                                                                                                                                                                                                                    |
| <b>Katyal et al., 2015</b> | A retrospective, longitudinal, controlled quasi-experimental Study (Two large surveys): Difference-in-differences | Pre-post intervention effect: Pre-intervention NSSO 2004 survey and post intervention NSSO 2012 survey. | PFHI covered: RAS and RSBY<br>No. Of HHs:<br><b>Intervention 1:</b> RAS of AP in 2004: 0559 and 2012: 8623.<br><b>Intervention 2:</b> RSBY of MH in 2004: 5314 & in 2012: 10073 | 1) <b>Changes in average IP expenditure—public vs private</b> (the real terms change (deflated to 2004 prices) in these outcomes at follow-up and the DID estimate comparing AP with MH)<br><b>Private:</b> The overall expenditure on IP care per episode in private facilities has increased in both states and the DID is -2076.5 (-3996:-157) p=0.04 INR in AP compared to MH.<br><b>Public:</b> The average expenditure on public facilities has also increased in both states, and DID is -1605.3 (-2628.6:-582.1) p=0.002 INR in AP compared to MH |
| <b>Khetrपाल &amp;</b>      | Cross sectional survey (bivariate analysis and Student's t test)                                                  | Districts of Patiala, Punjab & Yamunanagar, Haryana in 2011-13. Participants                            | PFHI covered: RSBY<br>RSBY had completed at least two years of                                                                                                                  | RSBY beneficiaries had incurred OOP expenditure of mean: ₹5748 (±9211) though it was lesser than for                                                                                                                                                                                                                                                                                                                                                                                                                                                      |



|                                                  |                                                                                                                                              |                                                                                                                                                                                                                      |                                                                                                                                                                                                                            |                                                                                                                                                                                                                                                                                                                                                                                                                                                                                  |
|--------------------------------------------------|----------------------------------------------------------------------------------------------------------------------------------------------|----------------------------------------------------------------------------------------------------------------------------------------------------------------------------------------------------------------------|----------------------------------------------------------------------------------------------------------------------------------------------------------------------------------------------------------------------------|----------------------------------------------------------------------------------------------------------------------------------------------------------------------------------------------------------------------------------------------------------------------------------------------------------------------------------------------------------------------------------------------------------------------------------------------------------------------------------|
| <p><b>Acharya, 2019</b></p>                      |                                                                                                                                              | <p>chosen from 12 empaneled hospitals (3 public and 3 private each from both the districts)</p>                                                                                                                      | <p>implementation in these districts at the time of data collection.<br/>Participants who were enrolled in RSBY (n=751) and non RSBY (n=364)</p>                                                                           | <p>non-RSBY (mean: ₹10667 ±16990.9) and less at public facilities when compared to private</p>                                                                                                                                                                                                                                                                                                                                                                                   |
| <p><b>Mahapatro, Singh &amp; Singh, 2018</b></p> | <p>Analysis of the 71<sup>st</sup> round of cross- sectional household NSS 2014 survey<br/>Bi variate and multivariate analysis was done</p> | <p>-71 st round National Sample Survey, 2014, ‘Social Consumption: Health’ Schedule 25.0<br/>-To examine the impact of health insurance on OOP payment, two-part model was used (part 1 logit and part 2 linear)</p> | <p>PFHI covered: Government funded health insurance schemes like RSBY, Arogyashree, CGHS, ESIS<br/>Information of hospitalization during 365 days was used for the analysis.<br/>For association comparisons were made</p> | <p><b>1) Average OOP Expenditure per hospitalization</b><br/>For government funded health insurance (RSBY, Arogyasri, CGHS, ESIS): Public provider Mean= Rs 3987 (47%); Private provider Mean= Rs 19737 (53%); Total Mean= 12408 (100%)<br/>For other HI: Public provider Mean= 7934 (18%); private provider Mean= 20764 (72%); Total Mean= 18510 (100 %)<br/>Not Health insured: Public provider Mean= 5437 (46%); Private provider Mean= 24341 (54%); Total= 15647 (100 %)</p> |

1  
2  
3  
4  
5  
6  
7  
8  
9  
10  
11  
12  
13  
14  
15  
16  
17  
18  
19  
20  
21  
22  
23  
24  
25  
26  
27  
28  
29  
30  
31  
32  
33  
34  
35  
36  
37  
38  
39  
40  
41  
42  
43  
44  
45  
46  
47

|                                                  |                                                         |                                                                                                                                            |                                                                                                             |                                                                                                                                                                                                                                                                                                                                                                                                                                                                                                                                       |
|--------------------------------------------------|---------------------------------------------------------|--------------------------------------------------------------------------------------------------------------------------------------------|-------------------------------------------------------------------------------------------------------------|---------------------------------------------------------------------------------------------------------------------------------------------------------------------------------------------------------------------------------------------------------------------------------------------------------------------------------------------------------------------------------------------------------------------------------------------------------------------------------------------------------------------------------------|
|                                                  |                                                         |                                                                                                                                            | <p>between insured and uninsured</p>                                                                        | <p><b>2) Extent of OOP expenditure (Monthly) by insurance status</b></p> <p>For Government health insurance=Rs 1034</p> <p>For Private (other) HI= Rs 1542</p> <p>For non-insured= Rs 1304</p> <p>Therefore, OOP expenditure was lower for government insurance holder than those not having any of government Insurance schemes</p> <p><b>3) Association of OOPE with health insurance</b></p> <p>For PFHI insurance= - 2.47 (p&lt;0.01) (part 1 Logit model)</p> <p>For PFHI insurance= -0.34 (p&lt;0.01) (part 2 Linear model)</p> |
| <p><b>Nandi, Schneider &amp; Dixit, 2017</b></p> | <p>Secondary data, multivariate logistic regression</p> | <p>NSSO, the Chhattisgarh State data used in this study were extracted from the 25th schedule of the 71st round of the cross-sectional</p> | <p>PFHI covered: Government funded health insurance schemes in Chhattisgarh viz. RSBY, MSBY, ESIS, CGHS</p> | <p><b>Out of pocket expenditure:</b></p> <p>-Government insurance coverage (AOR 0.265; 95% CI: 0.174–0.405) and childbirth conditions (AOR 0.516; 95% CI: 0.290–0.918) were significantly less</p>                                                                                                                                                                                                                                                                                                                                    |

1  
2  
3  
4  
5  
6  
7  
8  
9  
10  
11  
12  
13  
14  
15  
16  
17  
18  
19  
20  
21  
22  
23  
24  
25  
26  
27  
28  
29  
30  
31  
32  
33  
34  
35  
36  
37  
38  
39  
40  
41  
42  
43  
44  
45  
46  
47

|                    |                                                             |                                                                                                                                                                                                                                                                                                                                                                  |                              |                                                                                                                                                                                                                                                                                                                                     |
|--------------------|-------------------------------------------------------------|------------------------------------------------------------------------------------------------------------------------------------------------------------------------------------------------------------------------------------------------------------------------------------------------------------------------------------------------------------------|------------------------------|-------------------------------------------------------------------------------------------------------------------------------------------------------------------------------------------------------------------------------------------------------------------------------------------------------------------------------------|
|                    |                                                             | <p>Indian National Sample Survey, conducted between January and June 2014</p> <p>The Chhattisgarh sample included 1205 house- holds and 6026 individuals (household members)</p> <p>Out of pocket expenditure on hospitalization was calculated per episode as medical expenditure minus reimbursements. Weighted medians of OOP expenditure were calculated</p> |                              | <p>likely to entail OOP expenditure than no insurance and other ailments respectively</p> <p>-Women (AOR 1.700; 95% CI: 1.012–2.858) more likely to incur OOP expenditure than men and hospitalization in private hospital had a significantly higher possibility of incurring OOP expenditure than any other type of facility.</p> |
| <b>Philip, Kan</b> | A comparative cross-sectional survey of 149 insured and 147 | Using generalized estimating equations, the correlates of inpatient                                                                                                                                                                                                                                                                                              | PFHI covered: CHIS of Kerala | OOPE: The mean OOP expenses for inpatient services among insured participants (INR 448.95) was                                                                                                                                                                                                                                      |

|                                                                                                                                                                                                                                                     |                                                                                                                                                                                                                                 |                                                                                                                                                                                                                                                                                                                                                                  |                                                                                                                                |                                                                                                                  |
|-----------------------------------------------------------------------------------------------------------------------------------------------------------------------------------------------------------------------------------------------------|---------------------------------------------------------------------------------------------------------------------------------------------------------------------------------------------------------------------------------|------------------------------------------------------------------------------------------------------------------------------------------------------------------------------------------------------------------------------------------------------------------------------------------------------------------------------------------------------------------|--------------------------------------------------------------------------------------------------------------------------------|------------------------------------------------------------------------------------------------------------------|
| <p>1<br/>2<br/>3<br/>4<br/>5<br/>6<br/>7<br/>8<br/>9<br/>10<br/>11<br/>12<br/>13<br/>14<br/>15<br/>16<br/>17<br/>18<br/>19<br/>20<br/>21<br/>22<br/>23<br/>24<br/>25<br/>26<br/>27<br/>28<br/>29<br/>30<br/>31<br/>32</p> <p><b>Sarma, 2016</b></p> | <p>uninsured BPL households was conducted in Trivandrum district of Kerala. Pearson's <math>\chi^2</math> test comparison. Multivariate logistic regression analysis was used to derive the predictors of insurance status.</p> | <p>service utilization of individuals were estimated. The models were built by the method of iterative backward elimination and forward selection because the study did not use any conceptual framework, and it aimed at exploration. The Mann-Whitney <i>U</i> test was used to compare the expenditure associated with inpatient care between the 2 group</p> | <p>A total of 149 insured and 147 uninsured households, with 667 and 578 members, respectively, were included in the study</p> | <p>significantly higher than that of the uninsured households (INR 159.93); <math>p = .003</math> at 95% CI.</p> |
| <p>33<br/>34<br/>35<br/>36<br/>37<br/>38<br/>39<br/>40<br/>41<br/>42<br/>43<br/>44<br/>45<br/>46<br/>47</p> <p><b>Ranjan et al 2018</b></p>                                                                                                         | <p>Analysis of a cross-sectional study</p>                                                                                                                                                                                      | <p>-Data from the 71<sup>st</sup> round of NSSO survey I.e. 'Social Consumption: Health' survey</p>                                                                                                                                                                                                                                                              | <p>PFHI covered: Public Funded Health Insurance (PFHI) schemes e.g. RSBY</p>                                                   | <p><b>1) Average OOPE (the median) with PFHI coverage and no insurance</b><br/>A) Rural</p>                      |

1  
2  
3  
4  
5  
6  
7  
8  
9  
10  
11  
12  
13  
14  
15  
16  
17  
18  
19  
20  
21  
22  
23  
24  
25  
26  
27  
28  
29  
30  
31  
32  
33  
34  
35  
36  
37  
38  
39  
40  
41  
42  
43  
44  
45  
46  
47

|  |  |                                                                                                                         |  |                                                                                                                                                                                                                                                                                                                                                                                                                                                                                                                                                                                                                                                                    |
|--|--|-------------------------------------------------------------------------------------------------------------------------|--|--------------------------------------------------------------------------------------------------------------------------------------------------------------------------------------------------------------------------------------------------------------------------------------------------------------------------------------------------------------------------------------------------------------------------------------------------------------------------------------------------------------------------------------------------------------------------------------------------------------------------------------------------------------------|
|  |  | <p>-Propensity score matching (PSM) for the effectiveness of PFHIs and multiple logistic regression for association</p> |  | <p>People having government insurance: Average OOPE in public= Rs 2848; Average OOPE in private= Rs. 17,493</p> <p>People with no insurance: Average OOPE in public =Rs 3994; Average OOPE in private= Rs 20,445</p> <p>B) Urban</p> <p>People having government insurance: Average OOPE in public= Rs 2738; Average OOPE in private= Rs. 19,111</p> <p>People with no insurance: Average OOPE in public =Rs 6322; Average OOPE in private= Rs 27,102</p> <p><b>2) Impact Assessment of PFHI on CHE at 10% and 25% threshold using Propensity Score Matching (PSM)</b></p> <p>For 10%CHE</p> <p>Public insurance v/s no insurance (unmatched)= -0.05 (SE=0.01)</p> |
|--|--|-------------------------------------------------------------------------------------------------------------------------|--|--------------------------------------------------------------------------------------------------------------------------------------------------------------------------------------------------------------------------------------------------------------------------------------------------------------------------------------------------------------------------------------------------------------------------------------------------------------------------------------------------------------------------------------------------------------------------------------------------------------------------------------------------------------------|

|    |  |  |  |                                                       |
|----|--|--|--|-------------------------------------------------------|
| 1  |  |  |  | Public insurance v/s no insurance (ATT)= -0.13        |
| 2  |  |  |  | (SE=0.02; 95%CI= -0.16, -0.10)                        |
| 3  |  |  |  | For 25%CHE                                            |
| 4  |  |  |  | Public insurance v/s no insurance (unmatched)= -0.02  |
| 5  |  |  |  | (SE=0.01)                                             |
| 6  |  |  |  | Public insurance v/s no insurance (ATT)= -0.06 (SE=   |
| 7  |  |  |  | 0.01; 95%CI= -0.09, - 0.04)                           |
| 8  |  |  |  | <b>3) Impact Assessment of PFHI on CHE at 10% and</b> |
| 9  |  |  |  | <b>25% threshold using Propensity Score Matching</b>  |
| 10 |  |  |  | <b>(PSM) for below three quintiles</b>                |
| 11 |  |  |  | For 10%CHE                                            |
| 12 |  |  |  | Public v/s no insurance (unmatched)= -0.02 (SE=       |
| 13 |  |  |  | 0.009)                                                |
| 14 |  |  |  | Public insurance v/s no insurance (ATT)= -0.004       |
| 15 |  |  |  | (SE=0.03; 95%CI=-0.04 to - 0.001)                     |
| 16 |  |  |  | For 25%CHE                                            |
| 17 |  |  |  | Public v/s no insurance (unmatched)= -0.008(SE=       |
| 18 |  |  |  | 0.007)                                                |
| 19 |  |  |  |                                                       |
| 20 |  |  |  |                                                       |
| 21 |  |  |  |                                                       |
| 22 |  |  |  |                                                       |
| 23 |  |  |  |                                                       |
| 24 |  |  |  |                                                       |
| 25 |  |  |  |                                                       |
| 26 |  |  |  |                                                       |
| 27 |  |  |  |                                                       |
| 28 |  |  |  |                                                       |
| 29 |  |  |  |                                                       |
| 30 |  |  |  |                                                       |
| 31 |  |  |  |                                                       |
| 32 |  |  |  |                                                       |
| 33 |  |  |  |                                                       |
| 34 |  |  |  |                                                       |
| 35 |  |  |  |                                                       |
| 36 |  |  |  |                                                       |
| 37 |  |  |  |                                                       |
| 38 |  |  |  |                                                       |
| 39 |  |  |  |                                                       |
| 40 |  |  |  |                                                       |
| 41 |  |  |  |                                                       |
| 42 |  |  |  |                                                       |
| 43 |  |  |  |                                                       |
| 44 |  |  |  |                                                       |
| 45 |  |  |  |                                                       |
| 46 |  |  |  |                                                       |
| 47 |  |  |  |                                                       |

1  
2  
3  
4  
5  
6  
7  
8  
9  
10  
11  
12  
13  
14  
15  
16  
17  
18  
19  
20  
21  
22  
23  
24  
25  
26  
27  
28  
29  
30  
31  
32  
33  
34  
35  
36  
37  
38  
39  
40  
41  
42  
43  
44  
45  
46  
47

|  |  |  |  |                                                                                                                                                                                                                                                                                                                                                                                                                                                                                                                                                                                                                                                  |
|--|--|--|--|--------------------------------------------------------------------------------------------------------------------------------------------------------------------------------------------------------------------------------------------------------------------------------------------------------------------------------------------------------------------------------------------------------------------------------------------------------------------------------------------------------------------------------------------------------------------------------------------------------------------------------------------------|
|  |  |  |  | <p>Public insurance vs no insurance (ATT)= -0.01(SE= 0.027; 95%CI= -0.022 to 0.005)</p> <p><b>4) Impoverishment effect of OOPE on hospitalization</b></p> <p>For Government funded HI schemes</p> <p>a) Percentage of household below poverty line pre-payment= 21.85</p> <p>B) Percentage of household below poverty line post-payment= 33.51</p> <p>For Employer supported scheme</p> <p>A) Percentage of household below poverty line pre-payment= 11.04</p> <p>B) Percentage of household below poverty line post-payment= 17.33</p> <p>For Arranged by household</p> <p>A) Percentage of household below poverty line pre-payment= 3.53</p> |
|--|--|--|--|--------------------------------------------------------------------------------------------------------------------------------------------------------------------------------------------------------------------------------------------------------------------------------------------------------------------------------------------------------------------------------------------------------------------------------------------------------------------------------------------------------------------------------------------------------------------------------------------------------------------------------------------------|

For peer review only

|    |  |  |  |                                                     |
|----|--|--|--|-----------------------------------------------------|
| 1  |  |  |  |                                                     |
| 2  |  |  |  |                                                     |
| 3  |  |  |  |                                                     |
| 4  |  |  |  | B) Percentage of household below poverty line post- |
| 5  |  |  |  | payment= 10.33                                      |
| 6  |  |  |  |                                                     |
| 7  |  |  |  | Not covered                                         |
| 8  |  |  |  |                                                     |
| 9  |  |  |  | A) Percentage of household below poverty line pre-  |
| 10 |  |  |  | payment= 28.83                                      |
| 11 |  |  |  |                                                     |
| 12 |  |  |  | B) Percentage of household below poverty line post- |
| 13 |  |  |  | payment= 42.01                                      |
| 14 |  |  |  |                                                     |
| 15 |  |  |  | <b>5) Financial protection and PFHI</b>             |
| 16 |  |  |  |                                                     |
| 17 |  |  |  | A) Private provider without any insurance           |
| 18 |  |  |  |                                                     |
| 19 |  |  |  | Mean OOPE per hospitalization= Rs 22,604            |
| 20 |  |  |  |                                                     |
| 21 |  |  |  | Median OOPE per hospitalization= Rs 11,300          |
| 22 |  |  |  |                                                     |
| 23 |  |  |  | Incidence of CHE-10= 62.4                           |
| 24 |  |  |  |                                                     |
| 25 |  |  |  | Incidence of CHE-25 30.0                            |
| 26 |  |  |  |                                                     |
| 27 |  |  |  | Impoverishment= 19.1                                |
| 28 |  |  |  |                                                     |
| 29 |  |  |  | B) Private provider with PFHI                       |
| 30 |  |  |  |                                                     |
| 31 |  |  |  | Mean OOPE per hospitalization= Rs 17,741            |
| 32 |  |  |  |                                                     |
| 33 |  |  |  | Median OOPE per hospitalization= Rs 10,120          |
| 34 |  |  |  |                                                     |
| 35 |  |  |  | Incidence of CHE-10= 60.0                           |
| 36 |  |  |  |                                                     |
| 37 |  |  |  |                                                     |
| 38 |  |  |  |                                                     |
| 39 |  |  |  |                                                     |
| 40 |  |  |  |                                                     |
| 41 |  |  |  |                                                     |
| 42 |  |  |  |                                                     |
| 43 |  |  |  |                                                     |
| 44 |  |  |  |                                                     |
| 45 |  |  |  |                                                     |
| 46 |  |  |  |                                                     |
| 47 |  |  |  |                                                     |



1  
2  
3  
4  
5  
6  
7  
8  
9  
10  
11  
12  
13  
14  
15  
16  
17  
18  
19  
20  
21  
22  
23  
24  
25  
26  
27  
28  
29  
30  
31  
32  
33  
34  
35  
36  
37  
38  
39  
40  
41  
42  
43  
44  
45  
46  
47

|  |  |  |  |                                                                                                                                                                                                                                                                                                                                                                                                                                                                                                                                     |
|--|--|--|--|-------------------------------------------------------------------------------------------------------------------------------------------------------------------------------------------------------------------------------------------------------------------------------------------------------------------------------------------------------------------------------------------------------------------------------------------------------------------------------------------------------------------------------------|
|  |  |  |  | <p>Incidence of CHE-25= 29.2</p> <p>Impoverishment= 18.2</p> <p>C) Public provider without any insurance</p> <p>Mean OOPE per hospitalization= Rs 4919</p> <p>Median OOPE per hospitalization= Rs 1451</p> <p>Incidence of CHE-10= 16.1</p> <p>Incidence of CHE-25= 6.0</p> <p>Impoverishment= 6.8</p> <p>D) Public provider with PFHI</p> <p>Mean OOPE per hospitalization= Rs 3204</p> <p>Median OOPE per hospitalization= Rs 950</p> <p>Incidence of CHE-10= 14.8</p> <p>Incidence of CHE-25= 5.6</p> <p>Impoverishment= 4.6</p> |
|--|--|--|--|-------------------------------------------------------------------------------------------------------------------------------------------------------------------------------------------------------------------------------------------------------------------------------------------------------------------------------------------------------------------------------------------------------------------------------------------------------------------------------------------------------------------------------------|

For peer review only

|                                |                                                                                                              |                                                                                                                                                                                 |                                                                                                                                                                                                                                                                                                                                  |                                                                                                                                                                                                                                                                                                                                                                                                                                                                                                                                                                                                                                                                                 |
|--------------------------------|--------------------------------------------------------------------------------------------------------------|---------------------------------------------------------------------------------------------------------------------------------------------------------------------------------|----------------------------------------------------------------------------------------------------------------------------------------------------------------------------------------------------------------------------------------------------------------------------------------------------------------------------------|---------------------------------------------------------------------------------------------------------------------------------------------------------------------------------------------------------------------------------------------------------------------------------------------------------------------------------------------------------------------------------------------------------------------------------------------------------------------------------------------------------------------------------------------------------------------------------------------------------------------------------------------------------------------------------|
| <p><b>Rao et al., 2014</b></p> | <p>A difference-in-differences (DID) study using repeated cross-sectional surveys with parallel control.</p> | <p>NSSO 2004 survey, A total of 5314 and 5059 households from MH and AP were surveyed by the NSSO in 2004 and Survey in 2012 included 10 073 (MH) and 8623 (AP) households.</p> | <p>PFHI covered: Arogyashree Two cross-sectional surveys: as a baseline, the data from the NSSO 2004 survey collected before the Aarogyasri and RSBY schemes were launched; and as postintervention, a survey using the same methodology conducted in 2012. A survey of 18 696 households across 2 states and 1871 locations</p> | <p>1) <b>Inpatient OOPE</b> (In INR) 2012 compared to 2004: 1 year prior to survey after deducting reimbursement from total expenditure, if any.<br/>Both the states: unadjusted DID=-498.2, 95% CI -792.9 to -203.5, p=0.0009 and adjusted: -565.8 (862.9 to -268.6) 0.0002<br/><b>Subgroup analysis based on HH head characteristics:</b><br/>a) Gender<br/>Male: Mean DID: -513.7 (-843.9 to -183.4) p=0.0023, female it was not significant.<br/>b) Social group:<br/>SC: Mean DID -708.7 (-1234.3 to -183.2) p=0.0082<br/>All other groups: Mean DID -1110.46 (-1868 to -352.9) p=0.0041<br/>For ST and other excluded groups, it was not significant.<br/>c) Location</p> |
|--------------------------------|--------------------------------------------------------------------------------------------------------------|---------------------------------------------------------------------------------------------------------------------------------------------------------------------------------|----------------------------------------------------------------------------------------------------------------------------------------------------------------------------------------------------------------------------------------------------------------------------------------------------------------------------------|---------------------------------------------------------------------------------------------------------------------------------------------------------------------------------------------------------------------------------------------------------------------------------------------------------------------------------------------------------------------------------------------------------------------------------------------------------------------------------------------------------------------------------------------------------------------------------------------------------------------------------------------------------------------------------|

1  
2  
3  
4  
5  
6  
7  
8  
9  
10  
11  
12  
13  
14  
15  
16  
17  
18  
19  
20  
21  
22  
23  
24  
25  
26  
27  
28  
29  
30  
31  
32  
33  
34  
35  
36  
37  
38  
39  
40  
41  
42  
43  
44  
45  
46  
47

|  |  |  |  |                                                                                                                                                                                                                                                                                                                                                                                                                                                                                                                                                                                                                                                                                           |
|--|--|--|--|-------------------------------------------------------------------------------------------------------------------------------------------------------------------------------------------------------------------------------------------------------------------------------------------------------------------------------------------------------------------------------------------------------------------------------------------------------------------------------------------------------------------------------------------------------------------------------------------------------------------------------------------------------------------------------------------|
|  |  |  |  | <p>Rural: Mean DID -504 (-801.9 to -206.0) p=0.0009,<br/>for Urban it was not significant</p> <p>d) Quintile</p> <p>Poorest: Mean DID -1001.3 (-1751 to -251.7)<br/>p=0.0089</p> <p>Middle: Mean DID -798.1 (-1362.9 to -233.3) p=<br/>0.0056</p> <p>For second, fourth and fifth quintile it was not<br/>significant.</p> <p>2) <b>Large inpatient OOPE</b> (A HH with OOPE for<br/>inpatient care was equal to or greater than INR 23,000<br/>(USD419)).</p> <p>Adjusted for both states, Mean DID=-1.8, 95% CI -3<br/>to -0.7, p=0.0009</p> <p><b>Subgroup analysis based on HH head<br/>characteristics:</b></p> <p>Quintile: Poorest: Mean DID -0.2 (-3.8 to -0.19)<br/>p=0.0307</p> |
|--|--|--|--|-------------------------------------------------------------------------------------------------------------------------------------------------------------------------------------------------------------------------------------------------------------------------------------------------------------------------------------------------------------------------------------------------------------------------------------------------------------------------------------------------------------------------------------------------------------------------------------------------------------------------------------------------------------------------------------------|

For peer review only

|    |  |  |  |                                                             |
|----|--|--|--|-------------------------------------------------------------|
| 1  |  |  |  |                                                             |
| 2  |  |  |  |                                                             |
| 3  |  |  |  |                                                             |
| 4  |  |  |  | For other quintile variables, gender, social groups,        |
| 5  |  |  |  | location it was not significant.                            |
| 6  |  |  |  |                                                             |
| 7  |  |  |  | 3) <b>Large borrowing</b> (if the borrowing was equal to or |
| 8  |  |  |  | exceeded the BPL threshold set by the Government of         |
| 9  |  |  |  | AP: INR 70 000 for urban families and 65000 for rural       |
| 10 |  |  |  | HHs)                                                        |
| 11 |  |  |  | In both states: Unadjusted Mean DID: -3.7 (-6.4 to          |
| 12 |  |  |  | -0.908) p=0.0100 and adjusted DID=-4, 95% CI -6.6           |
| 13 |  |  |  | to -1.4, p=0.0032                                           |
| 14 |  |  |  | <b>Subgroup analysis based on HH head</b>                   |
| 15 |  |  |  | <b>characteristics:</b>                                     |
| 16 |  |  |  | a) Gender                                                   |
| 17 |  |  |  | Male: Mean DID -3.6 (-6.6 to -0.62) p=0.0187                |
| 18 |  |  |  | Female: Mean DID -4.7 (-8.3 to -1) p=0.0137                 |
| 19 |  |  |  | b) Social group                                             |
| 20 |  |  |  | ST: Mean DID -5.5 (-9.3 to -1.8) p=0.0048                   |
| 21 |  |  |  | All other groups: Mean DID -4.1 (-7.9 to                    |
| 22 |  |  |  | -0.4.0) p=0.0302                                            |
| 23 |  |  |  |                                                             |
| 24 |  |  |  |                                                             |
| 25 |  |  |  |                                                             |
| 26 |  |  |  |                                                             |
| 27 |  |  |  |                                                             |
| 28 |  |  |  |                                                             |
| 29 |  |  |  |                                                             |
| 30 |  |  |  |                                                             |
| 31 |  |  |  |                                                             |
| 32 |  |  |  |                                                             |
| 33 |  |  |  |                                                             |
| 34 |  |  |  |                                                             |
| 35 |  |  |  |                                                             |
| 36 |  |  |  |                                                             |
| 37 |  |  |  |                                                             |
| 38 |  |  |  |                                                             |
| 39 |  |  |  |                                                             |
| 40 |  |  |  |                                                             |
| 41 |  |  |  |                                                             |
| 42 |  |  |  |                                                             |
| 43 |  |  |  |                                                             |
| 44 |  |  |  |                                                             |
| 45 |  |  |  |                                                             |
| 46 |  |  |  |                                                             |
| 47 |  |  |  |                                                             |

1  
2  
3  
4  
5  
6  
7  
8  
9  
10  
11  
12  
13  
14  
15  
16  
17  
18  
19  
20  
21  
22  
23  
24  
25  
26  
27  
28  
29  
30  
31  
32  
33  
34  
35  
36  
37  
38  
39  
40  
41  
42  
43  
44  
45  
46  
47

|  |  |  |  |                                                                                                                                                                                                                                                                                                           |
|--|--|--|--|-----------------------------------------------------------------------------------------------------------------------------------------------------------------------------------------------------------------------------------------------------------------------------------------------------------|
|  |  |  |  | <p>For SC and Other excluded groups, it was not significant.</p> <p>c) Location</p> <p>Rural: Mean DID -4.7 (-7.3 to -2.1) p=0.0007, for urban it was not significant</p> <p>d) Quintile</p> <p>Poorest: Mean DID -9 (-14 to -4.4) p=0.0002</p> <p>For others quintile groups it was not significant.</p> |
|--|--|--|--|-----------------------------------------------------------------------------------------------------------------------------------------------------------------------------------------------------------------------------------------------------------------------------------------------------------|

For peer review only

|                                                                                                                                                                                                                                                                                                                                                                             |                                             |                                                                                                              |                                                                                                              |                                                                                                                                                                                                                                                                                                                                                                                                                                                                                                                                                                                                                                                                                                                                 |
|-----------------------------------------------------------------------------------------------------------------------------------------------------------------------------------------------------------------------------------------------------------------------------------------------------------------------------------------------------------------------------|---------------------------------------------|--------------------------------------------------------------------------------------------------------------|--------------------------------------------------------------------------------------------------------------|---------------------------------------------------------------------------------------------------------------------------------------------------------------------------------------------------------------------------------------------------------------------------------------------------------------------------------------------------------------------------------------------------------------------------------------------------------------------------------------------------------------------------------------------------------------------------------------------------------------------------------------------------------------------------------------------------------------------------------|
| <p>1<br/>2<br/>3<br/>4<br/>5<br/>6<br/>7<br/>8<br/>9<br/>10<br/>11<br/>12<br/>13<br/>14<br/>15<br/>16<br/>17<br/>18<br/>19<br/>20<br/>21<br/>22<br/>23<br/>24<br/>25<br/>26<br/>27<br/>28<br/>29<br/>30<br/>31<br/>32<br/>33<br/>34<br/>35<br/>36<br/>37<br/>38<br/>39<br/>40<br/>41<br/>42<br/>43<br/>44<br/>45<br/>46<br/>47</p> <p><b>Ravi &amp; Bergkvist, 2014</b></p> | <p>Analysis of a cross sectional survey</p> | <p>NSSO data for consumption expenditure</p> <p>Difference-in-differences method and regression analysis</p> | <p>PFHI covered: Different PFHI schemes</p> <p>Pre and post analysis of the effects of different schemes</p> | <p><b>1) Means of outcome: Impoverishment</b></p> <p><b>For overall sample</b></p> <p>A) Overall impoverishment</p> <p>Treatment: Pre: 0.281 (−0.003); Post: 0.207 (−0.004);</p> <p>Diff: −0.074 (−0.005)</p> <p>Control: Pre: 0.357(−0.003); Post: 0.276(−0.004);</p> <p>Diff: −0.081(−0.005)</p> <p>Difference:</p> <p>Pre: −0.076(−0.004); Post: −0.069(−0.006); Diff: 0.007(−0.007)</p> <p>B) OOP impoverishment</p> <p>Treatment: Pre: 0.321(−0.003); Post: 0.24 (−0.004);</p> <p>Diff: −0.081 (−0.005)</p> <p>Control: Pre: 0.401 (−0.003); Post: 0.312 (−0.004);</p> <p>Diff: −0.089 (−0.005)</p> <p>Difference: Pre: −0.08 (−0.004); Post: −0.072 (−0.006); Diff: 0.008 (−0.007)</p> <p><b>For long term sample</b></p> |
|-----------------------------------------------------------------------------------------------------------------------------------------------------------------------------------------------------------------------------------------------------------------------------------------------------------------------------------------------------------------------------|---------------------------------------------|--------------------------------------------------------------------------------------------------------------|--------------------------------------------------------------------------------------------------------------|---------------------------------------------------------------------------------------------------------------------------------------------------------------------------------------------------------------------------------------------------------------------------------------------------------------------------------------------------------------------------------------------------------------------------------------------------------------------------------------------------------------------------------------------------------------------------------------------------------------------------------------------------------------------------------------------------------------------------------|

1  
2  
3  
4  
5  
6  
7  
8  
9  
10  
11  
12  
13  
14  
15  
16  
17  
18  
19  
20  
21  
22  
23  
24  
25  
26  
27  
28  
29  
30  
31  
32  
33  
34  
35  
36  
37  
38  
39  
40  
41  
42  
43  
44  
45  
46  
47

|  |  |  |  |                                                                                                                                                                                                                                                                                                                                                                                                                                                                                                                                                                                                                                                                                                                                                                |
|--|--|--|--|----------------------------------------------------------------------------------------------------------------------------------------------------------------------------------------------------------------------------------------------------------------------------------------------------------------------------------------------------------------------------------------------------------------------------------------------------------------------------------------------------------------------------------------------------------------------------------------------------------------------------------------------------------------------------------------------------------------------------------------------------------------|
|  |  |  |  | <p>A) Overall impoverishment</p> <p>Treatment: Pre: 0.273 (-0.004); Post: 0.169 (-0.005);<br/>Diff: -0.104 (-0.007)</p> <p>Control: Pre: 0.335 (-0.002); Post: 0.266 (-0.003);<br/>Diff: -0.069 (-0.004)</p> <p>Difference: Pre: -0.062 (-0.005); Post: -0.097 (-0.006); Diff: -0.035 (-0.008)</p> <p>B) OOP impoverishment</p> <p>Treatment: Pre: 0.306 (-0.004); Post: 0.193 (-0.006);<br/>Diff: -0.113 (-0.007)</p> <p>Control: Pre: 0.38 (-0.002); Post: 0.303 (-0.003);<br/>Diff: -0.077 (-0.004)</p> <p>Difference: Pre: -0.074 (-0.005); Post: -0.11 (-0.007); Diff: -0.036 (-0.008)</p> <p><b>2) Means of Outcomes, Catastrophic Headcount</b></p> <p><b>Threshold—40% of Non-food Expenditure</b></p> <p><b>For overall sample:</b></p> <p>A) OOP</p> |
|--|--|--|--|----------------------------------------------------------------------------------------------------------------------------------------------------------------------------------------------------------------------------------------------------------------------------------------------------------------------------------------------------------------------------------------------------------------------------------------------------------------------------------------------------------------------------------------------------------------------------------------------------------------------------------------------------------------------------------------------------------------------------------------------------------------|

For peer review only

1  
2  
3  
4  
5  
6  
7  
8  
9  
10  
11  
12  
13  
14  
15  
16  
17  
18  
19  
20  
21  
22  
23  
24  
25  
26  
27  
28  
29  
30  
31  
32  
33  
34  
35  
36  
37  
38  
39  
40  
41  
42  
43  
44  
45  
46  
47

|  |  |  |  |                                                                                                                                                                                                                                                                                                                                                                                                                                                                                                                                                                                                                                                                                                                                                                     |
|--|--|--|--|---------------------------------------------------------------------------------------------------------------------------------------------------------------------------------------------------------------------------------------------------------------------------------------------------------------------------------------------------------------------------------------------------------------------------------------------------------------------------------------------------------------------------------------------------------------------------------------------------------------------------------------------------------------------------------------------------------------------------------------------------------------------|
|  |  |  |  | <p>Treatment: Pre: 0.0466 (–0.0013); Post: 0.0448 (–0.0018); Diff: –0.0018 (–0.0022)</p> <p>Control: Pre: 0.0453 (–0.0013); Post: 0.036 (–0.0017); Diff: –0.0093 (–0.0021)</p> <p>Difference: Pre: 0.0013 (–0.0018); Post: 0.0088 (–0.0025); Diff: 0.0075 (–0.0031)</p> <p>B) Outpatient</p> <p>Treatment: Pre: 0.0397 (–0.0012); Post: 0.0309 (–0.0016); Diff: –0.0089 (–0.002)</p> <p>Control: Pre: 0.0439 (–0.0013); Post: 0.0254 (–0.0015); Diff: –0.0185 (–0.002)</p> <p>Difference: Pre: –0.0042 (–0.0018); Post: 0.0054 (–0.0022); Diff: 0.0096 (–0.0028)</p> <p>C) Drugs</p> <p>Treatment: Pre: 0.0179 (–0.0008); Post: 0.0167 (–0.0011); Diff: –0.0012 (–0.0014)</p> <p>Control: Pre: 0.0231 (–0.0009); Post: 0.0151 (–0.0012); Diff: –0.008 (–0.0015)</p> |
|--|--|--|--|---------------------------------------------------------------------------------------------------------------------------------------------------------------------------------------------------------------------------------------------------------------------------------------------------------------------------------------------------------------------------------------------------------------------------------------------------------------------------------------------------------------------------------------------------------------------------------------------------------------------------------------------------------------------------------------------------------------------------------------------------------------------|



1  
2  
3  
4  
5  
6  
7  
8  
9  
10  
11  
12  
13  
14  
15  
16  
17  
18  
19  
20  
21  
22  
23  
24  
25  
26  
27  
28  
29  
30  
31  
32  
33  
34  
35  
36  
37  
38  
39  
40  
41  
42  
43  
44  
45  
46  
47

|  |  |  |  |                                                                                                                                                                                                                                                                                                                                                                                                                                                                                                                                                                                                                                                                                                                          |
|--|--|--|--|--------------------------------------------------------------------------------------------------------------------------------------------------------------------------------------------------------------------------------------------------------------------------------------------------------------------------------------------------------------------------------------------------------------------------------------------------------------------------------------------------------------------------------------------------------------------------------------------------------------------------------------------------------------------------------------------------------------------------|
|  |  |  |  | <p>Difference: Pre: -0.0052 (-0.0012); Post: 0.0016 (-0.0016); Diff: 0.0068 (-0.002)</p> <p><b>Long term sample</b></p> <p>A) OOP</p> <p>Treatment: Pre: 0.0389 (-0.0018); Post: 0.0367 (-0.0026); Diff: -0.0022 (-0.0032)</p> <p>Control: Pre: 0.0479 (-0.001); Post: 0.0411 (-0.0014); Diff: -0.0067 (-0.0018)</p> <p>Difference: Pre: -0.009 (-0.0021); Post: -0.0044 (-0.003); Diff: 0.0046 (-0.0037)</p> <p>B) Outpatient</p> <p>Treatment: Pre: 0.0332 (-0.0017); Post: 0.0282 (-0.0025); Diff: -0.005 (-0.003)</p> <p>Control: Pre: 0.0444 (-0.001); Post: 0.0279 (-0.0012); Diff: -0.0165 (-0.0016)</p> <p>Difference: Pre: -0.0112 (-0.002); Post: 0.0003 (-0.0027); Diff: 0.0115 (-0.0034)</p> <p>C) Drugs</p> |
|--|--|--|--|--------------------------------------------------------------------------------------------------------------------------------------------------------------------------------------------------------------------------------------------------------------------------------------------------------------------------------------------------------------------------------------------------------------------------------------------------------------------------------------------------------------------------------------------------------------------------------------------------------------------------------------------------------------------------------------------------------------------------|

For peer review only

|    |  |  |  |                                                        |
|----|--|--|--|--------------------------------------------------------|
| 1  |  |  |  | Treatment: Pre: 0.011 (–0.001); Post: 0.0095 (–        |
| 2  |  |  |  | 0.0013); Diff: –0.0015 (–0.0016)                       |
| 3  |  |  |  | Control: Pre: 0.0234 (–0.0007); Post: 0.0176 (–        |
| 4  |  |  |  | 0.001); Diff: –0.0058 (–0.0012)                        |
| 5  |  |  |  | Difference: Pre: –0.0124 (–0.0012); Post: –0.0082 (–   |
| 6  |  |  |  | 0.0016); Diff: 0.0042 (–0.002)                         |
| 7  |  |  |  | <b>3) Changes in poverty gap index overtime</b>        |
| 8  |  |  |  | <b>For overall sample</b>                              |
| 9  |  |  |  | A) Overall PGI                                         |
| 10 |  |  |  | Treatment: Pre: 0.059 (–0.0009); Post: 0.04 (–0.001);  |
| 11 |  |  |  | Diff: –0.019 (–0.0013)                                 |
| 12 |  |  |  | ;Control: Pre: 0.079 (–0.0008); Post: 0.056 (–0.0011); |
| 13 |  |  |  | Diff: –0.023 (–0.0013)                                 |
| 14 |  |  |  | Difference: Pre: –0.02 (–0.001); Post: –0.016 (–       |
| 15 |  |  |  | 0.001); Diff: 0.004 (–0.002)                           |
| 16 |  |  |  | B) OOP PGI                                             |
| 17 |  |  |  | Treatment: Pre: 0.07(–0.0009); Post: 0.048 (–0.001);   |
| 18 |  |  |  | Diff: –0.022 (–0.0014)                                 |
| 19 |  |  |  |                                                        |
| 20 |  |  |  |                                                        |
| 21 |  |  |  |                                                        |
| 22 |  |  |  |                                                        |
| 23 |  |  |  |                                                        |
| 24 |  |  |  |                                                        |
| 25 |  |  |  |                                                        |
| 26 |  |  |  |                                                        |
| 27 |  |  |  |                                                        |
| 28 |  |  |  |                                                        |
| 29 |  |  |  |                                                        |
| 30 |  |  |  |                                                        |
| 31 |  |  |  |                                                        |
| 32 |  |  |  |                                                        |
| 33 |  |  |  |                                                        |
| 34 |  |  |  |                                                        |
| 35 |  |  |  |                                                        |
| 36 |  |  |  |                                                        |
| 37 |  |  |  |                                                        |
| 38 |  |  |  |                                                        |
| 39 |  |  |  |                                                        |
| 40 |  |  |  |                                                        |
| 41 |  |  |  |                                                        |
| 42 |  |  |  |                                                        |
| 43 |  |  |  |                                                        |
| 44 |  |  |  |                                                        |
| 45 |  |  |  |                                                        |
| 46 |  |  |  |                                                        |
| 47 |  |  |  |                                                        |

1  
2  
3  
4  
5  
6  
7  
8  
9  
10  
11  
12  
13  
14  
15  
16  
17  
18  
19  
20  
21  
22  
23  
24  
25  
26  
27  
28  
29  
30  
31  
32  
33  
34  
35  
36  
37  
38  
39  
40  
41  
42  
43  
44  
45  
46  
47

|  |  |  |  |                                                                                                                                                                                                                                                                                                                                                                                                                                                                                                                                                                                                                                                  |
|--|--|--|--|--------------------------------------------------------------------------------------------------------------------------------------------------------------------------------------------------------------------------------------------------------------------------------------------------------------------------------------------------------------------------------------------------------------------------------------------------------------------------------------------------------------------------------------------------------------------------------------------------------------------------------------------------|
|  |  |  |  | Control: Pre: 0.091 (-0.0009); Post: 0.066 (-0.0011);<br>Diff: -0.025 (-0.0014)<br>Difference: Pre: -0.021(-0.001); Post: -0.018 (-0.002); Diff: 0.003 (-0.002)<br>For Long term sample<br>A) Overall PGI<br>Treatment: Pre: 0.058 (-0.0014); Post: 0.032 (-0.0013); Diff: -0.026 (-0.0019)<br>Control: Pre: 0.073 (-0.0007); Post: 0.053 (-0.0008);<br>Diff: -0.02 (-0.0011)<br>Difference: Pre: -0.015(-0.002); Post: -0.021 (-0.002); Diff: -0.006 (-0.002)<br>B) OOP PGI<br>Treatment: Pre: 0.065 (-0.0014); Post: 0.038 (-0.0014); Diff: -0.027 (-0.002)<br>Control: Pre: 0.086 (-0.0007); Post: 0.063 (-0.0009);<br>Diff: -0.023 (-0.0012) |
|--|--|--|--|--------------------------------------------------------------------------------------------------------------------------------------------------------------------------------------------------------------------------------------------------------------------------------------------------------------------------------------------------------------------------------------------------------------------------------------------------------------------------------------------------------------------------------------------------------------------------------------------------------------------------------------------------|

For peer review only

1  
2  
3  
4  
5  
6  
7  
8  
9  
10  
11  
12  
13  
14  
15  
16  
17  
18  
19  
20  
21  
22  
23  
24  
25  
26  
27  
28  
29  
30  
31  
32  
33  
34  
35  
36  
37  
38  
39  
40  
41  
42  
43  
44  
45  
46  
47

|  |  |  |  |                                                                                                                                                                                                                                                                                                                                                                                                                                                                                                                                                                                                                                                                                                                                                                                                                     |
|--|--|--|--|---------------------------------------------------------------------------------------------------------------------------------------------------------------------------------------------------------------------------------------------------------------------------------------------------------------------------------------------------------------------------------------------------------------------------------------------------------------------------------------------------------------------------------------------------------------------------------------------------------------------------------------------------------------------------------------------------------------------------------------------------------------------------------------------------------------------|
|  |  |  |  | <p>Difference: Pre: -0.021(-0.002); Post: -0.025 (-0.002); Diff: -0.004 (-0.002)</p> <p><b>After regression analysis with fixed state effects</b></p> <p><b>Short term impact</b></p> <p><b>1) Impoverishment Effects in Overall Sample</b></p> <p>A) Overall impoverishment: Treatment*Post:<br/>0.0082(-0.0065; p&gt;0.1)</p> <p>B) Impoverishment net of OOP: Treatment*Post:<br/>0.0089(-0.0067; p&gt;0.1)</p> <p>C) Impoverishment net of hospitalization: Treatment<br/>*Post: 0.0063 (-0.0065; p&gt;0.1)</p> <p>D) Impoverishment net of outpatient: Treatment<br/>*Post: 0.0107 (-0.0067; p&gt;0.1)</p> <p>E) Impoverishment net of drugs: Treatment *Post:<br/>0.0094 (-0.0067; p&gt;0.1)</p> <p><b>2) Catastrophic Headcount, Overall sample—</b></p> <p><b>Threshold 40% of Non-food Expenditure</b></p> |
|--|--|--|--|---------------------------------------------------------------------------------------------------------------------------------------------------------------------------------------------------------------------------------------------------------------------------------------------------------------------------------------------------------------------------------------------------------------------------------------------------------------------------------------------------------------------------------------------------------------------------------------------------------------------------------------------------------------------------------------------------------------------------------------------------------------------------------------------------------------------|

1  
2  
3  
4  
5  
6  
7  
8  
9  
10  
11  
12  
13  
14  
15  
16  
17  
18  
19  
20  
21  
22  
23  
24  
25  
26  
27  
28  
29  
30  
31  
32  
33  
34  
35  
36  
37  
38  
39  
40  
41  
42  
43  
44  
45  
46  
47

|  |  |  |  |                                                                                                                                                                                                                                                                                                                                                                                                                                                                                                                                                                                                                                                              |
|--|--|--|--|--------------------------------------------------------------------------------------------------------------------------------------------------------------------------------------------------------------------------------------------------------------------------------------------------------------------------------------------------------------------------------------------------------------------------------------------------------------------------------------------------------------------------------------------------------------------------------------------------------------------------------------------------------------|
|  |  |  |  | <p>A) Due to OOP: Treatment *Post: 0.0075 (−0.003; p&lt;0.05)</p> <p>B) Due to hospitalization: Treatment *Post: 0.0004(−0.0014; p&gt;0.1)</p> <p>C) Due to outpatient: Treatment *Post: 0.0096 (−0.0028; p&lt;0.01)</p> <p>D) Due to drugs: Treatment *Post: 0.0069(−0.002; p&lt;0.01)</p> <p><b>3) Poverty Gap Index, Overall Sample</b></p> <p>A) Poverty gap index: Treatment *Post: 0.0037(−0.0018; p&lt;0.05)</p> <p>B) PGI net of OOP: Treatment *Post: 0.0047(−0.0019; p&lt;0.05)</p> <p>C) PGI net of hospitalization: Treatment *Post: 0.0036(−0.0018; p&lt;0.05)</p> <p>D) PGI net of outpatient: Treatment *Post: 0.0049(−0.0019; p&lt;0.01)</p> |
|--|--|--|--|--------------------------------------------------------------------------------------------------------------------------------------------------------------------------------------------------------------------------------------------------------------------------------------------------------------------------------------------------------------------------------------------------------------------------------------------------------------------------------------------------------------------------------------------------------------------------------------------------------------------------------------------------------------|

For peer review only

1  
2  
3  
4  
5  
6  
7  
8  
9  
10  
11  
12  
13  
14  
15  
16  
17  
18  
19  
20  
21  
22  
23  
24  
25  
26  
27  
28  
29  
30  
31  
32  
33  
34  
35  
36  
37  
38  
39  
40  
41  
42  
43  
44  
45  
46  
47

|  |  |  |  |                                                                                                                                                                                                                                                                                                                                                                                                                                                                                                                                                                                                                                                                                                                                                                                              |
|--|--|--|--|----------------------------------------------------------------------------------------------------------------------------------------------------------------------------------------------------------------------------------------------------------------------------------------------------------------------------------------------------------------------------------------------------------------------------------------------------------------------------------------------------------------------------------------------------------------------------------------------------------------------------------------------------------------------------------------------------------------------------------------------------------------------------------------------|
|  |  |  |  | <p>E) PGI net of drugs: Treatment *Post: 0.0048(–0.0019; p&lt;0.05)</p> <p><b>Long term impact of PFHIS</b></p> <p><b>1) Impoverishment, Long-term Sample</b></p> <p>A) Overall impoverishment: Treatment *Post: –0.0308(–0.0077; p&lt;0.01)</p> <p>B) Impoverishment net of OOP: Treatment *Post: –0.0316(–0.008; p&lt;0.01)</p> <p>C) Impoverishment net of hospitalization: Treatment *Post: –0.0313(–0.0077; p&lt;0.01)</p> <p>D) Impoverishment net of outpatient: Treatment *Post: –0.0293(–0.0079; p&lt;0.01)</p> <p>E) Impoverishment net of drugs: Treatment *Post: –0.0275(–0.0079; p&lt;0.01)</p> <p><b>2) Catastrophic Headcount, Long-term Sample—</b></p> <p><b>Threshold 40% of Non-food Expenditure</b></p> <p>A) Due to OOP: Treatment *Post: 0.0048(–0.0036; p&gt;0.1)</p> |
|--|--|--|--|----------------------------------------------------------------------------------------------------------------------------------------------------------------------------------------------------------------------------------------------------------------------------------------------------------------------------------------------------------------------------------------------------------------------------------------------------------------------------------------------------------------------------------------------------------------------------------------------------------------------------------------------------------------------------------------------------------------------------------------------------------------------------------------------|

1  
2  
3  
4  
5  
6  
7  
8  
9  
10  
11  
12  
13  
14  
15  
16  
17  
18  
19  
20  
21  
22  
23  
24  
25  
26  
27  
28  
29  
30  
31  
32  
33  
34  
35  
36  
37  
38  
39  
40  
41  
42  
43  
44  
45  
46  
47

|  |  |  |  |                                                                                                                                                                                                                                                                                                                                                                                                                                                                                                                                                                                                                                                                        |
|--|--|--|--|------------------------------------------------------------------------------------------------------------------------------------------------------------------------------------------------------------------------------------------------------------------------------------------------------------------------------------------------------------------------------------------------------------------------------------------------------------------------------------------------------------------------------------------------------------------------------------------------------------------------------------------------------------------------|
|  |  |  |  | <p>B) Due to hospitalization: Treatment *Post: -0.0006(-0.0017; p&gt;0.1)</p> <p>C) Due to outpatient: Treatment *Post: 0.0120(-0.0033; p&lt;0.01)</p> <p>D) Due to drugs: Treatment *Post: 0.0045(-0.002; p&lt;0.05)</p> <p><b>3) Poverty Gap Index, Long-term Sample</b></p> <p>A) Poverty gap index: Treatment *Post: -0.0047(-0.0021; p&lt;0.05)</p> <p>B) PGI net of OOP: Treatment *Post: -0.0035(-0.0022; p&gt;0.1)</p> <p>C) PGI net of hospitalization: Treatment *Post: -0.0047(-0.0021; p&lt;0.05)</p> <p>D) PGI net of outpatient: Treatment *Post: -0.0035(-0.0022; p&gt;0.1)</p> <p>E) PGI net of drugs: Treatment *Post: -0.0032(-0.0022; p&gt;0.1)</p> |
|--|--|--|--|------------------------------------------------------------------------------------------------------------------------------------------------------------------------------------------------------------------------------------------------------------------------------------------------------------------------------------------------------------------------------------------------------------------------------------------------------------------------------------------------------------------------------------------------------------------------------------------------------------------------------------------------------------------------|

For peer review only

|                                                   |                                                                                                                 |                                                                                                                                                                                                                                             |                                      |                                                                                                                                                                                                                                                                                                                                                                                                                                                                                                                                                                                                                                                                                                                                                                                                                                                                                                                                             |
|---------------------------------------------------|-----------------------------------------------------------------------------------------------------------------|---------------------------------------------------------------------------------------------------------------------------------------------------------------------------------------------------------------------------------------------|--------------------------------------|---------------------------------------------------------------------------------------------------------------------------------------------------------------------------------------------------------------------------------------------------------------------------------------------------------------------------------------------------------------------------------------------------------------------------------------------------------------------------------------------------------------------------------------------------------------------------------------------------------------------------------------------------------------------------------------------------------------------------------------------------------------------------------------------------------------------------------------------------------------------------------------------------------------------------------------------|
| <p><b>Raza, van de Poel &amp; Panda, 2016</b></p> | <p>Two cross sectional surveys among SHG members themselves or the head of the (households) HHs: Regression</p> | <p>Primary study: Baseline survey: March and May 2010 (3,686 HHs) and follow-up survey: March and April in 2012 (3,318 HHs) and 2013 (3307 HHs). Location: Kanpur Dehat and Pratapgarh districts in Uttar Pradesh and Vaishali in Bihar</p> | <p>PFHI covered: RSBY membership</p> | <p><b>1)) OOP Spending (Log of healthcare expenses conditional on spending (INR):</b> RSBY membership to be associated with a reduction in OOP spending in Bihar (36%) [-0.361* (0.190), n=577]. Pooled: -0.056 (0.170), n=1361 and UP: 0.224 (0.296), n=804 are not significant.</p> <p><b>Sensitivity analysis</b> by restricting the sample to HHs in the bottom two asset tertiles: Bihar it is significant - 0.675 (0.234), n=403, while pooled and UP it is not.</p> <p><b>2) Log of the amount of debt conditional on borrowing (INR):</b> RSBY HHs in Bihar concurrently experience a 55% [-0.547 (0.232), n=457] reduction in the amount of debt incurred in dealing with the cost of hospitalization.</p> <p>Pooled: -0.078 (0.206), n=1100 and UP: 0.251 (0.353), n=643 are not significant.</p> <p><b>Sensitivity analysis</b> by restricting the sample to HHs in the bottom two asset tertiles: Bihar it is significant -</p> |
|---------------------------------------------------|-----------------------------------------------------------------------------------------------------------------|---------------------------------------------------------------------------------------------------------------------------------------------------------------------------------------------------------------------------------------------|--------------------------------------|---------------------------------------------------------------------------------------------------------------------------------------------------------------------------------------------------------------------------------------------------------------------------------------------------------------------------------------------------------------------------------------------------------------------------------------------------------------------------------------------------------------------------------------------------------------------------------------------------------------------------------------------------------------------------------------------------------------------------------------------------------------------------------------------------------------------------------------------------------------------------------------------------------------------------------------------|



1  
2  
3  
4  
5  
6  
7  
8  
9  
10  
11  
12  
13  
14  
15  
16  
17  
18  
19  
20  
21  
22  
23  
24  
25  
26  
27  
28  
29  
30  
31  
32  
33  
34  
35  
36  
37  
38  
39  
40  
41  
42  
43  
44  
45  
46  
47

|                               |                                               |                                                                                                                                                                                                                                                                                            |                                                                                                                                                                                                                                                                                              |                                                                                                                                                                                                                                                                                                                                                                                                                                                                                       |
|-------------------------------|-----------------------------------------------|--------------------------------------------------------------------------------------------------------------------------------------------------------------------------------------------------------------------------------------------------------------------------------------------|----------------------------------------------------------------------------------------------------------------------------------------------------------------------------------------------------------------------------------------------------------------------------------------------|---------------------------------------------------------------------------------------------------------------------------------------------------------------------------------------------------------------------------------------------------------------------------------------------------------------------------------------------------------------------------------------------------------------------------------------------------------------------------------------|
|                               |                                               |                                                                                                                                                                                                                                                                                            |                                                                                                                                                                                                                                                                                              | 0.611 (0.277), n=355, however not for pooled and UP.<br><br>3) <b>Probability of having healthcare expenses conditional on use:</b> not significant irrespective of sensitivity analysis<br><br>4) <b>Probability of debt conditional on use were not significant:</b> not significant sensitivity analysis                                                                                                                                                                           |
| <b>Sabharwal et al., 2014</b> | Quasi experimental mixed methods study design | Two districts were selected for this study: Moradabad district in Uttar Pradesh and Aurangabad district in Maharashtra.<br><br>At the block level (district sub-division), sites were selected where blocks had proportions of SC and Muslim population equal to the district average, and | PFHI covered: RSBY<br><ul style="list-style-type: none"> <li>• Target group: SC, Muslim and upper caste poor households who are beneficiaries of RSBY (whether they have used the smart card or not)</li> <li>• Control group: SC, Muslim and upper caste poor households who are</li> </ul> | Expenditure as inpatient in Treated INR (US\$) 6366.7/ (US\$ 1012) and in controls INR 8444.6/ (US\$ 135) and average treatment effect (ATT) -2077.8 (US\$ -33) and T Stat, -0.87 amongst the total observations of 451- Radius matching<br><br>Expenditure as inpatient in Treated 6350.4 (/US\$10 2) and in controls 9970.0 (US\$ 160) and average treatment effect of - 3619.6*** (US\$ -58) and T stat, -2.44 amongst the total observations of 91- nearest neighborhood matching |

|  |  |                                                                                                                                                                                                                                                                                                                                                                                                                                                                |                                                    |                                                                                                                                                                                                                                                                                                                                                                                                                                                                                                                                                                                                                                                                                                                                                                                                                                  |
|--|--|----------------------------------------------------------------------------------------------------------------------------------------------------------------------------------------------------------------------------------------------------------------------------------------------------------------------------------------------------------------------------------------------------------------------------------------------------------------|----------------------------------------------------|----------------------------------------------------------------------------------------------------------------------------------------------------------------------------------------------------------------------------------------------------------------------------------------------------------------------------------------------------------------------------------------------------------------------------------------------------------------------------------------------------------------------------------------------------------------------------------------------------------------------------------------------------------------------------------------------------------------------------------------------------------------------------------------------------------------------------------|
|  |  | <p>villages were selected with mixed social group populations. Altogether, the study was conducted in 30 villages (14 villages in Moradabad and 16 villages in Aurangabad). The households were randomly selected from each village based on RSBY beneficiary lists and BPL lists. The households in each location were stratified into beneficiary ('treatment') households and non-beneficiary or ('control') households. We included a control group in</p> | <p>eligible for RSBY but who are not enrolled.</p> | <p>Average expenditure as outpatient in INR (US\$) of total observations 882, Expenditure as inpatient in Treated 701 (US\$ 11) in controls 710 (US\$ 11) and ATT -9.3 and a T stat -0.13- Radius matching</p> <p>Average expenditure as outpatient in INR (US\$) of total observations 385 observations, Expenditure as inpatient in Treated 695 (US\$ 11) in controls 710 (US\$ 11) and ATT of 14 with a T stat of 0.29- nearest neighborhood matching</p> <p>Monthly per capita expenditure accounts to 74.0 (US\$ 1) in treated and 66.2 (US\$ 1) in controls and ATT of 7.7 (US\$ 0.12) with a T stat of 0.52- Radius matching</p> <p>Monthly per capita expenditure accounts to 73.1 (US\$ 1) in treated and 63.4 (US\$ 1) in controls and ATT of 9.7 (US\$ 0.16) with a T stat of 0.95- nearest neighborhood matching</p> |
|--|--|----------------------------------------------------------------------------------------------------------------------------------------------------------------------------------------------------------------------------------------------------------------------------------------------------------------------------------------------------------------------------------------------------------------------------------------------------------------|----------------------------------------------------|----------------------------------------------------------------------------------------------------------------------------------------------------------------------------------------------------------------------------------------------------------------------------------------------------------------------------------------------------------------------------------------------------------------------------------------------------------------------------------------------------------------------------------------------------------------------------------------------------------------------------------------------------------------------------------------------------------------------------------------------------------------------------------------------------------------------------------|

|                                          |                                                                                                                                  |                                                                                                                   |                                                                                                                                                                                                                                      |                                                                                                                                                                                                                                                                                                                                                                                                                                                                                                                |
|------------------------------------------|----------------------------------------------------------------------------------------------------------------------------------|-------------------------------------------------------------------------------------------------------------------|--------------------------------------------------------------------------------------------------------------------------------------------------------------------------------------------------------------------------------------|----------------------------------------------------------------------------------------------------------------------------------------------------------------------------------------------------------------------------------------------------------------------------------------------------------------------------------------------------------------------------------------------------------------------------------------------------------------------------------------------------------------|
|                                          |                                                                                                                                  | <p>order to allow measurement of impact, given that this survey does not have a baseline.</p>                     |                                                                                                                                                                                                                                      |                                                                                                                                                                                                                                                                                                                                                                                                                                                                                                                |
| <p><b>Selvaraj &amp; Karan, 2012</b></p> | <p>Two cross sectional surveys (Authors considered as case control approach and Pre-post approach): difference in difference</p> | <p>Secondary data based on two rounds of NSSO data 2003-04 Pre-intervention and 2009-10 as post intervention.</p> | <p>PFHI covered: RSBY and state insurances implemented in 2007-09. <b>RSBY:</b> 247 districts; <b>State insurance:</b> 74 districts (Andhra Pradesh n=23, Karnataka n=22 and Tamil Nadu n=29); and <b>control:</b> 291 districts</p> | <p><b>Changes in average real per capita OOP expenditure of HHs in pre- (2004-05) and post-insurance (2009-10) years</b></p> <p><b>A) Case control findings:</b></p> <p><b>1) 2004-05 (pre-insurance period) (Rs)</b></p> <p><i>a. Non-intervention districts (NID)= OOP total expenditure: 34.01, IP expenditure: 8.05, OP expenditure: 25.96, Medicine expenditure: 24.53</i></p> <p><i>b. Intervention districts (ID)= Expenditure in terms of OOP: 45.56, IP: 12.70, OP: 32.86 and Medicine: 32.27</i></p> |

|  |  |  |  |                                                                                                                                                                                                                                                                                                                                                                                                                                                                                                                                                                                                                                                                                                                                                                                       |
|--|--|--|--|---------------------------------------------------------------------------------------------------------------------------------------------------------------------------------------------------------------------------------------------------------------------------------------------------------------------------------------------------------------------------------------------------------------------------------------------------------------------------------------------------------------------------------------------------------------------------------------------------------------------------------------------------------------------------------------------------------------------------------------------------------------------------------------|
|  |  |  |  | <p><i>c. Difference between ID and NID= Total: 11.55, IP: 4.65, OP: 6.90, Medicine: 7.74.</i></p> <p><b>2) 2009-10 (post-insurance period) (Rs)</b></p> <p><i>a. NID= Expenditure in terms of OOP: 39.70, IP: 13.48, OP: 26.22 &amp; Medicine: 26.90</i></p> <p><i>b. ID= Expenditure in terms of OOP: 48.97, IP: 15.81, OP: 33.16 and Medicine: 33.56.</i></p> <p><i>c. Difference between ID and NID=Total: 9.27, IP: 2.33, OP: 6.94, Medicine: 6.63.</i></p> <p><b>B) Difference between pre- and post-insurance period (Rs)</b></p> <p><i>a. NID=Total: 5.69, IP: 5.43, OP: 0.26, Medicine: 2.37.</i></p> <p><i>b. ID=Total: 3.41, IP: 3.11, OP: 0.30, Medicine: 1.26.</i></p> <p><i>c. Difference between ID and NID= Total: -2.28, IP: -2.32, OP: 0.04, Medicine: -1.11</i></p> |
|--|--|--|--|---------------------------------------------------------------------------------------------------------------------------------------------------------------------------------------------------------------------------------------------------------------------------------------------------------------------------------------------------------------------------------------------------------------------------------------------------------------------------------------------------------------------------------------------------------------------------------------------------------------------------------------------------------------------------------------------------------------------------------------------------------------------------------------|

1  
2  
3  
4  
5  
6  
7  
8  
9  
10  
11  
12  
13  
14  
15  
16  
17  
18  
19  
20  
21  
22  
23  
24  
25  
26  
27  
28  
29  
30  
31  
32  
33  
34  
35  
36  
37  
38  
39  
40  
41  
42  
43  
44  
45  
46  
47

|  |  |  |  |                                                                                                                                                                                                                                                                                                                                                                                                                                                                                                                                                                                                                                                                                                                                                                                                            |
|--|--|--|--|------------------------------------------------------------------------------------------------------------------------------------------------------------------------------------------------------------------------------------------------------------------------------------------------------------------------------------------------------------------------------------------------------------------------------------------------------------------------------------------------------------------------------------------------------------------------------------------------------------------------------------------------------------------------------------------------------------------------------------------------------------------------------------------------------------|
|  |  |  |  | <p><b>Percentage Share of OOP Expenditure in Overall Household Expenditure</b></p> <p><b>A) Case control findings:</b></p> <p><b>1) 2004-05 (pre-insurance period)</b></p> <p><i>a. Non-intervention districts (NID)= OOP total expenditure: 4.88, IP expenditure: 1.16, OP expenditure: 3.73, Medicine expenditure: 3.52</i></p> <p><i>b. Intervention districts (ID)= Expenditure in terms of OOP: 6.33, IP: 1.76, OP: 4.57 and Medicine: 4.48</i></p> <p><i>c. Difference between ID and NID= Total: 1.45, IP: 0.61, OP: 0.84, Medicine: 0.96.</i></p> <p><b>2) 2009-10 (post-insurance period)</b></p> <p><i>a. NID= Expenditure in terms of OOP: 5.21, IP: 1.77, OP: 3.44 &amp; Medicine: 3.53</i></p> <p><i>b. ID= Expenditure in terms of OOP: 5.96, IP: 1.92, OP: 4.04 and Medicine: 4.08.</i></p> |
|--|--|--|--|------------------------------------------------------------------------------------------------------------------------------------------------------------------------------------------------------------------------------------------------------------------------------------------------------------------------------------------------------------------------------------------------------------------------------------------------------------------------------------------------------------------------------------------------------------------------------------------------------------------------------------------------------------------------------------------------------------------------------------------------------------------------------------------------------------|

For peer review only

|    |  |  |  |                                                              |
|----|--|--|--|--------------------------------------------------------------|
| 1  |  |  |  |                                                              |
| 2  |  |  |  |                                                              |
| 3  |  |  |  |                                                              |
| 4  |  |  |  |                                                              |
| 5  |  |  |  | <i>c. Difference between ID and NID=</i> Total: 0.75, IP:    |
| 6  |  |  |  | 0.16, OP: 0.60, Medicine: 0.55.                              |
| 7  |  |  |  |                                                              |
| 8  |  |  |  |                                                              |
| 9  |  |  |  |                                                              |
| 10 |  |  |  | <b>B) Difference between pre- and post-insurance</b>         |
| 11 |  |  |  | <b>period</b>                                                |
| 12 |  |  |  |                                                              |
| 13 |  |  |  |                                                              |
| 14 |  |  |  | <i>a. NID=</i> Total: 0.33, IP: 0.61, OP: -0.29, Medicine:   |
| 15 |  |  |  | 0.01.                                                        |
| 16 |  |  |  |                                                              |
| 17 |  |  |  |                                                              |
| 18 |  |  |  | <i>b. ID=</i> Total: -0.37, IP: 0.16, OP: -0.53, Medicine: - |
| 19 |  |  |  | 0.40.                                                        |
| 20 |  |  |  |                                                              |
| 21 |  |  |  |                                                              |
| 22 |  |  |  | <i>c. Difference between ID and NID=</i> Total: -0.70, IP: - |
| 23 |  |  |  | 0.45, OP: -0.24, Medicine: -0.41                             |
| 24 |  |  |  |                                                              |
| 25 |  |  |  |                                                              |
| 26 |  |  |  |                                                              |
| 27 |  |  |  |                                                              |
| 28 |  |  |  |                                                              |
| 29 |  |  |  | <b>Catastrophic Headcount of OOP Expenditure (%</b>          |
| 30 |  |  |  | <b>of HHs)</b>                                               |
| 31 |  |  |  |                                                              |
| 32 |  |  |  |                                                              |
| 33 |  |  |  | <b>A) Case control findings:</b>                             |
| 34 |  |  |  |                                                              |
| 35 |  |  |  | <b>1) 2004-05 (pre-insurance period)</b>                     |
| 36 |  |  |  |                                                              |
| 37 |  |  |  |                                                              |
| 38 |  |  |  |                                                              |
| 39 |  |  |  |                                                              |
| 40 |  |  |  |                                                              |
| 41 |  |  |  |                                                              |
| 42 |  |  |  |                                                              |
| 43 |  |  |  |                                                              |
| 44 |  |  |  |                                                              |
| 45 |  |  |  |                                                              |
| 46 |  |  |  |                                                              |
| 47 |  |  |  |                                                              |

1  
2  
3  
4  
5  
6  
7  
8  
9  
10  
11  
12  
13  
14  
15  
16  
17  
18  
19  
20  
21  
22  
23  
24  
25  
26  
27  
28  
29  
30  
31  
32  
33  
34  
35  
36  
37  
38  
39  
40  
41  
42  
43  
44  
45  
46  
47

|  |  |  |  |                                                                                                                                                                                                                                                                                                                                                                                                                                                                                                                                                                                                                                                                                                                                                                                                                                                                                       |
|--|--|--|--|---------------------------------------------------------------------------------------------------------------------------------------------------------------------------------------------------------------------------------------------------------------------------------------------------------------------------------------------------------------------------------------------------------------------------------------------------------------------------------------------------------------------------------------------------------------------------------------------------------------------------------------------------------------------------------------------------------------------------------------------------------------------------------------------------------------------------------------------------------------------------------------|
|  |  |  |  | <p><i>a. Non-intervention districts (NID)= OOP total expenditure: 11.65, IP expenditure: 2.37, OP expenditure: 9.71, Medicine expenditure: 8.45</i></p> <p><i>b. Intervention districts (ID)= Expenditure in terms of OOP: 15.89, IP: 3.53, OP: 13.23 and Medicine: 11.06.</i></p> <p><i>c. Difference between ID and NID= Total: 4.24, IP: 1.16, OP: 3.52, Medicine: 2.61.</i></p> <p><b>2) 2009-10 (post-insurance period)</b></p> <p><i>a. NID= Expenditure in terms of OOP: 11.01, IP: 2.76, OP: 7.99 &amp; Medicine: 6.75</i></p> <p><i>b. ID= Expenditure in terms of OOP: 14.90, IP: 4.06, OP: 10.84 and Medicine: 09.26.</i></p> <p><i>c. Difference between ID and NID= Total: 3.90, IP: 1.30, OP: 2.86, Medicine: 2.51.</i></p> <p><b>B) Difference between pre- and post-insurance period</b></p> <p><i>a. NID= Total: -0.65, IP: 0.39, OP: -1.72 Medicine: -1.70.</i></p> |
|--|--|--|--|---------------------------------------------------------------------------------------------------------------------------------------------------------------------------------------------------------------------------------------------------------------------------------------------------------------------------------------------------------------------------------------------------------------------------------------------------------------------------------------------------------------------------------------------------------------------------------------------------------------------------------------------------------------------------------------------------------------------------------------------------------------------------------------------------------------------------------------------------------------------------------------|

For peer review only

|    |  |  |  |  |
|----|--|--|--|--|
| 1  |  |  |  |  |
| 2  |  |  |  |  |
| 3  |  |  |  |  |
| 4  |  |  |  |  |
| 5  |  |  |  |  |
| 6  |  |  |  |  |
| 7  |  |  |  |  |
| 8  |  |  |  |  |
| 9  |  |  |  |  |
| 10 |  |  |  |  |
| 11 |  |  |  |  |
| 12 |  |  |  |  |
| 13 |  |  |  |  |
| 14 |  |  |  |  |
| 15 |  |  |  |  |
| 16 |  |  |  |  |
| 17 |  |  |  |  |
| 18 |  |  |  |  |
| 19 |  |  |  |  |
| 20 |  |  |  |  |
| 21 |  |  |  |  |
| 22 |  |  |  |  |
| 23 |  |  |  |  |
| 24 |  |  |  |  |
| 25 |  |  |  |  |
| 26 |  |  |  |  |
| 27 |  |  |  |  |
| 28 |  |  |  |  |
| 29 |  |  |  |  |
| 30 |  |  |  |  |
| 31 |  |  |  |  |
| 32 |  |  |  |  |
| 33 |  |  |  |  |
| 34 |  |  |  |  |
| 35 |  |  |  |  |
| 36 |  |  |  |  |
| 37 |  |  |  |  |
| 38 |  |  |  |  |
| 39 |  |  |  |  |
| 40 |  |  |  |  |
| 41 |  |  |  |  |
| 42 |  |  |  |  |
| 43 |  |  |  |  |
| 44 |  |  |  |  |
| 45 |  |  |  |  |
| 46 |  |  |  |  |
| 47 |  |  |  |  |

*b. ID= Total: -0.99, IP: 0.53, OP: -2.38, Medicine: -1.81.*

*c. Difference between ID and NID= Total: -0.34, IP: 0.14, OP: -0.66, Medicine: -0.10*

**Catastrophic Headcount (%) due to  
of Hospitalization Expenditure**

**1) Pre-insurance years (2004-05)**

*a. Poorest: NID= 0.88, ID= 0.72, difference (Diff)= -0.16*

*b. Second poorest: NID= 1.42, ID= 1.96, Diff= 0.53*

*c. Middle: NID=2.14, ID= 2.61, Diff= 0.47*

*d. Second richest: NID= 2.74, ID= 3.87, Diff= 1.13*

*e. Richest: NID=5.15, ID= 8.14, Diff= 2.99*

**2) Post-insurance years (2009-10)**

*a. Poorest: NID= 0.87, ID= 1.20, Diff= 0.33*

*b. Second poorest: NID= 1.20, ID= 2.36, Diff= 1.16*

*c. Middle: NID=2.20, ID= 3.03, Diff= 0.83*

*d. Second richest: NID= 3.54, ID= 4.93, Diff= 1.39*



1  
2  
3  
4  
5  
6  
7  
8  
9  
10  
11  
12  
13  
14  
15  
16  
17  
18  
19  
20  
21  
22  
23  
24  
25  
26  
27  
28  
29  
30  
31  
32  
33  
34  
35  
36  
37  
38  
39  
40  
41  
42  
43  
44  
45  
46  
47

|                    |                                            |                                                                                                                                                                                                          |                                                                                                                                                                                                                |                                                                                                                                                                                                                                                                                                                                                                                                                                              |
|--------------------|--------------------------------------------|----------------------------------------------------------------------------------------------------------------------------------------------------------------------------------------------------------|----------------------------------------------------------------------------------------------------------------------------------------------------------------------------------------------------------------|----------------------------------------------------------------------------------------------------------------------------------------------------------------------------------------------------------------------------------------------------------------------------------------------------------------------------------------------------------------------------------------------------------------------------------------------|
|                    |                                            |                                                                                                                                                                                                          |                                                                                                                                                                                                                | <p><i>e. Richest: NID=7.05, ID= 8.27, Diff= 1.22.</i></p> <p><b>3) Difference between pre- and post-insurance years</b></p> <p><i>a. Poorest: NID= -0.01, ID= 0.48, Diff= 0.50</i></p> <p><i>b. Second poorest: NID= -0.22, ID= 0.40, Diff= 0.62</i></p> <p><i>c. Middle: NID=0.06, ID= 0.42, Diff= 0.36</i></p> <p><i>d. Second richest: NID= 0.80, ID= 1.06, Diff= 0.26</i></p> <p><i>e. Richest: NID=1.90, ID= 0.13, Diff= -1.77.</i></p> |
| <b>Sinha, 2018</b> | A matched controlled cross-sectional study | In order to see whether different characteristics of enrolled and non-enrolled households were matching, z-test was performed comparing the proportion of the characteristics of two sets of households. | PFHI covered: RSBY a sample size of 425 households was estimated with 80 per cent power to detect the change in CHE between insured and non-insured households' arm for each block<br><br>Duration of 3 months | <p>1.The determinant of incidence of Catastrophic Health Expenditure (CHE) Among the Studied Households, households enrolled in RSBY co-efficient-0.077, SE 0.181 and odds ratio of 0.925</p> <p>2. The Determinant of Incidence of Health Expenditure-Induced Poverty Among the Studied Households Which Are at Risk of Becoming Poor, households enrolled in RSBY co-efficient-0.422, SE 0.195, Odds ratio of 1.524</p>                    |

|                         |                                                                              |                                                                                                                                   |                                                                                                                                                                                                                                                                                           |                                                                                                                                                                                       |
|-------------------------|------------------------------------------------------------------------------|-----------------------------------------------------------------------------------------------------------------------------------|-------------------------------------------------------------------------------------------------------------------------------------------------------------------------------------------------------------------------------------------------------------------------------------------|---------------------------------------------------------------------------------------------------------------------------------------------------------------------------------------|
|                         |                                                                              | two purposively selected administrative blocks, namely Silli and Bundu of Ranchi district in Jharkhand between April to June 2014 |                                                                                                                                                                                                                                                                                           | 3. The Determinants of Hospitalization Among the Studied Households; households enrolled in RSBY, co-efficient 0.884, SE 0.571, Odds ratio of 2.421                                   |
| <b>Sood et al, 2014</b> | Quasi experimental design<br><br>Multi variate models were used for analysis | All households in sampled villages were asked to participate in a door to door survey, and 81% of them completed the survey.      | PFHI covered: VAS 31 476 households (22 796 below poverty line and 8680 above poverty line) in 300 villages where the scheme was implemented and 28 633 households (21 767 below poverty line and 6866 above poverty line) in 272 neighboring matched villages ineligible for the scheme. | Eligible households had significantly reduced OOPE for admissions to hospitals with tertiary care facilities likely to be covered by the scheme (64% reduction, 35% to 97%; P<0.001). |

|                                       |                                                                                                            |                                                   |                                                                                                                                                                                                                     |                                                                                                                                                                                                                                                                                                                                                        |
|---------------------------------------|------------------------------------------------------------------------------------------------------------|---------------------------------------------------|---------------------------------------------------------------------------------------------------------------------------------------------------------------------------------------------------------------------|--------------------------------------------------------------------------------------------------------------------------------------------------------------------------------------------------------------------------------------------------------------------------------------------------------------------------------------------------------|
|                                       |                                                                                                            |                                                   | <p>A government insurance program (Vajpayee Arogyashree scheme) that provided free tertiary care to households below the poverty line in about half of villages in Karnataka from February 2010 to August 2012.</p> |                                                                                                                                                                                                                                                                                                                                                        |
| <p><b>Sriram &amp; Khan, 2020</b></p> | <p>Survey among poor individuals: Propensity score matching, logistic regression and Tobit regression.</p> | <p>NSSO survey 2014. N=64270 poor individuals</p> | <p>PFHI covered: any PFHI scheme PFHI (n= 5917) were matched with control group (n=5917). Average Treatment on Treated (ATT) Propensity Score Testing of Two</p>                                                    | <p><b>Effect of PFHI on inpatient out-of-pocket health expenditures (Tobit regression coefficient and 95% CI)</b><br/> Enrolment did not have any effect on inpatient OOP health expenditures [-950.36 (- 2501.5 – 600.8)].<br/> -Duration of stay in hospital [521.40 (435.3–607.5)],<br/> -Graduate level education [7634.86 (2798.5–12,471.3)],</p> |

|  |  |  |                                                                                                                                                                                                                           |                                                                                                                                                                                                                                                                                                                                                                                                                                                                                                                                                                                                                                                                                                                                                                                                     |
|--|--|--|---------------------------------------------------------------------------------------------------------------------------------------------------------------------------------------------------------------------------|-----------------------------------------------------------------------------------------------------------------------------------------------------------------------------------------------------------------------------------------------------------------------------------------------------------------------------------------------------------------------------------------------------------------------------------------------------------------------------------------------------------------------------------------------------------------------------------------------------------------------------------------------------------------------------------------------------------------------------------------------------------------------------------------------------|
|  |  |  | <p>Groups: Treated=0.1407,<br/>Control=<br/>0.1191, Difference=<br/>0.0216, T statistic= 2.89,<br/>SE: 0.0074.<br/>Matched with age,<br/>individual consumption<br/>expenditure, HH size,<br/>location and education.</p> | <p>-Age groups of 19 to 60 years [19 to 40 years 1857.13<br/>(-68.3, - 3782.6) and 41 to 60 years 2231.96 (234.3-<br/>4229.6)],<br/>-Using a private hospital for treatment [3772.82<br/>(1004.0-6541.6)],<br/>-Admission in paying ward [Paying General 9095.49<br/>(6978.9-11,212.1), and Paying Special 13,642.31<br/>(9856.4-17,428.3)], and<br/>-Having ailments and injuries (significant)<br/>-Utilization of AYUSH type of treatment had<br/>significant negative effect [- 9020.48 (-16,224.0 - -<br/>1817.0)] on OOP health expenditures compared to<br/>individuals using allopathic treatment.<br/>-Factors such as location, social group, HH type, HH<br/>size, and number of hospital beds in states had no<br/>statistically significant effect on OOP health<br/>expenditures.</p> |
|--|--|--|---------------------------------------------------------------------------------------------------------------------------------------------------------------------------------------------------------------------------|-----------------------------------------------------------------------------------------------------------------------------------------------------------------------------------------------------------------------------------------------------------------------------------------------------------------------------------------------------------------------------------------------------------------------------------------------------------------------------------------------------------------------------------------------------------------------------------------------------------------------------------------------------------------------------------------------------------------------------------------------------------------------------------------------------|

|                                             |                                                                                   |                                                                                                                                                                                                                                                                                                                              |                                     |                                                                                                                                                                                                                                                                                                                                                                                            |
|---------------------------------------------|-----------------------------------------------------------------------------------|------------------------------------------------------------------------------------------------------------------------------------------------------------------------------------------------------------------------------------------------------------------------------------------------------------------------------|-------------------------------------|--------------------------------------------------------------------------------------------------------------------------------------------------------------------------------------------------------------------------------------------------------------------------------------------------------------------------------------------------------------------------------------------|
|                                             |                                                                                   |                                                                                                                                                                                                                                                                                                                              |                                     | -Gujarat and Kerala states show significantly lower OOP expenses, keeping all other factors constant, than other states of India in the state fixed effects model.                                                                                                                                                                                                                         |
| <b>Willingness to pay</b>                   |                                                                                   |                                                                                                                                                                                                                                                                                                                              |                                     |                                                                                                                                                                                                                                                                                                                                                                                            |
| <b>Vellakkal, Juyal, &amp; Mehedi, 2014</b> | Cross sectional study; contingent valuation method, applied a bidding game method | n=1846, Mean Age: 54.55 (12.23)<br>Proportion of CGHS beneficiary in the sample: 65% and remaining were ECHS beneficiary<br>additional monthly financial contribution towards the scheme<br>beneficiaries was willing to pay for better quality of healthcare services”<br>WTP Version 1: WTP base amount is INR 100 and the | PFHI covered: CGHS and ECHS schemes | -WTP for better quality healthcare under the schemes<br>-Among willing people: how much per month would pay in addition to their current contribution<br>-About 71% of CGHS beneficiaries, 28% of ECHS beneficiaries were willing to pay additionally every month for health insurance schemes.<br>-The amount of WTP by CGHS beneficiaries was 64% higher than their current contribution |

1  
2  
3  
4  
5  
6  
7  
8  
9  
10  
11  
12  
13  
14  
15  
16  
17  
18  
19  
20  
21  
22  
23  
24  
25  
26  
27  
28  
29  
30  
31  
32  
33  
34  
35  
36  
37  
38  
39  
40  
41  
42  
43  
44  
45  
46  
47

|                                                                                                                                                                                                                                                                                                                                                                                                                                                                                                                                                                                                                                                                                                                                                                                                                                                                                                                                                                                                          |  |                                                                                                                                                                                                                                                                                                                                              |  |  |
|----------------------------------------------------------------------------------------------------------------------------------------------------------------------------------------------------------------------------------------------------------------------------------------------------------------------------------------------------------------------------------------------------------------------------------------------------------------------------------------------------------------------------------------------------------------------------------------------------------------------------------------------------------------------------------------------------------------------------------------------------------------------------------------------------------------------------------------------------------------------------------------------------------------------------------------------------------------------------------------------------------|--|----------------------------------------------------------------------------------------------------------------------------------------------------------------------------------------------------------------------------------------------------------------------------------------------------------------------------------------------|--|--|
|                                                                                                                                                                                                                                                                                                                                                                                                                                                                                                                                                                                                                                                                                                                                                                                                                                                                                                                                                                                                          |  | <p>bid amount was INR 10<br/><br/>(10% of the base amount).<br/><br/>WTP Version 2: WTP base<br/><br/>amount was INR 150 and<br/><br/>the bid amount was INR 15<br/><br/>(10% of the base amount).<br/><br/>WTP Version 3: WTP base<br/><br/>amount is INR 200 and the<br/><br/>bid amount was INR 20<br/><br/>(10% of the base amount).</p> |  |  |
| <p>AOR: Adjusted Odds Ratio; AP: Andhra Pradesh; ATT: Average Treatment on Treated; BPL: Below Poverty Line; CGHS; Central Government Health Scheme; CHE: Catastrophic Health Expenditure; CHIS: Comprehensive Health Insurance Scheme; CI: Confidence Interval; DID; Difference-in-Differences; ECHS: Ex-serviceman Contributory Health Scheme; ESIS: Employee State Insurance Scheme; HHs: Households; INR: Indian National Rupee; IP: In-Patient; IV: Instrumental Variable; MSBY: Mukhyamantri Swasthya Bima Yojana; NA: Not Applicable; NSSO: National Sample Survey Office; OLS: Ordinary Least Square; OOP: Out of pocket payment; OOPE: Out Of Pocket Expenditure; OR: Odds Ratio; PMJAY: Pradhan Mantri Jan Arogya Yojana; PSM: Propensity Score Matching; RAS: Rajiv Arogya Shree; RSBY: Rashtriya Swasthya Bima Yojana; SC: Scheduled Castes; SE: Standard Error; SHG: Self Help Groups; UMPCE: Usual Monthly Per Capita Expenditure; VAS: Vajpayee Arogya Shree; WTP: Willingness to Pay</p> |  |                                                                                                                                                                                                                                                                                                                                              |  |  |

1  
2  
3  
4  
5  
6  
7  
8  
9  
10  
11  
12  
13  
14  
15  
16  
17  
18  
19  
20  
21  
22  
23  
24  
25  
26  
27  
28  
29  
30  
31  
32  
33  
34  
35  
36  
37  
38  
39  
40  
41  
42  
43  
44  
45  
46  
47

For peer review only

# BMJ Open

## Impact of public funded health insurances in India on health care utilization and financial risk protection: a systematic review

|                                 |                                                                                                                                                                                                                                                                                                                                                                                                                                                                                                                                                                                                                                                                                                                                                                                                                                                  |
|---------------------------------|--------------------------------------------------------------------------------------------------------------------------------------------------------------------------------------------------------------------------------------------------------------------------------------------------------------------------------------------------------------------------------------------------------------------------------------------------------------------------------------------------------------------------------------------------------------------------------------------------------------------------------------------------------------------------------------------------------------------------------------------------------------------------------------------------------------------------------------------------|
| Journal:                        | <i>BMJ Open</i>                                                                                                                                                                                                                                                                                                                                                                                                                                                                                                                                                                                                                                                                                                                                                                                                                                  |
| Manuscript ID                   | bmjopen-2021-050077.R1                                                                                                                                                                                                                                                                                                                                                                                                                                                                                                                                                                                                                                                                                                                                                                                                                           |
| Article Type:                   | Original research                                                                                                                                                                                                                                                                                                                                                                                                                                                                                                                                                                                                                                                                                                                                                                                                                                |
| Date Submitted by the Author:   | 27-Sep-2021                                                                                                                                                                                                                                                                                                                                                                                                                                                                                                                                                                                                                                                                                                                                                                                                                                      |
| Complete List of Authors:       | B, Reshmi; Manipal Academy of Higher Education (MAHE), Health Information Management, Manipal College of Health Professionals<br>Unnikrishnan, B.; MAHE, Department of Community Medicine, Kasturba Medical College, Mangaluru<br>Rajwar, Eti; MAHE, Public Health Evidence South Asia, Department of Health Information, Prasanna School of Public Health, Manipal Academy of Higher Education<br>Parsekar, Shradha; MAHE, Public Health Evidence South Asia, Department of Health Information, Prasanna School of Public Health, Manipal Academy of Higher Education<br>Vijayamma, Ratheebhai; MAHE, Manipal Institute of Communication<br>VENKATESH, BHUMIKA; Manipal Academy of Higher Education, Public Health Evidence South Asia, Department of Health Information, Prasanna School of Public Health, Manipal Academy of Higher Education |
| <b>Primary Subject Heading</b>: | Health policy                                                                                                                                                                                                                                                                                                                                                                                                                                                                                                                                                                                                                                                                                                                                                                                                                                    |
| Secondary Subject Heading:      | Health economics                                                                                                                                                                                                                                                                                                                                                                                                                                                                                                                                                                                                                                                                                                                                                                                                                                 |
| Keywords:                       | Health policy < HEALTH SERVICES ADMINISTRATION & MANAGEMENT, Health informatics < BIOTECHNOLOGY & BIOINFORMATICS, Public health < INFECTIOUS DISEASES, Epidemiology < INFECTIOUS DISEASES, Quality in health care < HEALTH SERVICES ADMINISTRATION & MANAGEMENT, Organisation of health services < HEALTH SERVICES ADMINISTRATION & MANAGEMENT                                                                                                                                                                                                                                                                                                                                                                                                                                                                                                   |
|                                 |                                                                                                                                                                                                                                                                                                                                                                                                                                                                                                                                                                                                                                                                                                                                                                                                                                                  |

SCHOLARONE™  
Manuscripts





I, the Submitting Author has the right to grant and does grant on behalf of all authors of the Work (as defined in the below author licence), an exclusive licence and/or a non-exclusive licence for contributions from authors who are: i) UK Crown employees; ii) where BMJ has agreed a CC-BY licence shall apply, and/or iii) in accordance with the terms applicable for US Federal Government officers or employees acting as part of their official duties; on a worldwide, perpetual, irrevocable, royalty-free basis to BMJ Publishing Group Ltd ("BMJ") its licensees and where the relevant Journal is co-owned by BMJ to the co-owners of the Journal, to publish the Work in this journal and any other BMJ products and to exploit all rights, as set out in our [licence](#).

The Submitting Author accepts and understands that any supply made under these terms is made by BMJ to the Submitting Author unless you are acting as an employee on behalf of your employer or a postgraduate student of an affiliated institution which is paying any applicable article publishing charge ("APC") for Open Access articles. Where the Submitting Author wishes to make the Work available on an Open Access basis (and intends to pay the relevant APC), the terms of reuse of such Open Access shall be governed by a Creative Commons licence – details of these licences and which [Creative Commons](#) licence will apply to this Work are set out in our licence referred to above.

Other than as permitted in any relevant BMJ Author's Self Archiving Policies, I confirm this Work has not been accepted for publication elsewhere, is not being considered for publication elsewhere and does not duplicate material already published. I confirm all authors consent to publication of this Work and authorise the granting of this licence.

1  
2  
3 1 **Impact of public funded health insurances in India on health care utilization and financial**  
4  
5  
6 2 **risk protection: a systematic review**

7  
8 3 Reshmi B.<sup>1</sup>, B. Unnikrishnan<sup>2</sup>, Eti Rajwar<sup>3</sup>, Shradha S.

9  
10 4 Parsekar<sup>3</sup>, Ratheebhai Vijayamma<sup>4</sup>, Bhumika Tumkur Venkatesh<sup>3\*</sup>

11  
12 5 **Affiliations:**

13  
14  
15 6 <sup>1</sup> Health Information Management, Manipal College of Health Professionals, Manipal Academy  
16  
17 7 of Higher Education (MAHE), Manipal, India

18  
19 8 <sup>2</sup> Department of Community Medicine, Kasturba Medical College, MAHE, Mangaluru, India

20  
21 9 <sup>3</sup> Public Health Evidence South Asia, Prasanna School of Public Health, MAHE, Manipal, India

22  
23 10 <sup>4</sup> Manipal Institute of Communication, MAHE, Manipal, India

24  
25  
26  
27 11 **Email IDs:** Reshmi B: [reshmi.b@manipal.edu](mailto:reshmi.b@manipal.edu); B. Unnikrishnan: [unnikrishnan.b@manipal.edu](mailto:unnikrishnan.b@manipal.edu);

28  
29 12 Eti Rajwar: [eti.rajwar@manipal.edu](mailto:eti.rajwar@manipal.edu); Shradha S Parsekar: [shradha.parsekar@manipal.edu](mailto:shradha.parsekar@manipal.edu);

30  
31 13 Ratheebhai Vijayamma: [rathee63@gmail.com](mailto:rathee63@gmail.com); Bhumika Tumkur Venkatesh:  
32  
33 14 [bhumika.tv@manipal.edu](mailto:bhumika.tv@manipal.edu)

34  
35  
36  
37 15 **\*Corresponding author:**

38  
39 16 Room No. 35, Public Health Evidence South Asia, Prasanna School of Public Health, MAHE,

40  
41 17 Manipal 576104, Karnataka, India; Telephone: 08202923449; Email: [bhumika.tv@manipal.edu](mailto:bhumika.tv@manipal.edu)

## 23 Abstract

24 **Objective** Universal Health Coverage aims to address the challenges posed by healthcare  
25 inequalities and inequities by increasing the accessibility and affordability of healthcare for the  
26 entire population. This review provides information related to impact of public funded health  
27 insurance (PFHI) on financial risk protection and utilization of healthcare.

28 **Design:** Systematic review

29 **Data Sources:** Medline (via PubMed, Web of Science), Scopus, Social Science Research Network  
30 and 3ie impact evaluation repository were searched from their inception until 15 July 2020, for  
31 English language publications.

32 **Eligibility criteria:** Studies giving information about the different PFHI in India, irrespective of  
33 population groups (above 18 years) were included. Cross-sectional studies with comparison,  
34 impact evaluations, difference-in-difference design based on before and after implementation of  
35 the scheme, pre-post, experimental trials, and quasi-randomized trials were eligible for inclusion.

36 **Data extraction and synthesis:** Data extraction was performed by three reviewers independently.  
37 Due to heterogeneity in population and study design statistical pooling was not  
38 possible, therefore narrative synthesis was performed.

39 **Outcomes:** Utilization of healthcare, willingness-to-pay (WTP), out-of-pocket expenditure  
40 (OOPE) (including outpatient and inpatient), catastrophic health expenditure (CHE), and  
41 impoverishment.

42 **Results:** The impact of PFHI on financial risk protection reports no conclusive evidence to suggest  
43 that the schemes had any impact on financial protection. The impact of PFHIs such as Rashtriya

1  
2  
3 44 Swasthy Bima Yojana, Vajpayee Arogyashree and PMJAY showed increased access and  
4  
5 45 utilization of healthcare services. There is a lack of evidence to conclude on WTP an additional  
6  
7 46 amount to the existing monthly financial contribution.  
8  
9  
10

11 47 **Conclusion:** Different central and state PFHIs increased the utilization of health care services by  
12  
13 48 the beneficiaries but there was no conclusive evidence for reduction in financial risk protection of  
14  
15 49 the beneficiaries.  
16  
17

18  
19 50 **Registration:** Not registered  
20

21  
22 51 **Keywords:** Catastrophic Health Expenditure; Financial protection; India; Out-of-pocket health  
23  
24 52 expenditure; Public funded health insurance; Willingness-to-pay.  
25  
26

### 27 53 **Strengths and Limitations of this study**

- 28  
29  
30 54 1) Inclusion of all kinds of empirical evidence to answer the research question about impact  
31  
32 55 of PFHI schemes in India.  
33  
34 56 2) This is one of the very few reviews that has used a systematic methodology to provide  
35  
36 57 latest evidence on the impact of the newly launched PMJAY scheme in India  
37  
38 58 3) Choice of quality appraisal tool, due to unavailability of other tools for this kind of study,  
39  
40 59 was a limitation.  
41  
42 43 4) Multiple PFHI (state-specific and central) schemes in India (with different benefit  
44  
45 46 packages), and modifications in the schemes due to changes in central/state governments,  
47  
48 49 led to high data heterogeneity.  
50  
51 52 5) Due to heterogeneity in data, we could not provide the pooled estimate via meta-analysis.  
52  
53 54 However, results were explained via a narrative synthesis.  
54  
55  
56 65

## 1. Introduction

India has a complex and mixed healthcare framework with presence of parallel public and private healthcare systems.<sup>1 2</sup> There is a stark difference in government spending on both public and private healthcare.<sup>3</sup> Health policies in India have been guided by the principle of equity with prioritizing the needs of the poor and underprivileged.<sup>4</sup> Out-of-pocket expenditure (OOPE) for health is one of the important factors while addressing the inequities in healthcare, and in India it is an important source of healthcare financing. It is estimated that in India around 71% of the healthcare spending is met by OOPE. This not only is an immediate financial burden to the poor households but also pushes the households into a never-ending poverty trap.<sup>5</sup> Health related OOPE poses a threat to the principle of financial risk protection and adds to the unaffordability and inaccessibility of healthcare for the poor. High OOPE also leads to catastrophic health expenditure (CHE), which is the increase in healthcare payment by a household, beyond the threshold, where the threshold is defined as the household's income or capacity to pay. This is further divided into catastrophe 1 where healthcare OOPE exceeds by 10% of the household's consumption expenditure, and catastrophe 2, if OOPE exceeds to more than 40% of the household's non-food expenditure. The increase in OOPE affects the rural population marginally more than the urban population and the effect of OOPE is more pronounced among the people living below the poverty line (BPL) than those above the poverty line (APL), as BPL people are pushed more into poverty than APL, due to the high OOPE, when measured via the increase in poverty head counts.<sup>5</sup>

Over the years, government of India has rolled out different initiatives to address the healthcare related inequities in India. The public healthcare system was revised and reframed as the National Rural Health Mission (NRHM) in 2005, later restructured as National Health Mission in 2014.<sup>5</sup>

<sup>6</sup> Other initiatives like *Janani Suraksha Yojana* and the public funded health

1  
2  
3 89 insurance (PFHI) schemes such as *Rashtriya Swasthya Beema Yojana* (RSBY) were also  
4  
5 90 introduced to address the health inequalities, improve health outcomes and provide  
6  
7 91 financial risk protection.<sup>6</sup> Many states sponsored health insurance (HI) schemes, viz.  
8  
9 92 the *Vajpayee Arogyashree Scheme* (VAS) by Karnataka, *Comprehensive Health Insurance*  
10  
11 93 *Scheme* (CHIS) by Kerala, and *Chief Minister Health Insurance Scheme* (CMHIS) by Tamil  
12  
13 94 Nadu, have been introduced for ensuring financial protection of the vulnerable population.  
14  
15  
16  
17

18 95 Challenges posed by healthcare inequalities and inequities like OOPE can also be addressed via  
19  
20 96 the Universal Health Coverage (UHC). The UHC, as defined by the World Health  
21  
22 97 Organization (WHO), “means that all people and communities can use the promotive, preventive,  
23  
24 98 curative, rehabilitative and palliative health services they need, of sufficient quality to be effective,  
25  
26 99 while also ensuring that the use of these services does not expose the user to financial hardship”.  
27  
28  
29 100 The UHC aims towards increasing the accessibility and affordability of healthcare for the entire  
30  
31 101 population. The definition of UHC is embodied in its three objectives i.e. equity, quality, and  
32  
33 102 financial protection.<sup>7</sup>  
34  
35  
36  
37

38 103 The twelfth five-year plan of the government of India acknowledges the importance of UHC as it  
39  
40 104 introduces a work plan for achieving UHC for the 1.3 billion population of the country. The agenda  
41  
42 105 for this plan is based on the principle of providing affordable, accessible and good quality  
43  
44 106 healthcare with financial protection to the people of the country.<sup>8</sup> The provision of UHC has been  
45  
46 107 included in the National Health Policy of India (2017). To achieve the UHC, government of India  
47  
48 108 announced the ‘*Ayushman Bharat*’ programme in 2018 with two initiatives i.e. (a) Health and  
49  
50 109 Wellness center, and (b) National health protection scheme- *Pradhan Mantri Jan Arogya*  
51  
52 110 *Yojana* (PMJAY) that is intended to cover around 500 million beneficiaries (from vulnerable  
53  
54  
55  
56  
57  
58  
59  
60

111 families) and is intended to cover up to Indian National Rupees (INR) 500,000 per family, per  
112 year, for secondary and tertiary hospitalization.<sup>9</sup>

113 The addition of PMJAY scheme to the various existing PFHI (central and state) schemes, aim to  
114 increase the UHC, by increasing the affordability and accessibility of good quality healthcare. It is  
115 important to assess whether these schemes (including PMJAY) have been proven to be effective  
116 in improving health outcomes and providing financial protection to the vulnerable population.  
117 Following the principles of UHC, Willingness to Pay (WTP) for a particular HI scheme can also  
118 be used as an indicator to assess the affordability and effectiveness of a scheme in providing good  
119 quality health care. Additionally, data on beneficiaries willing to pay more or contribute more for  
120 a HI scheme (viz. CGHS), indirectly provides information on their satisfaction with the services  
121 provided by the scheme, therefore, making it an indicator to assess effectiveness of the scheme.  
122 The previous systematic review<sup>10</sup> on assessing the effectiveness of PFHI schemes in India was  
123 conducted before complete rolling out of the PMJAY and therefore, did not include findings on  
124 the effectiveness of the scheme (PMJAY). Also, this review<sup>10</sup> did not provide information on the  
125 WTP component of assessing impact of the HI schemes. The present review was therefore,  
126 conducted with an aim to provide information related to effectiveness of the central and state  
127 funded HI schemes (including the PMJAY scheme) via health care utilization, WTP, and financial  
128 risk protection of the beneficiaries. This review was planned to answer the following research  
129 question:

- 130 a) What is the impact of PFHI schemes on access and utilization of healthcare, willingness-  
131 to-pay and financial risk protection in India?

## 132 2. Methods

1  
2  
3 133 This systematic review follows the methodology by Cochrane handbook for systematic review of  
4  
5 134 interventions<sup>11</sup> and the PRISMA checklist was used to report the review.<sup>12</sup>  
6  
7

## 8 9 135 2.1. Criteria for including studies in the review

- 10  
11 136 a. Population: Population group above 18 years of age, enrolled in a PFHI scheme in India.  
12  
13 137 b. Intervention: HI schemes funded by either central or state government, and that covers,  
14  
15 138 range of services such as hospitalization, out-patient charges, medicine costs,  
16  
17 139 treatment procedures etc. Different PFHI schemes in India, for example,  
18  
19 140 RSBY, VAS, CMHIS, and PMJAY were eligible to be included. Private or community-  
20  
21 141 based HIs were not eligible to be included. Mixture of HIs were excluded provided a study  
22  
23 142 carried out sub-group analysis for PFHIs.  
24  
25 143 c. Comparison: comparison group comprises of people who did not receive  
26  
27 144 any PFHI services.  
28  
29 145 d. Outcomes: This review includes the following outcomes; (a) Utilization of healthcare,  
30  
31 146 (b) WTP, (c) Financial risk protection measured in terms of OOPE, CHE and  
32  
33 147 impoverishment.  
34  
35 148 e. Study design: cross-sectional studies with comparison, impact evaluations, difference-in-  
36  
37 149 differences (DID) design based on before and after implementation of the scheme, pre-  
38  
39 150 post design, experimental trials, and quasi-randomized trials were eligible to be included.  
40  
41  
42  
43  
44  
45

## 46 47 151 2.2. Search methods for identification of studies

48  
49 152 Electronic databases such as Medline (via PubMed, Web of Science), SCOPUS, Social Science  
50  
51 153 Research Network and International Initiative for impact evaluation (3ie) repository were  
52  
53 154 searched from their inception until 15 July 2020, however only English publications, published in  
54  
55 155 the last 10 years were considered. References and forward citations of the included studies were  
56  
57



1  
2  
3 156 scanned through for any additional eligible studies. Keywords were identified before the initiation  
4  
5 157 of the search. The initial search was carried out in PubMed (*supplementary file*) and was replicated  
6  
7  
8 158 in other databases. Search was conducted by a designated information scientist.  
9

### 10 11 159 2.3. Data collection 12

13 160 Result of search strategy was imported to Endnote X7 reference manager software. Duplicates  
14  
15 161 were removed and the unique citations were exported to Microsoft Excel spreadsheet for  
16  
17 162 screening.  
18  
19

20  
21 163 *2.3.1. Selection of studies:* Unique citations were subjected to title and abstract screening  
22  
23 164 independently by two reviewers. Eligible abstracts of all the relevant studies as per the inclusion  
24  
25 165 criteria were included for full text screening (by BTV, ER and SSP) and relevant ones from these  
26  
27 166 were included for analysis. Before initiating full text screening, we tried to retrieve the full text  
28  
29 167 articles by contacting authors of the respective articles and the full texts that were not retrieved  
30  
31 168 were excluded. Disagreements were resolved by discussion or by a third reviewer.  
32  
33  
34  
35

36 169 *2.3.2. Data extraction:* Data extraction was done (by ER, BTV, SSP) using a pre-designed data  
37  
38 170 extraction form. Information on variables such as bibliographic details (author names, publication  
39  
40 171 year, journal name); study details (information about the objectives of the study and research  
41  
42 172 question addressed); study setting (name of the state, rural/urban); participant characteristics (age,  
43  
44 173 gender, socio-economic status, occupation); intervention details (name and type of HI, mode of  
45  
46 174 delivery of the HI, incentives given, healthcare services covered, time duration of seeking HI, any  
47  
48 175 additional HIs); comparison details; outcome details (information about changes in accessibility  
49  
50 176 of healthcare, utilization of healthcare services, OOPE, WTP, health outcomes like morbidity and  
51  
52 177 mortality, measurement of the outcomes, method used for measurement, time at which the  
53  
54  
55  
56  
57

1  
2  
3 178 outcome was measured); and study design details (type of study design and analysis) was  
4  
5 179 extracted.  
6  
7

8  
9 180 After pilot testing of the data extraction form, it was revised according to the modifications  
10  
11 181 suggested by the team. Disagreements among the reviewers, during data extraction were resolved  
12  
13 182 by consensus, if still not resolved, third reviewer was approached for resolving the  
14  
15 183 disagreements. Extracted data from all the included studies was cross-checked and independent  
16  
17 184 extraction was done for one third randomly selected studies.  
18  
19  
20

#### 21 185 2.4. Methodological Quality

22  
23 186 The methodological quality of the included studies was assessed using Effective Public Health  
24  
25 187 Practice Project Quality Assessment Tool (EPHPP).<sup>13</sup> This tool assesses methodological quality  
26  
27 188 of the quantitative studies based on questions under the following seven domains i.e., a) selection  
28  
29 189 bias; b) study design; c) confounders; d) blinding; e) data collection method; f) withdrawals and  
30  
31 190 dropouts; g) intervention integrity; h) analysis. Quality assessment using this scale, was performed  
32  
33 191 independently by reviewers in groups of two. After discussion, global rating for the scale was  
34  
35 192 followed and studies were marked as 1) methodologically strong, if none of the domains had any  
36  
37 193 weak rating; 2) moderate, if at least one domain was marked as weak; and 3) weak, if two or more  
38  
39 194 domains were marked as weak. Quality assessment was performed using Microsoft excel  
40  
41 195 spreadsheet.  
42  
43  
44  
45  
46

#### 47 196 2.5. Data analysis

48  
49 197 Due to heterogeneity in data, narrative synthesis was performed to answer the research question.  
50  
51 198 The results are summarized based on outcomes and types of PFHIs. The effect measures of  
52  
53  
54  
55  
56  
57  
58  
59  
60

199 included studies such as mean difference or correlation coefficients with appropriate confidence  
200 interval and/or p values are reported.

## 201 2.6. Public-Patient involvement

202 We did not involve public or patient during the process of this review.

## 203 3. Results

204 The literature search on electronic databases generated 555 citation yield, out of which 179 were  
205 duplicates. Additionally, 17 records were identified from forward and backward reference  
206 checking. After title and abstract screening of 393 citations, 157 were included for full text  
207 screening, of which finally 25 articles were included for data synthesis. Schematic representation  
208 of the selection process is shown in figure 1.

### 209 3.1. Characteristics of included studies

210 The summary of study characteristics is given in table 1 and the detailed characteristics of included  
211 studies is given in *the supplementary file*.

### 212 3.2. Impact of PFHI on financial risk protection, utilization of healthcare and WTP

213 This systematic review provides evidence on the impact of different PFHI schemes that have been  
214 operational in India. These schemes are funded by the central government viz. RSBY, CGHS,  
215 ESIS, Swavlamban, Nirmaya-Disability Health Insurance Scheme and PMJAY; and by the state  
216 governments like VAS (Karnataka), RAS (Andhra Pradesh), and CHIS (Tamil Nadu). The  
217 eligibility criteria and benefits offered under each scheme varies according to different state  
218 governments. More information on these PFHI schemes is given in table 2.

219 Summary of the impact findings of RSBY and other PFHIs is given in table 3 & 4, respectively  
220 and the detailed synthesis is provided in *supplementary file*.

1  
2  
3 221 3.2.1. Financial risk protection:  
4

5 222 Twenty-one studies measured financial risk protection, of which 17 were of strong methodological  
6  
7 223 quality,<sup>14-30</sup> three of moderate methodological quality<sup>31-33</sup> and one weak methodological quality.<sup>34</sup>  
8  
9 224 Nine studies<sup>14 16 18 19 23 25 30 32 34</sup> reported the impact of RSBY alone on financial  
10  
11 225 protection. Thirteen studies<sup>15 17 20-22 24 26-29 31-33</sup> provided information on the effect of different PFHI  
12  
13 226 schemes (including state insurance schemes) on financial risk protection.  
14  
15  
16

17  
18 227 Three high methodological quality studies reported a reduction in in-patient OOPE for RSBY  
19  
20 228 households<sup>14 18 30</sup>, however the findings were not significant. One low methodological study stated  
21  
22 229 that after implementation of RSBY in Maharashtra state, there was a significant increase in in-  
23  
24 230 patient expenditure for both public and private healthcare<sup>32</sup>. RSBY did not have a significant effect  
25  
26 231 on in-patient OOPE as a share of total health expenditure, this was reported by two good  
27  
28 232 methodological studies<sup>16 19</sup>. The findings for the impact of RSBY on outpatient OOPE were mixed  
29  
30 233 as out of five good methodological quality studies, two studies mentioned that RSBY led to a  
31  
32 234 reduction in outpatient OOPE<sup>14 18</sup>, two studies reported that RSBY did not have any impact on the  
33  
34 235 outpatient OOPE<sup>16 30</sup> and one study reported that the probability of incurring increased after  
35  
36 236 implementation of RSBY<sup>19</sup>. It was reported that the RSBY households were less likely to incur  
37  
38 237 CHE for outpatient care, in-patient care and overall CHE<sup>14 16 19</sup>, however one high methodological  
39  
40 238 quality study reported that there was no impact of RSBY on CHE<sup>25</sup>. All these findings were non-  
41  
42 239 significant. The effect of RSBY on impoverishment was not clear as one study reported that RSBY  
43  
44 240 had no effect on impoverishment<sup>16</sup>, whereas another study reported an increase in impoverishment  
45  
46 241 among the APY households<sup>25</sup>.  
47  
48  
49  
50  
51  
52

53 242 For other PFHI schemes, the findings for effect of HI schemes on financial risk protection were  
54  
55 243 mixed. Three studies reported a reduction in OOPE for insured households<sup>20 21 26</sup>, whereas another  
56  
57  
58  
59  
60

1  
2  
3 244 study reported no effect on OOPE<sup>24</sup>. For households insured under VAS and RAS, no effect of  
4  
5 245 these schemes was seen on OOPE<sup>17</sup>. One study reported a reduction in in-patient drug expenditure  
6  
7 246 for RAS households<sup>15</sup>, however, other studies reported an increase in in-patient household  
8  
9 247 expenditure<sup>27 32</sup>. For CHIS in Tamil Nadu, one study reported no association of CHIS with size of  
10  
11 248 OOPE<sup>17</sup> and another study reported an increase in OOPE in-patient expenditure<sup>33</sup>. It was reported  
12  
13 249 that CHE was reduced for households enrolled under different PFHI schemes<sup>21 28</sup>, however,  
14  
15 250 specifically for VAS, one study reported reduction in CHE<sup>31</sup>, and another study reported no  
16  
17 251 association between CHE and insurance<sup>17</sup>. For CHIS and RAS, no association was reported for  
18  
19 252 CHE and insurance schemes<sup>15 17</sup>. Enrollment in PMJAY did not decrease the OOPE or CHE of the  
20  
21 253 enrolled households<sup>29</sup>.

22  
23  
24  
25  
26  
27 254 Due to mixed evidence reported for the impact of PFHI schemes on different financial risk  
28  
29 255 protection parameters, it is not possible to conclude whether these schemes have proven to be  
30  
31 256 beneficial in reducing financial risk of the beneficiaries. A summary of these findings is given in  
32  
33 257 table 3&4.

### 34 35 36 37 258 3.2.2. Access and utilization of health services:

38  
39 259 Overall, 16 studies assessed the impact of PFHI on access and utilization of health services (table  
40  
41 260 3 & 4). The HI programs were RSBY,<sup>14 16 23 26 27 30 32 35</sup> VAS<sup>36 37</sup> RAS,<sup>17 27 32</sup> CHIS<sup>20 21 24 26 33</sup> and  
42  
43 261 PMJAY.<sup>29</sup> Of the 16 studies, thirteen studies<sup>14 16 17 20 21 23 24 26 27 29 30 36 37</sup> were assessed to be of  
44  
45 262 strong methodological quality, two<sup>32 33</sup> were assessed as of moderate quality and one<sup>35</sup> was rated  
46  
47 263 as weak quality. The analysis that was carried out majorly to look at the impact was logistic  
48  
49 264 regression, profit models and other types. The outcomes that were reported include reporting of  
50  
51 265 illness or morbidity, hospitalization rate, outpatient care and in-patient care utilization, duration  
52  
53 266 of hospitalization and utilization of hospital services. Findings demonstrated increased access,  
54  
55  
56  
57  
58  
59  
60

1  
2  
3 267 utilization of healthcare (both in rural and urban areas) and hospitalization for RSBY<sup>14 16 23 26 27 30</sup>  
4  
5 268 <sup>32 35</sup>. For other PFHI schemes like VAS, RAS and CHIS an increase in utilization of health care  
6  
7 269 and in-patient outpatient services was reported <sup>20 21 24 26 32 33 36 37</sup>. No significant difference in  
8  
9 270 healthcare utilization was reported for PMJAY beneficiaries<sup>29</sup>.

### 13 271 3.2.3. Willingness-to-pay:

15 272 A high methodological study<sup>38</sup> reported WTP for the insurance scheme. A majority (71 per cent)  
16  
17 273 of CGHS beneficiaries considered that their current contribution was low, and were willing to  
18  
19 274 contribute more. Only 28 per cent ECHS beneficiaries were willing to pay an additional monthly  
20  
21 275 financial contribution for better quality healthcare under the schemes. In comparison to  
22  
23 276 higher employment grade beneficiaries, the CGHS beneficiaries from low employment grade were  
24  
25 277 more willing to pay an additional amount to the existing monthly financial contribution.

## 30 278 **4. Discussion**

32  
33 279 This review identified and provided information on the impact of different PFHI schemes  
34  
35 280 (operational in India) on healthcare utilization, WTP and financial risk protection of the  
36  
37 281 beneficiaries. It was observed that although the utilization of healthcare services via in-patient and  
38  
39 282 outpatient visits increased for insured beneficiaries, there was inconclusive evidence on the impact  
40  
41 283 of different PFHI schemes on financial risk protection.

43  
44  
45 284 Our findings report that there is no conclusive evidence to suggest that RSBY reduced the OOPE  
46  
47 285 and CHE or had an impact on financial risk protection. For other PFHIs including the state  
48  
49 286 sponsored PFHIs *viz.* RAS, VAS and CHIS, the findings suggest a mixed impact of these schemes  
50  
51 287 on OOPE, CHE and impoverishment, leading to inconclusive evidence for financial risk  
52  
53 288 protection. Our findings are similar to another systematic review,<sup>10</sup> which reported lack of  
54  
55  
56  
57

289 substantial evidence for reduction in OOPE or improvement in financial risk protection by  
290 PFHI schemes in India.

291 For financial risk protection, varying results from different studies for the same PFHI scheme,  
292 resulted in mixed findings for this outcome. Therefore, it was a challenge to pool evidence together  
293 and conclude on the impact of PFHI schemes on financial risk protection. One of the plausible  
294 reasons for this can be the different study designs and analysis methods used by different studies  
295 to assess the impact of financial risk protection. Also, difference in benefits packages and  
296 implementation of the scheme by various successive governments, might have resulted in these  
297 mixed findings for this outcome.

298 One of the reasons for studies reporting no substantial impact of RSBY on financial risk protection  
299 can be the limited insurance cover e.g., INR 30,000 annually under RSBY. As the utilization of  
300 healthcare and hospitalization under RSBY has increased over the years<sup>10</sup>, it is possible that  
301 beneficiaries would have been hospitalized for hospital services of more than INR 30,000, leading  
302 to additional OOP payment. Hospitalization for services not offered by the RSBY package and  
303 denial of hospitalization by the empaneled hospitals has also led to an increase in OOPE.<sup>39</sup>  
304 Another reason for the negligible impact of RSBY in reducing OOPE, as reported in some of the  
305 studies, can be the operational or functional error of the scheme. An important component of the  
306 scheme are the insurance companies, which are responsible for enrolling  
307 beneficiaries, empaneling hospitals, processing claims and reimbursing money. Delayed  
308 reimbursement from the insurance companies leads to hospitals asking beneficiaries to buy  
309 medicines and other consumables from outside, which results in high OOPE. Additionally, as there  
310 is no incentive for the insurance companies to keep a check on the OOPE payments, hospitals  
311 might charge patients or deny reimbursement of money on trivial grounds, leading to high OOPE<sup>39</sup>.

1  
2  
3 312 Another reasons could be, (which is based on personal experience of authors) to get an appointment  
4  
5 313 for the surgery in empenelled hospitals, beneficiaries of the PFHIs usually wait for a longer period  
6  
7 314 of time. Therefore, to avoid the delay in treatment, beneficiaries have to resort to OOP.  
8  
9

10 315 The impact of PFHIs (other than RSBY) including the state sponsored schemes was reported to be  
11  
12 316 mixed and inconclusive, similar to another systematic review that reported lack of substantial  
13  
14 317 evidence of impact on OOPE for PFHI operational in low- and middle-income countries  
15  
16 318 (LMICs).<sup>40</sup> Additionally, as the functioning of any PFHI scheme depends on the governance,  
17  
18 319 different governance structures and demographic profiles of the states would have led to  
19  
20 320 heterogeneity in results. Poor impact of different PFHIs on financial risk protection (reported in  
21  
22 321 some of the studies) can be attributed to similar factors that affect RSBY i.e., low coverage or  
23  
24 322 benefits offered by the schemes leading to OOPE and CHE even for insured beneficiaries and  
25  
26 323 interference or reimbursement issues due to functioning of insurance companies or 'trusts'.  
27  
28  
29  
30

31  
32 324 This systematic review is the first one that has focused on the impact of PMJAY. Our findings  
33  
34 325 suggest that there is a lack of evidence related to the impact of PMJAY, as only one study  
35  
36 326 reported the poor impact of PMJAY on reduction in OOPE and financial risk protection. The  
37  
38 327 reasons for poor impact can be similar as experienced by the earlier PFHIs schemes i.e., problem  
39  
40 328 of 'double billing', private providers monopoly and administrative problems. As PMJAY is a  
41  
42 329 relatively new scheme, more evidence is needed to conclude on its impact. Additionally, as the  
43  
44 330 only study included in the review was specifically for the state of Chhattisgarh, availability of  
45  
46 331 evidence from other states is needed to summarize the impact of this scheme.  
47  
48  
49  
50

51 332 According to our review, there was an increase in incidence of outpatient and in-patient visits and  
52  
53 333 the utilization of medical services, however, the healthcare utilization rate differed between  
54  
55 334 states. The utilization rate increased both among rural and urban areas for the RSBY  
56  
57  
58  
59  
60



1  
2  
3 335 and VAS. However, there was one study that assessed healthcare utilization for PMJAY, and the  
4  
5 336 results reported no significant increase in utilization of health care by the PMJAY enrollees. One  
6  
7 337 plausible reason for these results could be the lack of awareness regarding PMJAY, as it is a  
8  
9 338 relatively new scheme. It is not justified to conclude based on a single study and at the same time  
10  
11 339 it is important to look into various other aspects, due to which the results of the PMJAY are  
12  
13 340 insignificant in increasing healthcare utilization. The healthcare utilization rate was assessed in  
14  
15 341 terms of reporting morbidity, hospitalization, utilization of inpatient and outpatient services.  
16  
17  
18  
19

20 342 Overall, majority of the evidence suggests that implementation of PFHI has increased  
21  
22 343 hospitalization and the utilization of outpatient care. Our findings are consistent with  
23  
24 344 other systematic reviews<sup>10 40</sup> i.e., PFHIs had a positive influence on utilization of healthcare and  
25  
26 345 hospitalization in India and other LMICs. Although there is substantial evidence on the impact  
27  
28 346 of PFHI on healthcare utilization, more rigorous evaluation studies are required to evaluate the  
29  
30 347 impact of health insurance schemes and especially the newly launched PMJAY.  
31  
32  
33

34 348 It was reported that although the participants were willing to pay more, the findings for WTP are  
35  
36 349 inconclusive, because the evidence is generated from a single study and the focus of the insurance  
37  
38 350 was limited.  
39  
40  
41

#### 42 351 *Strengths and limitations:*

43  
44 352 Our review is the first comprehensive review, which has summarized the impact of PFHI schemes  
45  
46 353 in India (including the new scheme of PMJAY under the Ayushman Bharat) on utilization of  
47  
48 354 healthcare and financial risk protection. One of the limitations of the review is the choice of quality  
49  
50 355 assessment tool used for critical appraisal of included studies due to absence of any other valid  
51  
52 356 tool for secondary data analysis. Responses to some of the questions and individual domain ratings  
53  
54 357 for the EPHPP tool were subjective, although, before finalizing the rating, we had a substantial  
55  
56  
57  
58  
59  
60

1  
2  
3 358 discussion on every domain rating score. Additionally, the tool is used to assess quality of all the  
4  
5 359 quantitative studies, which makes it very vague. Also, due to heterogeneity in methods, population  
6  
7 360 and types of insurances, we could not perform meta-analysis.  
8  
9

10  
11 361 *Implications of practice and research:*  
12

13 362 Our systematic review has vast policy and practice implications. Since UHC is one of  
14  
15 363 the important components to achieve the sustainable development goals, the role of  
16  
17 364 PFHI becomes even more important in providing equitable and affordable healthcare access  
18  
19 365 to everyone. Financial risk protection is one of the key components of any PFHI scheme that  
20  
21 366 ensures affordable healthcare for everyone. Poor impact of PFHIs on financial risk protection  
22  
23 367 also indicates failure of the PFHI schemes. More research on PFHIs especially PMJAY and its  
24  
25 368 effect on financial risk protection and healthcare utilization is needed as this scheme is an  
26  
27 369 important component of the Ayushman Bharat scheme under the UHC. Similarly, future studies  
28  
29 370 can consider studying the effect of some of the state funded insurances such as  
30  
31 371 by the government of Goa and West Bengal, which also includes APL households, for  
32  
33 372 which currently there is no evidence.  
34  
35  
36  
37  
38

39 373 State and central governments could consider including APL households especially middle-  
40  
41 374 income group under the purview of PMJAY. There should be mechanisms to check corruption in  
42  
43 375 the process of PFHI enrolment and focus could be provided to ease out the administrative  
44  
45 376 difficulties faced by people at the time of claiming insurance. Future research in form of  
46  
47 377 rigorous qualitative research, formative evaluations and process evaluations, should be directed  
48  
49 378 towards the reasons for the failure of different PFHIs in improving financial risk protection of the  
50  
51 379 beneficiaries and demand- and supply-side barriers to implementation and uptake  
52  
53 380 of PFHI. Research reporting reasons for failure of the PFHIs, in improving financial  
54  
55  
56  
57

381 protection, will help in revising and modifying the functioning and implementation of the PFHI  
382 schemes for benefit of the consumers.

## 383 5. Conclusion

384 PFHI schemes *viz.* RSBY, VAS, RAS, and CHIS have been operational in India since 2008. These  
385 schemes have been impactful in increasing healthcare utilization in terms of outpatient and in-  
386 patient care in both rural and urban areas. However, evidence related to financial risk protection  
387 was mixed and inconclusive. The new scheme of Pradhan Mantri Jan Arogya Yojana or PMJAY  
388 has incorporated administrative and strategic changes, which were based on the shortcomings of  
389 earlier PFHIs *viz.* provision of a 24-hours inquiry helpline and increased coverage of healthcare  
390 services and benefit package. However, limited evidence available on the impact of PMJAY  
391 suggests no improvement in healthcare utilization and financial risk protection of the  
392 beneficiaries. Future research on the impact of PMJAY and reasons for failure of other PFHIs on  
393 financial risk protection need to be explored.

## 394 List of Abbreviations:

395 APL: Above poverty line; ATT: Average Treatment of Treated; BPL: Below poverty line; CBHI:  
396 Community Based Health Insurance; CGHS: Central Government Health Scheme; CHE:  
397 Catastrophic Health Expenditure; CHIS: Comprehensive Health Insurance Scheme; CI:  
398 Confidence Interval; CMHIS: Chief Minister Health Insurance Scheme; DID: Difference-in-  
399 Differences; ECHS: Ex-servicemen Contributory Health Scheme; ESIS: Employee State  
400 Insurance Scheme; HI: Health Insurance; IV: Instrumental Variable; LMICs: Low- and middle-  
401 income countries; MD: Mean Difference; NRHM: National Rural Health Mission; NSSO:  
402 National Sample Survey Office; OLS: Ordinary Least Square; OOP: Out-of-pocket; OOPE: Out-  
403 of-pocket health expenditure; OR: Odds Ratio; PFHI: Public Funded Health Insurance; PMJAY:

1  
2  
3 404 Pradhan Mantri Jan Arogya Yojana; PSM: Propensity Score Matching; RAS: Rajiv Arogya Shree;  
4  
5 405 RSBY: Rashtriya Swasthya Beema Yojana; SMD: Standard Mean Difference; UHC: Universal  
6  
7 406 Health Coverage; UP: Uttar Pradesh; VAS: Vajpayee Arogyashree Scheme; WHO: World  
8  
9 407 Health Organization  
10  
11  
12

13 408 **Funding:** This research received no specific grant from any funding agency in the public,  
14  
15 409 commercial or not-for-profit sectors.  
16  
17

18 410 **Acknowledgement:** We acknowledge PHRI-RESEARCH grant by Public Health Foundation of  
19  
20 411 India, with the financial support of Department of Science and Technology to partially support  
21  
22 412 authors to carry out this research. We would like to acknowledge the technical support provided  
23  
24 413 by Public Health Evidence South Asia (PHESA), Prasanna School of Public Health (PSPH),  
25  
26 414 Manipal Academy of Higher Education (MAHE), Manipal. We would like to thank Dr. Jisha B  
27  
28 415 Krishnan, Research Assistant, PHESA, PSPH, MAHE, Manipal for supporting us in the  
29  
30 416 title/abstract screening and quality assessment of the included studies and Dr. Vijay Shree Dhyani,  
31  
32 417 Research Assistant, PHESA, PSPH, MAHE, Manipal, for supporting us in title abstract  
33  
34 418 screening.  
35  
36  
37  
38  
39

40 419 **Conflict of interest:** None declared.  
41  
42

43 420 **Ethical approval:** Not applicable as the current research is a systematic review.  
44  
45  
46

47 421 **Data sharing statement:** The datasets used and/or analysed during the current study are available  
48  
49 422 from the corresponding author on request.  
50  
51

52 423 **Author contribution:** RB is the guarantor of the review. BTV, ER, RB and SSP conceptualized  
53  
54 424 the topic. RV developed search strategy and conducted the search. SSP carried out title/abstract  
55  
56  
57

1  
2  
3 425 screening and BTV, ER, SSP carried out full text screening. BTV, ER and SSP extracted first  
4  
5 426 round of data extraction, analyzed and synthesized the data for the review. Extracted data from all  
6  
7 427 the included studies was cross-checked and independent extraction was done for one third  
8  
9 428 randomly selected studies by BTV, ER, SSP. Quality assessment was performed by BTV, ER,  
10  
11 429 SSP. BTV, ER, SSP drafted the first version of report, which was further edited by RB, BTV, ER,  
12  
13 430 RV, BU and SSP. All the authors read, provided feedback and approved the final report.  
14  
15  
16  
17

### 18 431 **Information about supplementary files**

19  
20 432 **Supplementary file:** This file gives information about the 1) search strategy used for searching  
21  
22 433 for primary studies included in the systematic review, 2) table of characteristics of included  
23  
24 434 studies and 3) detailed synthesis of the results (PDF)  
25  
26

27 435 **Research checklist:** PRISMA checklist (Microsoft word or doc.). This file consists of  
28  
29 436 information about the research based on PRISMA checklist 2009  
30  
31

### 32 437 **References:**

- 33  
34  
35 438 1. Chokshi M, Patil B, Khanna R, et al. Health systems in India. *Journal of Perinatology*  
36  
37 439 2016;36(3):S9-S12. doi: 10.1038/jp.2016.184  
38  
39 440 2. Rao NV, Downey L, Jain N, et al. Priority-setting, the Indian way. *J Glob Health*  
40  
41 441 2018;8(2):020311-11. doi: 10.7189/jogh.08.020311  
42  
43 442 3. Sengupta A, Nundy S. The private health sector in India. *BMJ* 2005;331(7526):1157-58. doi:  
44  
45 443 10.1136/bmj.331.7526.1157  
46  
47 444 4. Balarajan Y, Selvaraj S, Subramanian SV. Health care and equity in India. *The Lancet*  
48  
49 445 2011;377(9764):505-15. doi: [https://doi.org/10.1016/S0140-6736\(10\)61894-6](https://doi.org/10.1016/S0140-6736(10)61894-6)  
50  
51 446 5. Hooda SK. Out-of-pocket Payments for Healthcare in India: Who Have Affected the Most and  
52  
53 447 Why? *Journal of Health Management* 2017;19(1):1-15. doi: 10.1177/0972063416682535  
54  
55  
56  
57  
58  
59  
60

- 1  
2  
3 448 6. Zodpey S, Farooqui H. Universal health coverage in India: Progress achieved &#38; the way  
4  
5 449 forward. *Indian Journal of Medical Research* 2018;147(4):327-29. doi:  
6  
7 450 10.4103/ijmr.IJMR\_616\_18  
8  
9  
10 451 7. Universal Health Coverage Geneva: The World Health Organization; 2020 [cited 2020.  
11  
12 452 Available from: [http://www.who.int/health\\_financing/universal\\_coverage\\_definition/en/](http://www.who.int/health_financing/universal_coverage_definition/en/)  
13  
14 453 accessed June 23 2020.  
15  
16  
17 454 8. Twelfth Five Year Plan (2012–2017). New Delhi, India: Planning Commission, Government of  
18  
19 455 India, 2013.  
20  
21  
22 456 9. Ayushman Bharat for a new India -2022, announced: Press Information Bureau Government of  
23  
24 457 India Ministry of Finance, 2018.  
25  
26 458 10. Prinja S, Chauhan AS, Karan A, et al. Impact of Publicly Financed Health Insurance Schemes  
27  
28 459 on Healthcare Utilization and Financial Risk Protection in India: A Systematic Review.  
29  
30 460 *PLOS ONE* 2017;12(2):e0170996. doi: 10.1371/journal.pone.0170996  
31  
32  
33 461 11. Cochrane Handbook for Systematic Reviews of Interventions version 6.1 (updated September  
34  
35 462 2020). In: Higgins JPT TJ, Chandler J, Cumpston M, Li T, Page MJ, Welch VA ed.:  
36  
37 463 Cochrane, 2020.  
38  
39  
40 464 12. Moher D, Liberati A, Tetzlaff J, et al. Preferred reporting items for systematic reviews and  
41  
42 465 meta-analyses: the PRISMA statement. *BMJ* 2009;339:b2535. doi: 10.1136/bmj.b2535  
43  
44  
45 466 13. Effective Public Health Practice Project- Quality Assessment tool for Quantitative Studies  
46  
47 467 Ontario: MacMaster University; [Available from: <https://merst.ca/ephpp/2020>.  
48  
49 468 14. Azam M. Does Social Health Insurance Reduce Financial Burden? Panel Data Evidence from  
50  
51 469 India. *World Development* 2018;102:1-17. doi:  
52  
53 470 <https://doi.org/10.1016/j.worlddev.2017.09.007>  
54  
55  
56  
57  
58  
59  
60

- 1  
2  
3 471 15. Fan VY, Karan A, Mahal A. State health insurance and out-of-pocket health expenditures in  
4  
5 472 Andhra Pradesh, India. *International journal of health care finance and economics*  
6  
7 473 2012;12(3):189-215. doi: 10.1007/s10754-012-9110-5 [published Online First:  
8  
9 474 2012/07/07]
- 11  
12 475 16. Ghosh S, and, Gupta ND. Targeting and effects of Rashtriya Swasthya Bima Yojana on access  
13  
14 476 to care and financial protection. *Economic and political weekly* 2017;52(4):61-70.
- 16  
17 477 17. Garg S, Chowdhury S, Sundararaman T. Utilisation and financial protection for hospital care  
18  
19 478 under publicly funded health insurance in three states in Southern India. *BMC Health*  
20  
21 479 *Services Research* 2019;19(1):1004. doi: 10.1186/s12913-019-4849-8
- 23  
24 480 18. Johnson D, Krishnaswamy K. The impact of RSBY on hospital utilization and out-of-pocket  
25  
26 481 health expenditure. Washington, DC: World Bank, 2012.
- 28  
29 482 19. Karan A, Yip W, Mahal A. Extending health insurance to the poor in India: An impact  
30  
31 483 evaluation of Rashtriya Swasthya Bima Yojana on out of pocket spending for healthcare.  
32  
33 484 *Social Science & Medicine* 2017;181:83-92. doi:  
34  
35 485 <https://doi.org/10.1016/j.socscimed.2017.03.053>
- 37  
38 486 20. Mahapatro SR, Singh P, Singh Y. How effective health insurance schemes are in tackling  
39  
40 487 economic burden of healthcare in India. *Clinical Epidemiology and Global Health*  
41  
42 488 2018;6(2):75-82. doi: <https://doi.org/10.1016/j.cegh.2017.04.002>
- 44  
45 489 21. Ranjan A, Dixit P, Mukhopadhyay I, et al. Effectiveness of government strategies for financial  
46  
47 490 protection against costs of hospitalization Care in India. *BMC Public Health*  
48  
49 491 2018;18(1):501. doi: 10.1186/s12889-018-5431-8
- 51  
52 492 22. Ravi S, Bergkvist S. Are Publicly Financed Health Insurance Schemes Working in India? *India*  
53  
54 493 *Policy Forum, National Council of Applied Economic Research* 2015;11(1):158-92.



- 1  
2  
3 494 23. Raza W, van de Poel E, Panda P. Analyses of enrolment, dropout and effectiveness of RSBY  
4  
5 495 in northern rural India. MPRA Paper 70081. Germany: University Library of Munich,  
6  
7 496 2016.  
8  
9  
10 497 24. Sriram S, Khan MM. Effect of health insurance program for the poor on out-of-pocket inpatient  
11  
12 498 care cost in India: evidence from a nationally representative cross-sectional survey. *BMC*  
13  
14 499 *Health Services Research* 2020;20(1):839. doi: 10.1186/s12913-020-05692-7  
15  
16  
17 500 25. Sinha RK. Impact of Publicly Financed Health Insurance Scheme (Rashtriya Swasthya Bima  
18  
19 501 Yojana) from Equity and Efficiency Perspectives. *Vikalpa* 2018;43(4):191-206. doi:  
20  
21 502 10.1177/0256090918804390  
22  
23  
24 503 26. Nandi S, Schneider H, Dixit P. Hospital utilization and out of pocket expenditure in public and  
25  
26 504 private sectors under the universal government health insurance scheme in Chhattisgarh  
27  
28 505 State, India: Lessons for universal health coverage. *PLOS ONE* 2017;12(11):e0187904.  
29  
30 506 doi: 10.1371/journal.pone.0187904  
31  
32  
33 507 27. Rao M, Katyal A, Singh PV, et al. Changes in addressing inequalities in access to hospital care  
34  
35 508 in Andhra Pradesh and Maharashtra states of India: a difference-in-differences study using  
36  
37 509 repeated cross-sectional surveys. *BMJ Open* 2014;4(6):e004471. doi: 10.1136/bmjopen-  
38  
39 510 2013-004471  
40  
41  
42 511 28. Selvaraj S, Karan AK. Why Publicly-Financed Health Insurance Schemes Are Ineffective in  
43  
44 512 Providing Financial Risk Protection. *Economic and Political Weekly* 2012;47(11):60-68.  
45  
46  
47 513 29. Garg S, Bebarta KK, Tripathi N. Performance of India's national publicly funded health  
48  
49 514 insurance scheme, Pradhan Mantri Jan Arogya Yojana (PMJAY), in improving access  
50  
51 515 and financial protection for hospital care: findings from household surveys in Chhattisgarh  
52  
53 516 state. *BMC Public Health* 2020;20(1):949. doi: 10.1186/s12889-020-09107-4  
54  
55  
56  
57  
58  
59  
60



- 1  
2  
3 517 30. Sabharwal NS, Mishra, V. K., Naik, A. K., Holmes, R., & Hagen-Zanker, J. How does social  
4  
5 518 protection contribute to social inclusion in India? Evidence from the National Health  
6  
7 519 Insurance Programme (RSBY) in Maharashtra and Uttar Pradesh: Overseas Development  
8  
9 520 Institute, 2014.  
10  
11  
12 521 31. Barnes K, Mukherji A, Mullen P, et al. Financial risk protection from social health insurance.  
13  
14 522 *Journal of Health Economics* 2017;55:14-29. doi:  
15  
16 523 <https://doi.org/10.1016/j.jhealeco.2017.06.002>  
17  
18 524 32. Katyal A, Singh PV, Bergkvist S, et al. Private sector participation in delivering tertiary health  
19  
20 525 care: a dichotomy of access and affordability across two Indian states. *Health policy and*  
21  
22 526 *planning* 2015;30 Suppl 1(Suppl 1):i23-31. doi: 10.1093/heapol/czu061 [published Online  
23  
24 527 First: 2015/03/12]  
25  
26  
27 528 33. Philip NE, Kannan S, Sarma SP. Utilization of Comprehensive Health Insurance Scheme,  
28  
29 529 Kerala: A Comparative Study of Insured and Uninsured Below-Poverty-Line Households.  
30  
31 530 *Asia-Pacific journal of public health* 2016;28(1 Suppl):77s-85s. doi:  
32  
33 531 10.1177/1010539515602306 [published Online First: 2015/09/01]  
34  
35  
36 532 34. Khetrapal S, Acharya A. Expanding healthcare coverage: An experience from <i>Rashtriya  
37  
38 533 Swasthya Bima Yojna</i>. *Indian Journal of Medical Research* 2019;149(3):369-75. doi:  
39  
40 534 10.4103/ijmr.IJMR\_1419\_18  
41  
42  
43 535 35. Dror DM, Vellakkal S. Is RSBY India's platform to implementing universal hospital insurance?  
44  
45 536 *The Indian journal of medical research* 2012;135(1):56-63. doi: 10.4103/0971-5916.93425  
46  
47 537 [published Online First: 2012/03/03]  
48  
49  
50 538 36. Sood N, Bendavid E, Mukherji A, et al. Government health insurance for people below poverty  
51  
52 539 line in India: quasi-experimental evaluation of insurance and health outcomes. *BMJ* :  
53  
54 540 *British Medical Journal* 2014;349:g5114. doi: 10.1136/bmj.g5114  
55  
56  
57  
58  
59  
60

- 1  
2  
3 541 37. Sood N, Wagner Z. Impact of health insurance for tertiary care on postoperative outcomes and  
4  
5 542 seeking care for symptoms: quasi-experimental evidence from Karnataka, India. *BMJ*  
6  
7 543 *Open* 2016;6(1):e010512. doi: 10.1136/bmjopen-2015-010512  
8  
9  
10 544 38. Vellakkal S, Juyal Sa, Mehdi A. Healthcare Delivery and Stakeholder's Satisfaction Under  
11  
12 545 Social Health Insurance Schemes in India: An Evaluation of Central Government Health  
13  
14 546 Scheme (CGHS) and Exservicemen Contributory Health Scheme (ECHS): SSRN, 2012.  
15  
16  
17 547 39. Devadasan N, Seshadri T, Trivedi M, et al. Promoting universal financial protection: evidence  
18  
19 548 from the Rashtriya Swasthya Bima Yojana (RSBY) in Gujarat, India. *Health research*  
20  
21 549 *policy and systems* 2013;11:29. doi: 10.1186/1478-4505-11-29 [published Online First:  
22  
23 550 2013/08/22]  
24  
25  
26 551 40. Acharya A, Vellakkal S, Taylor F, et al. Impact of national health insurance for the poor and  
27  
28 552 the informal sector in low- and middle-income countries: a systematic review. London:  
29  
30 553 University of London, Institute of Education, Social Science Research Unit., 2012.  
31  
32  
33  
34 554  
35  
36  
37  
38  
39  
40  
41  
42  
43  
44  
45  
46  
47  
48  
49  
50  
51  
52  
53  
54  
55  
56  
57  
58  
59  
60

**Table 1: Summary characteristics of included studies**

| Sl. No. | Study characteristic  | Summary                                                                                                                                                                                                                                                                                                                                                                                                                                                                                                                                                                                                                                                                                                                                                                                                                                                                                                                                                                                                                                                                     |
|---------|-----------------------|-----------------------------------------------------------------------------------------------------------------------------------------------------------------------------------------------------------------------------------------------------------------------------------------------------------------------------------------------------------------------------------------------------------------------------------------------------------------------------------------------------------------------------------------------------------------------------------------------------------------------------------------------------------------------------------------------------------------------------------------------------------------------------------------------------------------------------------------------------------------------------------------------------------------------------------------------------------------------------------------------------------------------------------------------------------------------------|
| 1.      | Geographical location | Out of the 25 included studies, 10 studies were conducted nationally, <sup>14 16 18-22 24 28 35</sup> and one was conducted in twelve cities - Bhubaneswar, Thiruvananthapuram, Ahmedabad, Chandigarh, Meerut, Patna, Jabalpur, Lucknow, Hyderabad, Kolkata, Mumbai and Delhi. <sup>38</sup> Other studies were conducted in different states. Studies covering northern region of India were conducted in Uttar Pradesh (UP), <sup>23 30</sup> Haryana, <sup>34</sup> and Punjab. <sup>34</sup> Studies covering southern region of India were undertaken in Karnataka, <sup>17 31 36 37</sup> Andhra Pradesh, <sup>15 17 27 32</sup> , Kerala <sup>33</sup> and Tamil Nadu. <sup>17</sup> Remaining studies were carried out in eastern region <i>viz.</i> Jharkhand, <sup>25</sup> Bihar, <sup>23</sup> Chhattisgarh, <sup>26 29</sup> and western region <i>viz.</i> Maharashtra. <sup>27 30 32</sup>                                                                                                                                                                   |
| 2.      | Population            | Population among the included studies differed in characteristics. General population were included in nine studies. <sup>14-16 20 25-27 29 31</sup> Around seven studies comprised of below poverty line (BPL) households. <sup>17-19 22 24 33 35</sup> A mixed population from rural and urban households were considered in three studies. <sup>21 28 32</sup> One study comprised of patients selected from RSBY empaneled hospitals and key stakeholders. <sup>34</sup> One study included Self-help group (SHG) members or head of the households. <sup>23</sup> One study comprised of socially excluded households focusing on Scheduled Castes (SC), Muslims and upper caste poor. <sup>30</sup> Two studies comprised of a mix population of BPL and above poverty line (APL) households. <sup>36 37</sup> One study comprised of Central Government Health Scheme (CGHS) and Ex-servicemen Contributory Health Scheme (ECHS) principal beneficiaries, empaneled private healthcare providers and officials of the schemes across 12 Indian cities. <sup>38</sup> |

|    |                        |                                                                                                                                                                                                                                                                                                                                                                                                                                                                                                                                                                                                                                                                                                                                                                                                                                                                                                                                                                                                                                                                                                                                 |
|----|------------------------|---------------------------------------------------------------------------------------------------------------------------------------------------------------------------------------------------------------------------------------------------------------------------------------------------------------------------------------------------------------------------------------------------------------------------------------------------------------------------------------------------------------------------------------------------------------------------------------------------------------------------------------------------------------------------------------------------------------------------------------------------------------------------------------------------------------------------------------------------------------------------------------------------------------------------------------------------------------------------------------------------------------------------------------------------------------------------------------------------------------------------------|
| 3. | Type of Insurance      | Central government funded health insurance (HI): About 14 studies were conducted on central government funded HI schemes i.e., RSBY. <sup>14 18 19 22-28 30 32 34 35</sup> One study was conducted on PMJAY. <sup>29</sup> Three studies were conducted on CGHS. <sup>16 24 38</sup> Two studies were conducted on Employee State Insurance Scheme (ESIS). <sup>16 24</sup> State government funded HI: Three studies each were conducted on VAS in Karnataka <sup>31 36 37</sup> and Rajiv Arogya Shree (RAS) in Andhra Pradesh. <sup>15 27 32</sup> One study each reported on CHIS <sup>33</sup> (Philip, Kannan & Sharma, 2016) and ECHS. <sup>38</sup> Any government funded HI: Remaining other studies were generally all PFHI. <sup>17 20-22 24 28</sup>                                                                                                                                                                                                                                                                                                                                                                |
| 4. | Study design           | Impact evaluation including quasi-randomized designs was used in eight studies. <sup>15 16 19 29 30 32 36 37</sup> Observational study design was used in five studies. <sup>23 25 31 33 38</sup> Secondary data analysis was performed in eleven studies. <sup>14 17 18 20-22 24 26-28 35</sup> . Mixed method approach was used in one study. <sup>34</sup>                                                                                                                                                                                                                                                                                                                                                                                                                                                                                                                                                                                                                                                                                                                                                                   |
| 5. | Outcomes               | <p>a. Financial risk protection: The impact of RSBY on financial protection was reported by nine studies.<sup>14 16 18 19 23 25 30 32 34</sup>. The impact of different PFHI schemes (including state insurance schemes) on financial risk protection were reported by thirteen studies.<sup>15 17 20-22 24 26-29 31-33</sup></p> <p>b. Access and utilization of healthcare: The impact of PFHI on healthcare utilization was reported by 16 studies, out of these eight studies assessed the impact of RSBY on healthcare utilization.<sup>14 16 23 26 27 30 32 35</sup> Impact of RAS was assessed by single study.<sup>32</sup> Five studies assessed the impact of CHIS on utilization of healthcare.<sup>20 21 24 26 33</sup> One study evaluated the impact of PMJAY on healthcare utilization.<sup>29</sup> Hospitalization rate was reported in two studies with the implementation of RAS.<sup>17 27</sup> Two studies reported hospital utilization rate with implementation of VAS.<sup>36 37</sup></p> <p>c. Willingness to pay: WTP and reduction of financial burden was reported in one study.<sup>38</sup></p> |
| 6. | Methodological quality | Out of 25 studies, three were of moderate quality <sup>31-33</sup> , two weak methodological quality <sup>34 35</sup> and remaining others were of high quality.                                                                                                                                                                                                                                                                                                                                                                                                                                                                                                                                                                                                                                                                                                                                                                                                                                                                                                                                                                |

**Table 2: Central and state sponsored PFHI schemes in India**

| <b>Central funded health insurance schemes</b>          |                                                                                                                                                                                                                                                                                                                                                                                                                                                                                                                                                                                                                                                                                                                                                                 |
|---------------------------------------------------------|-----------------------------------------------------------------------------------------------------------------------------------------------------------------------------------------------------------------------------------------------------------------------------------------------------------------------------------------------------------------------------------------------------------------------------------------------------------------------------------------------------------------------------------------------------------------------------------------------------------------------------------------------------------------------------------------------------------------------------------------------------------------|
| 1.                                                      | Rashtriya Swasthya Bima Yojana-RSBY (2008) is a central funded health insurance scheme in which 75% of the annual premium is provided by the central government and rest 25% by the state governments. In-patient expenditure of upto INR 30,000 per family per annum is insured for below poverty line families. Unorganized sector is also covered under this scheme.                                                                                                                                                                                                                                                                                                                                                                                         |
| 2.                                                      | Prime Minister’s Jan Arogya Yojana-PMJAY (2018), this is a fully government sponsored scheme, which provides a cover of INR 5,00,000 per family per year in government empanelled public and private hospitals of India, for secondary and tertiary level hospitalization. Vulnerable and BPL families are eligible to avail the services under this scheme                                                                                                                                                                                                                                                                                                                                                                                                     |
| 3.                                                      | Central Government Health Scheme-CGHS (1954), is eligible for central government employees and pensioners enrolled under the scheme. According to this scheme, inpatient services at the government empanelled hospitals, outpatient services including medicines, consultation by experts, maternity and child health services (family welfare), and medical consultation for alternative system of medicines is covered.                                                                                                                                                                                                                                                                                                                                      |
| 4.                                                      | Swavlamban (2015), this is a central funded health insurance scheme for people with disabilities. Eligible population includes BPL and differently-abled people with blindness, hearing impairment, leprosy-cured, locomotor disability, mental illness etc. A sum of INR 200,000 per annum is covered and treatment of pre-existing illness is covered under the scheme.                                                                                                                                                                                                                                                                                                                                                                                       |
| 5.                                                      | Nirmaya-Disability Health Insurance Scheme (2008), this central funded health insurance scheme is specifically for people with Cerebral Palsy, autism, multiple disabilities and mental retardation. Services of upto INR 100,000 are covered under this scheme.                                                                                                                                                                                                                                                                                                                                                                                                                                                                                                |
| 6.                                                      | Employee State insurance Scheme-ESIS (1952), this scheme is funded by the employers and staff contributions and is applicable to employees of factories and establishments drawing wages upto INR 15,000 a month. Under this scheme a number of benefits to protect the employees or workers from illness, disability and death are paid to the beneficiaries. Benefits such as sickness benefit (70% of wages), temporary disablement benefit (90% of last wage), permanent disability benefit (90% of wage), maternity benefit (100% of wage), dependent benefit (90% of wage), INR 10000 to dependents for funeral expenses in case of death of the employees, and other benefits like vocational and physical rehabilitation is given to the beneficiaries. |
| <b>State government funded health insurance schemes</b> |                                                                                                                                                                                                                                                                                                                                                                                                                                                                                                                                                                                                                                                                                                                                                                 |
| 1.                                                      | Aarogyasri Scheme (2007), this scheme is by the Telangana state and BPL families belonging to the state are eligible. Benefits include cashless transactions for treatment of extreme illness, for upto INR200, 000 per year, covered under the scheme.                                                                                                                                                                                                                                                                                                                                                                                                                                                                                                         |
| 2.                                                      | Ayushman Bharat – Mahatma Gandhi Rajasthan Swasthya Bima Yojana-MGRSBY (2019), this scheme is by the government of Rajasthan and is formed by merging PMJAY scheme and Bhamashah Swasthya Bima Yojana. All the Rajasthani families belonging to BPL category are covered under this scheme. Under this scheme an insured amount                                                                                                                                                                                                                                                                                                                                                                                                                                 |

of INR 50,000 and INR 450,000 are provided for secondary and tertiary illness respectively.

3. Chief Minister's Comprehensive Health Insurance Scheme-CHIS (2012), this is state funded HI scheme by government of Tamil Nadu. People belonging to families of less than INR 72,000 is annual earning or less and members of unorganized labour welfare boards, including their families are eligible. Services and benefits of upto INR 500,000 per family per year are covered under the scheme.
4. Deen Dayal Swasthaya Seva Yojana -DDSSY (2016), by Goa government, for residents of Goa (residing for at least five years), central and state government employees already covered under other government health insurance benefits are eligible. Benefits include cashless inpatient services under government empanelled services. Annual coverage of upto INR 250,000 for a family of three and INR 400,000 for a family of four or more is given. Beneficiaries have to provide an annual premium of INR 200-300 to avail the benefits of the scheme.
5. Dr. YSR Aarogyasri Scheme (Formerly called Rajiv Arogyasri Community Health Insurance Scheme)-2007, by the Andhra Pradesh government, this scheme covers BPL families from Andhra Pradesh. Under this scheme free end to end cashless services are provided for patients undergoing treatment for therapies listed by the network hospitals. Free outpatient assessments is done for patients not undergoing treatment under the sited therapies.
6. Vajpayee Arogaya Shree-VAS (2009), this scheme is funded by the government of Karnataka and is applicable for BPL families from rural and urban areas of Karnataka. A total of INR 150,000 is re-imbursed for services provided to 5 members of the beneficiary family, an extra sum of INR 50,000 per annum is provided in case to case basis.
7. West Bengal Health for All Employees and Pensioners Cashless Medical Treatment Scheme (2014), previously known as 'West Bengal Health Scheme', by the government of West Bengal, this scheme is for West Bengal government employees, pensioners and their family members. Benefits include re-imburement for in-patient services in the state empaneled hospitals and outpatient services for fifteen diseases mentioned in the scheme. Cashless medical treatment for upto INR 100,000 is provided for inpatient treatment.
8. Yeshasvini co-operative farmer's health care scheme (2003), by government of Karnataka, this scheme is for farmers who are members of the cooperative societies. According to this scheme, beneficiaries from the rural areas have to contribute INR 250 (for general category) and INR 50 (for SC/ST families) per annum. Beneficiaries from the urban areas have to contribute INR 710 (for general category) and INR 110 (for SC/ST) per annum. Benefits include inpatient services, discount rates for lab investigations, tests, outpatient services and medical emergency services due to mishaps during farming or any other agriculture related work.

**Table 3: Impact of RSBY on financial risk protection and healthcare utilization**

| Outcome                                               | Findings                                                                                                                                                                                                                                                                                                                                                                                                                                                                                                                                                                                                                                                                                                                                                                                                                                                                                                                                                                                                                                                                                                                                                                                                                                                                                                                                                                                                                                                                                                                                                                                                                                                                                                                                                                                                                                                                                                                                                                                                                                                                                                                                                                                                                                                                                                                                                                                                                                                                                                                                                                                                                                                                                                                                                                                                                                                                                                                                                                                                                                                                                                                                                                                                                                                                                                                                                                                                                                                                                                                                                                                                       |
|-------------------------------------------------------|----------------------------------------------------------------------------------------------------------------------------------------------------------------------------------------------------------------------------------------------------------------------------------------------------------------------------------------------------------------------------------------------------------------------------------------------------------------------------------------------------------------------------------------------------------------------------------------------------------------------------------------------------------------------------------------------------------------------------------------------------------------------------------------------------------------------------------------------------------------------------------------------------------------------------------------------------------------------------------------------------------------------------------------------------------------------------------------------------------------------------------------------------------------------------------------------------------------------------------------------------------------------------------------------------------------------------------------------------------------------------------------------------------------------------------------------------------------------------------------------------------------------------------------------------------------------------------------------------------------------------------------------------------------------------------------------------------------------------------------------------------------------------------------------------------------------------------------------------------------------------------------------------------------------------------------------------------------------------------------------------------------------------------------------------------------------------------------------------------------------------------------------------------------------------------------------------------------------------------------------------------------------------------------------------------------------------------------------------------------------------------------------------------------------------------------------------------------------------------------------------------------------------------------------------------------------------------------------------------------------------------------------------------------------------------------------------------------------------------------------------------------------------------------------------------------------------------------------------------------------------------------------------------------------------------------------------------------------------------------------------------------------------------------------------------------------------------------------------------------------------------------------------------------------------------------------------------------------------------------------------------------------------------------------------------------------------------------------------------------------------------------------------------------------------------------------------------------------------------------------------------------------------------------------------------------------------------------------------------------|
| <p><b>Out of Pocket health Expenditure (OOPE)</b></p> | <p><b>a) Inpatient OOPE:</b> RSBY influenced reduction in inpatient OOPE. The evidence is generated from three high methodological studies.<sup>14 18 30</sup> The per-capita inpatient expenditure for RSBY treated households, decreased in both rural and urban areas.<sup>14</sup> The impact of RSBY on inpatient expenditure was reduced for unmatched and matched samples, when RSBY was implemented for a minimum of two months duration. After removing Uttar Pradesh (UP) and Haryana from the analysis, the triple difference findings (i.e. with a second control of non-BPL households) showed a reduction in inpatient expenditure but the double difference analysis showed an increase in inpatient expenditure due to RSBY. However, none of these findings were statistically significant.<sup>18</sup> Both the studies included National Sample Survey Office (NSSO) data from Andhra Pradesh, Karnataka and Tamil Nadu, and used matching and DID methodology for analysis. Sabharwal et al.,<sup>30</sup> used PSM impact analysis to report that average annual household expenditure on inpatient care was significantly less for RSBY beneficiary households when compared with non-beneficiary households. This study also reported that average annual household expenditure spent on inpatient was higher for RSBY beneficiaries who used the smart card for inpatient expenses than the RSBY beneficiaries who did not use the RSBY smart card. However, a low methodological study<sup>32</sup> reported a significant increase in inpatient expenditure for both public and private healthcare, in the state of Maharashtra. This difference was calculated using DID method for the year 2004 and 2012 (after implementation of RSBY in the state). The scheme did not have a significant effect on the OOPE expenditure for inpatient visits.<sup>16 19</sup> A good methodological study<sup>16</sup> applied the coarsened exact matching and linear and logit regression to report the impact of RSBY on OOPE for inpatient visits, among insured households. No statistically significant difference was reported between RSBY insured and uninsured households. Another good methodological study,<sup>19</sup> applied Propensity Score Matching (PSM) and DID approach, to find the impact of RSBY on inpatient OOPE in total household expenditure, by dividing treatment districts into Treatment 1 (TT1) i.e., March 2010 and Treatment 2 (TT2) group i.e., April 2010-March 2012. No impact of RSBY on the inpatient OOPE as share of total household expenditure was observed. The probability of incurring zero OOPE inpatient expenditure was not significantly different for RSBY and non-RSBY families. RSBY increased the probability of incurring inpatient OOPE by 22% (TT1) and 28% (TT2) respectively. However, these findings were not significant.<sup>19</sup></p> <p><b>b) Outpatient OOPE:</b> Five studies<sup>14 16 18 19 30</sup> provided inconclusive information on the effect of RSBY on outpatient OOPE. RSBY had a negative impact on the outpatient expenditure.<sup>14 18</sup> According to Azam,<sup>14</sup> implementation of RSBY reduced the per capita outpatient expenditure for both rural and urban areas. The outpatient expenditure reduced for RSBY households for the overall matched sample and for the matched sample minus UP and Haryana.<sup>18</sup> There was no statistically significant difference between RSBY insured and uninsured households in terms of OOPE on outpatient visits.<sup>16 30</sup> RSBY</p> |



|                                              |                                                                                                                                                                                                                                                                                                                                                                                                                                                                                                                                                                                                                                                                                                                                                                                                                                                                                                                                                                                                                                                                                                                                                                                                                                                                                                                                                                                               |
|----------------------------------------------|-----------------------------------------------------------------------------------------------------------------------------------------------------------------------------------------------------------------------------------------------------------------------------------------------------------------------------------------------------------------------------------------------------------------------------------------------------------------------------------------------------------------------------------------------------------------------------------------------------------------------------------------------------------------------------------------------------------------------------------------------------------------------------------------------------------------------------------------------------------------------------------------------------------------------------------------------------------------------------------------------------------------------------------------------------------------------------------------------------------------------------------------------------------------------------------------------------------------------------------------------------------------------------------------------------------------------------------------------------------------------------------------------|
|                                              | <p>increased the probability of incurring outpatient OOPE for households participating in RSBY before March 2010, by 23%; however, there was no significant effect on the scheme on outpatient OOPE for the RSBY households between April 2010 and March 2012.<sup>19</sup></p> <p><b>c) Total OOPE spending:</b> Four studies provided information on total OOPE spending after RSBY implementation.<sup>14 16 19 23</sup> RSBY resulted in reduction of total OOPE of the households. The findings of these studies were mostly not significant. Two studies used matching and DID for analysis and two used matching and regression.</p>                                                                                                                                                                                                                                                                                                                                                                                                                                                                                                                                                                                                                                                                                                                                                   |
| <b>Catastrophic Health Expenditure (CHE)</b> | <p>Four studies<sup>14 16 19 25</sup> provided information on the effect of RSBY on CHE, the RSBY households were less likely to incur CHE for outpatient care, inpatient care and overall CHE. It was observed that beneficiaries of the scheme reported a reduction in CHE, however, one study<sup>25</sup> reported that there was no effect of RSBY on CHE. According to Azam,<sup>14</sup> the effect was same for both rural and urban households. RSBY increased the likelihood of CHE 25.<sup>14</sup> All these findings about the impact of RSBY on CHE were not significant. However, incidence of CHE was significantly reduced for RSBY households with childbirth in last one year of data collection.<sup>25</sup> Two studies<sup>14 19</sup> performed matching and analyzed using DID analysis, and other studies<sup>16 25</sup> performed matching and linear and logistic regression. The cost of medicines was significantly reduced by 22 INR for RSBY households in the rural areas, however it increased for the urban households by 28 INR, but this result was not significant.<sup>14</sup></p>                                                                                                                                                                                                                                                                   |
| <b>Impoverishment</b>                        | <p>The effect of RSBY on impoverishment was not clear. One study<sup>16</sup> reported that RSBY had no effect on impoverishment due to OOP on inpatient care and on the total overall probability of impoverishment. However, in another study<sup>25</sup> among RSBY enrolled APL households, the incidence of health expenditure induced poverty was significantly increased i.e., APL households were pushed to BPL because of health care expenditure. Both the studies performed matching and used regression analysis, linear and logistic regression.</p>                                                                                                                                                                                                                                                                                                                                                                                                                                                                                                                                                                                                                                                                                                                                                                                                                            |
| <b>Utilization of health care</b>            | <p>Around eight studies<sup>14 16 23 26 27 30 32 35</sup> looked at the impact of RSBY on healthcare utilization. The outcomes assessed by these studies include reporting of illness, hospitalization rate, outpatient care and inpatient care utilization and utilization of hospital services. The impact of RSBY on hospitalization was assessed by six studies,<sup>14 23 26 27 32 35</sup> all the studies showed increase in the hospitalization, of which three studies showed significant increase in hospitalization among female heads, scheduled tribes and for poorest.<sup>27</sup> For women seeking treatment in obstetrics department.<sup>26</sup> The studies<sup>16 30</sup> suggested increase in both, inpatient and outpatient services. However, the results were significant for inpatient care for one of the studies.<sup>16</sup> A study<sup>14</sup> assessed the impact of HI on reporting morbidity and seeking treatment for illness in both rural and urban areas. The ATT analysis suggested increase in reporting of morbidity, seeking treatment for short term and long-term illnesses and long-term morbidity in rural India compared to urban India. The increased value ranges from 0.7% to 3.2%. In urban India, the increase in reporting illness by RSBY holders varied from 2.3%-2.4%, which was not statistically significant.<sup>14</sup></p> |



**Table 4: Impact of other PFHI schemes on financial risk protection and health care utilization**

| Outcome                                               | Findings                                                                                                                                                                                                                                                                                                                                                                                                                                                                                                                                                                                                                                                                                                                                                                                                                                                                                                                                                                                                                                                                                                                                                                                                                                                                                                                                                                                                                                                                                                                                                                                                                                                                                                                                                                                                                                                                                                                                                                                                                                                                                                                                                                                                                                                                                                                                                                                                                                                                                                                                                                                                                                                                                                                                                                                                                                                                                   |
|-------------------------------------------------------|--------------------------------------------------------------------------------------------------------------------------------------------------------------------------------------------------------------------------------------------------------------------------------------------------------------------------------------------------------------------------------------------------------------------------------------------------------------------------------------------------------------------------------------------------------------------------------------------------------------------------------------------------------------------------------------------------------------------------------------------------------------------------------------------------------------------------------------------------------------------------------------------------------------------------------------------------------------------------------------------------------------------------------------------------------------------------------------------------------------------------------------------------------------------------------------------------------------------------------------------------------------------------------------------------------------------------------------------------------------------------------------------------------------------------------------------------------------------------------------------------------------------------------------------------------------------------------------------------------------------------------------------------------------------------------------------------------------------------------------------------------------------------------------------------------------------------------------------------------------------------------------------------------------------------------------------------------------------------------------------------------------------------------------------------------------------------------------------------------------------------------------------------------------------------------------------------------------------------------------------------------------------------------------------------------------------------------------------------------------------------------------------------------------------------------------------------------------------------------------------------------------------------------------------------------------------------------------------------------------------------------------------------------------------------------------------------------------------------------------------------------------------------------------------------------------------------------------------------------------------------------------------|
| <p><b>Out of Pocket health Expenditure (OOPE)</b></p> | <p>The PFHI households were less likely to entail OOPE and there was a significant reduction in OOP for these households.<sup>20 21 26</sup> All the studies used regression analysis, linear and logit model for analysis. However, using Tobit regression it was found that there was no effect of PFHI schemes on OOPE of the households.<sup>24</sup> For VAS, the OOPE was less for the insured households, when compared to uninsured households, however the two-stage least squares (2sls) regression model reported no association between VAS enrolment and size of OOPE.<sup>17</sup> According to Barnes et al.,<sup>31</sup> reduction in OOPE increased with increase in quantiles of spending. At the 75<sup>th</sup> quantile, the significant reduction in OOPE for VAS households was INR 4485 and at 95<sup>th</sup> quantile it was INR 23548.19. There was no association between RAS (Andhra Pradesh- AP) enrolment and size of OOPE, by using 2sls regression model.<sup>17</sup> By using DID, among phase 1 (2007), for Arogyashree enrolled households (AP), significant reduction in per capital monthly OOP inpatient expenditure and inpatient drug expenditure were observed;<sup>15</sup> and an increase in inpatient expenditure for RAS households.<sup>27</sup> For RAS (AP), Katyal et al.,<sup>32</sup> reported a significant increase in both public and private inpatient expenditure, when calculated for the year 2004 and 2012 via DID analysis. Enrolment in CHIS of Tamil Nadu was not significantly associated with size of OOPE.<sup>17</sup> For the CHIS operational in Kerala, the mean OOP expenses for inpatient services among insured participants (INR 448.95) was significantly higher than that of the uninsured households (INR 159.93), using Mann-Whitney U test.<sup>33</sup> There was one study<sup>29</sup> that reported findings on the effect of PMJAY on OOPE and CHE. It was reported that enrolment in PMJAY did not decrease the OOPE or CHE. There was statistically insignificant more reduction in OOPE for PMJAY enrolled households than other PFHI enrolled households. Statistical significant reduction in log of OOPE was marginally more for PMJAY enrolled households than other PFHIs. OLS model was used for calculation of the abovementioned continuous outcome variable. As per the Probit model, there was a significant increase in CHE25 and CHE40 of PMJAY enrolled households. But not for PSM model, wherein reduction in OOPE for PMJAY and other PFHI was significant and CHE10 was not associated with PMJAY and PFHI enrolment according to any of the models. The naïve OLS model showed no association between the size of OOPE and enrolment under PMJAY or any PFHI schemes, these findings did not change under propensity score matching and Instrumental Variable (IV) models.</p> |
| <p><b>Catastrophic Health Expenditure (CHE)</b></p>   | <p>Six studies<sup>15 17 21 22 28 31</sup> reported the effect of PFHI schemes on CHE. The PFHIs led to reduction in CHE, however the effect was very small.<sup>21 28</sup> With PSM, the PFHI enrolled households were 13 % less likely to experience CHE10 and 6% less likely to experience CHE25. For the lowest three quintiles, this effect was even less pronounced as only 0.4% of PFHI households and 1% of PFHI households were likely to experience CHE10 and CHE25.<sup>21</sup> There was a consistent increase in the catastrophic headcount threshold 40% of non-food expenditure for treatment, outpatient, inpatient and drugs.<sup>22</sup> This increase was even reported in a long-term sample i.e. households that have been enrolled in the PFHI schemes for a year. Two studies<sup>22 28</sup> used DID for analysis, whereas another used logistic regression<sup>21</sup> for analysis. The VAS scheme had a limited effect on CHE; there was no association between enrolment in VAS and</p>                                                                                                                                                                                                                                                                                                                                                                                                                                                                                                                                                                                                                                                                                                                                                                                                                                                                                                                                                                                                                                                                                                                                                                                                                                                                                                                                                                                                                                                                                                                                                                                                                                                                                                                                                                                                                                                                   |

|                                   |                                                                                                                                                                                                                                                                                                                                                                                                                                                                                                                                                                                                                                                                                                                                                                                                                                                                                                                                                                                                                                                                                                                                                                                                                                                                                                                                                                                                                                                                                                                                                                                                                                                                                                                                                                                                                                                                                                                                                                                                                                                                                                                                                                                                                                                                                                                                                                                                                                  |
|-----------------------------------|----------------------------------------------------------------------------------------------------------------------------------------------------------------------------------------------------------------------------------------------------------------------------------------------------------------------------------------------------------------------------------------------------------------------------------------------------------------------------------------------------------------------------------------------------------------------------------------------------------------------------------------------------------------------------------------------------------------------------------------------------------------------------------------------------------------------------------------------------------------------------------------------------------------------------------------------------------------------------------------------------------------------------------------------------------------------------------------------------------------------------------------------------------------------------------------------------------------------------------------------------------------------------------------------------------------------------------------------------------------------------------------------------------------------------------------------------------------------------------------------------------------------------------------------------------------------------------------------------------------------------------------------------------------------------------------------------------------------------------------------------------------------------------------------------------------------------------------------------------------------------------------------------------------------------------------------------------------------------------------------------------------------------------------------------------------------------------------------------------------------------------------------------------------------------------------------------------------------------------------------------------------------------------------------------------------------------------------------------------------------------------------------------------------------------------|
|                                   | <p>CHE25, CHE40 and CHE10, using two-step IV Probit model.<sup>17</sup> In another study<sup>31</sup>, the percentage of VAS households borrowing money for health reasons in the past one year was significantly lower than non-VAS households. According to Barnes et al.,<sup>31</sup> there was a marginal reduction in % of CHE (both as % of non-food expenditure and total expenditure) for VAS households than non-VAS households. This finding consists of both non-significant and significant results, however, reduction for 40% and 80% of CHE of the total non-food expenditure and 40% of CHE of the total expenditure was a significant finding. Additionally, money spent by VAS households on CHE was significantly lesser than non-VAS households. For RAS in Andhra Pradesh, there was no association between RAS enrolment and CHE25, CHE40, CHE10, by using two-step IV Probit model.<sup>17</sup> There was no clear effect of Arogyashree enrolment on CHE.<sup>15</sup> Enrolment in CHIS of Tamil Nadu was not significantly associated with CHE25, CHE40 and CHE10.<sup>17</sup></p>                                                                                                                                                                                                                                                                                                                                                                                                                                                                                                                                                                                                                                                                                                                                                                                                                                                                                                                                                                                                                                                                                                                                                                                                                                                                                                                  |
| <b>Impoverishment</b>             | <p>The PFHIs had a marginal effect on the reduction of impoverishment of households.<sup>21 22</sup> For the overall sample, the PFHIs led to marginal reduction in overall impoverishment and OOP impoverishment,<sup>22</sup> for both short term and long-term samples (more than a year). However, in the state fixed effect model for overall impoverishment, it was reported that the PFHI schemes had no effect on impoverishment. The state fixed effect model was used because of the assumption that presence of different state HI schemes alter the findings, and this was analyzed using regression analysis.<sup>22</sup> There was no significant difference seen among Arogyashree enrolled households in AP, compared to south India and all India sample on impoverishment and impoverishment due to OOPE.<sup>15</sup></p>                                                                                                                                                                                                                                                                                                                                                                                                                                                                                                                                                                                                                                                                                                                                                                                                                                                                                                                                                                                                                                                                                                                                                                                                                                                                                                                                                                                                                                                                                                                                                                                    |
| <b>Utilization of health care</b> | <p>Two studies<sup>36 37</sup> exclusively assessed impact of VAS on hospital utilization rate. There was significant increase in utilization of healthcare for all tertiary care facilities. The quasi-randomized study<sup>36</sup> suggested significant increase in healthcare utilization with respect to accessing healthcare for any symptoms with adjusted difference of 4.96%. The increase in rate of hospitalization in primary and tertiary care varied from 4.3% to 12.3%, showing the significant change in healthcare utilization after the implementation of VAS. The quasi-randomized study<sup>37</sup> found significant increase in treatment seeking behavior for symptoms associated with cardiac conditions than for non-cardiac symptoms. Eligible households for VAS were 4.4% more likely to seek treatment than non-eligible households. The RAS was assessed by Katyal et al.<sup>32</sup> The DID analysis suggested increase in healthcare utilization in Andhra Pradesh and hospitalization<sup>27</sup>. The five studies,<sup>20 21 24 26 33</sup> assessed the impact of CHIS and other PFHIs and suggested an increase in inpatient and outpatient services. The matched cross-sectional study<sup>33</sup> suggests significant increase in overall utilization of inpatient services and non-significant results with respect to outpatient services among CHIS insured compared to uninsured. The multivariate analysis<sup>24</sup> showed increased hospitalization, hospitalization for chronic conditions, hospitalization among all age groups for PFHI households. It was also observed via Tobit regression model, being enrolled in PFHI was not significantly associated with length of stay during hospitalization, contradictory to people with chronic illness. Though the association of HI with healthcare utilization was high, inequality in accessing healthcare was higher among the higher economic people. The naive profit model analysis<sup>17</sup> that assessed VAS, RAS and CHIS suggested significant increase in hospitalization in Karnataka after the implementation of VAS. The only study<sup>29</sup> that evaluated PMJAY; the data analysis from NSS data based on PSM and naive models on the hospitalization did not show any significant difference in hospital care utilization among both enrolled and non-enrolled population for insurance.</p> |

1  
2  
3  
4  
5  
6  
7  
8  
9  
10  
11  
12  
13  
14  
15  
16  
17  
18  
19  
20  
21  
22  
23  
24  
25  
26  
27  
28  
29  
30  
31  
32  
33  
34  
35  
36  
37  
38  
39  
40  
41  
42  
43  
44  
45  
46  
47

**Figure Legend:**

Figure 1: PRISMA flow diagram

For peer review only

Figure 1: PRISMA flow diagram

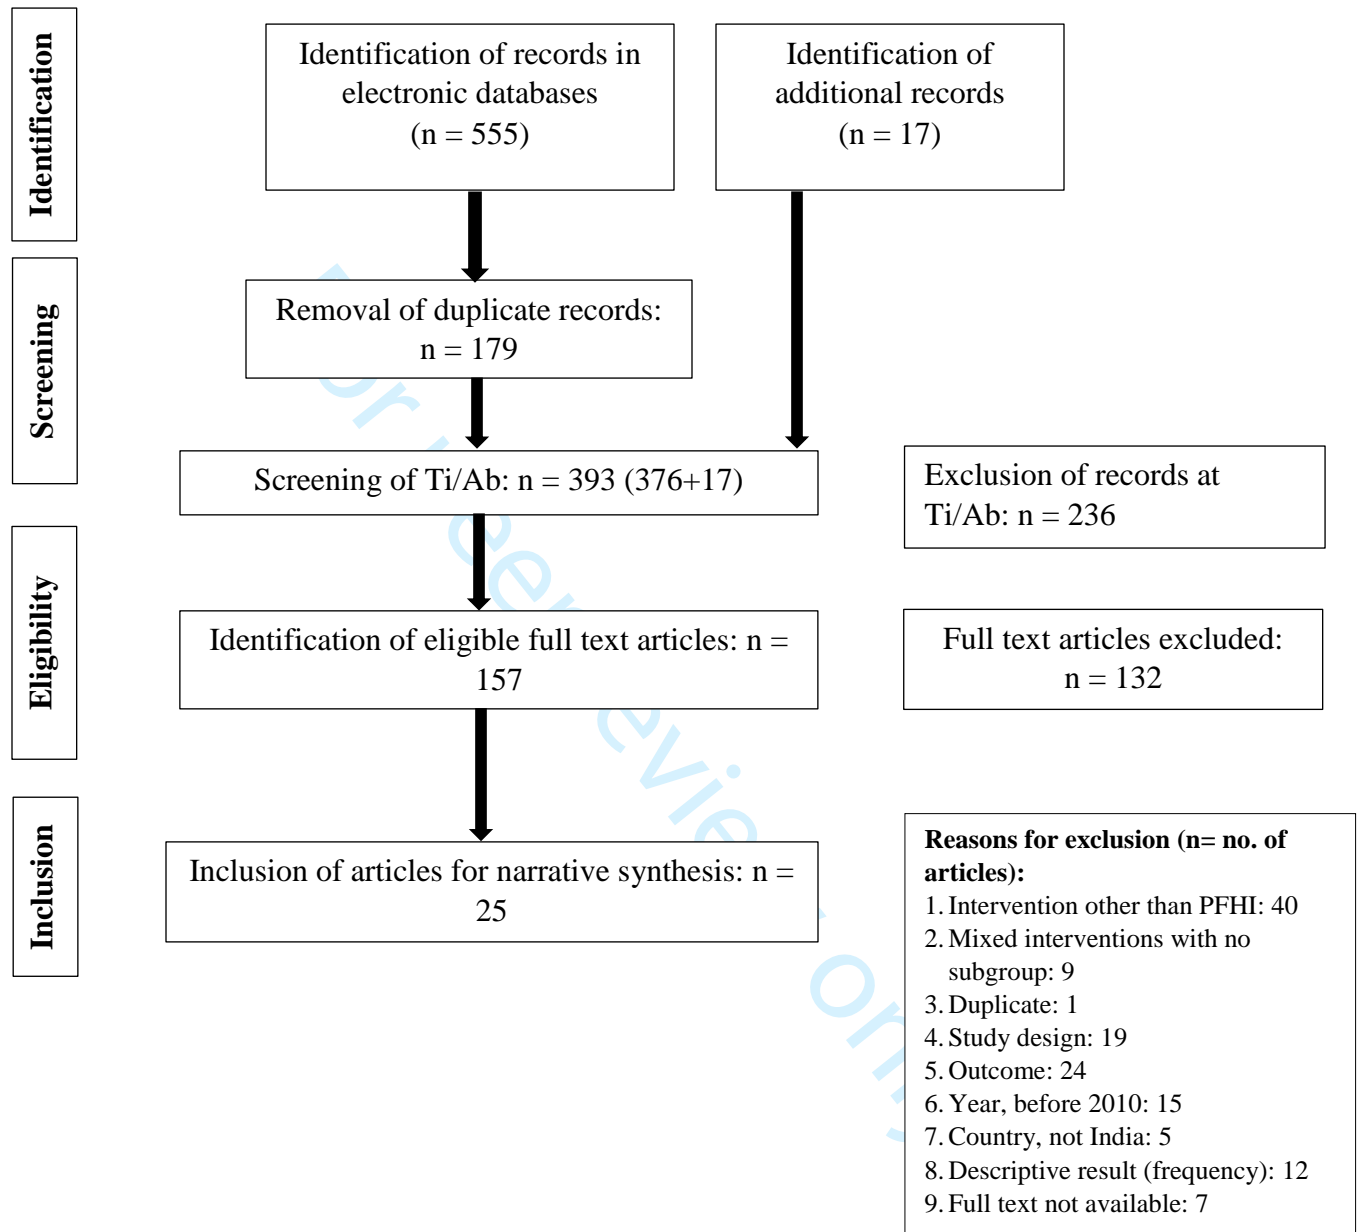

1  
2  
3  
4  
5  
6  
7  
8  
9  
10  
11  
12  
13  
14  
15  
16  
17  
18  
19  
20  
21  
22  
23  
24  
25  
26  
27  
28  
29  
30  
31  
32  
33  
34  
35  
36  
37  
38  
39  
40  
41  
42  
43  
44  
45  
46  
47  
48  
49  
50  
51  
52  
53  
54  
55  
56  
57  
58  
59  
60

For peer review only

## Supplementary file

### Contents

|                                                       |    |
|-------------------------------------------------------|----|
| 1) Search Strategy .....                              | 1  |
| 2) Table of characteristics of included studies ..... | 2  |
| 3) Detailed synthesis of findings .....               | 40 |

#### 1) Search Strategy

((("Health Insurance"[Title/Abstract] OR "Community health insurance"[Title/Abstract] OR "Social health insurance"[Title/Abstract] OR "Group health insurance"[Title/Abstract] OR "Karunya health scheme"[Title/Abstract] OR Yeshasvini[Title/Abstract] OR "Ayushman Bharat"[Title/Abstract] OR "Universal health insurance scheme"[Title/Abstract] OR "Rashtriya swasthya bima yojana"[Title/Abstract] OR "Medical Insurance"[Title/Abstract] OR "Public health insurance" [Title/Abstract] OR "Universal health care"[Title/Abstract] OR PMJAY[Title/Abstract] OR MSBY[Title/Abstract] OR RSBY[Title/Abstract] OR Aarogyasri[Title/Abstract] OR "Vajpayee Arogyashree"[Title/Abstract] OR "Kalaingar State Health Insurance Scheme"[Title/Abstract] OR ESIS[Title/Abstract] OR Mediclaim[Title/Abstract] OR CGHS[Title/Abstract] OR BKKY[Title/Abstract]) AND ("Health care utilisation"[Title/Abstract] OR "Healthcare utilization"[Title/Abstract] OR "Healthcare utilisation"[Title/Abstract] OR "Health status"[Title/Abstract] OR "Better Health"[Title/Abstract] OR "Willingness to pay"[Title/Abstract] OR WTP[Title/Abstract] OR "Readiness to pay"[Title/Abstract] OR "Financial protection"[Title/Abstract] OR "Medical service utilization"[Title/Abstract] OR enrolment[Title/Abstract] OR impact[Title/Abstract])) AND (India OR "South Asia" OR LMIC OR Indian OR "Indian states") 124 filter humans

2) Table of characteristics of included studies

| Study ID      | Objective                                                                                                 | Location | Population<br>(n, Age,<br>Gender,<br>Contextual<br>factors)                                                            | Name and<br>type of<br>insurance and<br>year | Intervention/Exposure<br><br>Details of insurance<br>Incentives/benefits<br>Time duration of<br>insurance,<br>Comparator                                                                                                    | Outcomes                                                                                                                                                                                   | Study design                                                                                                                                     |
|---------------|-----------------------------------------------------------------------------------------------------------|----------|------------------------------------------------------------------------------------------------------------------------|----------------------------------------------|-----------------------------------------------------------------------------------------------------------------------------------------------------------------------------------------------------------------------------|--------------------------------------------------------------------------------------------------------------------------------------------------------------------------------------------|--------------------------------------------------------------------------------------------------------------------------------------------------|
| Azam,<br>2017 | To evaluate<br>the impact of<br>Rastriya Swast<br>hya Bima<br>Yojana<br>(RSBY)-on-<br>RSBY<br>beneficiary | National | Data from<br>2011-12: n=<br>29755 HHs<br>(21489 rural<br>and 8257<br>urban) from<br>260 RSBY<br>districts in<br>India. | RSBY Scheme                                  | -Intervention group<br>consists of HHs that were<br>enrolled in RSBY and had<br>an RSBY smart card.<br>The beneficiary HHs were<br>entitled to a hospital<br>coverage of Indian<br>National Rupees (INR)<br>30000 per annum | Average treatment<br>impact on treated<br>(ATT), utilization<br>of health services,<br>per capita out-of-<br>pocket expenditure<br>(OOPE), and per<br>patient OOPE on<br>major morbidities | Impact evaluation<br>(secondary data) from<br>two waves of India<br>Human Development<br>survey conducted in<br>2011-12 and 2004-05<br>and Human |

|                        |                                                                                                                        |                                                                                                                 |                                                                                                       |                                   |                                                                                                                                                                           |                                                      |                                                         |
|------------------------|------------------------------------------------------------------------------------------------------------------------|-----------------------------------------------------------------------------------------------------------------|-------------------------------------------------------------------------------------------------------|-----------------------------------|---------------------------------------------------------------------------------------------------------------------------------------------------------------------------|------------------------------------------------------|---------------------------------------------------------|
|                        | households<br>(HHs)                                                                                                    |                                                                                                                 | Three states<br>viz. Andhra<br>Pradesh,<br>Karnataka and<br>Tamil Nadu<br>were not<br>included        |                                   | -Control group were the<br>HHs in the same district<br>but not enrolled in RSBY<br>or not having the RSBY<br>cards                                                        |                                                      | Development Profile<br>of India conducted in<br>1993-94 |
| Barnes et<br>al., 2017 | To estimate<br>the impact of<br>social health<br>insurance (HI)<br>on financial<br>risk by<br>utilizing data<br>from a | Sample<br>villages from<br>Shimoga, Da<br>vengere and<br>Chitradurga d<br>istricts<br>of Southern<br>Karnataka. | 272 villages<br>from the<br>northern part<br>of Karnataka<br>and 300<br>villages from<br>the southern | Vajpayee<br>Arogya Shree<br>(VAS) | Intervention: Households<br>that had access to the VAS<br>schemes<br><br>Control: HHs south of the<br>eligibility border that did<br>not have access to the VAS<br>scheme | Catastrophic health<br>expenditure (CHE)<br>and OOPE | Cross-sectional<br>household survey                     |



1  
2  
3  
4  
5  
6  
7  
8  
9  
10  
11  
12  
13  
14  
15  
16  
17  
18  
19  
20  
21  
22  
23  
24  
25  
26  
27  
28  
29  
30  
31  
32  
33  
34  
35  
36  
37  
38  
39  
40  
41  
42  
43  
44  
45  
46  
47

|                                    |                                                                                                                      |                                                                                                                                   |                                                                           |      |             |                                                                                                                       |                                                                            |
|------------------------------------|----------------------------------------------------------------------------------------------------------------------|-----------------------------------------------------------------------------------------------------------------------------------|---------------------------------------------------------------------------|------|-------------|-----------------------------------------------------------------------------------------------------------------------|----------------------------------------------------------------------------|
|                                    | natural experi<br>ment created<br>by the phased<br>roll-out of a<br>social HI<br>program for<br>the poor in<br>India | Villages from<br>Uttar<br>Kannada,<br>Haveri<br>and Bellari di<br>stricts of<br>northern part<br>of Karnataka<br>were<br>included | part of<br>Karnataka<br>Total sample<br>was 6964 HHs<br>with BPL<br>cards |      |             |                                                                                                                       |                                                                            |
| Dror<br>and Vella<br>kkal,<br>2012 | To find if<br>RSBY is<br>India's<br>flagship<br>platform for<br>the                                                  | National                                                                                                                          | Adults and<br>children                                                    | RSBY | RSBY scheme | 1. Coverage,<br>enrolment and cost<br>for providing RSBY<br>to the beneficiaries<br>2. Access to<br>hospitalizations/ | Secondary data<br>analysis from RSBY<br>data available on<br>website, 2011 |

|                                     |                                                                    |                             |                                                    |                        |                                                                                                                                                                                                                                                                         |                                                  |                                                                                   |
|-------------------------------------|--------------------------------------------------------------------|-----------------------------|----------------------------------------------------|------------------------|-------------------------------------------------------------------------------------------------------------------------------------------------------------------------------------------------------------------------------------------------------------------------|--------------------------------------------------|-----------------------------------------------------------------------------------|
|                                     | introduction of<br>Universal<br>Hospital<br>Insurance.             |                             |                                                    |                        |                                                                                                                                                                                                                                                                         | health care for the<br>poor people               |                                                                                   |
| Fan,<br>Karan and<br>Mahal,<br>2012 | To assess the<br>impact<br>of Arogyashre<br>e on household<br>OOPE | Andhra<br>Pradesh,<br>India | Households in<br>all the districts<br>of the state | Arogyashree sc<br>heme | Intervention group: people<br>living in the districts under<br>Phase 1 (2007-2008) and<br>Phase 2 (only 2008) of the<br>NSSO survey<br><br>Control group: People<br>living in the districts that<br>are not covered by with<br>Phase 1 or Phase 2 of the<br>NSSO survey | 1.Per capita OOPE<br>2. CHE<br>3. Impoverishment | Impact evaluation-<br>Analysis of NSSO and<br>consumer health<br>expenditure data |

1  
2  
3  
4  
5  
6  
7  
8  
9  
10  
11  
12  
13  
14  
15  
16  
17  
18  
19  
20  
21  
22  
23  
24  
25  
26  
27  
28  
29  
30  
31  
32  
33  
34  
35  
36  
37  
38  
39  
40  
41  
42  
43  
44  
45  
46  
47

|  |  |  |  |  |                                                                                                                                                                                                                                                                                                                                                                                  |  |  |
|--|--|--|--|--|----------------------------------------------------------------------------------------------------------------------------------------------------------------------------------------------------------------------------------------------------------------------------------------------------------------------------------------------------------------------------------|--|--|
|  |  |  |  |  | <p><b>Treatment groups</b><br/><b>(Andhra Pradesh)</b></p> <p>Phase 1: Activities started in April 2007 and renewal in April 2008. Phase I districts were Ananthapur, Mahabubnagar, and Srikakulam. n: 2004-05=1702 and 2007-08 =448</p> <p>Phase 2: Activities started in December 2007 and renewed in December 2008. Phase II districts were East Godavari, West Godavari,</p> |  |  |
|--|--|--|--|--|----------------------------------------------------------------------------------------------------------------------------------------------------------------------------------------------------------------------------------------------------------------------------------------------------------------------------------------------------------------------------------|--|--|

|              |                                     |                     |                                 |                          |                                                                                                                                                                                                                                                                                                                         |                                            |                                      |
|--------------|-------------------------------------|---------------------|---------------------------------|--------------------------|-------------------------------------------------------------------------------------------------------------------------------------------------------------------------------------------------------------------------------------------------------------------------------------------------------------------------|--------------------------------------------|--------------------------------------|
|              |                                     |                     |                                 |                          | <p>Nalgonda, Rangareddy, and Chittoor</p> <p>n: 2004-05 = 2057 and 2007-08= 863</p> <p><b>Control Group (Andhra Pradesh)</b> that were not covered by Phases 1 and 2.</p> <p>2004-2005 (n)= 5269</p> <p>2007-2008 (n)= 2172</p> <p><b>Control Groups (All India)</b></p> <p>n= 2004-05: 116,136 and 2007-08: 46,814</p> |                                            |                                      |
| Garg, Beba & | To find out the effect of enrolment | Chhattisgarh, India | NSS survey in 2004 and 2014 and | Pradha Mantri Jan Arogya | Beneficiaries of PMJAY scheme                                                                                                                                                                                                                                                                                           | Enrolment, utilization of hospital-care in | Impact evaluation from NSSO data and |

1  
2  
3  
4  
5  
6  
7  
8  
9  
10  
11  
12  
13  
14  
15  
16  
17  
18  
19  
20  
21  
22  
23  
24  
25  
26  
27  
28  
29  
30  
31  
32  
33  
34  
35  
36  
37  
38  
39  
40  
41  
42  
43  
44  
45  
46  
47

|                   |                                                                                                                                                                        |  |                                                                                                                                                                                                              |                                                                                                           |  |                              |                           |
|-------------------|------------------------------------------------------------------------------------------------------------------------------------------------------------------------|--|--------------------------------------------------------------------------------------------------------------------------------------------------------------------------------------------------------------|-----------------------------------------------------------------------------------------------------------|--|------------------------------|---------------------------|
| Tripathi,<br>2020 | under Prime<br>Minister Jan<br>Arogya<br>Yojana<br>(PMJAY) in<br>improving<br>utilization of<br>hospital<br>services and<br>financial<br>protection in<br>Chhattisgarh |  | primary<br>household<br>survey in<br>2019 (for<br>comparison)<br>NSS in 2004:<br>6375<br>individuals<br>NSS in 2014=<br>7651<br>individuals<br>Primary<br>survey in<br>2019= 15361<br>individuals<br>covered | Yojana<br>(PMJAY)<br>Mukhyamantri<br>Swasthya Bima<br>Yojana<br>(MSBY) for<br>non-poor in<br>Chhattisgarh |  | OOPE and<br>incidence of CHE | primary survey in<br>2019 |
|-------------------|------------------------------------------------------------------------------------------------------------------------------------------------------------------------|--|--------------------------------------------------------------------------------------------------------------------------------------------------------------------------------------------------------------|-----------------------------------------------------------------------------------------------------------|--|------------------------------|---------------------------|

|                                               |                                                                                                                                                                            |                                          |                              |      |                        |                                        |                                                                                                                                          |
|-----------------------------------------------|----------------------------------------------------------------------------------------------------------------------------------------------------------------------------|------------------------------------------|------------------------------|------|------------------------|----------------------------------------|------------------------------------------------------------------------------------------------------------------------------------------|
|                                               |                                                                                                                                                                            |                                          |                              |      |                        |                                        |                                                                                                                                          |
| Garg,<br>Chowdhury &<br>Sundararaman,<br>2019 | To evaluate the PFHI in three states (Andhra Pradesh, Karnataka and Tamil Nadu) in improving utilization of hospital services and financial protection against expenses of | Andhra Pradesh, Karnataka and Tamil Nadu | Below Poverty Line (BPL) HHs | PFHI | Enrolment PFHI schemes | -CHE and OOPE<br>-Hospitalization rate | Secondary data analysis of the two rounds of NSSO cross-sectional survey, 60 <sup>th</sup> round: 2004 and 71 <sup>st</sup> round: 2014. |

|                     |                                                                                                                                                   |                                                                                                                                         |                                                                                                                               |      |                          |                                                               |                                     |
|---------------------|---------------------------------------------------------------------------------------------------------------------------------------------------|-----------------------------------------------------------------------------------------------------------------------------------------|-------------------------------------------------------------------------------------------------------------------------------|------|--------------------------|---------------------------------------------------------------|-------------------------------------|
|                     | hospitalization                                                                                                                                   |                                                                                                                                         |                                                                                                                               |      |                          |                                                               |                                     |
| Ghosh & Gupta, 2017 | To assess the impact of the scheme on access to healthcare and financial protection by utilizing the latest NSSO data on morbidity and healthcare | National States that did not have any PFHI schemes other than RSBY Andhra Pradesh, Tamil Nadu, Maharashtra, Goa, Karnataka, Andaman and | 18 states, covering 35,748 HHs. Out of these 4112 HHs i.e., 11.5% were treated and 31636 HHs i.e., 88.5% of HHs were control. | RSBY | Enrolment in RSBY scheme | 1) Utilization of health care<br>2) Financial risk protection | An impact evaluation from NSSO data |

1  
2  
3  
4  
5  
6  
7  
8  
9  
10  
11  
12  
13  
14  
15  
16  
17  
18  
19  
20  
21  
22  
23  
24  
25  
26  
27  
28  
29  
30  
31  
32  
33  
34  
35  
36  
37  
38  
39  
40  
41  
42  
43  
44  
45  
46  
47

|  |  |                                                                                                                                                                                                           |  |  |  |  |  |
|--|--|-----------------------------------------------------------------------------------------------------------------------------------------------------------------------------------------------------------|--|--|--|--|--|
|  |  | <p>Nicobar<br/>Islands,<br/>Daman and<br/>Diu Dadar<br/>and Nagar<br/>Haveli were<br/>excluded.<br/>Arunachal<br/>Pradesh,<br/>Puducherry,<br/>Delhi and<br/>Jammu Kash<br/>mir were not<br/>selected</p> |  |  |  |  |  |
|--|--|-----------------------------------------------------------------------------------------------------------------------------------------------------------------------------------------------------------|--|--|--|--|--|



|                                         |                                                                                                                                    |                                                                  |                                                                                |             |                                                                                                                                                                                                                                                                                                                                                                               |                                                                                                                                                                                                                                                                                                                                                                                        |                                                                                                                                                                                                           |
|-----------------------------------------|------------------------------------------------------------------------------------------------------------------------------------|------------------------------------------------------------------|--------------------------------------------------------------------------------|-------------|-------------------------------------------------------------------------------------------------------------------------------------------------------------------------------------------------------------------------------------------------------------------------------------------------------------------------------------------------------------------------------|----------------------------------------------------------------------------------------------------------------------------------------------------------------------------------------------------------------------------------------------------------------------------------------------------------------------------------------------------------------------------------------|-----------------------------------------------------------------------------------------------------------------------------------------------------------------------------------------------------------|
| <p>Johnson &amp; Krishnaswamy, 2012</p> | <p>To estimate the impact of RSBY on hospitalization and OOP health spending using data from the NSSO from 2004-05 and 2009-10</p> | <p>All India except Andhra Pradesh, Karnataka and Tamil Nadu</p> | <p>n= 297 control and 204 treatment districts with a total of 186,065 HHs.</p> | <p>RSBY</p> | <p>Out of the total 186,065 HHs, 102,810 were from the Pre-intervention round and 83,255 from the post round</p> <p>Out of the 83,255 HHs in the post round observations, 25,548 HHs were surveyed two months after RSBY was introduced (this was fixed as the minimum duration to be considered as treated) and hence treated. Out of these, 12,995 were predicted to be</p> | <p>1. Impact of RSBY (in INR per capita per month)</p> <ul style="list-style-type: none"> <li>-OP expenditure</li> <li>-IP expenditure</li> <li>-Total medical expenditure</li> <li>- IP drug + tests</li> <li>- IP fees</li> <li>-IP hosp. fees.</li> <li>- Was hospitalized</li> <li>- Has OP visit</li> <li>- IP &gt; Rs. 5000 (INR)</li> <li>- IP &gt; Rs. 10,000 (INR)</li> </ul> | <p>Secondary data analysis of NSSO data</p> <p>Used NSSO round 61 (conducted in 2004-05) and round 66 (conducted in 2009-10), as the pre and post surveys for measuring the potential impact of RSBY.</p> |
|-----------------------------------------|------------------------------------------------------------------------------------------------------------------------------------|------------------------------------------------------------------|--------------------------------------------------------------------------------|-------------|-------------------------------------------------------------------------------------------------------------------------------------------------------------------------------------------------------------------------------------------------------------------------------------------------------------------------------------------------------------------------------|----------------------------------------------------------------------------------------------------------------------------------------------------------------------------------------------------------------------------------------------------------------------------------------------------------------------------------------------------------------------------------------|-----------------------------------------------------------------------------------------------------------------------------------------------------------------------------------------------------------|

1  
2  
3  
4  
5  
6  
7  
8  
9  
10  
11  
12  
13  
14  
15  
16  
17  
18  
19  
20  
21  
22  
23  
24  
25  
26  
27  
28  
29  
30  
31  
32  
33  
34  
35  
36  
37  
38  
39  
40  
41  
42  
43  
44  
45  
46  
47

|  |  |  |  |  |                                                                                                               |                                                                                                                                                                                                                                                                      |  |
|--|--|--|--|--|---------------------------------------------------------------------------------------------------------------|----------------------------------------------------------------------------------------------------------------------------------------------------------------------------------------------------------------------------------------------------------------------|--|
|  |  |  |  |  | <p>a BPL card holder and</p> <p>hence in effect the treated</p> <p>sub-sample</p> <p>RSBY in reducing OOP</p> | <p>-Ratio IP/<br/>HHD Exp &gt; 10%</p> <p>-Ratio IP/ HHD<br/>Exp &gt; 20%</p> <p>- Ratio IP/ HHD<br/>Exp &gt; 40%</p> <p>Small decrease in<br/>out-of-pocket<br/>household<br/>outpatient<br/>expenditure and<br/>subsequently total<br/>medical<br/>expenditure</p> |  |
|--|--|--|--|--|---------------------------------------------------------------------------------------------------------------|----------------------------------------------------------------------------------------------------------------------------------------------------------------------------------------------------------------------------------------------------------------------|--|

|                                            |                                                                                                                                                                                                |                 |                                                                                                                                                                                   |                                              |                                                                                                                                                                                                                                                                                                                                            |                                                                                                                                                                                                                                                   |                                                                                                 |
|--------------------------------------------|------------------------------------------------------------------------------------------------------------------------------------------------------------------------------------------------|-----------------|-----------------------------------------------------------------------------------------------------------------------------------------------------------------------------------|----------------------------------------------|--------------------------------------------------------------------------------------------------------------------------------------------------------------------------------------------------------------------------------------------------------------------------------------------------------------------------------------------|---------------------------------------------------------------------------------------------------------------------------------------------------------------------------------------------------------------------------------------------------|-------------------------------------------------------------------------------------------------|
| <p>Karan,<br/>Yip,<br/>Mahal,<br/>2017</p> | <p>To assess, at the national level, the impact of RSBY on financial risk protection of HHs using data from 3 waves of cross-sectional HH surveys of the NSSO and district level enrolment</p> | <p>National</p> | <p>The study used data from three waves of HH CES: 1999 to 2000 (T1 pre-intervention), 2004-05 (T2: pre-intervention) and 2011-12 (post-intervention), conducted by the NSSO.</p> | <p>RSBY implementation began in 2008-09.</p> | <p><b>Treatment group:</b> Poor HHs in RSBY implementing districts. Further divided into districts, which began participating in RSBY on or before March 2010 and between April 2010 &amp; March 2012.<br/><b>Control:</b> Poor in non-RSBY districts. Poor: belonging to the two poorest expenditure quintiles as a proxy for BPL HHs</p> | <p>OOPE: in terms of inpatient, outpatient &amp; total OOP. Each of these three further includes Probability of any OOP, OOP Level (INR), OOP Share and probability of catastrophic Outcome measured for the time periods 2000, 2005 and 2012</p> | <p>Impact evaluation using repeated measures cross sectional surveys- Analysis of NSSO data</p> |
|--------------------------------------------|------------------------------------------------------------------------------------------------------------------------------------------------------------------------------------------------|-----------------|-----------------------------------------------------------------------------------------------------------------------------------------------------------------------------------|----------------------------------------------|--------------------------------------------------------------------------------------------------------------------------------------------------------------------------------------------------------------------------------------------------------------------------------------------------------------------------------------------|---------------------------------------------------------------------------------------------------------------------------------------------------------------------------------------------------------------------------------------------------|-------------------------------------------------------------------------------------------------|

|                     |                                                                                                           |                                |                                                                                      |                                                                     |                                                                              |                                                                                                                                                       |                                                                                        |
|---------------------|-----------------------------------------------------------------------------------------------------------|--------------------------------|--------------------------------------------------------------------------------------|---------------------------------------------------------------------|------------------------------------------------------------------------------|-------------------------------------------------------------------------------------------------------------------------------------------------------|----------------------------------------------------------------------------------------|
|                     | information from RSBY records                                                                             |                                | Sample sizes in each of the three rounds was between 100,000 and 125,000 households. |                                                                     |                                                                              |                                                                                                                                                       |                                                                                        |
| Katyal et al., 2015 | To assess changes in accessibility, affordability and perceptions of efficiency of private health care IP | Andhra Pradesh and Maharashtra | Used two rounds of NSSO data: 2004 and 2012. Total HHs surveyed (urban): Andhra      | RSBY in Maharashtra and Rajiv Arogya Shree (RAS) in Andhra Pradesh. | Intervention 1: RAS in Andhra Pradesh<br>Intervention 2: RSBY in Maharashtra | -Access to IP care [Hospitalization rate: no. of people hospitalized during the previous year per 1000 population]<br>-Expenditure on hospitalization | A retrospective, longitudinal, controlled quasi-experimental Study (Two large surveys) |

1  
2  
3  
4  
5  
6  
7  
8  
9  
10  
11  
12  
13  
14  
15  
16  
17  
18  
19  
20  
21  
22  
23  
24  
25  
26  
27  
28  
29  
30  
31  
32  
33  
34  
35  
36  
37  
38  
39  
40  
41  
42  
43  
44  
45  
46  
47

|  |                                                                                            |  |                                                                                                                                                                                        |  |  |                                                                                                                                                                                                                                                                                       |  |
|--|--------------------------------------------------------------------------------------------|--|----------------------------------------------------------------------------------------------------------------------------------------------------------------------------------------|--|--|---------------------------------------------------------------------------------------------------------------------------------------------------------------------------------------------------------------------------------------------------------------------------------------|--|
|  | <p>treatment across the states of Maharashtra and Andhra Pradesh from 2004–05 to 2012.</p> |  | <p>Pradesh = 2004: 1824, 2012: 3715; Maharashtra= 2004: 2664, 2012: 5038. Total HHs surveyed (rural): Andhra Pradesh = 2004: 3235, 2012: 4908; Maharashtra= 2004: 2650, 2012: 5035</p> |  |  | <p>[average OOPE for IP care per individual within 1 year of the survey] - Expenditure on high-cost treatments [average OOPE for IP care within 1 year of the survey for both public and private hospitals per episode of cardiac &amp; nephrology treatments, which were used as</p> |  |
|--|--------------------------------------------------------------------------------------------|--|----------------------------------------------------------------------------------------------------------------------------------------------------------------------------------------|--|--|---------------------------------------------------------------------------------------------------------------------------------------------------------------------------------------------------------------------------------------------------------------------------------------|--|

|                                                                                                                                              |                             |                                                                                                                         |                                                                       |                                                                                                   |                                                                                                               |                                                                                                 |                                                                                                                                                       |                                                                                                                                      |
|----------------------------------------------------------------------------------------------------------------------------------------------|-----------------------------|-------------------------------------------------------------------------------------------------------------------------|-----------------------------------------------------------------------|---------------------------------------------------------------------------------------------------|---------------------------------------------------------------------------------------------------------------|-------------------------------------------------------------------------------------------------|-------------------------------------------------------------------------------------------------------------------------------------------------------|--------------------------------------------------------------------------------------------------------------------------------------|
|                                                                                                                                              |                             |                                                                                                                         |                                                                       |                                                                                                   |                                                                                                               | proxies for high-cost treatments.]<br><br>-Efficiency:<br><br>duration of hospital stay in days |                                                                                                                                                       |                                                                                                                                      |
| 17<br>18<br>19<br>20<br>21<br>22<br>23<br>24<br>25<br>26<br>27<br>28<br>29<br>30<br>31<br>32<br>33<br>34<br>35<br>36<br>37<br>38<br>39<br>40 | Khetrupal and Acharya, 2019 | To examine the scheme design and the incentive structure under RSBY and its implications for delivering health services | Patiala and Yamunanagar districts in the states of Punjab and Haryana | <b>Quantitative:</b><br>Total sample participants n=751<br>selected from RSBY empaneled hospitals | RSBY Introduced in 2008 by the Ministry of Labour and Employment, Government of India; to provide HI coverage | Enrolment in health insurance via RSBY scheme                                                   | A) Gaps in the scheme categorized by:<br>1. Allocation of roles and responsibilities<br>2. Enrolment of beneficiaries<br>3. Empanelment of facilities | Mixed method study<br>Quantitative (Exit interviews)<br>Qualitative (in depth interviews of stakeholders)<br>Secondary data analysis |

1  
2  
3  
4  
5  
6  
7  
8  
9  
10  
11  
12  
13  
14  
15  
16  
17  
18  
19  
20  
21  
22  
23  
24  
25  
26  
27  
28  
29  
30  
31  
32  
33  
34  
35  
36  
37  
38  
39  
40  
41  
42  
43  
44  
45  
46  
47

|  |                                |  |                                                                                                                                                                                 |                       |  |                                                                                                      |  |
|--|--------------------------------|--|---------------------------------------------------------------------------------------------------------------------------------------------------------------------------------|-----------------------|--|------------------------------------------------------------------------------------------------------|--|
|  | to the intended beneficiaries. |  | -RSBY participants=387<br>-Non RSBY participants=364<br><br><b>Qualitative:</b><br>20 Key stakeholders' interviews of RSBY i.e., policy makers, representative s from insurance | to people living BPL. |  | 4. Monitoring and supervision,<br>5. Package rates.<br><br>B) OOPE of RSBY and non-RSBY participants |  |
|--|--------------------------------|--|---------------------------------------------------------------------------------------------------------------------------------------------------------------------------------|-----------------------|--|------------------------------------------------------------------------------------------------------|--|

|                                                |                                                                                                                                                      |          |                                                                                |                          |                          |                                       |                                                                          |
|------------------------------------------------|------------------------------------------------------------------------------------------------------------------------------------------------------|----------|--------------------------------------------------------------------------------|--------------------------|--------------------------|---------------------------------------|--------------------------------------------------------------------------|
|                                                |                                                                                                                                                      |          | companies,<br>state<br>representative<br>s, public and<br>private<br>providers |                          |                          |                                       |                                                                          |
| Mahapatra<br>o, Singh<br>and<br>Singh,<br>2018 | To understand<br>the impact of<br>HI schemes on<br>tackling the<br>economic<br>burden of<br>OOPE and its<br>effectiveness<br>in reducing<br>economic | National | NSSO 2014<br>data                                                              | Government HI<br>schemes | Enrolment in PFHI scheme | Healthcare<br>utilization and<br>OOPE | NSSO data, 71 <sup>st</sup> round<br>in 2014, secondary<br>data analysis |



|                                |                                                                                                                |                               |                                                                                     |                                     |                          |                                                                                                   |                                                                                                                                          |
|--------------------------------|----------------------------------------------------------------------------------------------------------------|-------------------------------|-------------------------------------------------------------------------------------|-------------------------------------|--------------------------|---------------------------------------------------------------------------------------------------|------------------------------------------------------------------------------------------------------------------------------------------|
|                                | inequalities in healthcare spending                                                                            |                               |                                                                                     |                                     |                          |                                                                                                   |                                                                                                                                          |
| Nandi, Schneider & Dixit, 2017 | To examine enrolment, utilization (public and private) and OOPE for the insured and uninsured, in Chhattisgarh | Chhattisgarh, India           | Included 1205 HHs and 6026 individuals (HH members), HHs as the second-stage units. | Government Health insurance schemes | Enrolment in RSBY scheme | -Determinants of enrolment<br>-Healthcare utilization<br>-OOPE<br>-Increased hospitalization rate | Secondary analysis of 25 <sup>th</sup> Schedule of the 71st round of the cross-sectional Indian NSSO data between January and June 2014. |
| Philip, Kannan & Sharma, 2016  | 1. To compare the sociodemographic                                                                             | Trivandrum district of Kerala | n= 149 insured and 147 uninsured BPL HHs                                            | CHIS                                | Enrolment in CHIS        | 1. Coverage of CHIS<br>2. Healthcare utilization,                                                 | Cross-sectional survey in 2011                                                                                                           |

|                                                                                                                                                                                                                                                                                                                                    |                                                                                                                                                                                                                                                       |  |                                                                                                                                  |  |  |                                                                                                                                                                                                   |  |
|------------------------------------------------------------------------------------------------------------------------------------------------------------------------------------------------------------------------------------------------------------------------------------------------------------------------------------|-------------------------------------------------------------------------------------------------------------------------------------------------------------------------------------------------------------------------------------------------------|--|----------------------------------------------------------------------------------------------------------------------------------|--|--|---------------------------------------------------------------------------------------------------------------------------------------------------------------------------------------------------|--|
| <p>1<br/>2<br/>3<br/>4<br/>5<br/>6<br/>7<br/>8<br/>9<br/>10<br/>11<br/>12<br/>13<br/>14<br/>15<br/>16<br/>17<br/>18<br/>19<br/>20<br/>21<br/>22<br/>23<br/>24<br/>25<br/>26<br/>27<br/>28<br/>29<br/>30<br/>31<br/>32<br/>33<br/>34<br/>35<br/>36<br/>37<br/>38<br/>39<br/>40<br/>41<br/>42<br/>43<br/>44<br/>45<br/>46<br/>47</p> | <p>hic &amp; health<br/>utilization<br/>pattern (OP<br/>and IP<br/>services) of<br/>BPL HHs<br/>insured in<br/>comprehensive<br/>health<br/>insurance<br/>scheme<br/>(CHIS). 2. To<br/>find the<br/>correlates of<br/>insurance<br/>status and IP</p> |  | <p>with 667 and<br/>578 members,<br/>respectively.<br/>Age: 33.0 ±<br/>18.2 years;<br/>HH size was<br/>4.2 ± 1.8<br/>members</p> |  |  | <p>3. OOPE associated<br/>with IP service<br/>4. Factors: Socio-<br/>demographics,<br/>understanding<br/>regarding insurance,<br/>type of insurance<br/>aware of,<br/>information on<br/>RSBY</p> |  |
|------------------------------------------------------------------------------------------------------------------------------------------------------------------------------------------------------------------------------------------------------------------------------------------------------------------------------------|-------------------------------------------------------------------------------------------------------------------------------------------------------------------------------------------------------------------------------------------------------|--|----------------------------------------------------------------------------------------------------------------------------------|--|--|---------------------------------------------------------------------------------------------------------------------------------------------------------------------------------------------------|--|

1  
2  
3  
4  
5  
6  
7  
8  
9  
10  
11  
12  
13  
14  
15  
16  
17  
18  
19  
20  
21  
22  
23  
24  
25  
26  
27  
28  
29  
30  
31  
32  
33  
34  
35  
36  
37  
38  
39  
40  
41  
42  
43  
44  
45  
46  
47

|                     |                                                                                                                                    |          |                                                                                                                                 |      |              |                                                                                                                                                      |                                                                                                                    |
|---------------------|------------------------------------------------------------------------------------------------------------------------------------|----------|---------------------------------------------------------------------------------------------------------------------------------|------|--------------|------------------------------------------------------------------------------------------------------------------------------------------------------|--------------------------------------------------------------------------------------------------------------------|
|                     | service utilization. 3. To examine the OOPE for IP services                                                                        |          |                                                                                                                                 |      |              |                                                                                                                                                      |                                                                                                                    |
| Ranjan et al., 2018 | To discuss a) the coverage & effectiveness of both governments purchasing through insurance and government provision of tax-funded | National | A total of 65,932 HHs (rural: 36480, urban: 29452) were surveyed for the entire Indian Union, which included a total of 333,104 | PFHI | PFHI schemes | 1. OOPE, CHE<br>2. Choice of provider.<br>3. HI coverage, type.<br>3. Equity in PFHI coverage<br>4. Impoverishment effect of OOPE on hospitalization | Unit records of the “Social Consumption: Health” survey (71st round) conducted by the NSSO in January to June 2014 |

1  
2  
3  
4  
5  
6  
7  
8  
9  
10  
11  
12  
13  
14  
15  
16  
17  
18  
19  
20  
21  
22  
23  
24  
25  
26  
27  
28  
29  
30  
31  
32  
33  
34  
35  
36  
37  
38  
39  
40  
41  
42  
43  
44  
45  
46  
47

|  |                                                                                                                                                                                           |  |                                                                                  |  |  |                                                                          |  |
|--|-------------------------------------------------------------------------------------------------------------------------------------------------------------------------------------------|--|----------------------------------------------------------------------------------|--|--|--------------------------------------------------------------------------|--|
|  | <p>free or subsidized care as strategies of financial protection; b) the contribution that PFHI makes to the reduction in CHE due to hospitalization; and c) the equity dimensions of</p> |  | <p>individuals (rural: 189573, urban: 143531; male: 168697 females: 164407).</p> |  |  | <p>5. Factors: Socio-economic<br/>6. Increased hospitalization rates</p> |  |
|--|-------------------------------------------------------------------------------------------------------------------------------------------------------------------------------------------|--|----------------------------------------------------------------------------------|--|--|--------------------------------------------------------------------------|--|

1  
2  
3  
4  
5  
6  
7  
8  
9  
10  
11  
12  
13  
14  
15  
16  
17  
18  
19  
20  
21  
22  
23  
24  
25  
26  
27  
28  
29  
30  
31  
32  
33  
34  
35  
36  
37  
38  
39  
40  
41  
42  
43  
44  
45  
46  
47

|                  |                                                                                                                                                          |                                |                                               |                                                                             |                                                                                                                                                                                                                                                                                           |                                                                                                                                                                 |                                                                                                                                                                                                      |
|------------------|----------------------------------------------------------------------------------------------------------------------------------------------------------|--------------------------------|-----------------------------------------------|-----------------------------------------------------------------------------|-------------------------------------------------------------------------------------------------------------------------------------------------------------------------------------------------------------------------------------------------------------------------------------------|-----------------------------------------------------------------------------------------------------------------------------------------------------------------|------------------------------------------------------------------------------------------------------------------------------------------------------------------------------------------------------|
|                  | both financial protection strategies.                                                                                                                    |                                |                                               |                                                                             |                                                                                                                                                                                                                                                                                           |                                                                                                                                                                 |                                                                                                                                                                                                      |
| Rao et al., 2014 | To compare the effects of health innovations over time on access to and OOPE on IP care in Andhra Pradesh & Maharashtra and to assess whether the Andhra | Andhra Pradesh and Maharashtra | Survey of 18 696 HHs across 2 states and 1871 | i. RAS Health Insurance Scheme of Andhra Pradesh<br>ii. RSBY in Maharashtra | Enrolment in RAS or RSBY<br>Effect of i. RAS HI Scheme of Andhra Pradesh launched in 2007 to provide treatment for serious and life threatening illnesses. Families with BPL card are automatically enrolled. Enrollees make no contribution, the annual benefit is a maximum of (INR 200 | 1. Average IP expenditure per HH per year, 2. Large OOP IP expenditure,<br>3. Large borrowing<br>4. Hospitalization rate<br>5. Factors: Setting, socio-economic | Secondary data analysis: Repeated measures survey (Pre-post) using difference-in-difference (DID).<br>Baseline: NSSO 60th decennial round HH survey undertaken in 2004.<br>Follow up survey: in 2012 |

|  |                                                                                                                                                       |  |  |  |                                                                                                                                                                                                                                                                                                                                                                                                                                                |  |  |
|--|-------------------------------------------------------------------------------------------------------------------------------------------------------|--|--|--|------------------------------------------------------------------------------------------------------------------------------------------------------------------------------------------------------------------------------------------------------------------------------------------------------------------------------------------------------------------------------------------------------------------------------------------------|--|--|
|  | <p>Pradesh</p> <p>initiatives</p> <p>had larger or</p> <p>smaller</p> <p>beneficial</p> <p>effects than</p> <p>those found in</p> <p>Maharashtra.</p> |  |  |  | <p>000) per family per year</p> <p>and there is no limit on the</p> <p>size of the family.</p> <p>ii. RSBY in Maharashtra</p> <p>launched in 2008</p> <p>(enrolment began in 2009)</p> <p>and provides access to free</p> <p>IP hospital care up to (INR</p> <p>30 000) per</p> <p>family per year. HHs pay</p> <p>contribution of INR 30 for</p> <p>registration and annual</p> <p>renewal. Up to five family</p> <p>members are covered.</p> |  |  |
|--|-------------------------------------------------------------------------------------------------------------------------------------------------------|--|--|--|------------------------------------------------------------------------------------------------------------------------------------------------------------------------------------------------------------------------------------------------------------------------------------------------------------------------------------------------------------------------------------------------------------------------------------------------|--|--|

1  
2  
3  
4  
5  
6  
7  
8  
9  
10  
11  
12  
13  
14  
15  
16  
17  
18  
19  
20  
21  
22  
23  
24  
25  
26  
27  
28  
29  
30  
31  
32  
33  
34  
35  
36  
37  
38  
39  
40  
41  
42  
43  
44  
45  
46  
47

|                        |                                                                                                |          |                                                                                                                                                                              |                                                               |                        |                                                                                                                                               |                                                               |
|------------------------|------------------------------------------------------------------------------------------------|----------|------------------------------------------------------------------------------------------------------------------------------------------------------------------------------|---------------------------------------------------------------|------------------------|-----------------------------------------------------------------------------------------------------------------------------------------------|---------------------------------------------------------------|
| Ravi & Bergkvist, 2014 | To analyze the impact of PFHI viz. RSBY and different state-sponsored health insurance schemes | National | Districts where the PFHI schemes were implemented For RSBY impact: The districts were divided into two samples (1) where the scheme was implemented before July 2010 (end of | Different PFHI schemes including RSBY and state level schemes | Different PFHI schemes | Financial protection<br>1) Overall impoverishment<br>-hospitalization<br>-OOPE<br>-Outpatient<br>-Drugs<br>2) CHE-40%<br>3) Poverty gap index | Secondary data<br>Analysis of a cross-sectional survey (NSSO) |
|------------------------|------------------------------------------------------------------------------------------------|----------|------------------------------------------------------------------------------------------------------------------------------------------------------------------------------|---------------------------------------------------------------|------------------------|-----------------------------------------------------------------------------------------------------------------------------------------------|---------------------------------------------------------------|

|                                         |                                                                                     |                                                                                           |                                                                                                                              |      |                   |                                                                                                    |                                                                                                                      |
|-----------------------------------------|-------------------------------------------------------------------------------------|-------------------------------------------------------------------------------------------|------------------------------------------------------------------------------------------------------------------------------|------|-------------------|----------------------------------------------------------------------------------------------------|----------------------------------------------------------------------------------------------------------------------|
|                                         |                                                                                     |                                                                                           | NSSO survey)<br>and (2) where<br>the scheme<br>was<br>implemented<br>before July<br>2009<br>(beginning of<br>NSSO<br>survey) |      |                   |                                                                                                    |                                                                                                                      |
| Raza, van<br>de Poel,<br>Panda,<br>2016 | 1. To analyze<br>HH level<br>determinants<br>of RSBY<br>enrolment<br>using HH level | Kanpur Dehat<br>& Pratapgarh<br>districts in<br>Uttar Pradesh<br>and Vaishali<br>in Bihar | Self-help<br>group (SHG)<br>members or<br>head of the<br>HHs. Baseline<br>survey: March                                      | RSBY | Enrolment in RSBY | 1. Determinants of<br>enrolment in health<br>insurance<br>2. Determinants of<br>re-enrolment in HI | Secondary data<br>analysis of the data<br>collected in 2012-2013<br>as a part of an<br>evaluation of CBHI<br>schemes |



1  
2  
3  
4  
5  
6  
7  
8  
9  
10  
11  
12  
13  
14  
15  
16  
17  
18  
19  
20  
21  
22  
23  
24  
25  
26  
27  
28  
29  
30  
31  
32  
33  
34  
35  
36  
37  
38  
39  
40  
41  
42  
43  
44  
45  
46  
47

|  |                                                                                                                                                                                                                       |  |                                                                                                                |  |  |                                                  |  |
|--|-----------------------------------------------------------------------------------------------------------------------------------------------------------------------------------------------------------------------|--|----------------------------------------------------------------------------------------------------------------|--|--|--------------------------------------------------|--|
|  | <p>panel data collected in 2012 &amp; 2013</p> <p>2. To investigate the determinants of dropping out of the scheme.</p> <p>3. To investigate whether RSBY membership is associated with increased use of hospital</p> |  | <p>and May 2010 (3,686 HHs) and follow-up survey: March and April in 2012 (3,318 HHs) and 2013 (3307 HHs).</p> |  |  | <p>3. Hospital care and financial protection</p> |  |
|--|-----------------------------------------------------------------------------------------------------------------------------------------------------------------------------------------------------------------------|--|----------------------------------------------------------------------------------------------------------------|--|--|--------------------------------------------------|--|

|                        |                                                                                                                                                                 |                               |                                          |      |                                                                                                                                                                                                                                                      |      |                                                            |
|------------------------|-----------------------------------------------------------------------------------------------------------------------------------------------------------------|-------------------------------|------------------------------------------|------|------------------------------------------------------------------------------------------------------------------------------------------------------------------------------------------------------------------------------------------------------|------|------------------------------------------------------------|
|                        | care and financial protection.                                                                                                                                  |                               |                                          |      |                                                                                                                                                                                                                                                      |      |                                                            |
| Sabharwal et al., 2014 | To analyze the effects of RSBY on socially excluded HHs (focusing on Scheduled Castes (SC), Muslims and upper caste poor) in two states in India: Uttar Pradesh | Uttar Pradesh and Maharashtra | Sample size was 1500,750 from each state | RSBY | <b>Target group:</b> SC, Muslim and upper caste poor HHs who were beneficiaries of RSBY (whether they have used the smart card or not)<br><br><b>Control group:</b> SC, Muslim and upper caste poor HHs who were eligible for RSBY but not enrolled. | OOPE | Quasi experimental mixed methods study, April to July 2012 |

|                             |                                                                                              |          |                                                                                                                                         |                                         |                                                                                                                                                                                                                                       |                                                                                                                                                                                                  |                                                                                                            |
|-----------------------------|----------------------------------------------------------------------------------------------|----------|-----------------------------------------------------------------------------------------------------------------------------------------|-----------------------------------------|---------------------------------------------------------------------------------------------------------------------------------------------------------------------------------------------------------------------------------------|--------------------------------------------------------------------------------------------------------------------------------------------------------------------------------------------------|------------------------------------------------------------------------------------------------------------|
|                             | and<br>Maharashtra                                                                           |          |                                                                                                                                         |                                         |                                                                                                                                                                                                                                       |                                                                                                                                                                                                  |                                                                                                            |
| Selvaraj,<br>Karan,<br>2012 | To capture the impact, if any, of the PFHI programmes on financial risk protection in India. | National | NSSO data of 2003-04 as pre-intervention and 2009-10 as post intervention. HHs in 2004-05 were 1,24,644 (79,298 rural and 45,346 urban) | RSBY and state health insurance schemes | RSBY and other state insurances implemented in gradually from 2007 to 2009.<br><b>RSBY: 247 districts; State insurance: 74 districts</b> (Andhra Pradesh n=23, Karnataka n=22 and Tamil Nadu n=29); and <b>control: 291 districts</b> | -OOP spending (IP, OP, total OOP and drug expenditure), its trends and patterns.<br>-Change in OOP expenditure due to HI<br>-Trends in catastrophic payments<br>Recall period: non institutional | Pre (2003-04)-post (2009-10) study and Case-control approach based on secondary data analysis of NSSO data |

1  
2  
3  
4  
5  
6  
7  
8  
9  
10  
11  
12  
13  
14  
15  
16  
17  
18  
19  
20  
21  
22  
23  
24  
25  
26  
27  
28  
29  
30  
31  
32  
33  
34  
35  
36  
37  
38  
39  
40  
41  
42  
43  
44  
45  
46  
47

|  |  |  |                                                                                  |  |  |                                                                                                                                                                                                                                                      |  |
|--|--|--|----------------------------------------------------------------------------------|--|--|------------------------------------------------------------------------------------------------------------------------------------------------------------------------------------------------------------------------------------------------------|--|
|  |  |  | and 1,00,855<br>HHs (59,119<br>rural and<br>41,736 urban)<br>during 2009-<br>10. |  |  | medical expenses:<br>30 day.<br>Institutional health<br>spending: 365 days<br>recall.<br>Total OOP:<br>summation of IP<br>and OP expenses.<br>Catastrophic<br>headcount: No. of<br>HHs making<br>OOPE greater than<br>10% of total HH<br>expenditure |  |
|--|--|--|----------------------------------------------------------------------------------|--|--|------------------------------------------------------------------------------------------------------------------------------------------------------------------------------------------------------------------------------------------------------|--|

1  
2  
3  
4  
5  
6  
7  
8  
9  
10  
11  
12  
13  
14  
15  
16  
17  
18  
19  
20  
21  
22  
23  
24  
25  
26  
27  
28  
29  
30  
31  
32  
33  
34  
35  
36  
37  
38  
39  
40  
41  
42  
43  
44  
45  
46  
47

|                |                                                                                                                                                                             |           |                                                                                                                                                                    |      |                                                               |                                |                                            |
|----------------|-----------------------------------------------------------------------------------------------------------------------------------------------------------------------------|-----------|--------------------------------------------------------------------------------------------------------------------------------------------------------------------|------|---------------------------------------------------------------|--------------------------------|--------------------------------------------|
| Sinha,<br>2018 | To assess whether RSBY had improved care- seeking and reduced incidences of CHE and health expenditure-induced poverty among the insured population. To explore whether the | Jharkhand | A matched controlled cross-sectional study was conducted in two purposively selected administrative blocks, namely Silli and Bundu of Ranchi district in Jharkhand | RSBY | Enrolment in RSBY<br>Total 1643 HHs<br>873 RSBY, 770 Non-RSBY | Healthcare utilization and CHE | A matched controlled cross-sectional study |
|----------------|-----------------------------------------------------------------------------------------------------------------------------------------------------------------------------|-----------|--------------------------------------------------------------------------------------------------------------------------------------------------------------------|------|---------------------------------------------------------------|--------------------------------|--------------------------------------------|

|                     |                                                                                                                                                                          |                  |                                  |                                     |                                                                                                                                                                                                                 |                                                                                                                |                                                               |
|---------------------|--------------------------------------------------------------------------------------------------------------------------------------------------------------------------|------------------|----------------------------------|-------------------------------------|-----------------------------------------------------------------------------------------------------------------------------------------------------------------------------------------------------------------|----------------------------------------------------------------------------------------------------------------|---------------------------------------------------------------|
|                     | benefits were equitable.                                                                                                                                                 |                  | between April to June 2014       |                                     |                                                                                                                                                                                                                 |                                                                                                                |                                                               |
| Sood & Wagner, 2016 | To evaluate the effects of a government insurance programme covering tertiary care for the poor in Karnataka, India—VAS—on treatment seeking and postoperative outcomes. | Karnataka, India | 572 villages in Karnataka, India | A government insurance program: VAS | 31 476 HHs (22796 BPL and 8680 above poverty line (APL) in 300 villages where the scheme was implemented and 28 633 HHs (21767 BPL and 6866 APL) in 272 neighboring matched villages ineligible for the scheme. | 1) Treatment seeking behavior<br>2) Post-operative wellbeing<br>3) Post-operative infections and re-admissions | A quasi- experimental design<br>February 2010 to August 2012. |

1  
2  
3  
4  
5  
6  
7  
8  
9  
10  
11  
12  
13  
14  
15  
16  
17  
18  
19  
20  
21  
22  
23  
24  
25  
26  
27  
28  
29  
30  
31  
32  
33  
34  
35  
36  
37  
38  
39  
40  
41  
42  
43  
44  
45  
46  
47

|                   |                                                                                                                                                            |                  |                                  |                                     |                                                                                                                                                                                               |                                    |                                                              |
|-------------------|------------------------------------------------------------------------------------------------------------------------------------------------------------|------------------|----------------------------------|-------------------------------------|-----------------------------------------------------------------------------------------------------------------------------------------------------------------------------------------------|------------------------------------|--------------------------------------------------------------|
| Sood et al., 2014 | To evaluate the effects of a government insurance program covering tertiary care for people BPL in Karnataka, India, on OOPE, hospital use, and mortality. | Karnataka, India | 572 villages in Karnataka, India | A government insurance program: VAS | 31 476 HHs (22 796 BPL and 8680 APL) in 300 villages where the scheme was implemented and 28 633 HHs (21 767 BPL and 6866 APL) in 272 neighboring matched villages ineligible for the scheme. | OOPE, hospital use, and mortality. | Quasi- randomized trial<br><br>February 2010 to August 2012. |
|-------------------|------------------------------------------------------------------------------------------------------------------------------------------------------------|------------------|----------------------------------|-------------------------------------|-----------------------------------------------------------------------------------------------------------------------------------------------------------------------------------------------|------------------------------------|--------------------------------------------------------------|

|                                                                                                                                                                                                                                                                                                                                                                   |                                                                                                              |                 |                                                                                                                                                                |                                                                  |                                                            |                                                                                               |                                               |
|-------------------------------------------------------------------------------------------------------------------------------------------------------------------------------------------------------------------------------------------------------------------------------------------------------------------------------------------------------------------|--------------------------------------------------------------------------------------------------------------|-----------------|----------------------------------------------------------------------------------------------------------------------------------------------------------------|------------------------------------------------------------------|------------------------------------------------------------|-----------------------------------------------------------------------------------------------|-----------------------------------------------|
| <p>1<br/>2<br/>3<br/>4<br/>5<br/>6<br/>7<br/>8<br/>9<br/>10<br/>11<br/>12<br/>13<br/>14<br/>15<br/>16<br/>17<br/>18<br/>19<br/>20<br/>21<br/>22<br/>23<br/>24<br/>25<br/>26<br/>27<br/>28<br/>29<br/>30<br/>31<br/>32<br/>33<br/>34<br/>35<br/>36<br/>37<br/>38<br/>39<br/>40<br/>41<br/>42<br/>43<br/>44<br/>45<br/>46<br/>47</p> <p>Sriram &amp; Khan, 2020</p> | <p>To estimate the effect of public HI programs for the poor on hospitalization s and OOP IP care costs.</p> | <p>National</p> | <p>NSS 71st round data was used n= 64270 poor individuals. -9.55% were enrolled in any PFHI - 41.3% of the poor were illiterate - 80.6% belonged to Hindu;</p> | <p>PFHI such as RSBY, ESIS, CGHS, and other state insurances</p> | <p>Treatment=enrolled HHs<br/>Control=non-enrolled HHs</p> | <p>Incidence of hospitalizations, length of hospitalization, and OOP payments for IP care</p> | <p>Cross sectional study (NSSO data 2014)</p> |
|-------------------------------------------------------------------------------------------------------------------------------------------------------------------------------------------------------------------------------------------------------------------------------------------------------------------------------------------------------------------|--------------------------------------------------------------------------------------------------------------|-----------------|----------------------------------------------------------------------------------------------------------------------------------------------------------------|------------------------------------------------------------------|------------------------------------------------------------|-----------------------------------------------------------------------------------------------|-----------------------------------------------|



1  
2  
3  
4  
5  
6  
7  
8  
9  
10  
11  
12  
13  
14  
15  
16  
17  
18  
19  
20  
21  
22  
23  
24  
25  
26  
27  
28  
29  
30  
31  
32  
33  
34  
35  
36  
37  
38  
39  
40  
41  
42  
43  
44  
45  
46  
47

|  |  |  |                                                                                                                                                                               |  |  |  |  |
|--|--|--|-------------------------------------------------------------------------------------------------------------------------------------------------------------------------------|--|--|--|--|
|  |  |  | -85.1% were<br>from the<br>disadvantaged<br>classes;<br>-64.2%<br>belonged to<br>medium<br>sized HHs (5<br>to 8<br>members)<br>-2.5%<br>suffering from<br>chronic<br>diseases |  |  |  |  |
|--|--|--|-------------------------------------------------------------------------------------------------------------------------------------------------------------------------------|--|--|--|--|

|                                  |                                                                                                                                  |                                                                                                         |                                                                                                                        |                                                           |                   |                                                                                                                                                                         |                        |
|----------------------------------|----------------------------------------------------------------------------------------------------------------------------------|---------------------------------------------------------------------------------------------------------|------------------------------------------------------------------------------------------------------------------------|-----------------------------------------------------------|-------------------|-------------------------------------------------------------------------------------------------------------------------------------------------------------------------|------------------------|
|                                  |                                                                                                                                  |                                                                                                         | - mean age of the poor population was 25.3 years.                                                                      |                                                           |                   |                                                                                                                                                                         |                        |
| Vellakkal, Juyal and Mehdi, 2012 | To assess the overall satisfaction of beneficiaries with the schemes based on self-reported patient satisfaction, willingness to | Twelve cities=Bhubaneswar, Thiruvananthapuram, Ahmedabad, Chandigarh, Meerut, Patna, Jabalpur, Lucknow, | n= 1,204 principal beneficiaries of CGHS and 640 of ECHS, 100 empaneled private healthcare providers and 100 CGHS-ECHS | CGHS and Ex-service men Contributory Health Scheme (ECHS) | Enrolment in RSBY | 1. Self-reported patient satisfaction<br>- Accessibility<br>- Environment<br>- Behavior of doctors<br>- Behavior of other staff<br>2. WTP for better quality healthcare | Cross-sectional survey |

1  
2  
3  
4  
5  
6  
7  
8  
9  
10  
11  
12  
13  
14  
15  
16  
17  
18  
19  
20  
21  
22  
23  
24  
25  
26  
27  
28  
29  
30  
31  
32  
33  
34  
35  
36  
37  
38  
39  
40  
41  
42  
43  
44  
45  
46  
47

|                                                                                                                                                                                                      |                                             |                                                                                                      |  |  |                                                                                                                                                |  |
|------------------------------------------------------------------------------------------------------------------------------------------------------------------------------------------------------|---------------------------------------------|------------------------------------------------------------------------------------------------------|--|--|------------------------------------------------------------------------------------------------------------------------------------------------|--|
| <p>pay (WTP) for better healthcare services and measuring the comprehensiveness of the schemes in terms of its ability to reduce the financial burden of healthcare expenditure on beneficiaries</p> | <p>Hyderabad, Kolkata, Mumbai and Delhi</p> | <p>officials consisting of city and dispensary level heads of CGHS and ECHS across the 12 cities</p> |  |  | <p>3.Ability of the scheme to reduce financial burden of healthcare expenditure</p> <p>4. Factors affecting level of satisfaction, and WTP</p> |  |
|------------------------------------------------------------------------------------------------------------------------------------------------------------------------------------------------------|---------------------------------------------|------------------------------------------------------------------------------------------------------|--|--|------------------------------------------------------------------------------------------------------------------------------------------------|--|

Review only

1  
2  
3 APL: Above Poverty Line; ATT: Average Treatment impact of Treatment on Treated; BPL: Below Poverty Line; CHE: Catastrophic  
4 Health Expenditure; CHIS: Comprehensive Health Insurance Scheme; CGHS: Central Government Health Scheme; DID: Difference-in-  
5 difference; ESIS: Employee State Insurance Scheme; HHs: Households; HI: Health Insurance; INR: Indian National Rupees; IP: Inpatient;  
6  
7  
8 NA: Not Applicable; NSSO: National Sample Survey Office; OOP: Out-of-Pocket; OOPE: Out-of-Pocket expenditure; OP: Out Patient; PFHI:  
9  
10 Public Funded Health Insurance; PMJAY: Prime Minister Jan Arogya Yojana; RSBY: Rasthriya Swasthy Bima Yojana; RAS: Rajiv Arogya  
11  
12 Shree; SHG: Self-Help Group; SPEC: Social, Political, Economic and Cultural; SC: Scheduled Caste; ST: Schedule Tribe; VAS: Vajpayee  
13  
14  
15 Arogya Shree; WTP: Willingness to Pay  
16  
17  
18  
19  
20  
21  
22  
23  
24  
25  
26  
27  
28  
29  
30  
31  
32  
33  
34  
35  
36  
37  
38  
39  
40  
41  
42  
43  
44  
45  
46  
47

3) Detailed synthesis of findings

Table 1: Impact of government funded health insurance on access and utilization of healthcare, financial risk protection and willingness to pay

| Study author & year                         | Study design and analysis                                                                                          | Data source and methods                                                                                                                                                                                                            | Details of health insurances                                                                                                                                                    | Results                                                                                                                                                                                                                                                                                                                                                                                                                                                         |
|---------------------------------------------|--------------------------------------------------------------------------------------------------------------------|------------------------------------------------------------------------------------------------------------------------------------------------------------------------------------------------------------------------------------|---------------------------------------------------------------------------------------------------------------------------------------------------------------------------------|-----------------------------------------------------------------------------------------------------------------------------------------------------------------------------------------------------------------------------------------------------------------------------------------------------------------------------------------------------------------------------------------------------------------------------------------------------------------|
| <b>Access and utilization of healthcare</b> |                                                                                                                    |                                                                                                                                                                                                                                    |                                                                                                                                                                                 |                                                                                                                                                                                                                                                                                                                                                                                                                                                                 |
| Azam, 2017                                  | Three large- scaled household (HH) surveys: Matching difference-in-difference analysis (MDID) of longitudinal data | Two waves of India Human Development Survey (2011-12) and (2004-2005) and Human Development Profile of India (HDPI) collected in 1993-94. Data from three states I.e. Andhra Pradesh, Karnataka and Tamil Nadu was not considered. | PFHI covered: RSBY The households having RSBY cards were considered as treatment groups and household not having RSBY cards were control groups in an RSBY implemented district | <b>Rural India</b><br>A) RSBY HHs were 3.2% points (p<0.05; SE=0.014) more likely to report any morbidity. The ATT estimates for percentage change for pre RSBY averages on RSBY household for this variable was reported as 4.84.<br>B) The difference in reporting of morbidity was more defined for long term illnesses as RSBY HHs were 5% points more likely to report any long- term morbidity (p<0.01; SE=0.015). ATT as % change of RSBY HHs was 17.70. |

|  |  |  |  |                                                                                                                                                                                                                                                                                                                                                                                                                                                                                                                                                                                                                                                                                                                                                                                                                                                                                                                                                                  |
|--|--|--|--|------------------------------------------------------------------------------------------------------------------------------------------------------------------------------------------------------------------------------------------------------------------------------------------------------------------------------------------------------------------------------------------------------------------------------------------------------------------------------------------------------------------------------------------------------------------------------------------------------------------------------------------------------------------------------------------------------------------------------------------------------------------------------------------------------------------------------------------------------------------------------------------------------------------------------------------------------------------|
|  |  |  |  | <p>C) RSBY HHs were 3.1% points (<math>p &lt; 0.05</math>; <math>SE = 0.015</math>) more likely to seek treatment for illnesses. ATT as % change of RSBY HHs was 4.93.</p> <p>D) RSBY HHs were 5.0% points (<math>p &lt; 0.05</math>; <math>SE = 0.0013</math>) more likely to seek treatment for long term illness than for short term morbidity I.e. 2.3% points (<math>p &gt; 0.05</math>; <math>SE = 0.013</math>)</p> <p>E) RSBY HHs were 0.7% points (<math>p &gt; 0.05</math>; <math>SE = 0.007</math>) more likely to report hospitalization in case of long-term morbidity.</p> <p><b>Urban India:</b></p> <p>A) RSBY HHs were 2.4% points (<math>p &gt; 0.05</math>; <math>SE = 0.026</math>) more likely to report an illness. ATT as % change for RSBY HHs was 0.033.</p> <p>B) RSBY HHs were 2.3% points (<math>p &gt; 0.05</math>; <math>SE = 0.0028</math>) more likely to report a long-term illness. ATT as % change for RSBY HHs was 7.86.</p> |
|--|--|--|--|------------------------------------------------------------------------------------------------------------------------------------------------------------------------------------------------------------------------------------------------------------------------------------------------------------------------------------------------------------------------------------------------------------------------------------------------------------------------------------------------------------------------------------------------------------------------------------------------------------------------------------------------------------------------------------------------------------------------------------------------------------------------------------------------------------------------------------------------------------------------------------------------------------------------------------------------------------------|

1  
2  
3  
4  
5  
6  
7  
8  
9  
10  
11  
12  
13  
14  
15  
16  
17  
18  
19  
20  
21  
22  
23  
24  
25  
26  
27  
28  
29  
30  
31  
32  
33  
34  
35  
36  
37  
38  
39  
40  
41  
42  
43  
44  
45  
46  
47

|                                  |                                                |                                                                                             |                                                                                          |                                                                                                                                                                                                                                                                                                                                                                                                                                                               |
|----------------------------------|------------------------------------------------|---------------------------------------------------------------------------------------------|------------------------------------------------------------------------------------------|---------------------------------------------------------------------------------------------------------------------------------------------------------------------------------------------------------------------------------------------------------------------------------------------------------------------------------------------------------------------------------------------------------------------------------------------------------------|
|                                  |                                                |                                                                                             |                                                                                          | <p>C) RSBY HHs were 2.3% points (p&gt;0.05; SE=0.026) more likely to report any treatment. ATT as % change for RSBY HHs was 3.93.</p> <p>D) RSBY HHs were 1.5% points (p.0.05; SE=5.13) more likely to report treatment for long-term morbidity. ATT as %change for RSBY HHs was 5.13)</p> <p>E) RSBY HHs were 1.6% points (p&gt;0.05; SE=0.014) more likely to report hospitalization for a long-term morbidity. ATT as % change for RSBY HHs was 35.80)</p> |
| <b>Dror &amp; Vellakka, 2012</b> | Analysis of the cross sectional RSBY 2011 data | Main data sources were RSBY website and the planning commission of India official documents | PFHI covered: RSBY RSBY health insurance Comparison with the 2004 utilization indicators | Hospitalization rate for the lowest income group in the country was 1.24 percent in 2004 (according to the NSSO survey), this was juxtaposed with the utilization rate of 2.09 % for RSBY beneficiaries in 2011. On comparison it was a growth rate of 69% was observed, which suggests beneficial results of the RSBY scheme.                                                                                                                                |

|                                                        |                                                                                |                                                                                                                                                                                                                                                                                                                         |                                                                                                                                                                                                                                                                                                                                           |                                                                                                                                                                                                                                                                                                                                                                                                                                                                                                                                                                                                                                                                                                                                                                                          |
|--------------------------------------------------------|--------------------------------------------------------------------------------|-------------------------------------------------------------------------------------------------------------------------------------------------------------------------------------------------------------------------------------------------------------------------------------------------------------------------|-------------------------------------------------------------------------------------------------------------------------------------------------------------------------------------------------------------------------------------------------------------------------------------------------------------------------------------------|------------------------------------------------------------------------------------------------------------------------------------------------------------------------------------------------------------------------------------------------------------------------------------------------------------------------------------------------------------------------------------------------------------------------------------------------------------------------------------------------------------------------------------------------------------------------------------------------------------------------------------------------------------------------------------------------------------------------------------------------------------------------------------------|
| <p><b>Garg, Chowdhury &amp; Sundararaman, 2019</b></p> | <p>Secondary data analysis of the two rounds of NSS cross-sectional survey</p> | <p>The 60<sup>th</sup> round of NSSO (2004) and 71<sup>st</sup> round of NSSO (2014) in three states of Andhra Pradesh, Karnataka and Tamil Nadu. Instrument Variable (IV) method was used in the multivariate analysis. Two-step least square (2sls) for OOPE and Two-step IV Probit model for utilization and CHE</p> | <p>PFHI covered: The three Public Funded Health Insurance (PFHI) Schemes operational in Andhra Pradesh (Rajiv Arogya Shree or the NTR Vaidya Seva); Karnataka (Vajpayee Arogya Shree); Tamil Nadu (Tamil Nadu Chief Minister's Comprehensive Health Insurance Scheme) The pre PFHI in 2004 and post PFHI (2014) comparisons were made</p> | <p><b>A) Proportion of people being hospitalized increased from 2004 to 2014, among both enrolled and non-enrolled members, in all the three states:</b></p> <p><b>Proportion (%) of individuals who utilized hospital care:</b></p> <p><b>Andhra Pradesh</b></p> <p>2004: All the people 2.29 (95% CI=2.09–2.49)<br/>2014: All the people 5.58 (95% CI=5.14–6.01); non-insured individuals 5.86 (95% CI=5.18–6.53); PFHI enrolled individuals 5.41 (95% CI=4.84–5.99)</p> <p><b>Karnataka</b></p> <p>2004: All the people 2.23 (95% CI=2.01–2.46)<br/>2014: All the people 4.93 (95% CI=4.58–5.28); non-insured individuals 4.88 (95% CI=4.53–5.24); PFHI enrolled individuals 5.76 (95% CI=4.08–7.43)</p> <p><b>Tamil Nadu</b></p> <p>2004: All the people 3.58 (95% CI=3.33–3.83)</p> |
|--------------------------------------------------------|--------------------------------------------------------------------------------|-------------------------------------------------------------------------------------------------------------------------------------------------------------------------------------------------------------------------------------------------------------------------------------------------------------------------|-------------------------------------------------------------------------------------------------------------------------------------------------------------------------------------------------------------------------------------------------------------------------------------------------------------------------------------------|------------------------------------------------------------------------------------------------------------------------------------------------------------------------------------------------------------------------------------------------------------------------------------------------------------------------------------------------------------------------------------------------------------------------------------------------------------------------------------------------------------------------------------------------------------------------------------------------------------------------------------------------------------------------------------------------------------------------------------------------------------------------------------------|



1  
2  
3  
4  
5  
6  
7  
8  
9  
10  
11  
12  
13  
14  
15  
16  
17  
18  
19  
20  
21  
22  
23  
24  
25  
26  
27  
28  
29  
30  
31  
32  
33  
34  
35  
36  
37  
38  
39  
40  
41  
42  
43  
44  
45  
46  
47

|  |  |  |  |                                                                                                                                                                                                                                                                                                                                                                                                                                                                                                                                                                                                                                                                            |
|--|--|--|--|----------------------------------------------------------------------------------------------------------------------------------------------------------------------------------------------------------------------------------------------------------------------------------------------------------------------------------------------------------------------------------------------------------------------------------------------------------------------------------------------------------------------------------------------------------------------------------------------------------------------------------------------------------------------------|
|  |  |  |  | <p>2014: All the people 5.68 (95% CI=5.32–6.04); non-insured individuals 5.55 (95% CI=5.16–5.94); PFHI enrolled individuals 6.27 (95%CI=5.38–7.17)</p> <p><b>B) Proportion (%) of hospitalization episodes in private hospitals</b></p> <p><b>Andhra Pradesh</b></p> <p>2004: PFHI enrolled (NA); not enrolled 70 (95% CI=68-72)</p> <p>2014: PFHI enrolled 71 (95%CI=68–73); not enrolled 80 (95%CI=77–82)</p> <p><b>Karnataka</b></p> <p>2004: PFHI enrolled (NA); not enrolled 65 (95%CI=62–67)</p> <p>2014: PFHI enrolled 70 (95%CI=63–76); not enrolled 68 (95%CI=66–70)</p> <p><b>Tamil Nadu</b></p> <p>2004: PFHI enrolled (NA); not enrolled 61 (95% CI=59–63)</p> |
|--|--|--|--|----------------------------------------------------------------------------------------------------------------------------------------------------------------------------------------------------------------------------------------------------------------------------------------------------------------------------------------------------------------------------------------------------------------------------------------------------------------------------------------------------------------------------------------------------------------------------------------------------------------------------------------------------------------------------|

For peer review only

|    |  |  |  |                                                           |
|----|--|--|--|-----------------------------------------------------------|
| 1  |  |  |  | 2014: PFHI enrolled 67 (95% CI=63–70); not enrolled       |
| 2  |  |  |  | 61 (95% CI=59–62)                                         |
| 3  |  |  |  | <b>C) Association of PFHI enrolment and increase in</b>   |
| 4  |  |  |  | <b>hospitalization (utilization) using</b>                |
| 5  |  |  |  | <b>IV Probit regression</b>                               |
| 6  |  |  |  | <b>Andhra Pradesh:</b> coef. -0.085 (SE= 0.526; 95% CI= - |
| 7  |  |  |  | 1.116 to 0.947)                                           |
| 8  |  |  |  | <b>Karnataka:</b> coef. 1.378 (SE= 1.336; 95% CI= -1.242  |
| 9  |  |  |  | to 3.997)                                                 |
| 10 |  |  |  | <b>Tamil Nadu:</b> coef. -0.130(SE= 1.398; 95% CI= -2.871 |
| 11 |  |  |  | to 2.611)                                                 |
| 12 |  |  |  | Enrolment under PFHI was not associated with              |
| 13 |  |  |  | increase in utilization in any of the three states        |
| 14 |  |  |  | <b>D) Association between PFHI enrolment and</b>          |
| 15 |  |  |  | <b>hospitalization or utilization using</b>               |
| 16 |  |  |  | <b>naive Probit model</b>                                 |
| 17 |  |  |  | <b>Andhra Pradesh=</b> -0.025 (p>0.05)                    |
| 18 |  |  |  | <b>Karnataka:</b> 0.191 (p<0.001)                         |
| 19 |  |  |  |                                                           |
| 20 |  |  |  |                                                           |
| 21 |  |  |  |                                                           |
| 22 |  |  |  |                                                           |
| 23 |  |  |  |                                                           |
| 24 |  |  |  |                                                           |
| 25 |  |  |  |                                                           |
| 26 |  |  |  |                                                           |
| 27 |  |  |  |                                                           |
| 28 |  |  |  |                                                           |
| 29 |  |  |  |                                                           |
| 30 |  |  |  |                                                           |
| 31 |  |  |  |                                                           |
| 32 |  |  |  |                                                           |
| 33 |  |  |  |                                                           |
| 34 |  |  |  |                                                           |
| 35 |  |  |  |                                                           |
| 36 |  |  |  |                                                           |
| 37 |  |  |  |                                                           |
| 38 |  |  |  |                                                           |
| 39 |  |  |  |                                                           |
| 40 |  |  |  |                                                           |
| 41 |  |  |  |                                                           |
| 42 |  |  |  |                                                           |
| 43 |  |  |  |                                                           |
| 44 |  |  |  |                                                           |
| 45 |  |  |  |                                                           |
| 46 |  |  |  |                                                           |
| 47 |  |  |  |                                                           |

|                  |                                                                                                                                                                                                                                                     |                                                                                                                                                                                                                                                                                                                                                                                    |                                                                                                                                                          |                                                                                                                                                                                                                                                                                                                                                                                                        |
|------------------|-----------------------------------------------------------------------------------------------------------------------------------------------------------------------------------------------------------------------------------------------------|------------------------------------------------------------------------------------------------------------------------------------------------------------------------------------------------------------------------------------------------------------------------------------------------------------------------------------------------------------------------------------|----------------------------------------------------------------------------------------------------------------------------------------------------------|--------------------------------------------------------------------------------------------------------------------------------------------------------------------------------------------------------------------------------------------------------------------------------------------------------------------------------------------------------------------------------------------------------|
|                  |                                                                                                                                                                                                                                                     |                                                                                                                                                                                                                                                                                                                                                                                    |                                                                                                                                                          | <b>Tamil Nadu:</b> $-0.022$ ( $p>0.05$ )<br><br>Significant association between PFHI enrolment and hospitalizations seen only in Karnataka                                                                                                                                                                                                                                                             |
| <b>Garg 2020</b> | Impact evaluation using NSS survey 2004 when there was no PFHI, and 2014 data (for older PFHI scheme) and primary household survey in 2019 (for data related to the effect of first year of implementing PMJAY) in the state of Chhattisgarh, India | NSS survey data<br><br>Multivariate analysis to see the effect of PMJAY on utilization CHE and OOPE<br><br>OLS model for continuous outcome available and Probit model for binary outcome variable.<br><br>Compared with ATT under Propensity Score Matching or PSM<br><br>Multivariate analysis was repeated for OOPE and CHE using IV approach.<br><br>For OOPE 2sls was applied | PFHI covered: PMJAY scheme introduced in the year 2018.<br><br>The study also mentions other PFHI schemes like MSBY and RSBY operational in Chhattisgarh | The utilization of hospital care did not increase with enrolment under PMJAY or other PFHI schemes in Chhattisgarh.<br><br><b>Proportion (%) of individuals in Chhattisgarh who utilized hospital care</b><br><br>In 2019, PFHI-enrolled= 6.0 (95% CI 5.6–6.5) and PFHI not enrolled 5.7 (95% CI 5.1–6.4)<br><br>In 2014, PFHI-enrolled 3.3 (95% CI 2.6–4.0) and PFHI not enrolled 2.9 (95%CI 2.3–3.4) |

|                                |                                                                               |                                                                                                                                                                                                                                                               |                                                                                                                              |                                                                                                                                                                                                                                                                                                                                                                                                                                                                                                                                                              |
|--------------------------------|-------------------------------------------------------------------------------|---------------------------------------------------------------------------------------------------------------------------------------------------------------------------------------------------------------------------------------------------------------|------------------------------------------------------------------------------------------------------------------------------|--------------------------------------------------------------------------------------------------------------------------------------------------------------------------------------------------------------------------------------------------------------------------------------------------------------------------------------------------------------------------------------------------------------------------------------------------------------------------------------------------------------------------------------------------------------|
|                                |                                                                               | as IV model, and for CHE                                                                                                                                                                                                                                      |                                                                                                                              |                                                                                                                                                                                                                                                                                                                                                                                                                                                                                                                                                              |
|                                |                                                                               | two step IV Probit was                                                                                                                                                                                                                                        |                                                                                                                              |                                                                                                                                                                                                                                                                                                                                                                                                                                                                                                                                                              |
|                                |                                                                               | applied                                                                                                                                                                                                                                                       |                                                                                                                              |                                                                                                                                                                                                                                                                                                                                                                                                                                                                                                                                                              |
| <b>Ghosh &amp; Gupta, 2017</b> | Impact evaluation: Coarsened exact matching and, linear and logit regression. | National Sample Survey data: 18 states, which do not have additional state funded insurance (round not reported). States having specific PFHIs, union territories not exposed to RSBY and states not having functional RSBY in the year 2014-15 were excluded | PFHI covered: RSBY<br>Treated group: Household having at least one person enrolled in RSBY. Control: households with no RSBY | 1) The effect of the RSBY on <b>number of outpatient (OP) care</b> was statistically insignificant i.e. sample average treatment effect for the treated (SATT)= -0.012 (p= 0.852).<br><br>2) Impact of RSBY on <b>number of inpatient (IP) care</b> utilization was significant i.e., SATT= 0.109 (p= 0.023).<br>This was approximated as 59% increase when compared to mean inpatient utilization by the uninsured families I.e. (0.186)<br><br>3) No significant impact of RSBY on <b>length of stay at hospitals</b> (in days) i.e., SATT=0.071 (p=0.952) |

1  
2  
3  
4  
5  
6  
7  
8  
9  
10  
11  
12  
13  
14  
15  
16  
17  
18  
19  
20  
21  
22  
23  
24  
25  
26  
27  
28  
29  
30  
31  
32  
33  
34  
35  
36  
37  
38  
39  
40  
41  
42  
43  
44  
45  
46  
47

|                                   |                                                                                                                          |                                                                                                                |                                                                                                                                                                                               |                                                                                                                                                                                                                                                                                                                                                                                                                                                                                                                                                                                                                                                        |
|-----------------------------------|--------------------------------------------------------------------------------------------------------------------------|----------------------------------------------------------------------------------------------------------------|-----------------------------------------------------------------------------------------------------------------------------------------------------------------------------------------------|--------------------------------------------------------------------------------------------------------------------------------------------------------------------------------------------------------------------------------------------------------------------------------------------------------------------------------------------------------------------------------------------------------------------------------------------------------------------------------------------------------------------------------------------------------------------------------------------------------------------------------------------------------|
| <p><b>Katyal et al., 2015</b></p> | <p>A retrospective, longitudinal, controlled quasi-experimental Study (Two large surveys): Difference-in-differences</p> | <p>Pre-post intervention effect: Pre-intervention NSSO 2004 survey and post intervention NSSO 2012 survey.</p> | <p>PFHI covered: RAS and RSBY<br/>No. Of HHs:<br/><b>Intervention 1:</b> RAS of AP in 2004: 0559 and 2012: 8623.<br/><b>Intervention 2:</b> RSBY of MH in 2004: 5314 &amp; in 2012: 10073</p> | <p><b>1) Access to IP care</b> (DID mean (95% CI), p) RAS of AP compared to RSBY of MH:<br/><b>In Private hospitals:</b><br/><b>a) Overall:</b> [Mean DID: 0.076 (-0.012:0.14) p=0.02] AP as compared to MH. Utilization of private hospitals has increased in AP [0.065 (0.018:0.11)] and decreased in MH [-0.011(-0.032:0.053)]<br/><b>b) Place of residence:</b><br/>Urban: The likelihood of admission to a private hospital was significant for hospitalizations among urban households [0.21 (0.095:0.31) p=0.0002] in AP as compared to MH.<br/>Rural: DID=-0.0019 (-0.080:0.076) p=0.96 AP compared to MH.<br/><b>In Public hospitals:</b></p> |
|-----------------------------------|--------------------------------------------------------------------------------------------------------------------------|----------------------------------------------------------------------------------------------------------------|-----------------------------------------------------------------------------------------------------------------------------------------------------------------------------------------------|--------------------------------------------------------------------------------------------------------------------------------------------------------------------------------------------------------------------------------------------------------------------------------------------------------------------------------------------------------------------------------------------------------------------------------------------------------------------------------------------------------------------------------------------------------------------------------------------------------------------------------------------------------|

|  |  |  |  |                                                                                                                                                                                                                                                                                                                                                                                                                                                                                                                                                                                                                                                                                                                                                                                                       |
|--|--|--|--|-------------------------------------------------------------------------------------------------------------------------------------------------------------------------------------------------------------------------------------------------------------------------------------------------------------------------------------------------------------------------------------------------------------------------------------------------------------------------------------------------------------------------------------------------------------------------------------------------------------------------------------------------------------------------------------------------------------------------------------------------------------------------------------------------------|
|  |  |  |  | <p>a) The overall utilization of public facilities has reduced in both the states and more so in AP [-0.075 (-0.14:0.0125), p= 0.019]</p> <p>b) <b>Place of residence:</b></p> <p>Urban: There was an increase in utilization of public facilities in MH [0.067 (-0.062:0.12)] and a reduction in AP [-0.14 (-0.23:-0.047)] for urban HHs and the DID of AP to that of MH is [-0.2 (-0.31:-0.095) p=0.0002].</p> <p>Rural: DID: 0.0019 (-0.076:0.08) p=0.96] AP compared to MH.</p> <p><b>2) Duration (days) of hospital stay:</b></p> <p><b>In Private hospitals:</b></p> <p>DID analysis: an average reduction of 3.2 (-5.4, -1.2) days in AP compared to MH</p> <p>Place of residence: rural HHs [-3.7 (-6.3 :-1) p=0.007]and urban: -1.8 (-4.4:0.8) p=0.17</p> <p><b>In Public hospitals:</b></p> |
|--|--|--|--|-------------------------------------------------------------------------------------------------------------------------------------------------------------------------------------------------------------------------------------------------------------------------------------------------------------------------------------------------------------------------------------------------------------------------------------------------------------------------------------------------------------------------------------------------------------------------------------------------------------------------------------------------------------------------------------------------------------------------------------------------------------------------------------------------------|

1  
2  
3  
4  
5  
6  
7  
8  
9  
10  
11  
12  
13  
14  
15  
16  
17  
18  
19  
20  
21  
22  
23  
24  
25  
26  
27  
28  
29  
30  
31  
32  
33  
34  
35  
36  
37  
38  
39  
40  
41  
42  
43  
44  
45  
46  
47

|                                           |                                                                                                                                         |                                                                                                                                                                                                                             |                                                                                                                                                                                           |                                                                                                                                                                                                                                                                                                                            |
|-------------------------------------------|-----------------------------------------------------------------------------------------------------------------------------------------|-----------------------------------------------------------------------------------------------------------------------------------------------------------------------------------------------------------------------------|-------------------------------------------------------------------------------------------------------------------------------------------------------------------------------------------|----------------------------------------------------------------------------------------------------------------------------------------------------------------------------------------------------------------------------------------------------------------------------------------------------------------------------|
|                                           |                                                                                                                                         |                                                                                                                                                                                                                             |                                                                                                                                                                                           | Overall: DID: -2 (-5.1:1.1) p=0.2 AP compared to MH<br><br>Rural: average of reduction of 4.2 days [(-9:0.6) p=0.09] in AP compared to MH.<br><br>Urban: 0.7 (-1.8:3.2) p=0.59 in AP compared to MH.                                                                                                                       |
| <b>Mahapatro, Singh &amp; Singh, 2018</b> | Analysis of the 71 <sup>st</sup> round of cross-sectional household NSS 2014 survey<br><br>Bivariate and multivariate analysis was done | -71 <sup>st</sup> round National Sample Survey, 2014, 'Social Consumption: Health' Schedule 25.0<br><br>-To examine the impact of health insurance on OOP payment, two-part model was used (part 1 logit and part 2 linear) | PFHI covered: Any PFHI scheme<br><br>Information of hospitalization during 365 days was used for the analysis.<br><br>For association comparisons were made between insured and uninsured | <b>1) Inpatient rate by type of health insurance</b><br><br>Government health insurance: lowest economic class: 4% and High economic class 9%<br><br>Other health insurance: lowest economic class: 4.4% and High economic class 6.4%<br><br>No health insurance: lowest economic class: 3.8% and High economic class 6.2% |

|                                                                                                                                                                                                                                                                                                                                                                                                 |                                                                  |                                                                                                                                                                                                                                                                                                                                                           |                                                                                                                             |                                                                                                                                                                                                                                                                                                                                                                                                                                                                                                                                                                                                                                                                                                              |
|-------------------------------------------------------------------------------------------------------------------------------------------------------------------------------------------------------------------------------------------------------------------------------------------------------------------------------------------------------------------------------------------------|------------------------------------------------------------------|-----------------------------------------------------------------------------------------------------------------------------------------------------------------------------------------------------------------------------------------------------------------------------------------------------------------------------------------------------------|-----------------------------------------------------------------------------------------------------------------------------|--------------------------------------------------------------------------------------------------------------------------------------------------------------------------------------------------------------------------------------------------------------------------------------------------------------------------------------------------------------------------------------------------------------------------------------------------------------------------------------------------------------------------------------------------------------------------------------------------------------------------------------------------------------------------------------------------------------|
| <p>1<br/>2<br/>3<br/>4<br/>5<br/>6<br/>7<br/>8<br/>9<br/>10<br/>11<br/>12<br/>13<br/>14<br/>15<br/>16<br/>17<br/>18<br/>19<br/>20<br/>21<br/>22<br/>23<br/>24<br/>25<br/>26<br/>27<br/>28<br/>29<br/>30<br/>31<br/>32<br/>33<br/>34<br/>35<br/>36<br/>37<br/>38<br/>39<br/>40<br/>41<br/>42<br/>43<br/>44<br/>45<br/>46<br/>47</p> <p><b>Nandi,<br/>Schneider<br/>&amp; Dixit,<br/>2017</b></p> | <p>Secondary data, multi<br/>variate logistic<br/>regression</p> | <p>NSSO, the Chhattisgarh<br/>State data used in this study<br/>were extracted from the<br/>25th schedule of the 71st<br/>round of the cross-sectional<br/>Indian National Sample<br/>Survey, conducted between<br/>January and June 2014<br/>The Chhattisgarh sample<br/>included 1205 house- holds<br/>and 6026 individuals<br/>(household members)</p> | <p>PFHI covered: Government<br/>funded health insurance<br/>schemes in Chhattisgarh<br/>viz. RSBY, MSBY, ESIS,<br/>CGHS</p> | <p><b>Hospitalization:</b><br/>AOR (95% CI), N= 5977<br/>-A person with insurance was significantly more likely<br/>to be hospitalized compared to a person with no<br/>insurance (AOR 1.388; 95% CI: 1.190–1.620).<br/>-Women (AOR1.80;95%CI:1.252.58), Scheduled<br/>Tribes and the poorest(Q1) were significantly more<br/>likely to be hospitalized in the public sector than men,<br/>other social groups and other UMPCE groups<br/>respectively.<br/>-Taking infection as the reference group, conditions<br/>like<br/>cancer (AOR0.11;95%CI:0.01–0.94) and respiratory<br/>conditions (AOR0.30;95%CI:0.09–0.97) were<br/>significantly less likely causes of admission in the<br/>public sector,</p> |
|-------------------------------------------------------------------------------------------------------------------------------------------------------------------------------------------------------------------------------------------------------------------------------------------------------------------------------------------------------------------------------------------------|------------------------------------------------------------------|-----------------------------------------------------------------------------------------------------------------------------------------------------------------------------------------------------------------------------------------------------------------------------------------------------------------------------------------------------------|-----------------------------------------------------------------------------------------------------------------------------|--------------------------------------------------------------------------------------------------------------------------------------------------------------------------------------------------------------------------------------------------------------------------------------------------------------------------------------------------------------------------------------------------------------------------------------------------------------------------------------------------------------------------------------------------------------------------------------------------------------------------------------------------------------------------------------------------------------|



1  
2  
3  
4  
5  
6  
7  
8  
9  
10  
11  
12  
13  
14  
15  
16  
17  
18  
19  
20  
21  
22  
23  
24  
25  
26  
27  
28  
29  
30  
31  
32  
33  
34  
35  
36  
37  
38  
39  
40  
41  
42  
43  
44  
45  
46  
47

|                                                                  |                                                                                                                                                                                                                                                                                   |                                                                                                                                                                                                                                                                                                                    |                                                                                                                                                                                                                |                                                                                                                                                                                                                                                                                                                                                                                                                                                                                                                                                                                  |
|------------------------------------------------------------------|-----------------------------------------------------------------------------------------------------------------------------------------------------------------------------------------------------------------------------------------------------------------------------------|--------------------------------------------------------------------------------------------------------------------------------------------------------------------------------------------------------------------------------------------------------------------------------------------------------------------|----------------------------------------------------------------------------------------------------------------------------------------------------------------------------------------------------------------|----------------------------------------------------------------------------------------------------------------------------------------------------------------------------------------------------------------------------------------------------------------------------------------------------------------------------------------------------------------------------------------------------------------------------------------------------------------------------------------------------------------------------------------------------------------------------------|
|                                                                  |                                                                                                                                                                                                                                                                                   |                                                                                                                                                                                                                                                                                                                    |                                                                                                                                                                                                                | <p>obstetric and childbirth-related conditions were significantly more likely in the public sector (AOR1.63;95%CI:1.03–2.57).</p> <p>-Enrolment in government insurance was associated with hospitalization in the public sector at 90% Confidence Levels (AOR1.32;90%CI:1.01–1.72)</p>                                                                                                                                                                                                                                                                                          |
| <p><b>Philip, Kan</b><br/><b>nan,</b><br/><b>Sarma, 2017</b></p> | <p>A comparative cross-sectional survey</p> <p>The demographic and socioeconomic characteristics and health care utilization of insured and uninsured households were compared using Pearson’s <math>\chi^2</math> test.</p> <p>Multivariate logistic regression analysis was</p> | <p>Using generalized estimating equations, the correlates of inpatient service utilization of individuals were estimated. The models were built by the method of iterative backward elimination and forward selection because the study did not use any conceptual framework, and it aimed at exploration. The</p> | <p>PFHI covered: CHIS of Kerala</p> <p>A total of 149 insured and 147 uninsured households, with 667 and 578 members, respectively, were included in the study conducted in Trivandrum district of Kerala.</p> | <p>-Overall Outpatient service utilization: 29.1% and</p> <p>-Overall Inpatient service utilization: 38.5%.</p> <p>-The utilization of outpatient services among insured (31.5%) and uninsured (26.5%) households; <math>P = 0.342</math>, statistically not significant at 95% CI.</p> <p>-The inpatient service utilization (insured, 44.3%; uninsured, 32.7%) with a <math>P</math> value of .04, statistically significant difference at 95% CI.</p> <p>-Inpatient service utilization among insured participants compared to noninsured (OR = 1.57; 95% CI = 1.05-2.34)</p> |

|                                   |                                                           |                                                                                                                           |                                                                              |                                                                                                                                                                                                                                                                                                                                                                                                                                                                                                                                                                                              |
|-----------------------------------|-----------------------------------------------------------|---------------------------------------------------------------------------------------------------------------------------|------------------------------------------------------------------------------|----------------------------------------------------------------------------------------------------------------------------------------------------------------------------------------------------------------------------------------------------------------------------------------------------------------------------------------------------------------------------------------------------------------------------------------------------------------------------------------------------------------------------------------------------------------------------------------------|
|                                   | <p>used to derive the predictors of insurance status.</p> | <p>Mann-Whitney <i>U</i> test was used to compare the expenditure associated with inpatient care between the 2 groups</p> |                                                                              | <p>-Insurance status was found to be a significant correlate for inpatient service utilization after adjusting for age, sex, and chronic diseases</p> <p>-Generalized estimating equations for inpatient services (95% CI)</p> <ul style="list-style-type: none"> <li>○ Age (0-5 reference category):</li> <li>○ 6-15 y: OR 4.0 (0.5-30.4), p=0.176</li> <li>○ 16-45 y: OR: 2.0 (1.0-4.2), p=0.060</li> <li>○ &gt;45 y: OR: 1.9 (1.3-3.0), p=.002</li> <li>○ Gender (Male/female): OR 1.5 (0.9-2.4) p=0.084</li> <li>○ Preexisting chronic disease: OR (0.5 0.3-0.7), p= &lt;.001</li> </ul> |
| <p><b>Ranjan et al., 2018</b></p> | <p>Analysis of a cross-sectional survey</p>               | <p>-Data from the 71<sup>st</sup> round of NSSO survey I.e. ‘Social Consumption: Health’ survey</p>                       | <p>PFHI covered: Public Funded Health Insurance (PFHI) schemes e.g. RSBY</p> | <p><b>1) Percentage of total hospitalization cases according to insurance coverage</b></p> <p>A) Rural<br/>With government insurance</p>                                                                                                                                                                                                                                                                                                                                                                                                                                                     |

1  
2  
3  
4  
5  
6  
7  
8  
9  
10  
11  
12  
13  
14  
15  
16  
17  
18  
19  
20  
21  
22  
23  
24  
25  
26  
27  
28  
29  
30  
31  
32  
33  
34  
35  
36  
37  
38  
39  
40  
41  
42  
43  
44  
45  
46  
47

|  |  |                                                                                                                         |  |                                                                                                                                                                                                                                                                                                                                                                                                                                                                                                                                                                                                                                                                                        |
|--|--|-------------------------------------------------------------------------------------------------------------------------|--|----------------------------------------------------------------------------------------------------------------------------------------------------------------------------------------------------------------------------------------------------------------------------------------------------------------------------------------------------------------------------------------------------------------------------------------------------------------------------------------------------------------------------------------------------------------------------------------------------------------------------------------------------------------------------------------|
|  |  | <p>-Propensity score matching (PSM) for the effectiveness of PFHIs and multiple logistic regression for association</p> |  | <p>All=49.8%; Poorest= 79.0%; Poor= 62.7%; Middle= 56.8%; Rich= 40.2%; Richest= 34.3%</p> <p>Without government insurance</p> <p>All= 50.8%; Poorest= 67.7%; Poor= 61.7%; Middle= 52.6%; Rich= 47.4%; Richest= 29.1%</p> <p>B) Urban</p> <p>With government insurance</p> <p>All= 40.4%; Poorest= 57.6%; Poor= 47.8%; Middle= 38.6%; Rich= 35.5%; Richest= 24.4%</p> <p>Without government insurance</p> <p>All= 36.1%; Poorest= 51.6%; Poor= 42.0%; Middle= 33.6%; Rich= 23.3%; Richest= 16.2%</p> <p><b>2) Hospitalization rate per 100 population</b></p> <p>For government insurance= 5.4%; No insurance=4.2%</p> <p><b>3) Factors effecting likelihood of hospitalization</b></p> |
|--|--|-------------------------------------------------------------------------------------------------------------------------|--|----------------------------------------------------------------------------------------------------------------------------------------------------------------------------------------------------------------------------------------------------------------------------------------------------------------------------------------------------------------------------------------------------------------------------------------------------------------------------------------------------------------------------------------------------------------------------------------------------------------------------------------------------------------------------------------|

|                                                                                                                                                                                                                                                                               |                         |                                                                                                 |                                                                                                                                                                                                        |                                                                                                                                                                                                                                                                                                                                    |                                                                                                                                                                                                                                                                                                                                                                                                                                                                                                                                                                                                                                                                                                              |
|-------------------------------------------------------------------------------------------------------------------------------------------------------------------------------------------------------------------------------------------------------------------------------|-------------------------|-------------------------------------------------------------------------------------------------|--------------------------------------------------------------------------------------------------------------------------------------------------------------------------------------------------------|------------------------------------------------------------------------------------------------------------------------------------------------------------------------------------------------------------------------------------------------------------------------------------------------------------------------------------|--------------------------------------------------------------------------------------------------------------------------------------------------------------------------------------------------------------------------------------------------------------------------------------------------------------------------------------------------------------------------------------------------------------------------------------------------------------------------------------------------------------------------------------------------------------------------------------------------------------------------------------------------------------------------------------------------------------|
|                                                                                                                                                                                                                                                                               |                         |                                                                                                 |                                                                                                                                                                                                        | Insurance (irrespective of the type of insurance) OR= 1.06 (95% CI= 0.98 to 1.14)                                                                                                                                                                                                                                                  |                                                                                                                                                                                                                                                                                                                                                                                                                                                                                                                                                                                                                                                                                                              |
| 1<br>2<br>3<br>4<br>5<br>6<br>7<br>8<br>9<br>10<br>11<br>12<br>13<br>14<br>15<br>16<br>17<br>18<br>19<br>20<br>21<br>22<br>23<br>24<br>25<br>26<br>27<br>28<br>29<br>30<br>31<br>32<br>33<br>34<br>35<br>36<br>37<br>38<br>39<br>40<br>41<br>42<br>43<br>44<br>45<br>46<br>47 | <b>Rao et al., 2014</b> | A difference-in-differences (DID) using repeated cross-sectional surveys with parallel control. | NSSO 2004 survey, A total of 5314 and 5059 households from Maharashtra (MH) and Andhra Pradesh (AP) were surveyed by the NSSO in 2004 and Survey in 2012 included 10073 (MH) and 8623 (AP) households. | PFHI covered: RSBY and Arogyashree<br>Two cross-sectional surveys: as a baseline, the data from the NSSO 2004 survey collected before the Aarogyasri and RSBY schemes were launched; and as post-intervention, a survey using the same methodology conducted in 2012.<br>A survey of 18 696 HHs across 2 states and 1871 locations | <b>Hospitalization rates</b> (inpatient care): (number of individuals hospitalized during the previous year, per 1000 population): DID mean (95% CI) for both the states, Adjusted for co-variables 0.7 (-8.6 to 10.2), p value: 0.8685.<br>1.Gender: Hospitalization rates increased for both genders but statistically significant for female headed HHs (DID mean=27.6, 95% CI 1.1 to 54.1, p=0.0415)<br>2.Social class: Schedule tribe: DID mean: -19.8 (95% CI: -37.3 to -2.3) p=0.0272, for other social groups (SC, other excluded groups and all groups) it was not significant<br>3.Quintile: Poorest: DID mean: -14.4 (95% CI: -28 to -0.31) p=0.0451, for other quintiles it was not significant. |

|                                              |                                                                                                     |                                                                                                                                                                                                                                             |                                                                                                                                                                                                        |                                                                                                                                                                                                                                                                                                                                                                                                                                                                                                                                                          |
|----------------------------------------------|-----------------------------------------------------------------------------------------------------|---------------------------------------------------------------------------------------------------------------------------------------------------------------------------------------------------------------------------------------------|--------------------------------------------------------------------------------------------------------------------------------------------------------------------------------------------------------|----------------------------------------------------------------------------------------------------------------------------------------------------------------------------------------------------------------------------------------------------------------------------------------------------------------------------------------------------------------------------------------------------------------------------------------------------------------------------------------------------------------------------------------------------------|
| <p><b>Raza, van de Poel, Panda, 2016</b></p> | <p>Two cross sectional surveys among SHG members themselves or the head of the (households) HHs</p> | <p>Primary study: Baseline survey: March and May 2010 (3,686 HHs) and follow-up survey: March and April in 2012 (3,318 HHs) and 2013 (3307 HHs). Location: Kanpur Dehat and Pratapgarh districts in Uttar Pradesh and Vaishali in Bihar</p> | <p>PFHI covered: RSBY</p>                                                                                                                                                                              | <p><b>Probability of hospitalizations:</b> RSBY membership is not significantly associated with the likelihood of hospitalization [<b>Pooled:</b> 0.000 (SE:0.010) n=10,125, <b>UP:</b> -0.010 (0.013), n= 6359; <b>Bihar:</b> 0.015 (0.017), n=3766] or the likelihood of positive spending within a HH, the latter most likely related to high likelihood of having expenses at baseline.<br/><br/><b>Sensitivity analysis</b> by restricting the sample to households in the bottom two asset tertiles: Not significant for pooled, UP and Bihar.</p> |
| <p><b>Sood and Wagner et al, 2016</b></p>    | <p>Quasi experimental design<br/><br/>Logistic regression</p>                                       | <p>3478 households in 300 villages where VAS was implemented and 3486 households in 272 neighboring matched villages ineligible for VAS.<br/><br/>Total 572 villages</p>                                                                    | <p>PFHI covered: VAS<br/><br/>A government insurance programme that provided free tertiary care to households below the poverty line in half of villages in Karnataka from February 2010 to August</p> | <p>1) Treatment-seeking behavior:<br/>Households eligible for VAS were 4.4 percentage points (95% CI 0.7 to 8.2; 6.76% increase; p=0.022) more likely to seek treatment for their symptoms<br/><br/>For symptoms associated with cardiac conditions, the increase in treatment seeking was more pronounced and more statistically significant at 4.38 percentage points (95% CI 0.1 to 8.7; 7.04% increase;</p>                                                                                                                                          |

|  |  |  |                                                                  |                                                                                                                                                                                                                                                                                                                                                                                                                                                                                                                                                                                                                                                                                                                                                                                                 |
|--|--|--|------------------------------------------------------------------|-------------------------------------------------------------------------------------------------------------------------------------------------------------------------------------------------------------------------------------------------------------------------------------------------------------------------------------------------------------------------------------------------------------------------------------------------------------------------------------------------------------------------------------------------------------------------------------------------------------------------------------------------------------------------------------------------------------------------------------------------------------------------------------------------|
|  |  |  | <p>2012. VAS eligible villages and VAS non-eligible villages</p> | <p>p=0.046); non-cardiac symptoms at 3.92 percentage points (6.4%, p=0.085).</p> <p>A) Any symptoms/ Symptoms-cardiac conditions/Symptoms of non-cardiac condition</p> <ul style="list-style-type: none"> <li>- VAS eligible HHs, n=2250, 69.73% /62.32/ 58.2</li> <li>- VAS non-eligible HHs n=2209, 65.31%/ 66.71/ 62.16</li> <li>- Difference: 4.42 (0.7 to 8.2), P &lt; 0.01/ 4.37** (0.1 to 8.7) / 3.92* (-0.6 to 8.4)</li> <li>- Adjusted difference: 4.96 (1.0 to 8.9), P &lt; 0.01)/ 5.41** (0.9 to 9.9)/ 3.87* (-0.6 to 8.4)</li> </ul> <p>2) Post operation well-being:</p> <p>Respondents from VAS-eligible villages reported greater improvements in well-being after the hospitalization in all categories which were statistically significant in three of the six categories</p> |
|--|--|--|------------------------------------------------------------------|-------------------------------------------------------------------------------------------------------------------------------------------------------------------------------------------------------------------------------------------------------------------------------------------------------------------------------------------------------------------------------------------------------------------------------------------------------------------------------------------------------------------------------------------------------------------------------------------------------------------------------------------------------------------------------------------------------------------------------------------------------------------------------------------------|

1  
2  
3  
4  
5  
6  
7  
8  
9  
10  
11  
12  
13  
14  
15  
16  
17  
18  
19  
20  
21  
22  
23  
24  
25  
26  
27  
28  
29  
30  
31  
32  
33  
34  
35  
36  
37  
38  
39  
40  
41  
42  
43  
44  
45  
46  
47

|                         |                                                                                     |                                                                                                                                                  |                                                                                                                                                                                                                                      |                                                                                                                                                                                                                                                                                                                                                                                             |
|-------------------------|-------------------------------------------------------------------------------------|--------------------------------------------------------------------------------------------------------------------------------------------------|--------------------------------------------------------------------------------------------------------------------------------------------------------------------------------------------------------------------------------------|---------------------------------------------------------------------------------------------------------------------------------------------------------------------------------------------------------------------------------------------------------------------------------------------------------------------------------------------------------------------------------------------|
|                         |                                                                                     |                                                                                                                                                  |                                                                                                                                                                                                                                      | <p>No controls (N=173)/ Controls for illness composition (N=173)/ Controls for illness composition/ demographic characteristics†(N=173)</p> <ul style="list-style-type: none"> <li>• Walking ability 0.765*** (0.248)0.700*** (0.261)0.605** (0.273)</li> <li>• Pain 0.778*** (0.228)0.660*** (0.244)0.559** (0.246)</li> <li>• Anxiety0.464* (0.242)0.451* (0.261)0.387 (0.272)</li> </ul> |
| <b>Sood et al, 2014</b> | <p>Quasi experimental design</p> <p>Multi variate models were used for analysis</p> | <p>All households in sampled villages of Karnataka were asked to participate in a door-to-door survey, and 81% of them completed the survey.</p> | <p>PFHI covered= VAS 31 476 households (22 796 below poverty line and 8680 above poverty line) in 300 villages where the scheme was implemented and 28 633 households (21 767 below poverty line and 6866 above poverty line) in</p> | <p><b>Utilization of healthcare</b></p> <p><b>1. Households using tertiary care facility for potentially covered conditions</b></p> <p>A) All facilities<br/>Unadjusted= -4.3% (p=0.52)<br/>Adjusted= -5.4% (p=0.64)</p> <p>B) All tertiary care facilities<br/>Unadjusted= 12.3% (p=0.46)<br/>Adjusted= 19.9% (p=0.26)</p>                                                                 |

|                                       |                                                                                                            |                                                   |                                                                                                                                                                                                                                                                     |                                                                                                                                                                                                                                                                                                                                               |
|---------------------------------------|------------------------------------------------------------------------------------------------------------|---------------------------------------------------|---------------------------------------------------------------------------------------------------------------------------------------------------------------------------------------------------------------------------------------------------------------------|-----------------------------------------------------------------------------------------------------------------------------------------------------------------------------------------------------------------------------------------------------------------------------------------------------------------------------------------------|
|                                       |                                                                                                            |                                                   | <p>272 neighboring matched villages ineligible for the scheme.</p> <p>A government insurance program (Vajpayee Arogyashree scheme) that provided free tertiary care to households BPL in about half of villages in Karnataka from February 2010 to August 2012.</p> | <p>C) Excluding emergency department admissions and stays of <math>4 \leq \text{days}</math></p> <p>Unadjusted= 44.2% (p=0.06)</p> <p>Adjusted= 42.7% (p=0.08)</p> <p><b>Households reporting forgone need for care for VAS condition</b></p> <p>Reported forgone need</p> <p>Unadjusted= -35.5% (p=0.07)</p> <p>Adjusted=-33.4% (p=0.09)</p> |
| <p><b>Sriram &amp; Khan, 2020</b></p> | <p>Survey among poor individuals: Propensity score matching, logistic regression and Tobit regression.</p> | <p>NSSO survey 2014. N=64270 poor individuals</p> | <p>PFHI covered: Any PFHI scheme</p> <p>PFHI (n= 5917) were matched with control group (n=5917).</p>                                                                                                                                                                | <p><b>Effect of PFHI on hospitalization (Multivariate analysis):</b></p> <p>People enrolled in PFHI program have 1.23 (1.06-1.44) higher odds of incidence of hospitalization compared to poor people without HI.</p>                                                                                                                         |



1  
2  
3  
4  
5  
6  
7  
8  
9  
10  
11  
12  
13  
14  
15  
16  
17  
18  
19  
20  
21  
22  
23  
24  
25  
26  
27  
28  
29  
30  
31  
32  
33  
34  
35  
36  
37  
38  
39  
40  
41  
42  
43  
44  
45  
46  
47

|  |  |  |                                                                                                                                                                                                                                                                            |                                                                                                                                                                                                                                                                                                                                                                                                                                                                                                                                                                                                                                                                                                                                                                                                                                                                                                                 |
|--|--|--|----------------------------------------------------------------------------------------------------------------------------------------------------------------------------------------------------------------------------------------------------------------------------|-----------------------------------------------------------------------------------------------------------------------------------------------------------------------------------------------------------------------------------------------------------------------------------------------------------------------------------------------------------------------------------------------------------------------------------------------------------------------------------------------------------------------------------------------------------------------------------------------------------------------------------------------------------------------------------------------------------------------------------------------------------------------------------------------------------------------------------------------------------------------------------------------------------------|
|  |  |  | <p>Average Treatment on Treated (ATT)</p> <p>Propensity Score Testing of Two Groups: Treated=0.1407, Control= 0.1191, Difference= 0.0216, T statistic= 2.89, SE: 0.0074.</p> <p>Matched with age, individual consumption expenditure, HH size, location and education.</p> | <p>-Individuals with <b>chronic illnesses</b> have 3.55 (2.87–4.45) higher probability of hospitalization compared to individuals without any chronic conditions.</p> <p>-All the <b>age groups</b> show higher probability of hospitalization compared to the reference age group of less than 18 years. [19-40: 1.06 (0.82–1.36), 41 to 60 years 2.44 (1.89–3.15), 61 to 80 years 2.99 (2.14–4.17), Older than 80 years 4.85 (1.71–13.69)]</p> <p>-Individuals belonging to the medium i.e. 5-8 [0.77 (0.66–0.89)] and large I.e. more than 8 [0.47 (0.39–0.58)] <b>HHs size</b> had lower probability of incidence of hospitalization compared to individuals from small HHs.</p> <p>-Social group, religion, urban/rural location, household type, marital status, education, number of hospital beds in the state were not significant in explaining variability in the incidence of hospitalizations.</p> |
|--|--|--|----------------------------------------------------------------------------------------------------------------------------------------------------------------------------------------------------------------------------------------------------------------------------|-----------------------------------------------------------------------------------------------------------------------------------------------------------------------------------------------------------------------------------------------------------------------------------------------------------------------------------------------------------------------------------------------------------------------------------------------------------------------------------------------------------------------------------------------------------------------------------------------------------------------------------------------------------------------------------------------------------------------------------------------------------------------------------------------------------------------------------------------------------------------------------------------------------------|

1  
2  
3  
4  
5  
6  
7  
8  
9  
10  
11  
12  
13  
14  
15  
16  
17  
18  
19  
20  
21  
22  
23  
24  
25  
26  
27  
28  
29  
30  
31  
32  
33  
34  
35  
36  
37  
38  
39  
40  
41  
42  
43  
44  
45  
46  
47

|  |  |  |  |                                                                                                                                                                                                                                                                                                                                                                                                                                                                                                                                                                                                                                                                                                                                                                                                                                             |
|--|--|--|--|---------------------------------------------------------------------------------------------------------------------------------------------------------------------------------------------------------------------------------------------------------------------------------------------------------------------------------------------------------------------------------------------------------------------------------------------------------------------------------------------------------------------------------------------------------------------------------------------------------------------------------------------------------------------------------------------------------------------------------------------------------------------------------------------------------------------------------------------|
|  |  |  |  | <p>- state of residence of the individual using fixed effects had no significant effects.</p> <p><b>Effect of PFHI on the duration or length of hospitalization (Tobit model):</b></p> <p>Being enrolled in PFHI had no significant effect [0.44 (-0.47 - 1.35)] on the duration of hospitalization.</p> <p>-People who had <b>chronic illnesses</b> [3.15 (1.96–4.33)] had significantly higher duration of hospitalization compared to people with no chronic illnesses.</p> <p>-Other covariates such as HH type, religion, age, urban/rural location, HH size, marital status, education, and number of hospital beds had no significant effect on the duration of hospitalization</p> <p>- Rajasthan, Uttar Pradesh, and Gujarat were the only three state showing significant results in fixed effects for the state of residence</p> |
|--|--|--|--|---------------------------------------------------------------------------------------------------------------------------------------------------------------------------------------------------------------------------------------------------------------------------------------------------------------------------------------------------------------------------------------------------------------------------------------------------------------------------------------------------------------------------------------------------------------------------------------------------------------------------------------------------------------------------------------------------------------------------------------------------------------------------------------------------------------------------------------------|

1  
2  
3  
4  
5  
6  
7  
8  
9  
10  
11  
12  
13  
14  
15  
16  
17  
18  
19  
20  
21  
22  
23  
24  
25  
26  
27  
28  
29  
30  
31  
32  
33  
34  
35  
36  
37  
38  
39  
40  
41  
42  
43  
44  
45  
46  
47

|                                     |                                                      |                                                                                                                                                                                                                                                                                                                                                                                                                                                                     |                                                                                                                                                                                                                                                                                           |                                                                                                                                                                                                                                                                                                                                                                                                                                                                                                                                                                                      |
|-------------------------------------|------------------------------------------------------|---------------------------------------------------------------------------------------------------------------------------------------------------------------------------------------------------------------------------------------------------------------------------------------------------------------------------------------------------------------------------------------------------------------------------------------------------------------------|-------------------------------------------------------------------------------------------------------------------------------------------------------------------------------------------------------------------------------------------------------------------------------------------|--------------------------------------------------------------------------------------------------------------------------------------------------------------------------------------------------------------------------------------------------------------------------------------------------------------------------------------------------------------------------------------------------------------------------------------------------------------------------------------------------------------------------------------------------------------------------------------|
| <p><b>Sabharwal et.al, 2014</b></p> | <p>Quasi experimental mixed methods study design</p> | <p>Two districts were selected for this study: Moradabad district in Uttar Pradesh and Aurangabad district in Maharashtra. At the block level (district sub-division), sites were selected where blocks had proportions of SC and Muslim population equal to the district average, and villages were selected with mixed social group populations. Altogether, the study was conducted in 30 villages (14 villages in Moradabad and 16 villages in Aurangabad).</p> | <p>PFHI covered: RSBY<br/>1.Target group: SC, Muslim and upper caste poor households who are beneficiaries of RSBY (whether they have used the smart card or not)<br/>2.Control group: SC, Muslim and upper caste poor households who are eligible for RSBY but who are not enrolled.</p> | <p><b>Health care utilization:</b><br/>In-patient care: Non-beneficiary: Any member of the household ever hospitalized, 1.65 (n=78), Beneficiary but not used RSBY, 1.85 (n=134) and beneficiary but used RSBY, 1.80(n=203)<br/>Between group F value: 0.60, not significant<br/>Outpatient care: Non-beneficiary: Any member of the household never hospitalized, 2.71(n=361) Any member of the household ever hospitalized, 2.87(n=70), Beneficiary but not used RSBY, 2.67(n=772) and beneficiary but used RSBY, 2.45(n=249)<br/>Between group F value: 1.76, not significant</p> |
|-------------------------------------|------------------------------------------------------|---------------------------------------------------------------------------------------------------------------------------------------------------------------------------------------------------------------------------------------------------------------------------------------------------------------------------------------------------------------------------------------------------------------------------------------------------------------------|-------------------------------------------------------------------------------------------------------------------------------------------------------------------------------------------------------------------------------------------------------------------------------------------|--------------------------------------------------------------------------------------------------------------------------------------------------------------------------------------------------------------------------------------------------------------------------------------------------------------------------------------------------------------------------------------------------------------------------------------------------------------------------------------------------------------------------------------------------------------------------------------|

|                                  |  |                                                                                                                                                                                                                                                                                                                                                                             |  |  |
|----------------------------------|--|-----------------------------------------------------------------------------------------------------------------------------------------------------------------------------------------------------------------------------------------------------------------------------------------------------------------------------------------------------------------------------|--|--|
|                                  |  | <p>The households were randomly selected from each village based on RSBY beneficiary lists and BPL lists. The households in each location were stratified into beneficiary ('treatment') households and non-beneficiary or ('control') households. We included a control group in order to allow measurement of impact, given that this survey does not have a baseline</p> |  |  |
| <b>Financial risk protection</b> |  |                                                                                                                                                                                                                                                                                                                                                                             |  |  |

|                                                                                                                                                                                                                                                                                                                                                             |                                                                                                                    |                                                                                                                                                                                                                                           |                                                                                                                                                                                        |                                                                                                                                                                                                                                                                                                                                                                                                                                                                                                                                                                                                                                                                                                                                                                                                                         |
|-------------------------------------------------------------------------------------------------------------------------------------------------------------------------------------------------------------------------------------------------------------------------------------------------------------------------------------------------------------|--------------------------------------------------------------------------------------------------------------------|-------------------------------------------------------------------------------------------------------------------------------------------------------------------------------------------------------------------------------------------|----------------------------------------------------------------------------------------------------------------------------------------------------------------------------------------|-------------------------------------------------------------------------------------------------------------------------------------------------------------------------------------------------------------------------------------------------------------------------------------------------------------------------------------------------------------------------------------------------------------------------------------------------------------------------------------------------------------------------------------------------------------------------------------------------------------------------------------------------------------------------------------------------------------------------------------------------------------------------------------------------------------------------|
| <p>1<br/>2<br/>3<br/>4<br/>5<br/>6<br/>7<br/>8<br/>9<br/>10<br/>11<br/>12<br/>13<br/>14<br/>15<br/>16<br/>17<br/>18<br/>19<br/>20<br/>21<br/>22<br/>23<br/>24<br/>25<br/>26<br/>27<br/>28<br/>29<br/>30<br/>31<br/>32<br/>33<br/>34<br/>35<br/>36<br/>37<br/>38<br/>39<br/>40<br/>41<br/>42<br/>43<br/>44<br/>45<br/>46<br/>47</p> <p><b>Azam, 2017</b></p> | <p>Three large scaled household surveys Matching difference-in-difference analysis (MDID) of longitudinal data</p> | <p>Two waves of India Human Development Survey (2011-12) and (2004-2005) and Human Development Profile of India (HDPI) collected in 1993-94. Data from three states I.e. Andhra Pradesh, Karnataka and Tamil Nadu was not considered.</p> | <p>PFHI covered: RSBY The households having RSBY cards were considered as treatment groups and household not having RSBY cards were control groups in an RSBY implemented district</p> | <p><b>OOPE</b></p> <p><b>Rural India:</b></p> <p>A) RSBY HHs were 1.1% points (<math>p&gt;0.05</math>; <math>SE=0.013</math>) more likely to report OOPE expenditure. ATT as % change for RSBY HHs was 1.56.</p> <p>B) Per capita in-patient expenditure (in INR) for RSBY HHs was -11.567 (<math>SE=12.897</math>). ATT as % change for RSBY HHs was -19.46.</p> <p>C) Per capita out-patient expenditure (in INR) for RSBY HHs was 11.257 (<math>SE=11.200</math>). ATT as % change for RSBY HHs was -11.89</p> <p>D) Per capita total OOP in INR for RSBY HHs was -22.717 (<math>SE=20.156</math>). ATT as % change for RSBY HHs was -14.76.</p> <p>E) RSBY HHs were -0.5% points (<math>p&gt;0.05</math>; <math>SE=0.014</math>) more likely to incur Catastrophic medical expenditure (10% of consumption exp)</p> |
|-------------------------------------------------------------------------------------------------------------------------------------------------------------------------------------------------------------------------------------------------------------------------------------------------------------------------------------------------------------|--------------------------------------------------------------------------------------------------------------------|-------------------------------------------------------------------------------------------------------------------------------------------------------------------------------------------------------------------------------------------|----------------------------------------------------------------------------------------------------------------------------------------------------------------------------------------|-------------------------------------------------------------------------------------------------------------------------------------------------------------------------------------------------------------------------------------------------------------------------------------------------------------------------------------------------------------------------------------------------------------------------------------------------------------------------------------------------------------------------------------------------------------------------------------------------------------------------------------------------------------------------------------------------------------------------------------------------------------------------------------------------------------------------|

|    |  |  |  |                                                           |
|----|--|--|--|-----------------------------------------------------------|
| 1  |  |  |  |                                                           |
| 2  |  |  |  |                                                           |
| 3  |  |  |  |                                                           |
| 4  |  |  |  | F) RSBY HHS were 1.1% points ( $p>0.05$ ; $SE=0.010$ )    |
| 5  |  |  |  | more likely to incur Catastrophic medical expenditure     |
| 6  |  |  |  | (25% of consumption exp.)                                 |
| 7  |  |  |  |                                                           |
| 8  |  |  |  | G) RSBY HHs were 0.8% points ( $p>0.05$ ; $SE=0.008$ )    |
| 9  |  |  |  | more likely to take loan for meeting medical              |
| 10 |  |  |  | expenses.                                                 |
| 11 |  |  |  |                                                           |
| 12 |  |  |  | H) Per capita expenditure on long-term morbidity, for     |
| 13 |  |  |  | RSBY HHs, was $-13.450$ ( $p>0.05$ ; $SE=12.531$ )        |
| 14 |  |  |  |                                                           |
| 15 |  |  |  | I) Per capita expenditure on medicines, for RSBY          |
| 16 |  |  |  | households was $-21.782$ ( $p<0.05$ ; $SE=9.492$ ) (This  |
| 17 |  |  |  | means reduction by 22 INR)                                |
| 18 |  |  |  |                                                           |
| 19 |  |  |  | <b>Urban India:</b>                                       |
| 20 |  |  |  | A) RSBY HHs were $-3.7\%$ points ( $p<0.1$ ; $SE=0.020$ ) |
| 21 |  |  |  | more likely to incur OOPE. ATT as % change for            |
| 22 |  |  |  | RSBY HHs was $-5.56$ .                                    |
| 23 |  |  |  |                                                           |
| 24 |  |  |  | B) For RSBY HHs, per capita inpatient expenditure in      |
| 25 |  |  |  | INR was $-3.786$ ( $p>0.05$ ; $SE=38.906$ ).              |
| 26 |  |  |  |                                                           |
| 27 |  |  |  |                                                           |
| 28 |  |  |  |                                                           |
| 29 |  |  |  |                                                           |
| 30 |  |  |  |                                                           |
| 31 |  |  |  |                                                           |
| 32 |  |  |  |                                                           |
| 33 |  |  |  |                                                           |
| 34 |  |  |  |                                                           |
| 35 |  |  |  |                                                           |
| 36 |  |  |  |                                                           |
| 37 |  |  |  |                                                           |
| 38 |  |  |  |                                                           |
| 39 |  |  |  |                                                           |
| 40 |  |  |  |                                                           |
| 41 |  |  |  |                                                           |
| 42 |  |  |  |                                                           |
| 43 |  |  |  |                                                           |
| 44 |  |  |  |                                                           |
| 45 |  |  |  |                                                           |
| 46 |  |  |  |                                                           |
| 47 |  |  |  |                                                           |

1  
2  
3  
4  
5  
6  
7  
8  
9  
10  
11  
12  
13  
14  
15  
16  
17  
18  
19  
20  
21  
22  
23  
24  
25  
26  
27  
28  
29  
30  
31  
32  
33  
34  
35  
36  
37  
38  
39  
40  
41  
42  
43  
44  
45  
46  
47

|  |  |  |  |                                                                                                                                                                                                                                                                                                                                                                                                                                                                                                                                                                                                                                                                                                                                                                                                                                                                                              |
|--|--|--|--|----------------------------------------------------------------------------------------------------------------------------------------------------------------------------------------------------------------------------------------------------------------------------------------------------------------------------------------------------------------------------------------------------------------------------------------------------------------------------------------------------------------------------------------------------------------------------------------------------------------------------------------------------------------------------------------------------------------------------------------------------------------------------------------------------------------------------------------------------------------------------------------------|
|  |  |  |  | <p>C) For RSBY HHs, per capita outpatient expenditure in INR was -10.574 (<math>p&gt;0.05</math>; SE=11.390)</p> <p>D) Per capita total OOP in INR was - 14.540 (<math>p&gt;0.05</math>; SE=35.198)</p> <p>E) RSBY HHs were -3.3% points (<math>p&gt;0.05</math>; SE=0.022) more likely to incur catastrophic medical expenditure (10% of consumption exp.)</p> <p>F) RSBY HHs were -2.2% points (<math>p&gt;0.05</math>; SE=0.014) more likely to incur catastrophic medical expenditure (25% of consumption exp.)</p> <p>G) RSBY HHs were 3.0% points (<math>p&lt;0.05</math>; SE=0.013) more likely to take loan for meeting medical expenses</p> <p>H) Per capita expenditure on long-term morbidity, for RSBY HHs, was 40.978 (<math>p&gt;0.05</math>; SE=31.105)</p> <p>I) Per capita expenditure on medicines, for RSBY households was 28.763 (<math>p&gt;0.05</math>; SE=31.492)</p> |
|--|--|--|--|----------------------------------------------------------------------------------------------------------------------------------------------------------------------------------------------------------------------------------------------------------------------------------------------------------------------------------------------------------------------------------------------------------------------------------------------------------------------------------------------------------------------------------------------------------------------------------------------------------------------------------------------------------------------------------------------------------------------------------------------------------------------------------------------------------------------------------------------------------------------------------------------|

For peer review only

|                                   |                                                                                                                                                         |                                                                                                                                                                                                               |                                                                                                                                                                                                                                                   |                                                                                                                                                                                                                                                                                                                                                                                                                                                                                                                                                                                                                                                  |
|-----------------------------------|---------------------------------------------------------------------------------------------------------------------------------------------------------|---------------------------------------------------------------------------------------------------------------------------------------------------------------------------------------------------------------|---------------------------------------------------------------------------------------------------------------------------------------------------------------------------------------------------------------------------------------------------|--------------------------------------------------------------------------------------------------------------------------------------------------------------------------------------------------------------------------------------------------------------------------------------------------------------------------------------------------------------------------------------------------------------------------------------------------------------------------------------------------------------------------------------------------------------------------------------------------------------------------------------------------|
| <p><b>Barnes et al., 2017</b></p> | <p>Cross sectional household Survey (nature experiment)<br/><br/>Models used for analysis:<br/><br/>Empirical model<br/><br/>Stylized utility model</p> | <p>Survey was carried out in total of 572 village 272 villages from the northern part of Karnataka and 300 villages from the southern part of Karnataka<br/><br/>Total sample was 6964 HHs with BPL cards</p> | <p>PFHI covered: Vajpayee Arogya Shree Scheme<br/><br/>Intervention group: northern district village that had access to VAS: 272 Villages<br/><br/>Control group: Southern district villages that did not have an access to VAS: 300 Villages</p> | <p><b>1) Money borrowed for health reasons in past one year</b><br/><br/>VAS households= 20.7%<br/><br/>Non-VAS households= 24.2%<br/><br/>Difference= -3.5% (p&lt;0.01)</p> <p><b>2) Catastrophic health care expenditures</b><br/><br/>Percentage of non-food expenditure limit<br/><br/>A) Percentage reaching catastrophic limit:<br/>a. 40% of non- food expenditure limit<br/>VAS= 2.70%<br/>Non-VAS= 3.41 %<br/>Difference= -0.71% (p&lt;0.1)<br/><br/>b. 50% of non- food expenditure limit<br/>VAS= 2.22%<br/>Non-VAS= 2.6 1%<br/>Difference= -0.39% (non-significant)<br/><br/>c.60% of non- food expenditure limit<br/>VAS= 1.68%</p> |
|-----------------------------------|---------------------------------------------------------------------------------------------------------------------------------------------------------|---------------------------------------------------------------------------------------------------------------------------------------------------------------------------------------------------------------|---------------------------------------------------------------------------------------------------------------------------------------------------------------------------------------------------------------------------------------------------|--------------------------------------------------------------------------------------------------------------------------------------------------------------------------------------------------------------------------------------------------------------------------------------------------------------------------------------------------------------------------------------------------------------------------------------------------------------------------------------------------------------------------------------------------------------------------------------------------------------------------------------------------|



1  
2  
3  
4  
5  
6  
7  
8  
9  
10  
11  
12  
13  
14  
15  
16  
17  
18  
19  
20  
21  
22  
23  
24  
25  
26  
27  
28  
29  
30  
31  
32  
33  
34  
35  
36  
37  
38  
39  
40  
41  
42  
43  
44  
45  
46  
47

|  |  |  |  |                                              |
|--|--|--|--|----------------------------------------------|
|  |  |  |  | Non-VAS= 2.08%                               |
|  |  |  |  | Difference= -0.40% (not significant)         |
|  |  |  |  | d. 70% of non- food expenditure limit        |
|  |  |  |  | VAS= 1.34%                                   |
|  |  |  |  | Non-VAS= 1.80%                               |
|  |  |  |  | Difference= -0.46 % (non-significant)        |
|  |  |  |  | e.80% of non- food expenditure limit         |
|  |  |  |  | VAS= 0.91%                                   |
|  |  |  |  | Non-VAS= 1.54%                               |
|  |  |  |  | Difference= -0.6 3% (p<0.05)                 |
|  |  |  |  | B) Mean amount over catastrophic limit (INR) |
|  |  |  |  | a. 40% of non- food expenditure limit        |
|  |  |  |  | VAS= 36 ,822.19                              |
|  |  |  |  | Non-VAS= 56 ,700.92                          |
|  |  |  |  | Difference= -19,878.73 (p<0.05)              |
|  |  |  |  | b. 50% of non- food expenditure limit        |
|  |  |  |  | VAS= 36,862.71                               |
|  |  |  |  | Non-VAS= 66,307.45                           |

For peer review only

|    |  |  |  |                                            |
|----|--|--|--|--------------------------------------------|
| 1  |  |  |  | Difference= -29,444.75 (p<0.05)            |
| 2  |  |  |  |                                            |
| 3  |  |  |  |                                            |
| 4  |  |  |  |                                            |
| 5  |  |  |  | c.60% of non- food expenditure limit       |
| 6  |  |  |  |                                            |
| 7  |  |  |  | VAS= 40,356.36                             |
| 8  |  |  |  |                                            |
| 9  |  |  |  | Non-VAS= 75, 415.93                        |
| 10 |  |  |  |                                            |
| 11 |  |  |  | Difference= -35, 05 9.58 (p<0.05)          |
| 12 |  |  |  |                                            |
| 13 |  |  |  |                                            |
| 14 |  |  |  | d. 70% of non- food expenditure limit      |
| 15 |  |  |  |                                            |
| 16 |  |  |  | VAS= 43,215.88                             |
| 17 |  |  |  |                                            |
| 18 |  |  |  | Non-VAS= 80,362.84                         |
| 19 |  |  |  |                                            |
| 20 |  |  |  | Difference= -37,146.96 (p<0.05)            |
| 21 |  |  |  |                                            |
| 22 |  |  |  | e.80% of non- food expenditure limit       |
| 23 |  |  |  |                                            |
| 24 |  |  |  | VAS= 56,292.79                             |
| 25 |  |  |  |                                            |
| 26 |  |  |  | Non-VAS= 86,913.19                         |
| 27 |  |  |  |                                            |
| 28 |  |  |  | Difference= -30,620.40 (non-significant)   |
| 29 |  |  |  |                                            |
| 30 |  |  |  | Percentage of total expenditure limit      |
| 31 |  |  |  |                                            |
| 32 |  |  |  | A) Percentage reaching catastrophic limit: |
| 33 |  |  |  |                                            |
| 34 |  |  |  | a. 10% of total expenditure limit          |
| 35 |  |  |  |                                            |
| 36 |  |  |  | VAS= 10.03%                                |
| 37 |  |  |  |                                            |
| 38 |  |  |  | Non-VAS= 10.09%                            |
| 39 |  |  |  |                                            |
| 40 |  |  |  |                                            |
| 41 |  |  |  |                                            |
| 42 |  |  |  |                                            |
| 43 |  |  |  |                                            |
| 44 |  |  |  |                                            |
| 45 |  |  |  |                                            |
| 46 |  |  |  |                                            |
| 47 |  |  |  |                                            |

1  
2  
3  
4  
5  
6  
7  
8  
9  
10  
11  
12  
13  
14  
15  
16  
17  
18  
19  
20  
21  
22  
23  
24  
25  
26  
27  
28  
29  
30  
31  
32  
33  
34  
35  
36  
37  
38  
39  
40  
41  
42  
43  
44  
45  
46  
47

|  |  |  |  |                                              |
|--|--|--|--|----------------------------------------------|
|  |  |  |  | Difference= -0.05 % (non-significant)        |
|  |  |  |  | b. 20% of total expenditure limit            |
|  |  |  |  | VAS= 5.92%                                   |
|  |  |  |  | Non-VAS= 6.38%                               |
|  |  |  |  | Difference= -0.46 % (non-significant)        |
|  |  |  |  | c. 30% of total expenditure limit            |
|  |  |  |  | VAS= 3.89%                                   |
|  |  |  |  | Non-VAS= 4.49%                               |
|  |  |  |  | Difference= -0.60% (non-significant)         |
|  |  |  |  | d. 40% of total expenditure limit            |
|  |  |  |  | VAS= 2.58%                                   |
|  |  |  |  | Non-VAS= 3.34%                               |
|  |  |  |  | Difference= -0.76 % (p<0.1)                  |
|  |  |  |  | e. 50% of total expenditure limit            |
|  |  |  |  | VAS= 2.09%                                   |
|  |  |  |  | Non-VAS= 2.55 %                              |
|  |  |  |  | Difference= -0.45 % (non-significant)        |
|  |  |  |  | B) Mean amount over catastrophic limit (INR) |

For peer review only

|    |  |  |  |                                   |
|----|--|--|--|-----------------------------------|
| 1  |  |  |  |                                   |
| 2  |  |  |  |                                   |
| 3  |  |  |  | a. 10% of total expenditure limit |
| 4  |  |  |  | VAS= 21,313.18                    |
| 5  |  |  |  | Non-VAS= 31,983.49                |
| 6  |  |  |  | Difference= -10,670.31 (p<0.01)   |
| 7  |  |  |  |                                   |
| 8  |  |  |  | b. 20% of total expenditure limit |
| 9  |  |  |  | VAS= 26,232.83                    |
| 10 |  |  |  | Non-VAS= 40,554.01                |
| 11 |  |  |  | Difference= -14,321.17 (p<0.05)   |
| 12 |  |  |  |                                   |
| 13 |  |  |  | c. 30% of total expenditure limit |
| 14 |  |  |  | VAS= 30,760.43                    |
| 15 |  |  |  | Non-VAS= 48,536.53                |
| 16 |  |  |  | Difference= -17,776.10 (p<0.05)   |
| 17 |  |  |  |                                   |
| 18 |  |  |  | d. 40% of total expenditure limit |
| 19 |  |  |  | VAS= 37,489.47                    |
| 20 |  |  |  | Non-VAS= 56,974.87                |
| 21 |  |  |  | Difference= -19,485.41 (p<0.05)   |
| 22 |  |  |  |                                   |
| 23 |  |  |  | e. 50% of total expenditure limit |
| 24 |  |  |  | VAS= 37,690.21                    |
| 25 |  |  |  |                                   |
| 26 |  |  |  |                                   |
| 27 |  |  |  |                                   |
| 28 |  |  |  |                                   |
| 29 |  |  |  |                                   |
| 30 |  |  |  |                                   |
| 31 |  |  |  |                                   |
| 32 |  |  |  |                                   |
| 33 |  |  |  |                                   |
| 34 |  |  |  |                                   |
| 35 |  |  |  |                                   |
| 36 |  |  |  |                                   |
| 37 |  |  |  |                                   |
| 38 |  |  |  |                                   |
| 39 |  |  |  |                                   |
| 40 |  |  |  |                                   |
| 41 |  |  |  |                                   |
| 42 |  |  |  |                                   |
| 43 |  |  |  |                                   |
| 44 |  |  |  |                                   |
| 45 |  |  |  |                                   |
| 46 |  |  |  |                                   |
| 47 |  |  |  |                                   |

1  
2  
3  
4  
5  
6  
7  
8  
9  
10  
11  
12  
13  
14  
15  
16  
17  
18  
19  
20  
21  
22  
23  
24  
25  
26  
27  
28  
29  
30  
31  
32  
33  
34  
35  
36  
37  
38  
39  
40  
41  
42  
43  
44  
45  
46  
47

|  |  |  |  |                                                                                                                                                                                                                                                                                                                                                                                                                                                                                                                                                                                                                                                                                                                                  |
|--|--|--|--|----------------------------------------------------------------------------------------------------------------------------------------------------------------------------------------------------------------------------------------------------------------------------------------------------------------------------------------------------------------------------------------------------------------------------------------------------------------------------------------------------------------------------------------------------------------------------------------------------------------------------------------------------------------------------------------------------------------------------------|
|  |  |  |  | <p>Non-VAS= 66,712.53</p> <p>Difference= -29,022.32 (p&lt;0.05)</p> <p><b>3) Distributional effects of access to insurance on out-of-pocket spending</b></p> <p><b>Using conditional quantile regression and censored quantile regression</b></p> <p>Conditional VAS Estimates Using Koenker &amp; Basset Estimator</p> <p>5<sup>th</sup> Quantile: VAS estimate= -529.99 (SE=215.56, p&lt;0.05)</p> <p>10<sup>th</sup> Quantile: VAS estimate= -711.76 (SE=243.99, p&lt;0.01)</p> <p>15<sup>th</sup> Quantile: VAS estimate= -876.62 (SE=343.74, p&lt;0.05)</p> <p>25<sup>th</sup> Quantile: VAS estimate= -1,485.29 (SE=459.92, p&lt;0.01)</p> <p>40<sup>th</sup> Quantile: VAS estimate= -2,197.19 (SE=495.55, p&lt;0.01)</p> |
|--|--|--|--|----------------------------------------------------------------------------------------------------------------------------------------------------------------------------------------------------------------------------------------------------------------------------------------------------------------------------------------------------------------------------------------------------------------------------------------------------------------------------------------------------------------------------------------------------------------------------------------------------------------------------------------------------------------------------------------------------------------------------------|

For peer review only

|    |  |  |  |                                                                |
|----|--|--|--|----------------------------------------------------------------|
| 1  |  |  |  | 50 <sup>th</sup> Quantile: VAS estimate= -2,878.92 (SE=706.33, |
| 2  |  |  |  | p<0.01)                                                        |
| 3  |  |  |  | 60 <sup>th</sup> Quantile: VAS estimate= -2,589.79             |
| 4  |  |  |  | (SE=1,242.94, p<0.05)                                          |
| 5  |  |  |  | 75 <sup>th</sup> Quantile: VAS estimate= -4,484.71             |
| 6  |  |  |  | (SE=1,340.32, p<0.01)                                          |
| 7  |  |  |  | 85 <sup>th</sup> Quantile: VAS estimate= -6,408.61 (SE=3,600.6 |
| 8  |  |  |  | 8, p<0.1)                                                      |
| 9  |  |  |  | 90 <sup>th</sup> Quantile: VAS estimate= -4,941.37             |
| 10 |  |  |  | (SE=5,196.11, p>0.1)                                           |
| 11 |  |  |  | 95 <sup>th</sup> Quantile: VAS                                 |
| 12 |  |  |  | estimate= -23,548.1 (SE=8,199.09, p<0.01)                      |
| 13 |  |  |  | Unconditional VAS Estimates Using Chernozhukov &               |
| 14 |  |  |  | Hong Estimator                                                 |
| 15 |  |  |  | For unconditional distribution effect on OOPE was not          |
| 16 |  |  |  | seen for initial lower quantiles                               |
| 17 |  |  |  | 85 <sup>th</sup> Quantile: VAS estimate= 802.20 (SE=365.61,    |
| 18 |  |  |  | p<0.05)                                                        |

|                                   |                                                                                  |                                                                                                                                                                         |                                                                                                                                                                                                                                                               |                                                                                                                                                                                                                                                                                                                                                                                                                                                                                                                                          |
|-----------------------------------|----------------------------------------------------------------------------------|-------------------------------------------------------------------------------------------------------------------------------------------------------------------------|---------------------------------------------------------------------------------------------------------------------------------------------------------------------------------------------------------------------------------------------------------------|------------------------------------------------------------------------------------------------------------------------------------------------------------------------------------------------------------------------------------------------------------------------------------------------------------------------------------------------------------------------------------------------------------------------------------------------------------------------------------------------------------------------------------------|
|                                   |                                                                                  |                                                                                                                                                                         |                                                                                                                                                                                                                                                               | 90 <sup>th</sup> Quantile: VAS estimate= -1,026.96 (SE=705.06, p>0.1)<br>95 <sup>th</sup> Quantile: VAS estimate= -3,906.08 (SE=1,748.25, p<0.05)                                                                                                                                                                                                                                                                                                                                                                                        |
| <b>Fan, Karan and Mahal, 2012</b> | Secondary data analysis<br><br>Difference in difference (DID) method; regression | Data from Consumer Expenditure Surveys for 1999-2000, 2004-2005, 2007-2008 i.e., The 55 <sup>th</sup> , 61 <sup>st</sup> and 64 <sup>th</sup> round of the NSSO surveys | PFHI covered: Arogyashree in AP<br><br><b>Treatment groups (Andhra Pradesh)</b><br><br>Phase 1: Activities started in April 2007 and renewal in April 2008. Phase I districts were Ananthapur, Mahabubnagar, and Srikakulam. n: 2004-05=1702 and 2007-08 =448 | <b>The impact of Aarogyasri on per capita monthly OOP spending:</b><br><br>(Only statistically significant DID results are extracted here, **p<0.01, *p<0.05)<br><br><b>A. Andhra Pradesh sample</b><br><br><i>1. Inpatient expenditure:</i><br>a. Region and state fixed effects: Phase 1: -12.177 (SE: 0.352)**, Phase 2: Not significant result<br>b. With HH covariates in addition to region and state fixed effects<br>Phase 1: -11.822 (SE: 0.425)**, Phase 2: Not significant result<br><br><i>2. Inpatient drug expenditure</i> |

|  |  |  |                                                                                                                                                                                                                                                                                                                                                                  |                                                                                                                                                                                                                                                                                                                                                                                                                                                                                                                                                                                                                                                       |
|--|--|--|------------------------------------------------------------------------------------------------------------------------------------------------------------------------------------------------------------------------------------------------------------------------------------------------------------------------------------------------------------------|-------------------------------------------------------------------------------------------------------------------------------------------------------------------------------------------------------------------------------------------------------------------------------------------------------------------------------------------------------------------------------------------------------------------------------------------------------------------------------------------------------------------------------------------------------------------------------------------------------------------------------------------------------|
|  |  |  | <p>Phase 2: Activities started in December 2007 and renewed in December 2008. Phase II districts were East Godavari, West Godavari, Nalgonda, Rangareddy, and Chittoor</p> <p>n: 2004-05 = 2057 and 2007-08= 863</p> <p><b>Control Group (Andhra Pradesh)</b> that were not covered by Phases 1 and 2.</p> <p>2004-2005 (n)= 5269</p> <p>2007-2008 (n)= 2172</p> | <p>a. Region and state fixed effects:<br/>Phase 1: -5.325 (SE: 1.017)**, Phase 2: Not significant result</p> <p>b. With HH covariates in addition to region and state fixed effect:<br/>Phase 1: -5.111 (SE: 0.926)**, Phase 2: Not significant result</p> <p><i>1. Outpatient, outpatient drug and total expenditure</i> result was not significant for both, Phase 1 and 2</p> <p><b>B) South India sample</b></p> <p><i>1. Inpatient expenditure:</i></p> <p>a. Region and state fixed effects:<br/>Phase 1: -14.350 (SE: 4.005)**, Phase 2: Not significant result</p> <p>b. With HH covariates in addition to region and state fixed effect:</p> |
|--|--|--|------------------------------------------------------------------------------------------------------------------------------------------------------------------------------------------------------------------------------------------------------------------------------------------------------------------------------------------------------------------|-------------------------------------------------------------------------------------------------------------------------------------------------------------------------------------------------------------------------------------------------------------------------------------------------------------------------------------------------------------------------------------------------------------------------------------------------------------------------------------------------------------------------------------------------------------------------------------------------------------------------------------------------------|



1  
2  
3  
4  
5  
6  
7  
8  
9  
10  
11  
12  
13  
14  
15  
16  
17  
18  
19  
20  
21  
22  
23  
24  
25  
26  
27  
28  
29  
30  
31  
32  
33  
34  
35  
36  
37  
38  
39  
40  
41  
42  
43  
44  
45  
46  
47

|  |  |  |                                                                                         |                                                                                                                                                                                                                                                                                                                                                                                                                                                                                                                                                                                                                                                                                               |
|--|--|--|-----------------------------------------------------------------------------------------|-----------------------------------------------------------------------------------------------------------------------------------------------------------------------------------------------------------------------------------------------------------------------------------------------------------------------------------------------------------------------------------------------------------------------------------------------------------------------------------------------------------------------------------------------------------------------------------------------------------------------------------------------------------------------------------------------|
|  |  |  | <p><b>Control Groups (All India)</b></p> <p>n= 2004-05: 116,136 and 2007-08: 46,814</p> | <p>Phase 1: -13.430 (SE: 3.791)**, Phase 2: Not significant result</p> <p><i>1. Inpatient drug expenditure</i></p> <p>a. Region and state fixed effects::</p> <p>Phase 1: -4.617 (SE: 1.143)**, Phase 2: Not significant result</p> <p>b. With HH covariates in addition to region and state fixed effect</p> <p>Phase 1: -4.310 (SE: 1.067)**, Phase 2: Not significant result</p> <p><i>1. Outpatient drug expenditure</i></p> <p>a. Region and state fixed effect:</p> <p>Phase 2: -7.120 (SE: 3.055)*, Phase 1: Not significant result</p> <p>b. With HH covariates in addition to region and state fixed effect:</p> <p>Phase 2: -7.211(SE: 3.201)*, Phase 1: Not significant result</p> |
|--|--|--|-----------------------------------------------------------------------------------------|-----------------------------------------------------------------------------------------------------------------------------------------------------------------------------------------------------------------------------------------------------------------------------------------------------------------------------------------------------------------------------------------------------------------------------------------------------------------------------------------------------------------------------------------------------------------------------------------------------------------------------------------------------------------------------------------------|

For peer review only

|    |  |  |  |                                                            |
|----|--|--|--|------------------------------------------------------------|
| 1  |  |  |  |                                                            |
| 2  |  |  |  |                                                            |
| 3  |  |  |  |                                                            |
| 4  |  |  |  |                                                            |
| 5  |  |  |  | <i>1. Outpatient and total expenditure:</i> Result was not |
| 6  |  |  |  | significant for both phases                                |
| 7  |  |  |  |                                                            |
| 8  |  |  |  | <b>C) All India sample</b>                                 |
| 9  |  |  |  |                                                            |
| 10 |  |  |  | <i>1. Inpatient expenditure:</i>                           |
| 11 |  |  |  |                                                            |
| 12 |  |  |  | a. Region and state fixed effects:                         |
| 13 |  |  |  |                                                            |
| 14 |  |  |  | Phase 1: -11.304 (SE: 1.717)**, Phase 2: Not               |
| 15 |  |  |  | significant result                                         |
| 16 |  |  |  |                                                            |
| 17 |  |  |  | b. With HH covariates in addition to region and state      |
| 18 |  |  |  | fixed effects                                              |
| 19 |  |  |  |                                                            |
| 20 |  |  |  | Phase 1: -10.606 (SE: 1.787)**, Phase 2: Not               |
| 21 |  |  |  | significant result                                         |
| 22 |  |  |  |                                                            |
| 23 |  |  |  | <i>1. Inpatient drug expenditure</i>                       |
| 24 |  |  |  |                                                            |
| 25 |  |  |  | a. Region and state fixed effects:                         |
| 26 |  |  |  |                                                            |
| 27 |  |  |  | Phase 1: -3.669 (SE: 0.664)**, Phase 2: Not                |
| 28 |  |  |  | significant result                                         |
| 29 |  |  |  |                                                            |
| 30 |  |  |  | b. With HH covariates in addition to region and state      |
| 31 |  |  |  | fixed effects                                              |
| 32 |  |  |  |                                                            |
| 33 |  |  |  |                                                            |
| 34 |  |  |  |                                                            |
| 35 |  |  |  |                                                            |
| 36 |  |  |  |                                                            |
| 37 |  |  |  |                                                            |
| 38 |  |  |  |                                                            |
| 39 |  |  |  |                                                            |
| 40 |  |  |  |                                                            |
| 41 |  |  |  |                                                            |
| 42 |  |  |  |                                                            |
| 43 |  |  |  |                                                            |
| 44 |  |  |  |                                                            |
| 45 |  |  |  |                                                            |
| 46 |  |  |  |                                                            |
| 47 |  |  |  |                                                            |

1  
2  
3  
4  
5  
6  
7  
8  
9  
10  
11  
12  
13  
14  
15  
16  
17  
18  
19  
20  
21  
22  
23  
24  
25  
26  
27  
28  
29  
30  
31  
32  
33  
34  
35  
36  
37  
38  
39  
40  
41  
42  
43  
44  
45  
46  
47

|  |  |  |  |                                                                                                                                                                                                                                                                                                                                                                                                                                                                                                                                                                                                                                                                                                                                                                                                                                                            |
|--|--|--|--|------------------------------------------------------------------------------------------------------------------------------------------------------------------------------------------------------------------------------------------------------------------------------------------------------------------------------------------------------------------------------------------------------------------------------------------------------------------------------------------------------------------------------------------------------------------------------------------------------------------------------------------------------------------------------------------------------------------------------------------------------------------------------------------------------------------------------------------------------------|
|  |  |  |  | <p>Phase 1: <math>-3.517</math> (SE: <math>0.606</math>)**, Phase 2: Not significant result</p> <p><i>1. Outpatient drug expenditure</i></p> <p>a. Region and state fixed effects:</p> <p>Phase 2: <math>-6.417</math> (SE: <math>2.747</math>)*, Phase 1: Not significant result</p> <p>b. With HH covariates in addition to region and state fixed effects</p> <p>Phase 2: <math>-6.973</math> (SE: <math>2.837</math>)*, Phase 1: Not significant result</p> <p><i>1. Outpatient and total expenditure:</i> Result was not significant for both phases</p> <p><b>Effect of Aarogyasri on impoverishment and CHE over 2004–2008</b></p> <p><b>A. Impoverishment:</b></p> <p>Results of intervention, South India and All India locations for both Phases (1 &amp;2) were statistically not significant, irrespective of using region and state fixed</p> |
|--|--|--|--|------------------------------------------------------------------------------------------------------------------------------------------------------------------------------------------------------------------------------------------------------------------------------------------------------------------------------------------------------------------------------------------------------------------------------------------------------------------------------------------------------------------------------------------------------------------------------------------------------------------------------------------------------------------------------------------------------------------------------------------------------------------------------------------------------------------------------------------------------------|

For peer review only

|    |  |  |  |  |                                                                   |
|----|--|--|--|--|-------------------------------------------------------------------|
| 1  |  |  |  |  |                                                                   |
| 2  |  |  |  |  |                                                                   |
| 3  |  |  |  |  |                                                                   |
| 4  |  |  |  |  | effects or using HH covariates in addition to region              |
| 5  |  |  |  |  | and state fixed effect models.                                    |
| 6  |  |  |  |  |                                                                   |
| 7  |  |  |  |  | <b>B. Impoverishment from OOPE:</b>                               |
| 8  |  |  |  |  |                                                                   |
| 9  |  |  |  |  | Results of intervention, South India and All India                |
| 10 |  |  |  |  | locations for both Phases (1 &2) were statistically not           |
| 11 |  |  |  |  | significant, irrespective of using region and state               |
| 12 |  |  |  |  | fixed effects or using HH covariates in addition to               |
| 13 |  |  |  |  | region and state fixed effect models.                             |
| 14 |  |  |  |  |                                                                   |
| 15 |  |  |  |  | <b>A. Total health expenditure <math>\geq</math> 15% of total</b> |
| 16 |  |  |  |  | <b>household expenditure:</b>                                     |
| 17 |  |  |  |  |                                                                   |
| 18 |  |  |  |  | Phase 2 using region and state fixed effect model,                |
| 19 |  |  |  |  | DID for all India sample was: $-0.041$ (SE: $0.020$ )*.           |
| 20 |  |  |  |  |                                                                   |
| 21 |  |  |  |  | Results of intervention and South India for both                  |
| 22 |  |  |  |  | Phases (1 &2) were statistically not significant,                 |
| 23 |  |  |  |  | irrespective of using region and state fixed effects or           |
| 24 |  |  |  |  | using HH covariates in addition to region and state               |
| 25 |  |  |  |  | fixed effect models. Result was not significant for               |
| 26 |  |  |  |  | phase 1 of All India locations using both models and              |
| 27 |  |  |  |  |                                                                   |
| 28 |  |  |  |  |                                                                   |
| 29 |  |  |  |  |                                                                   |
| 30 |  |  |  |  |                                                                   |
| 31 |  |  |  |  |                                                                   |
| 32 |  |  |  |  |                                                                   |
| 33 |  |  |  |  |                                                                   |
| 34 |  |  |  |  |                                                                   |
| 35 |  |  |  |  |                                                                   |
| 36 |  |  |  |  |                                                                   |
| 37 |  |  |  |  |                                                                   |
| 38 |  |  |  |  |                                                                   |
| 39 |  |  |  |  |                                                                   |
| 40 |  |  |  |  |                                                                   |
| 41 |  |  |  |  |                                                                   |
| 42 |  |  |  |  |                                                                   |
| 43 |  |  |  |  |                                                                   |
| 44 |  |  |  |  |                                                                   |
| 45 |  |  |  |  |                                                                   |
| 46 |  |  |  |  |                                                                   |
| 47 |  |  |  |  |                                                                   |

1  
2  
3  
4  
5  
6  
7  
8  
9  
10  
11  
12  
13  
14  
15  
16  
17  
18  
19  
20  
21  
22  
23  
24  
25  
26  
27  
28  
29  
30  
31  
32  
33  
34  
35  
36  
37  
38  
39  
40  
41  
42  
43  
44  
45  
46  
47

|  |  |  |  |                                                                                                                                                                                                                                                                                                                                                                                                                                                                                                                                                                                                                                                                                                                                                                                                                                                                                                                                                                                                                          |
|--|--|--|--|--------------------------------------------------------------------------------------------------------------------------------------------------------------------------------------------------------------------------------------------------------------------------------------------------------------------------------------------------------------------------------------------------------------------------------------------------------------------------------------------------------------------------------------------------------------------------------------------------------------------------------------------------------------------------------------------------------------------------------------------------------------------------------------------------------------------------------------------------------------------------------------------------------------------------------------------------------------------------------------------------------------------------|
|  |  |  |  | <p>for phase 2 using HH covariates in addition to region and state fixed effect model.</p> <p><b>B. Total health expend. <math>\geq 25\%</math> of non-food household expenditure</b></p> <p>Phase 2 using region and state fixed effect model, DID for all India sample was: <math>-0.043</math> (SE: <math>0.020</math>)*and using HH covariates in addition to region and state fixed effect model was <math>-0.042</math> (SE: <math>0.020</math>)*.</p> <p>Results of intervention and South India for both Phases (1 &amp;2) were statistically not significant, irrespective of using region and state fixed effects or using HH covariates in addition to region and state fixed effect models.</p> <p><b>C. Total health expend. <math>\geq 15\%</math> of total expend. and inpatient expend. <math>\geq 7.5\%</math></b></p> <p><b>a. Andhra Pradesh sample</b></p> <p>Phase 1: region and state fixed effect model: <math>-0.025</math> (SE: <math>0.010</math>)* and using HH covariates in addition to</p> |
|--|--|--|--|--------------------------------------------------------------------------------------------------------------------------------------------------------------------------------------------------------------------------------------------------------------------------------------------------------------------------------------------------------------------------------------------------------------------------------------------------------------------------------------------------------------------------------------------------------------------------------------------------------------------------------------------------------------------------------------------------------------------------------------------------------------------------------------------------------------------------------------------------------------------------------------------------------------------------------------------------------------------------------------------------------------------------|

For peer review only

|  |  |  |  |                                                                                                                                                                                                                                                                                                                                                                                                                                                                                                                                                                                                                                                                                                                                                                                                                                                                                                                                                                                            |
|--|--|--|--|--------------------------------------------------------------------------------------------------------------------------------------------------------------------------------------------------------------------------------------------------------------------------------------------------------------------------------------------------------------------------------------------------------------------------------------------------------------------------------------------------------------------------------------------------------------------------------------------------------------------------------------------------------------------------------------------------------------------------------------------------------------------------------------------------------------------------------------------------------------------------------------------------------------------------------------------------------------------------------------------|
|  |  |  |  | <p>region and state fixed effect models <math>-0.025</math><br/>(SE: 0.010)*. For Phase 2 it was not significant.</p> <p><b>b. South India sample</b></p> <p>Phase 1: region and state fixed effect model: <math>-0.029</math><br/>(SE: 0.013)* and using HH covariates in addition to<br/>region and state fixed effect models <math>-0.027</math><br/>(SE: 0.018)*. For Phase 2 it was not significant.</p> <p><b>c. All India sample</b></p> <p>Phase 1: region and state fixed effect model: <math>-0.030</math><br/>(SE: 0.012)* and using HH covariates in addition to<br/>region and state fixed effect models <math>-0.029</math><br/>(SE: 0.011)*.</p> <p>Phase 2: region and state fixed effect model: <math>-0.014</math><br/>(SE: 0.005)* and using HH covariates in addition to<br/>region and state fixed effect models <math>-0.014</math><br/>(SE: 0.000)*.</p> <p><b>Effect of Aarogyasri on prevalence of any health<br/>expenditure in household over 2004–2008</b></p> |
|--|--|--|--|--------------------------------------------------------------------------------------------------------------------------------------------------------------------------------------------------------------------------------------------------------------------------------------------------------------------------------------------------------------------------------------------------------------------------------------------------------------------------------------------------------------------------------------------------------------------------------------------------------------------------------------------------------------------------------------------------------------------------------------------------------------------------------------------------------------------------------------------------------------------------------------------------------------------------------------------------------------------------------------------|

1  
2  
3  
4  
5  
6  
7  
8  
9  
10  
11  
12  
13  
14  
15  
16  
17  
18  
19  
20  
21  
22  
23  
24  
25  
26  
27  
28  
29  
30  
31  
32  
33  
34  
35  
36  
37  
38  
39  
40  
41  
42  
43  
44  
45  
46  
47

|  |  |  |  |                                                                                                                                                                                                                                                                                                                                                                                                                                                                                                                                                                                                                                                                                                                                                                                                 |
|--|--|--|--|-------------------------------------------------------------------------------------------------------------------------------------------------------------------------------------------------------------------------------------------------------------------------------------------------------------------------------------------------------------------------------------------------------------------------------------------------------------------------------------------------------------------------------------------------------------------------------------------------------------------------------------------------------------------------------------------------------------------------------------------------------------------------------------------------|
|  |  |  |  | <p><b>A. Any health expenditure</b></p> <p><b>a. Andhra Pradesh sample</b></p> <p>Phase 1: region and state fixed effect model: -0.180 (SE: 0.021)** and using HH covariates in addition to region and state fixed effect models -0.164 (SE: 0.020)*. For Phase 2 it was not significant.</p> <p><b>b. South India sample</b></p> <p>Phase 1: region and state fixed effect model: -0.163 (SE: 0.068)* and using HH covariates in addition to region and state fixed effect models -0.150 (SE: 0.066)*. For Phase 2 it was not significant.</p> <p><b>c. All India sample</b></p> <p>Phase 1: region and state fixed effect model: -0.176 (SE: 0.060)* and using HH covariates in addition to region and state fixed effect models -0.167 (SE: 0.057)*. For Phase 2 it was not significant.</p> |
|--|--|--|--|-------------------------------------------------------------------------------------------------------------------------------------------------------------------------------------------------------------------------------------------------------------------------------------------------------------------------------------------------------------------------------------------------------------------------------------------------------------------------------------------------------------------------------------------------------------------------------------------------------------------------------------------------------------------------------------------------------------------------------------------------------------------------------------------------|

For peer review only

**B. Any inpatient expenditure****a. Andhra Pradesh sample**

For both Phases and using both model the result was not significant.

**b. South India sample**

Phase 1: region and state fixed effect model:  $-0.061$  (SE:  $0.022$ )\* and using HH covariates in addition to region and state fixed effect models  $-0.059$  (SE:  $0.023$ )\*. For Phase 2 it was not significant.

**c. All India sample**

Phase 1: region and state fixed effect model:  $-0.065$  (SE:  $0.020$ )\* and using HH covariates in addition to region and state fixed effect models  $-0.063$  (SE:  $0.020$ )\*. For Phase 2 it was not significant.

**C. Any outpatient expenditure****a. Andhra Pradesh sample**



1  
2  
3  
4  
5  
6  
7  
8  
9  
10  
11  
12  
13  
14  
15  
16  
17  
18  
19  
20  
21  
22  
23  
24  
25  
26  
27  
28  
29  
30  
31  
32  
33  
34  
35  
36  
37  
38  
39  
40  
41  
42  
43  
44  
45  
46  
47

|  |  |  |  |                                                                                                                                                                                                                                                                                                                                                                                                                                                                                                                                                                                                                                                                                                                                                                                                                                                                                                       |
|--|--|--|--|-------------------------------------------------------------------------------------------------------------------------------------------------------------------------------------------------------------------------------------------------------------------------------------------------------------------------------------------------------------------------------------------------------------------------------------------------------------------------------------------------------------------------------------------------------------------------------------------------------------------------------------------------------------------------------------------------------------------------------------------------------------------------------------------------------------------------------------------------------------------------------------------------------|
|  |  |  |  | <p>Phase 1: region and state fixed effect model: <math>-0.132</math> (SE: 0.017)** and using HH covariates in addition to region and state fixed effect models <math>-0.116</math> (SE: 0.013)*. For Phase 2 it was not significant.</p> <p><b>b. South India sample</b></p> <p>Phase 1: region and state fixed effect model: <math>-0.138</math> (SE: 0.063)* and using HH covariates in addition to region and state fixed effect models <math>-0.125</math> (SE: 0.061)*. For Phase 2 it was not significant.</p> <p><b>c. All India sample</b></p> <p>Phase 1: region and state fixed effect model: <math>-0.149</math> (SE: 0.059)* and using HH covariates in addition to region and state fixed effect models <math>-0.140</math> (SE: 0.056)*. For Phase 2 it was not significant.</p> <p><b>D. Any inpatient drug expenditure</b></p> <p><b>a. Andhra Pradesh and South India sample</b></p> |
|--|--|--|--|-------------------------------------------------------------------------------------------------------------------------------------------------------------------------------------------------------------------------------------------------------------------------------------------------------------------------------------------------------------------------------------------------------------------------------------------------------------------------------------------------------------------------------------------------------------------------------------------------------------------------------------------------------------------------------------------------------------------------------------------------------------------------------------------------------------------------------------------------------------------------------------------------------|

|  |  |  |  |                                                                                                                                                                                                                                                                                                                                                                                                                                                                                                                                                                                                                                                                                                                                                                                                                                                |
|--|--|--|--|------------------------------------------------------------------------------------------------------------------------------------------------------------------------------------------------------------------------------------------------------------------------------------------------------------------------------------------------------------------------------------------------------------------------------------------------------------------------------------------------------------------------------------------------------------------------------------------------------------------------------------------------------------------------------------------------------------------------------------------------------------------------------------------------------------------------------------------------|
|  |  |  |  | <p>The result for both phases and using both models, was not statistically significant</p> <p><b>b. All India sample</b></p> <p>Phase 1: region and state fixed effect model: <math>-0.048</math> (SE: 0.021)* and using HH covariates in addition to region and state fixed effect models <math>-0.046</math> (SE: 0.021)*. For Phase 2 it was not significant.</p> <p><b>E. Any outpatient drug expenditure</b></p> <p><b>a. Andhra Pradesh sample</b></p> <p>Phase 1: region and state fixed effect model: <math>-0.100</math> (SE: 0.029)** and using HH covariates in addition to region and state fixed effect models <math>-0.084</math> (SE: 0.026)*. For Phase 2 it was not significant.</p> <p><b>b. South India sample</b></p> <p>Result for both phases and both models was not significant.</p> <p><b>c. All India sample</b></p> |
|--|--|--|--|------------------------------------------------------------------------------------------------------------------------------------------------------------------------------------------------------------------------------------------------------------------------------------------------------------------------------------------------------------------------------------------------------------------------------------------------------------------------------------------------------------------------------------------------------------------------------------------------------------------------------------------------------------------------------------------------------------------------------------------------------------------------------------------------------------------------------------------------|

|                                       |                                                                                     |                                                                                                                                                                                                                                                                      |                                                                                                                                     |                                                                                                                                                                                                                                                                                                                                                                                                                                                                                                                                                                                                                 |
|---------------------------------------|-------------------------------------------------------------------------------------|----------------------------------------------------------------------------------------------------------------------------------------------------------------------------------------------------------------------------------------------------------------------|-------------------------------------------------------------------------------------------------------------------------------------|-----------------------------------------------------------------------------------------------------------------------------------------------------------------------------------------------------------------------------------------------------------------------------------------------------------------------------------------------------------------------------------------------------------------------------------------------------------------------------------------------------------------------------------------------------------------------------------------------------------------|
|                                       |                                                                                     |                                                                                                                                                                                                                                                                      |                                                                                                                                     | <p>Phase 1: region and state fixed effect model:<br/>       -0.125 (SE: 0.056)* and using HH covariates in addition to region and state fixed effect models -0.116 (SE: 0.053)*. For Phase 2 it was not significant.</p>                                                                                                                                                                                                                                                                                                                                                                                        |
| <p><b>Ghosh &amp; Gupta, 2017</b></p> | <p>Impact evaluation: Coarsened exact matching and, linear and logit regression</p> | <p>National Sample Survey data: 18 states, which do not have additional state funded insurance (round not reported). States having specific PFHIs, union territories not exposed to RSBY and states not having functional RSBY in the year 2014-15 were excluded</p> | <p>PFHI covered: RSBY<br/> <b>Treated group:</b> Household having at least one person enrolled in RSBY. <b>Control:</b> no RSBY</p> | <p><b>1) OOPs on all OP visits:</b> no statistically significant difference between RSBY insured &amp; uninsured households in terms of OOP expenditure on OP visits i.e. SATT=-1014.12 (p=0.097)<br/> <b>2) Incidence of catastrophic expenditure for OP care:</b> OR= 0.64 (p=0.23)<br/> <b>3) OOPs on all IP visits:</b> no statistically significant difference between RSBY insured &amp; uninsured households in terms of OOP expenditure on inpatient visits I.e. SATT=-6122.37 (p=0.063)<br/> <b>4) the probability of incurring zero OOP expenditure on IP care</b> is not statistically different</p> |

1  
2  
3  
4  
5  
6  
7  
8  
9  
10  
11  
12  
13  
14  
15  
16  
17  
18  
19  
20  
21  
22  
23  
24  
25  
26  
27  
28  
29  
30  
31  
32  
33  
34  
35  
36  
37  
38  
39  
40  
41  
42  
43  
44  
45  
46  
47

|                          |                                                                                                                                                                                      |                                                                                                                                                  |                                                                                                                                                                 |                                                                                                                                                                                                                                                                                                                                                                                                                                         |
|--------------------------|--------------------------------------------------------------------------------------------------------------------------------------------------------------------------------------|--------------------------------------------------------------------------------------------------------------------------------------------------|-----------------------------------------------------------------------------------------------------------------------------------------------------------------|-----------------------------------------------------------------------------------------------------------------------------------------------------------------------------------------------------------------------------------------------------------------------------------------------------------------------------------------------------------------------------------------------------------------------------------------|
|                          |                                                                                                                                                                                      |                                                                                                                                                  |                                                                                                                                                                 | <p>between the RSBY-insured and uninsured families i.e. OR= 1.75 (p=0.127)</p> <p>5) Incidence of <b>catastrophic expenditure for IP care</b>: OR= 0.86 (p=0.5).</p> <p>6) <b>Impoverishment due to OOP on IP care</b>: SATT= 0.83 (p=0.663)</p> <p>7) <b>Total OOP spending</b>: SATT= -550.47 (p=0.067)</p> <p>8) Incidence of catastrophic expenditure: OR= 0.76 (p=0.130)</p> <p>9) <b>Impoverishment</b>: SATT= 0.96 (p=0.896)</p> |
| <p><b>Garg, 2020</b></p> | <p>Impact evaluation using NSS survey 2004 when there was no PFHI, and 2014 data (for older PFHI scheme) and primary household survey in 2019 (for data related to the effect of</p> | <p>NSS survey data</p> <p>Multivariate analysis to see the effect of PMJAY on CHE and OOPE</p> <p>OLS model for continuous outcome available</p> | <p>PFHI covered: PMJAY scheme introduced in the year 2018.</p> <p>The study also mentions other PFHI schemes like MSBY and RSBY operational in Chhattisgarh</p> | <p><b>1) OOPE and financial protection</b></p> <p>A) Mean OOPE for Hospitalization Episodes (in INR)</p> <p>Public= 3078 (95% CI1928–4228)</p> <p>Private= 19,375 (95% CI11305–27,447)</p> <p>B) Median OOPE for Hospitalization Episodes (in INR)</p> <p>Public= 530 (95% CI 379–758)</p> <p>Private= 7299 (95% CI 3788–9032)</p>                                                                                                      |

1  
2  
3  
4  
5  
6  
7  
8  
9  
10  
11  
12  
13  
14  
15  
16  
17  
18  
19  
20  
21  
22  
23  
24  
25  
26  
27  
28  
29  
30  
31  
32  
33  
34  
35  
36  
37  
38  
39  
40  
41  
42  
43  
44  
45  
46  
47

|  |                                                                                          |                                                                                                                                                                                                                                                                                                                                   |  |                                                                                                                                                                                                                                                                                                                                                                                                                                                                                                                                                                                                                                                                                                                                                                                   |
|--|------------------------------------------------------------------------------------------|-----------------------------------------------------------------------------------------------------------------------------------------------------------------------------------------------------------------------------------------------------------------------------------------------------------------------------------|--|-----------------------------------------------------------------------------------------------------------------------------------------------------------------------------------------------------------------------------------------------------------------------------------------------------------------------------------------------------------------------------------------------------------------------------------------------------------------------------------------------------------------------------------------------------------------------------------------------------------------------------------------------------------------------------------------------------------------------------------------------------------------------------------|
|  | <p>first year<br/>of implementing<br/>PMJAY) in the state of<br/>Chhattisgarh, India</p> | <p>and Probit model for binary<br/>outcome variable.<br/><br/>Compared with ATT under<br/>Propensity Score Matching<br/>or PSM<br/><br/>Multivariate analysis was<br/>repeated for OOPE and<br/>CHE using IV approach.<br/><br/>For OOPE 2sls was<br/>applied as IV model, and<br/>for CHE two step<br/>IV Probit was applied</p> |  | <p>C) Proportion of incurred CHE25<br/>for Hospitalization Episode (%)<br/>Public= 7.6 (95% CI 4.5–11.0)<br/>Private= 43.6 (95% CI 36.3–51.4)</p> <p><b>2) Effect of enrolment in PMJAY and other PFHI<br/>on OOPE and CHE</b></p> <p>A) OLS model (for continuous outcome variable)<br/>OOPE (PMJAY)= coeff – 4287 (p=0.09)<br/>OOPE (PFHI)= coeff. –87 (p=0.97)<br/>Log of OOPE (PMJAY)= coeff. –0.45 (p&lt; 0.01)<br/>Log of OOPE (PFHI)= coeff. –0.34 (p &lt; 0.01)</p> <p>B) Probit Model (for binary outcome variable)<br/>CHE 10 (PMJAY)= coeff. 0.08 (p=0.35)<br/>CHE10 (PFHI)= coeff. –0.07 (p=0.29)<br/>CHE25 (PMJAY) =coeff. 0.22 (p= 0.01)<br/>CHE25 (PFHI)= coeff. 0.04 (p= 0.56)<br/>CHE40 (PMJAY)= coeff. 0.26 (p=0.01)<br/>CHE40 (PFHI)= coeff. 0.05 (p=0.55)</p> |
|--|------------------------------------------------------------------------------------------|-----------------------------------------------------------------------------------------------------------------------------------------------------------------------------------------------------------------------------------------------------------------------------------------------------------------------------------|--|-----------------------------------------------------------------------------------------------------------------------------------------------------------------------------------------------------------------------------------------------------------------------------------------------------------------------------------------------------------------------------------------------------------------------------------------------------------------------------------------------------------------------------------------------------------------------------------------------------------------------------------------------------------------------------------------------------------------------------------------------------------------------------------|

|    |  |  |  |                                             |
|----|--|--|--|---------------------------------------------|
| 1  |  |  |  | C) PSM model (ATT)                          |
| 2  |  |  |  |                                             |
| 3  |  |  |  |                                             |
| 4  |  |  |  |                                             |
| 5  |  |  |  | OOPE (PMJAY)= coeff. - 4614 (p=0.20)        |
| 6  |  |  |  |                                             |
| 7  |  |  |  | OOPE (PFHI)= coeff. - 1066 (p=0.73)         |
| 8  |  |  |  |                                             |
| 9  |  |  |  | Log of OOPE (PMJAY)= coeff. -0.37 (p< 0.01) |
| 10 |  |  |  |                                             |
| 11 |  |  |  | Log of OOPE (PFHI)= coeff. - 0.50 (p< 0.01) |
| 12 |  |  |  |                                             |
| 13 |  |  |  | CHE10 (PMJAY)= coeff. 0.02 (p=0.52)         |
| 14 |  |  |  |                                             |
| 15 |  |  |  | CHE10 (PFHI)= coeff. 0.003 (p=0.90)         |
| 16 |  |  |  |                                             |
| 17 |  |  |  | CHE25 (PMJAY)= coeff. 0.05 (p=0.08)         |
| 18 |  |  |  |                                             |
| 19 |  |  |  | CHE25 (PFHI)= coeff. 0.02 (p=0.33)          |
| 20 |  |  |  |                                             |
| 21 |  |  |  | CHE40 (PMJAY)= coeff. 0.04 (p=0.14)         |
| 22 |  |  |  |                                             |
| 23 |  |  |  | CHE40 (PFHI)= coeff. 0.01 (p=0.36)          |
| 24 |  |  |  |                                             |
| 25 |  |  |  | D) IV model                                 |
| 26 |  |  |  |                                             |
| 27 |  |  |  | OOPE (PMJAY)= coeff. 48,734 (p=0.59)        |
| 28 |  |  |  |                                             |
| 29 |  |  |  | OOPE (PFHI)= coeff. 17,315 (p=0.72)         |
| 30 |  |  |  |                                             |
| 31 |  |  |  | Log of OOPE (PMJAY)= coeff. -0.48 (p=0.86)  |
| 32 |  |  |  |                                             |
| 33 |  |  |  | Log of OOPE (PFHI)= coeff. 1.01 (p=0.53)    |
| 34 |  |  |  |                                             |
| 35 |  |  |  | CHE10 (PMJAY)= coeff. -4.39 (p=0.28)        |
| 36 |  |  |  |                                             |
| 37 |  |  |  | CHE10 (PFHI)= coeff. -2.23 (p=0.23)         |
| 38 |  |  |  |                                             |
| 39 |  |  |  |                                             |
| 40 |  |  |  |                                             |
| 41 |  |  |  |                                             |
| 42 |  |  |  |                                             |
| 43 |  |  |  |                                             |
| 44 |  |  |  |                                             |
| 45 |  |  |  |                                             |
| 46 |  |  |  |                                             |
| 47 |  |  |  |                                             |

|                                                 |                                                                         |                                                                                                                                                                                                                                                                                                                                 |                                                                                                                                                                                                                                                                   |                                                                                                                                                                                                                                                                                                                                                                                                                                                                                                                                      |
|-------------------------------------------------|-------------------------------------------------------------------------|---------------------------------------------------------------------------------------------------------------------------------------------------------------------------------------------------------------------------------------------------------------------------------------------------------------------------------|-------------------------------------------------------------------------------------------------------------------------------------------------------------------------------------------------------------------------------------------------------------------|--------------------------------------------------------------------------------------------------------------------------------------------------------------------------------------------------------------------------------------------------------------------------------------------------------------------------------------------------------------------------------------------------------------------------------------------------------------------------------------------------------------------------------------|
|                                                 |                                                                         |                                                                                                                                                                                                                                                                                                                                 |                                                                                                                                                                                                                                                                   | CHE25 (PMJAY)= coeff. -2.03 (p=0.54)<br>CHE25 (PFHI)= coeff. -1.28 (p=0.48)<br>CHE40 (PMJAY)= coeff. -0.67 (p=0.85)<br>CHE40 (PFHI)= coeff. -0.68 (p=0.74)                                                                                                                                                                                                                                                                                                                                                                           |
| <b>Garg, Chowdhury &amp; Sundararaman, 2019</b> | Secondary data analysis of the two rounds of NSS cross-sectional survey | The 60 <sup>th</sup> round of NSSO (2004) and 71 <sup>st</sup> round of NSSO (2014) in three states of Andhra Pradesh, Karnataka and Tamil Nadu.<br><br>Instrument Variable (IV) method was used in the multivariate analysis<br><br>Two-step least square (2sls) for OOPE and Two-step IV Probit model for Utilization and CHE | PFHI covered: The three Public Funded Health Insurance (PFHI) Schemes operational in Andhra Pradesh (Rajiv Arogyashree or the NTR Vaidya Seva); Karnataka (Vajpayee Arogya Shree); Tamil Nadu (Tamil Nadu Chief Minister’s Comprehensive Health Insurance Scheme) | <b>A) Mean OOPE for hospitalization episodes (in INR) Andhra Pradesh</b><br><br>2004: Public Hospital 5042 (95% CI=4110–5976); Private hospital 19,657 (95% CI=17302–22,013)<br><br>2014:<br>PFHI enrolled: Public hospital 2864 (95% CI=1725–4004); Private hospital 15,827 (95% CI=14570–17,084)<br><br>Non enrolled: Public hospital 2355 (95% CI=1714–2998); Private hospital 17,934 (15676–20,194)<br><br><b>Karnataka:</b><br><br>2004: Public hospital 4511 (95% CI=3794–5229); Private hospital 18,085 (95% CI=16111–20,058) |

|  |  |  |                                                                        |                                                                                                                                                                                                                                                                                                                                                                                                                                                                                                                                                                                                                                                                                                       |
|--|--|--|------------------------------------------------------------------------|-------------------------------------------------------------------------------------------------------------------------------------------------------------------------------------------------------------------------------------------------------------------------------------------------------------------------------------------------------------------------------------------------------------------------------------------------------------------------------------------------------------------------------------------------------------------------------------------------------------------------------------------------------------------------------------------------------|
|  |  |  | <p>The pre PFHI in 2004 and post PFHI (2014) comparisons were made</p> | <p>2014:<br/>         PFHI enrolled: Public hospital 2888 (95% CI=1551–4226); Private hospital 16,121 (95% CI=12482–19,760)<br/>         Non enrolled: Public hospital 3556 (95% CI=3030–4082); Private hospital 17,873 (95% CI=16489–19,258)<br/> <b>Tamil Nadu</b><br/>         2004: Public hospital 3291 (95% CI=1873–4710); private hospital 24,637 (95% CI=20752–28,522)<br/>         2014:<br/>         PFHI enrolled: Public hospital 802 (95% CI=611–993); Private hospital 23,966 (95% CI=21060–26,872)<br/>         Non enrolled: Public hospital 954 (95% CI=788–1120); private hospital 26,425 (95% CI=24140–28,711)<br/> <b>B) Median OOPE for hospitalization episode (in INR)</b></p> |
|--|--|--|------------------------------------------------------------------------|-------------------------------------------------------------------------------------------------------------------------------------------------------------------------------------------------------------------------------------------------------------------------------------------------------------------------------------------------------------------------------------------------------------------------------------------------------------------------------------------------------------------------------------------------------------------------------------------------------------------------------------------------------------------------------------------------------|



1  
2  
3  
4  
5  
6  
7  
8  
9  
10  
11  
12  
13  
14  
15  
16  
17  
18  
19  
20  
21  
22  
23  
24  
25  
26  
27  
28  
29  
30  
31  
32  
33  
34  
35  
36  
37  
38  
39  
40  
41  
42  
43  
44  
45  
46  
47

|  |  |  |  |                                                                                                                                                                                                                                                                                                                                                                                                                                                                                                                                                                                                                                                                                                           |
|--|--|--|--|-----------------------------------------------------------------------------------------------------------------------------------------------------------------------------------------------------------------------------------------------------------------------------------------------------------------------------------------------------------------------------------------------------------------------------------------------------------------------------------------------------------------------------------------------------------------------------------------------------------------------------------------------------------------------------------------------------------|
|  |  |  |  | <p><b>Andhra Pradesh</b></p> <p>2004: Public Hospital 1660 (95%CI=1461–1853); Private hospital 9900 (95%CI=9020–10,719)</p> <p>2014:</p> <p>PFHI enrolled: Public Hospital 600 (95%CI=500–850); Private hospital 10,493 (95%CI=9894–11,303)</p> <p>Non enrolled: Public hospital 925 (95%CI=600–1140); Private hospital 12,130 (95%CI=10990–13,500)</p> <p><b>Karnataka</b></p> <p>2004: Public hospital 2027 (95%CI=1667–2437); private hospital 8800 (95%CI=7700–9612)</p> <p>2014</p> <p>PFHI enrolled: Public hospital 1140 (95%CI=817–1914); private hospital 8800 (95%CI=7239–10,835)</p> <p>Non-enrolled: Public Hospital 1975 (95%CI=1700–2250); private hospital 10,625 (95%CI=10000–11,400)</p> |
|--|--|--|--|-----------------------------------------------------------------------------------------------------------------------------------------------------------------------------------------------------------------------------------------------------------------------------------------------------------------------------------------------------------------------------------------------------------------------------------------------------------------------------------------------------------------------------------------------------------------------------------------------------------------------------------------------------------------------------------------------------------|

For peer review only

|  |  |  |  |                                                                                                                                                                                                                                                                                                                                                                                                                                                                                                                                                                                                                                                                                                                                                |
|--|--|--|--|------------------------------------------------------------------------------------------------------------------------------------------------------------------------------------------------------------------------------------------------------------------------------------------------------------------------------------------------------------------------------------------------------------------------------------------------------------------------------------------------------------------------------------------------------------------------------------------------------------------------------------------------------------------------------------------------------------------------------------------------|
|  |  |  |  | <p><b>Tamil Nadu</b></p> <p>2004: Public Hospital 535 (95% CI=466–629); private hospital 10,718 (95% CI=9602–11,271)</p> <p>2014</p> <p>PFHI enrolled: Public hospital 370 (95% CI=300–500); private hospital 15,450 (95% CI=13900–17,584)</p> <p>Non-enrolled: Public hospital 350 (95% CI=300–400); private hospital 15,095 (95% CI=14000–15,771)</p> <p><b>C) Proportion of individuals incurred CHE25 (Catastrophic Health expenditure 25% of annual household consumption expenditure) for Hospitalization Episode (%)</b></p> <p><b>Andhra Pradesh</b></p> <p>2004: Public 6.4 (95% CI=4.6–8.2); private 24.7 (95% CI=22.6–26.8)</p> <p>2014:</p> <p>For PFHI enrolled: Public 2.7 (95% CI=1.1–4.4); Private 17.7 (95% CI=15.3–20.1)</p> |
|--|--|--|--|------------------------------------------------------------------------------------------------------------------------------------------------------------------------------------------------------------------------------------------------------------------------------------------------------------------------------------------------------------------------------------------------------------------------------------------------------------------------------------------------------------------------------------------------------------------------------------------------------------------------------------------------------------------------------------------------------------------------------------------------|

1  
2  
3  
4  
5  
6  
7  
8  
9  
10  
11  
12  
13  
14  
15  
16  
17  
18  
19  
20  
21  
22  
23  
24  
25  
26  
27  
28  
29  
30  
31  
32  
33  
34  
35  
36  
37  
38  
39  
40  
41  
42  
43  
44  
45  
46  
47

|  |  |  |  |                                                                                                                                                                                                                                                                                                                                                                                                                                                                                                                                                                                                                                     |
|--|--|--|--|-------------------------------------------------------------------------------------------------------------------------------------------------------------------------------------------------------------------------------------------------------------------------------------------------------------------------------------------------------------------------------------------------------------------------------------------------------------------------------------------------------------------------------------------------------------------------------------------------------------------------------------|
|  |  |  |  | <p>Non enrolled: Public 1.7 (95% CI=0–3.5); private 17.1 (95% CI=14.5–19.8)</p> <p><b>Karnataka</b></p> <p>2004: public 5.1 (95%CI=3.2–7.0); private 23.9 (95% CI=21.2–26.6)</p> <p>2014</p> <p>For PFHI enrolled: Public 2.2 (95%CI=0–5.8); private 20.0 (95%CI=13.1–26.9)</p> <p>Non enrolled: Public 3.1 (95%CI=1.9–4.4); 22.6 (95%CI=20.6–24.5)</p> <p><b>Tamil Nadu</b></p> <p>2004: Public 2.4 (95% CI=1.5–3.4); private 27.4 (95% CI=25.2–29.7)</p> <p>2014</p> <p>For PFHI enrolled: Public 0 (95%CI=0–0); private 27.2 (95%CI=23.1–31.4)</p> <p>Non-enrolled: Public 0.3 (95%CI=0–0.6); private 29.3 (95%CI=27.2–31.5)</p> |
|--|--|--|--|-------------------------------------------------------------------------------------------------------------------------------------------------------------------------------------------------------------------------------------------------------------------------------------------------------------------------------------------------------------------------------------------------------------------------------------------------------------------------------------------------------------------------------------------------------------------------------------------------------------------------------------|

For peer review only

|  |  |  |  |                                                                                                                                                                                                                                                                                                                                                                                                                                                                                                                                                                                                                                                            |
|--|--|--|--|------------------------------------------------------------------------------------------------------------------------------------------------------------------------------------------------------------------------------------------------------------------------------------------------------------------------------------------------------------------------------------------------------------------------------------------------------------------------------------------------------------------------------------------------------------------------------------------------------------------------------------------------------------|
|  |  |  |  | <p><b>D) Proportion of individuals incurred CHE40 for hospitalization episode (%)</b></p> <p><b>Andhra Pradesh</b></p> <p>2004: Public 3 (95% CI=1.7–4.2); private 13.7 (95% CI=12.0–15.4)</p> <p>2014</p> <p>For PFHI enrolled: Public 0.2 (95% CI=0–0.7); private 9.4 (95% CI=7.6–11.3)</p> <p>Non-enrolled: Public 0 (95% CI=0–0); private 8.7 (95% CI=6.7–10.7)</p> <p><b>Karnataka</b></p> <p>2004: Public 2.6 (95% CI=1.2–4.0); private 12.5 (95% CI=10.3–14.6)</p> <p>2014:</p> <p>For PFHI enrolled: Public 0.8 (95% CI=0–3); private 11.3 (95% CI=5.8–16.8)</p> <p>Non-enrolled: Public 1.7 (95% CI=0.8–2.6); private 11.8 (95% CI=10.3–13.3)</p> |
|--|--|--|--|------------------------------------------------------------------------------------------------------------------------------------------------------------------------------------------------------------------------------------------------------------------------------------------------------------------------------------------------------------------------------------------------------------------------------------------------------------------------------------------------------------------------------------------------------------------------------------------------------------------------------------------------------------|

1  
2  
3  
4  
5  
6  
7  
8  
9  
10  
11  
12  
13  
14  
15  
16  
17  
18  
19  
20  
21  
22  
23  
24  
25  
26  
27  
28  
29  
30  
31  
32  
33  
34  
35  
36  
37  
38  
39  
40  
41  
42  
43  
44  
45  
46  
47

|  |  |  |  |                                                                                                                                                                                                                                                                                                                                                                                                                                                                                                                                                                                                                                                   |
|--|--|--|--|---------------------------------------------------------------------------------------------------------------------------------------------------------------------------------------------------------------------------------------------------------------------------------------------------------------------------------------------------------------------------------------------------------------------------------------------------------------------------------------------------------------------------------------------------------------------------------------------------------------------------------------------------|
|  |  |  |  | <p><b>Tamil Nadu</b></p> <p>2004: Public 1.5 (95%CI=0.7–2.2); private 17 (95%CI=15.1–18.9)</p> <p>2014</p> <p>For PFHI enrolled: Public 0 (95%CI=0–0); private 14.7 (95%CI=11.4–18.0)</p> <p>Non-enrolled: Public 0 (95%CI=0–0); 14.4 (95%CI=12.7–16.0)</p> <p><b>E) Proportion of individuals incurred CHE10 for hospitalization episode (%)</b></p> <p><b>Andhra Pradesh</b></p> <p>2004: Public 17.9 (95%CI=15.1-20.7); private 53.6 (95%CI=51.2 – 56.1)</p> <p>2014</p> <p>For PFHI enrolled: Public 8.7 (95% CI=5.8-11.6); private 51 (95%CI=47.8-54.2)</p> <p>Non-enrolled: Public 7.3 (95%CI=3.5-11.2); private 50.9 (95%CI=47.4-54.4)</p> |
|--|--|--|--|---------------------------------------------------------------------------------------------------------------------------------------------------------------------------------------------------------------------------------------------------------------------------------------------------------------------------------------------------------------------------------------------------------------------------------------------------------------------------------------------------------------------------------------------------------------------------------------------------------------------------------------------------|

For peer review only

|    |  |  |  |                                                      |
|----|--|--|--|------------------------------------------------------|
| 1  |  |  |  |                                                      |
| 2  |  |  |  |                                                      |
| 3  |  |  |  | <b>Karnataka</b>                                     |
| 4  |  |  |  |                                                      |
| 5  |  |  |  | 2004: Public 20.3 (95%CI=16.8-23.8); private 49.6    |
| 6  |  |  |  | (95%CI=46.5-52.8)                                    |
| 7  |  |  |  |                                                      |
| 8  |  |  |  | 2014                                                 |
| 9  |  |  |  |                                                      |
| 10 |  |  |  |                                                      |
| 11 |  |  |  | For PFHI enrolled: Public 8 (95%CI=1.4-14.5);        |
| 12 |  |  |  |                                                      |
| 13 |  |  |  | private 43.1 (95%CI=34.5-51.7)                       |
| 14 |  |  |  |                                                      |
| 15 |  |  |  | Non-enrolled: Public 11.5 (95%CI=9.3-13.9); private  |
| 16 |  |  |  | 53.2 (95%CI=50.9-55.5)                               |
| 17 |  |  |  |                                                      |
| 18 |  |  |  | <b>Tamil Nadu</b>                                    |
| 19 |  |  |  |                                                      |
| 20 |  |  |  | 2004: Public 8 (95%CI=6.3-9.7); private 50           |
| 21 |  |  |  |                                                      |
| 22 |  |  |  | (95%CI=47.4-52.5)                                    |
| 23 |  |  |  |                                                      |
| 24 |  |  |  | 2014                                                 |
| 25 |  |  |  |                                                      |
| 26 |  |  |  | For PFHI enrolled: Public 0.7 (95%CI=0-1.9); Private |
| 27 |  |  |  |                                                      |
| 28 |  |  |  | 59.3 (95%CI=54.7-63.9)                               |
| 29 |  |  |  |                                                      |
| 30 |  |  |  | Non enrolled: Public 1.2 (95%CI=0.6-1.8); private    |
| 31 |  |  |  |                                                      |
| 32 |  |  |  | 58.3 (95%CI=55.9-60.6)                               |
| 33 |  |  |  |                                                      |
| 34 |  |  |  | <b>F) 2sls regression for size of OOPE for</b>       |
| 35 |  |  |  | <b>hospitalization</b>                               |
| 36 |  |  |  |                                                      |
| 37 |  |  |  |                                                      |
| 38 |  |  |  |                                                      |
| 39 |  |  |  |                                                      |
| 40 |  |  |  |                                                      |
| 41 |  |  |  |                                                      |
| 42 |  |  |  |                                                      |
| 43 |  |  |  |                                                      |
| 44 |  |  |  |                                                      |
| 45 |  |  |  |                                                      |
| 46 |  |  |  |                                                      |
| 47 |  |  |  |                                                      |

1  
2  
3  
4  
5  
6  
7  
8  
9  
10  
11  
12  
13  
14  
15  
16  
17  
18  
19  
20  
21  
22  
23  
24  
25  
26  
27  
28  
29  
30  
31  
32  
33  
34  
35  
36  
37  
38  
39  
40  
41  
42  
43  
44  
45  
46  
47

|  |  |  |  |                                                                                                                                                                                                                                                                                                                                                                                                                                                                                                                                                                                                                                                                                                   |
|--|--|--|--|---------------------------------------------------------------------------------------------------------------------------------------------------------------------------------------------------------------------------------------------------------------------------------------------------------------------------------------------------------------------------------------------------------------------------------------------------------------------------------------------------------------------------------------------------------------------------------------------------------------------------------------------------------------------------------------------------|
|  |  |  |  | <p>PFHI enrolment was not associated with the size of OOPE in any of the three states</p> <p>Andhra Pradesh</p> <p>Government insurance(yes)= coeff 2944.541 (SE= 35372.290, 95% CI= -66383.880 to 72272.960)</p> <p>Karnataka</p> <p>Government insurance (yes)= coeff 45744.550 (SE= 34789.840; 95% CI= -22442.280 to 113931.400)</p> <p>Tamil Nadu</p> <p>Government insurance (yes)= coef 63942.380(SE= 49332.880; 95% CI= - 32748.280 to 160633.000)</p> <p><b>G) Association between government insurance and CHE25</b></p> <p>Enrolment in PFHI schemes was not significantly associated with incidence of CH25</p> <p>Andhra Pradesh: coef 1.407(SE= 0.881; 95% CI= - 0.319 TO 3.134)</p> |
|--|--|--|--|---------------------------------------------------------------------------------------------------------------------------------------------------------------------------------------------------------------------------------------------------------------------------------------------------------------------------------------------------------------------------------------------------------------------------------------------------------------------------------------------------------------------------------------------------------------------------------------------------------------------------------------------------------------------------------------------------|

For peer review only

|  |  |  |  |                                                                                                                                                                                                                                                                                                                                                                                                                                                                                                                                                                                                        |
|--|--|--|--|--------------------------------------------------------------------------------------------------------------------------------------------------------------------------------------------------------------------------------------------------------------------------------------------------------------------------------------------------------------------------------------------------------------------------------------------------------------------------------------------------------------------------------------------------------------------------------------------------------|
|  |  |  |  | <p>Karnataka: coef 2.463 (SE= 2.279; 95%CI= -2.003 to 6.929)</p> <p>Tamil Nadu: coef 1.58(SE= 1.859; 95%CI= -2.063 to 5.223)</p> <p><b>H) Association between government insurance and CHE40</b></p> <p>Enrolment in PFHI schemes was not significantly associated with incidence of CHE40 in all the three states</p> <p>Andhra Pradesh: coef -1.788 (SE= 1.171; 95%CI= -4.084 to 0.508)</p> <p>Karnataka: coef. 0.788 (SE= 2.668; 95%CI= -4.440 to 6.016)</p> <p>Tamil Nadu: coef. 1.653 (SE= 2.099; 95%CI= -2.462 to 5.768)</p> <p><b>I) Association between government insurance and CHE10</b></p> |
|--|--|--|--|--------------------------------------------------------------------------------------------------------------------------------------------------------------------------------------------------------------------------------------------------------------------------------------------------------------------------------------------------------------------------------------------------------------------------------------------------------------------------------------------------------------------------------------------------------------------------------------------------------|



1  
2  
3  
4  
5  
6  
7  
8  
9  
10  
11  
12  
13  
14  
15  
16  
17  
18  
19  
20  
21  
22  
23  
24  
25  
26  
27  
28  
29  
30  
31  
32  
33  
34  
35  
36  
37  
38  
39  
40  
41  
42  
43  
44  
45  
46  
47

|  |  |  |  |                                                                                                                                                                                                                                                                                                                                                                                                                                                                                                                                                                                                                                                                                                                       |
|--|--|--|--|-----------------------------------------------------------------------------------------------------------------------------------------------------------------------------------------------------------------------------------------------------------------------------------------------------------------------------------------------------------------------------------------------------------------------------------------------------------------------------------------------------------------------------------------------------------------------------------------------------------------------------------------------------------------------------------------------------------------------|
|  |  |  |  | <p>Enrolment in PFHI schemes was not significantly associated with incidence of CHE10 in all the three states</p> <p>Andhra Pradesh: coef. -1.35178 (SE= 0.8440585; 95% CI= -3.006104 to 0.3025442)</p> <p>Karnataka= coef. 3.546654 (SE= 6.232684; 95% CI= -8.669182 to 15.76249)</p> <p>Tamil Nadu: coef. 1.039547(SE= 1.048903; 95% CI= -1.016266 to 3.09536)</p> <p><b>J) Association between PFHI enrolment and OOPE</b></p> <p>Andhra Pradesh: coef. - 5374 (p&lt;0.001)</p> <p>Karnataka: coef. -4064 (p&lt;0.05)</p> <p>Tamil Nadu: coef. 2665 (p&gt;0.05)</p> <p><b>K) Association between PFHI enrolment and CHE 10</b></p> <p>Andhra Pradesh: -0.235 (p&lt;0.001)</p> <p>Karnataka: -0.153 (p&gt;0.05)</p> |
|--|--|--|--|-----------------------------------------------------------------------------------------------------------------------------------------------------------------------------------------------------------------------------------------------------------------------------------------------------------------------------------------------------------------------------------------------------------------------------------------------------------------------------------------------------------------------------------------------------------------------------------------------------------------------------------------------------------------------------------------------------------------------|

|                                                 |                                                               |                                                                                                                                                            |                                                                                                                                           |                                                                                                                                                                                                                                                                                                                                                                                                                                                                                                                                                                                                                                  |
|-------------------------------------------------|---------------------------------------------------------------|------------------------------------------------------------------------------------------------------------------------------------------------------------|-------------------------------------------------------------------------------------------------------------------------------------------|----------------------------------------------------------------------------------------------------------------------------------------------------------------------------------------------------------------------------------------------------------------------------------------------------------------------------------------------------------------------------------------------------------------------------------------------------------------------------------------------------------------------------------------------------------------------------------------------------------------------------------|
|                                                 |                                                               |                                                                                                                                                            |                                                                                                                                           | <p>Tamil Nadu: <math>-0.085</math> (<math>p&gt;0.05</math>)</p> <p><b>L) Association between PFHI enrolment and CHE</b></p> <p><b>25</b></p> <p>Andhra Pradesh: <math>-0.210</math> (<math>p&lt;0.001</math>)</p> <p>Karnataka: <math>-0.083</math> (<math>p&gt;0.05</math>)</p> <p>Tamil Nadu: <math>-0.031</math> (<math>p&gt;0.05</math>)</p> <p><b>M) Association between PFHI enrolment and CHE</b></p> <p><b>40</b></p> <p>Andhra Pradesh: <math>-0.255</math> (<math>p&lt;0.001</math>)</p> <p>Karnataka: <math>-0.118</math> (<math>p&gt;0.05</math>)</p> <p>Tamil Nadu: <math>0.090</math> (<math>p&gt;0.05</math>)</p> |
| <p><b>Johnson, &amp; Krishnaswamy, 2012</b></p> | <p>Secondary data analysis of the two rounds of NSSO data</p> | <p>NSSO round 61 (conducted in 2004-05) and round 66 (conducted in 2009-10) as pre and post surveys Excluding Andhra Pradesh, Karnataka and Tamil Nadu</p> | <p>PFHI covered: RSBY</p> <p><b>Treatment group= RSBY</b> treated districts</p> <p>*A household is deemed treated if the policy start</p> | <p><b>1) Impact of RSBY (without household matching)</b></p> <p><b>A) OP expenditure (in Rs)</b></p> <p>Triple diff= <math>-4.478</math> (<math>p&lt;0.05</math>)</p> <p>DID= <math>-4.716</math> (<math>p&lt;0.01</math>)</p> <p><b>B) IP expenditure (in Rs)</b></p> <p>Triple diff.= <math>-8.938</math> (<math>p&gt;0.1</math> i.e. <math>0.104</math>)</p> <p>DID= <math>1.106</math> (<math>P&gt;0.1</math> I.e. <math>p=0.461</math>)</p>                                                                                                                                                                                 |

1  
2  
3  
4  
5  
6  
7  
8  
9  
10  
11  
12  
13  
14  
15  
16  
17  
18  
19  
20  
21  
22  
23  
24  
25  
26  
27  
28  
29  
30  
31  
32  
33  
34  
35  
36  
37  
38  
39  
40  
41  
42  
43  
44  
45  
46  
47

|  |  |                                                                                                                                                                  |                                                                                                                                                                                                                                                                                                                                                                        |                                                                                                                                                                                                                                                                                                                                                                                                                                                                                                                                                                                                                                                                                                                                                                  |
|--|--|------------------------------------------------------------------------------------------------------------------------------------------------------------------|------------------------------------------------------------------------------------------------------------------------------------------------------------------------------------------------------------------------------------------------------------------------------------------------------------------------------------------------------------------------|------------------------------------------------------------------------------------------------------------------------------------------------------------------------------------------------------------------------------------------------------------------------------------------------------------------------------------------------------------------------------------------------------------------------------------------------------------------------------------------------------------------------------------------------------------------------------------------------------------------------------------------------------------------------------------------------------------------------------------------------------------------|
|  |  | <p>-Difference in differences analysis</p> <p>-Triple difference analysis (non BPL households as a second control)</p> <p>-Coarsened exact matching approach</p> | <p>date in that district was two month prior to the date of the interview in order to give the household sufficient time to undergo a procedure</p> <p><b>Control 1</b>= those districts where RSBY was planned (and an insurer identified), but not launched at the time of the survey</p> <p><b>Control 2</b>= districts where RSBY was not planned at the time.</p> | <p>C) Total Medical Exp. (in Rs.)<br/>Triple diff.= -13.42 (p&lt;0.05 i.e. p= 0.046)<br/>DID= -3.610 (P&lt;0.05 I.e. p= 0.025)</p> <p>D) Was hospitalized<br/>Triple diff.= 0.0249 (p&lt;0.05 i.e. p= (0.018)<br/>DID= 0.0157 (P&gt;0.1 I.e. p= 0.473)</p> <p><b>2) For duration of treatment model (without household matching)</b></p> <p>A) OP expenditure (in Rs)<br/>Triple diff.= -0.230 (p&gt;0.1 i.e. p= 0.357)<br/>DID= -0.280 (P&lt;0.05 I.e. p= 0.033)</p> <p>B) IP expenditure (in Rs)<br/>Triple diff.= -0.811 (p&lt;0.1 i.e. 0.066)<br/>DID= - 0.00277 (P&gt;0.1 I.e. p= (0.984)</p> <p>C) Total Medical Exp. (in Rs.)<br/>Triple diff.= - 1.041 (p&lt;0.1 i.e. p= (0.075)<br/>DID= -0.282 (P&lt;0.1 I.e. p= 0.076)</p> <p>D) Was hospitalized</p> |
|--|--|------------------------------------------------------------------------------------------------------------------------------------------------------------------|------------------------------------------------------------------------------------------------------------------------------------------------------------------------------------------------------------------------------------------------------------------------------------------------------------------------------------------------------------------------|------------------------------------------------------------------------------------------------------------------------------------------------------------------------------------------------------------------------------------------------------------------------------------------------------------------------------------------------------------------------------------------------------------------------------------------------------------------------------------------------------------------------------------------------------------------------------------------------------------------------------------------------------------------------------------------------------------------------------------------------------------------|

1  
2  
3  
4  
5  
6  
7  
8  
9  
10  
11  
12  
13  
14  
15  
16  
17  
18  
19  
20  
21  
22  
23  
24  
25  
26  
27  
28  
29  
30  
31  
32  
33  
34  
35  
36  
37  
38  
39  
40  
41  
42  
43  
44  
45  
46  
47

|  |  |  |                                                                                                                                                                             |                                                                                                                                                                                                                                                                                                                                                                                                                                                                                                                                                                                                                                                                                                                                                                                                                                                                                                                                                                                          |
|--|--|--|-----------------------------------------------------------------------------------------------------------------------------------------------------------------------------|------------------------------------------------------------------------------------------------------------------------------------------------------------------------------------------------------------------------------------------------------------------------------------------------------------------------------------------------------------------------------------------------------------------------------------------------------------------------------------------------------------------------------------------------------------------------------------------------------------------------------------------------------------------------------------------------------------------------------------------------------------------------------------------------------------------------------------------------------------------------------------------------------------------------------------------------------------------------------------------|
|  |  |  | <p>297 control and 204 treatment districts with a total of 186,065 households. Out of these, 102,810 are from the PRE intervention round and 83,255 from the POST round</p> | <p>Triple diff.= 0.00299 (p&lt;0.01 i.e. p= 0.006)<br/>                 DID= 0.000672 (P&gt;0.1 I.e. p= 0.720)<br/> <b>3) Impact of RSBY (for matched districts and households)</b><br/>                 A) OP expenditure (in Rs)<br/>                 Triple diff.= -3.767 (p&lt;0.1 i.e. p= 0.071)<br/>                 DID= - 4.934 (P&lt;0.01 I.e. p= 0.001)<br/>                 B) IP expenditure (in Rs)<br/>                 Triple diff.= -7.683 (p&gt;0.1 i.e. 0.143)<br/>                 DID= 1.183 (P&gt;0.1 I.e. p= 0.413)<br/>                 C) Total Medical Exp. (in Rs.)<br/>                 Triple diff.= -11.45 (p&lt;0.1 i.e. p= 0.053)<br/>                 DID= -3.751 (P&lt;0.05 I.e. p= 0.015)<br/>                 D) Was hospitalized<br/>                 Triple diff.= 0.0259 (p&lt;0.05 i.e. p= 0.019)<br/>                 DID= 0.0171 (P&gt;0.1 I.e. p= 0.437)<br/> <b>4) For duration of treatment model (matched districts and households)</b></p> |
|--|--|--|-----------------------------------------------------------------------------------------------------------------------------------------------------------------------------|------------------------------------------------------------------------------------------------------------------------------------------------------------------------------------------------------------------------------------------------------------------------------------------------------------------------------------------------------------------------------------------------------------------------------------------------------------------------------------------------------------------------------------------------------------------------------------------------------------------------------------------------------------------------------------------------------------------------------------------------------------------------------------------------------------------------------------------------------------------------------------------------------------------------------------------------------------------------------------------|

1  
2  
3  
4  
5  
6  
7  
8  
9  
10  
11  
12  
13  
14  
15  
16  
17  
18  
19  
20  
21  
22  
23  
24  
25  
26  
27  
28  
29  
30  
31  
32  
33  
34  
35  
36  
37  
38  
39  
40  
41  
42  
43  
44  
45  
46  
47

|  |  |  |  |                                                                                                                                                                                                                                                                                                                                                                                                                                                                                                                                                                                                                                                                                                                                                                                                                                                                          |
|--|--|--|--|--------------------------------------------------------------------------------------------------------------------------------------------------------------------------------------------------------------------------------------------------------------------------------------------------------------------------------------------------------------------------------------------------------------------------------------------------------------------------------------------------------------------------------------------------------------------------------------------------------------------------------------------------------------------------------------------------------------------------------------------------------------------------------------------------------------------------------------------------------------------------|
|  |  |  |  | <p><b>A) OP expenditure (in Rs)</b></p> <p>Triple diff.= -0.136 (p&gt;0.05 i.e. p= (0.511))</p> <p>DID= - 0.312 (P&lt;0.05 I.e. p= 0.025)</p> <p><b>B) IP expenditure (in Rs)</b></p> <p>Triple diff.= -0.677 (p&gt;0.1 i.e. p= 0.117)</p> <p>DID= - 0.00457 (P&gt;0.1 I.e. p= 0.972)</p> <p><b>C) Total Medical Exp. (in Rs.)</b></p> <p>Triple diff.= -0.813 (p&gt;0.1 i.e. p= 0.109)</p> <p>DID= - 0.316 (P&lt;0.05 I.e. p= 0.041)</p> <p><b>D) Was hospitalized</b></p> <p>Triple diff.= 0.00311 (p&lt;0.01 i.e. p= 0.005)</p> <p>DID= 0.000715 (P&gt;0.1 I.e. p= 0.706)</p> <p><b>5) Impact of RSBY (matched districts and households) – No Uttar Pradesh and Haryana</b></p> <p><b>A) OP expenditure (in Rs)</b></p> <p>Triple diff.= -3.650 (p&gt;0.05 i.e. p= (0.511))</p> <p>DID= - 2.878 (P&lt;0.01 I.e. p= 0.010)</p> <p><b>B) IP expenditure (in Rs)</b></p> |
|--|--|--|--|--------------------------------------------------------------------------------------------------------------------------------------------------------------------------------------------------------------------------------------------------------------------------------------------------------------------------------------------------------------------------------------------------------------------------------------------------------------------------------------------------------------------------------------------------------------------------------------------------------------------------------------------------------------------------------------------------------------------------------------------------------------------------------------------------------------------------------------------------------------------------|

For peer review only

|    |  |  |  |                                                        |
|----|--|--|--|--------------------------------------------------------|
| 1  |  |  |  | Triple diff.= -10.52 (p>0.1 i.e. p= 0.153)             |
| 2  |  |  |  | DID= 1.734 (p>0.1 I.e. p= 0.346)                       |
| 3  |  |  |  | C) Total Medical Exp. (in Rs.)                         |
| 4  |  |  |  | Triple diff.= -14.17 (p>0.1 i.e. p= 0.096)             |
| 5  |  |  |  | DID= -1.144 (P>0.1 I.e. p= 0.403)                      |
| 6  |  |  |  | D) Was hospitalized                                    |
| 7  |  |  |  | Triple diff.= 0.0269 (p<0.05 i.e. p= 0.042)            |
| 8  |  |  |  | DID= 0.0543 (P<0.1 I.e. p= 0.005)                      |
| 9  |  |  |  | <b>6) For duration of treatment model (Matched</b>     |
| 10 |  |  |  | <b>districts and households) (No Uttar Pradesh and</b> |
| 11 |  |  |  | <b>Haryana)</b>                                        |
| 12 |  |  |  | A) OP expenditure (in Rs)                              |
| 13 |  |  |  | Triple diff.= -0.186 (p>0.1 i.e. p= 0.496)             |
| 14 |  |  |  | DID= -0.122 (P>0.1 I.e. p= 0.314)                      |
| 15 |  |  |  | B) IP expenditure (in Rs)                              |
| 16 |  |  |  | Triple diff.= -0.679 (p>0.1 i.e. p= 0.292)             |
| 17 |  |  |  | DID= 0.0322 (p>0.1 I.e. p= 0.834)                      |
| 18 |  |  |  | C) Total Medical Exp. (in Rs.)                         |
| 19 |  |  |  |                                                        |
| 20 |  |  |  |                                                        |
| 21 |  |  |  |                                                        |
| 22 |  |  |  |                                                        |
| 23 |  |  |  |                                                        |
| 24 |  |  |  |                                                        |
| 25 |  |  |  |                                                        |
| 26 |  |  |  |                                                        |
| 27 |  |  |  |                                                        |
| 28 |  |  |  |                                                        |
| 29 |  |  |  |                                                        |
| 30 |  |  |  |                                                        |
| 31 |  |  |  |                                                        |
| 32 |  |  |  |                                                        |
| 33 |  |  |  |                                                        |
| 34 |  |  |  |                                                        |
| 35 |  |  |  |                                                        |
| 36 |  |  |  |                                                        |
| 37 |  |  |  |                                                        |
| 38 |  |  |  |                                                        |
| 39 |  |  |  |                                                        |
| 40 |  |  |  |                                                        |
| 41 |  |  |  |                                                        |
| 42 |  |  |  |                                                        |
| 43 |  |  |  |                                                        |
| 44 |  |  |  |                                                        |
| 45 |  |  |  |                                                        |
| 46 |  |  |  |                                                        |
| 47 |  |  |  |                                                        |

|                                       |                                                                                                                                                                                                                                         |                                                                                                                                                                                                                                                    |                                                                                                                                                                                                                                             |                                                                                                                                                                                                                                                                                                                                                                                                                                                                                                                                       |
|---------------------------------------|-----------------------------------------------------------------------------------------------------------------------------------------------------------------------------------------------------------------------------------------|----------------------------------------------------------------------------------------------------------------------------------------------------------------------------------------------------------------------------------------------------|---------------------------------------------------------------------------------------------------------------------------------------------------------------------------------------------------------------------------------------------|---------------------------------------------------------------------------------------------------------------------------------------------------------------------------------------------------------------------------------------------------------------------------------------------------------------------------------------------------------------------------------------------------------------------------------------------------------------------------------------------------------------------------------------|
|                                       |                                                                                                                                                                                                                                         |                                                                                                                                                                                                                                                    |                                                                                                                                                                                                                                             | <p>Triple diff.= -0.865 (p&gt;0.1 i.e. p= 0.241)</p> <p>DID= -0.0895 (P&gt;0.1 I.e. p= 0.560)</p> <p>D) Was hospitalized</p> <p>Triple diff.= 0.00419 (p&lt;0.01 i.e. p= 0.000)</p> <p>DID= 0.00349 (P&lt;0.1 I.e. p= 0.076)</p> <p>Note: OP exp, IP Exp and Total exp. are per capita per month</p>                                                                                                                                                                                                                                  |
| <p><b>Karan, Yip, Mahal, 2017</b></p> | <p>-Three repeated cross section HH Surveys</p> <p>-Difference-in-differences (DID) methods were used to evaluate the causal impacts of RSBY</p> <p>-'intention to treat' (ITT) effect</p> <p>-propensity-score matching, to create</p> | <p>Three waves of HH 'Consumer Expenditure Surveys' (CES): 1999-2000 (pre-intervention= T1), 2004-5 (T2) &amp; 2011-2 (post-intervention= T3), conducted by the NSSO.</p> <p>Sample size in three rounds ranged from: 100,000 and 125,000 HHs.</p> | <p>PFHI covered: RSBY implementation began in 2008-09.</p> <p><b>Treatment group:</b> Poor HHs in RSBY implementing districts.</p> <p><b>Control:</b> Poor in non-RSBY districts.</p> <p>Poor: belonging to the two poorest expenditure</p> | <p><b>Districts which began participating in RSBY on or before March 2010 (treat 1)</b></p> <p><b>1) IP OOP:</b></p> <p>Pre-intervention DID coefficient estimates are not statistically significant for all outcomes of interest.</p> <p>A) RSBY increased statistically insignificant likelihood of incurring any inpatient OOP in the treatment group 'treat1' by 22% relative to Controls (OR: 1.223, SE: 0.2777).</p> <p>B) Conditional on having positive IP OOP, the HH OOP spending per person remained unchanged for the</p> |

|  |                                                                                                                          |  |                                          |                                                                                                                                                                                                                                                                                                                                                                                                                                                                                                                                                                                                                                                                                                                                                                                                                                          |
|--|--------------------------------------------------------------------------------------------------------------------------|--|------------------------------------------|------------------------------------------------------------------------------------------------------------------------------------------------------------------------------------------------------------------------------------------------------------------------------------------------------------------------------------------------------------------------------------------------------------------------------------------------------------------------------------------------------------------------------------------------------------------------------------------------------------------------------------------------------------------------------------------------------------------------------------------------------------------------------------------------------------------------------------------|
|  | <p>comparable treatment and control districts using pooled data from the two pre-intervention years (2000 and 2005).</p> |  | <p>quintiles as a proxy for BPL HHs.</p> | <p>treatment compared to controls (Difference in pre-post: 0.005, SE: 0.212).</p> <p>C) No effect of the scheme on the share of IP OOP spending in total HH expenditures for the ‘treat1’ group (DID coefficients: -0.007, SE: 0.0079).</p> <p>D) RSBY lowers the likelihood of experiencing catastrophic IP OOP spending by 26%, the effect is not statistically significant (OR: 0.743, SE: 0.2272).</p> <p><b>2) OP OOP:</b></p> <p>A) RSBY increased the likelihood of incurring OP OOP in treatment HHs by 23% (OR: 1.226, SE: 0.1806);</p> <p>B) Per person OP OOP (conditional on reporting any OP OOP) declined by 5% in 2012 and these impacts were statistically significant (Difference: -0.049, SE: 0.0580).</p> <p>C) RSBY did not affect the share of OP OOP in total spending (DID coefficient: - 0.004, SE: 0.0028).</p> |
|--|--------------------------------------------------------------------------------------------------------------------------|--|------------------------------------------|------------------------------------------------------------------------------------------------------------------------------------------------------------------------------------------------------------------------------------------------------------------------------------------------------------------------------------------------------------------------------------------------------------------------------------------------------------------------------------------------------------------------------------------------------------------------------------------------------------------------------------------------------------------------------------------------------------------------------------------------------------------------------------------------------------------------------------------|



1  
2  
3  
4  
5  
6  
7  
8  
9  
10  
11  
12  
13  
14  
15  
16  
17  
18  
19  
20  
21  
22  
23  
24  
25  
26  
27  
28  
29  
30  
31  
32  
33  
34  
35  
36  
37  
38  
39  
40  
41  
42  
43  
44  
45  
46  
47

|  |  |  |  |                                                                                                                                                                                                                                                                                                                                                                                                                                                                                                                                                                                                                                                                                                                                                                                                                                                                                                    |
|--|--|--|--|----------------------------------------------------------------------------------------------------------------------------------------------------------------------------------------------------------------------------------------------------------------------------------------------------------------------------------------------------------------------------------------------------------------------------------------------------------------------------------------------------------------------------------------------------------------------------------------------------------------------------------------------------------------------------------------------------------------------------------------------------------------------------------------------------------------------------------------------------------------------------------------------------|
|  |  |  |  | <p>D) The probability of catastrophic OP OOP among treat1 HHs was lower by 11% (OR: 0.891, SE: 0.1425) but remained statistically insignificant.</p> <p><b>3) Total OOP:</b></p> <p>Total OOP spending showed mostly statistically insignificant differences in the changes in all the four OOP indicators between treatment and control groups, excepting 30% (OR: 1.298, SE: 0.2013) increase in probability of any OOP payments in treat1</p> <p><b>4) Nonmedical expenditure of households:</b> RSBY increased nonmedical expenditure of HHs in the treat1 group by 5%</p> <p><b>5) Drug and non-drug expenditure:</b> RSBY did not affect the likelihood of incurring both drug and non-drug IP OOP. However, conditional on positive non-drug OOP, the level of OOP was 27% higher among treat1 households after RSBY was introduced, and this difference was statistically significant.</p> |
|--|--|--|--|----------------------------------------------------------------------------------------------------------------------------------------------------------------------------------------------------------------------------------------------------------------------------------------------------------------------------------------------------------------------------------------------------------------------------------------------------------------------------------------------------------------------------------------------------------------------------------------------------------------------------------------------------------------------------------------------------------------------------------------------------------------------------------------------------------------------------------------------------------------------------------------------------|

For peer review only

|    |  |  |  |                                                           |
|----|--|--|--|-----------------------------------------------------------|
| 1  |  |  |  |                                                           |
| 2  |  |  |  |                                                           |
| 3  |  |  |  |                                                           |
| 4  |  |  |  | <b>Districts which began participating between April</b>  |
| 5  |  |  |  | <b>2010 and March 2012 (treat 2)</b>                      |
| 6  |  |  |  |                                                           |
| 7  |  |  |  | <b>1) IP OOP:</b>                                         |
| 8  |  |  |  |                                                           |
| 9  |  |  |  | A) RSBY increased the probability of incurring any IP     |
| 10 |  |  |  | OOP by 28% (OR: 1.281, SE: 0.3201) and                    |
| 11 |  |  |  |                                                           |
| 12 |  |  |  | B) lowered per member OOP IP expenditure                  |
| 13 |  |  |  | (conditional on reporting any IP OOP) by 16%              |
| 14 |  |  |  |                                                           |
| 15 |  |  |  | (Difference: - 0.164, SE: 0.2175), but were statistically |
| 16 |  |  |  | insignificant.                                            |
| 17 |  |  |  |                                                           |
| 18 |  |  |  | C) No impact of RSBY on IP OOP as a share of total        |
| 19 |  |  |  | HH spending in ‘treat2’ HHs (DID coefficient: -0.008,     |
| 20 |  |  |  | SE: 0.0081).                                              |
| 21 |  |  |  |                                                           |
| 22 |  |  |  | D) RSBY lowered the probability of incurring any          |
| 23 |  |  |  | catastrophic inpatient OOP by almost 9% (OR: 0.911,       |
| 24 |  |  |  | SE: 0.3162) in ‘treat2’ HHs, but this was statistically   |
| 25 |  |  |  | insignificant.                                            |
| 26 |  |  |  |                                                           |
| 27 |  |  |  | <b>2) OP OOP:</b>                                         |
| 28 |  |  |  |                                                           |
| 29 |  |  |  |                                                           |
| 30 |  |  |  |                                                           |
| 31 |  |  |  |                                                           |
| 32 |  |  |  |                                                           |
| 33 |  |  |  |                                                           |
| 34 |  |  |  |                                                           |
| 35 |  |  |  |                                                           |
| 36 |  |  |  |                                                           |
| 37 |  |  |  |                                                           |
| 38 |  |  |  |                                                           |
| 39 |  |  |  |                                                           |
| 40 |  |  |  |                                                           |
| 41 |  |  |  |                                                           |
| 42 |  |  |  |                                                           |
| 43 |  |  |  |                                                           |
| 44 |  |  |  |                                                           |
| 45 |  |  |  |                                                           |
| 46 |  |  |  |                                                           |
| 47 |  |  |  |                                                           |

1  
2  
3  
4  
5  
6  
7  
8  
9  
10  
11  
12  
13  
14  
15  
16  
17  
18  
19  
20  
21  
22  
23  
24  
25  
26  
27  
28  
29  
30  
31  
32  
33  
34  
35  
36  
37  
38  
39  
40  
41  
42  
43  
44  
45  
46  
47

|  |  |  |  |                                                                                                                                                                                                                                                                                                                                                                                                                                                                                                                                                                                                                                                                                                                                                                                                                             |
|--|--|--|--|-----------------------------------------------------------------------------------------------------------------------------------------------------------------------------------------------------------------------------------------------------------------------------------------------------------------------------------------------------------------------------------------------------------------------------------------------------------------------------------------------------------------------------------------------------------------------------------------------------------------------------------------------------------------------------------------------------------------------------------------------------------------------------------------------------------------------------|
|  |  |  |  | <p>No statistically significant effect of the scheme in the treat2 households (Probability of any OOP OR: 1.093, SE: 0.1737; OOP Share DID -0.004, SE: 0.0033; Probability of Catastrophic OR 1.003, SE 0.1972), except for per person monthly OP OOP spending, which declined by 19% (Difference: -0.151, SE: 0.0735).</p> <p><b>3) Total OOP:</b><br/>Insignificant result in all OOP indicators except 11% (OR: -0.113, SE: 0.0738) decline in OOP level</p> <p><b>4) Nonmedical expenditure of households:</b> No difference.</p> <p><b>5) Drug and non-drug expenditure:</b> mostly small and Insignificant</p> <p><b>Subgroup analysis using only data for treated districts with “high enrolment rates,” defined as enrolment exceeding 50% of eligible families:</b> Did not find evidence of larger effects in</p> |
|--|--|--|--|-----------------------------------------------------------------------------------------------------------------------------------------------------------------------------------------------------------------------------------------------------------------------------------------------------------------------------------------------------------------------------------------------------------------------------------------------------------------------------------------------------------------------------------------------------------------------------------------------------------------------------------------------------------------------------------------------------------------------------------------------------------------------------------------------------------------------------|

|                            |                                                                                                                   |                                                                                                         |                                                                                                                                                                                 |                                                                                                                                                                                                                                                                                                                                                                                                                                                                                                                                                           |
|----------------------------|-------------------------------------------------------------------------------------------------------------------|---------------------------------------------------------------------------------------------------------|---------------------------------------------------------------------------------------------------------------------------------------------------------------------------------|-----------------------------------------------------------------------------------------------------------------------------------------------------------------------------------------------------------------------------------------------------------------------------------------------------------------------------------------------------------------------------------------------------------------------------------------------------------------------------------------------------------------------------------------------------------|
|                            |                                                                                                                   |                                                                                                         |                                                                                                                                                                                 | high-enrolment districts. The direction of change of all the outcome indicators remained largely similar to the findings for the broader set of intervention districts                                                                                                                                                                                                                                                                                                                                                                                    |
| <b>Katyal et al., 2015</b> | A retrospective, longitudinal, controlled quasi-experimental Study (Two large surveys): Difference-in-differences | Pre-post intervention effect: Pre-intervention NSSO 2004 survey and post intervention NSSO 2012 survey. | PFHI covered: RAS and RSBY<br>No. Of HHs:<br><b>Intervention 1:</b> RAS of AP in 2004: 0559 and 2012: 8623.<br><b>Intervention 2:</b> RSBY of MH in 2004: 5314 & in 2012: 10073 | 1) <b>Changes in average IP expenditure—public vs private</b> (the real terms change (deflated to 2004 prices) in these outcomes at follow-up and the DID estimate comparing AP with MH)<br><b>Private:</b> The overall expenditure on IP care per episode in private facilities has increased in both states and the DID is -2076.5 (-3996:-157) p=0.04 INR in AP compared to MH.<br><b>Public:</b> The average expenditure on public facilities has also increased in both states, and DID is -1605.3 (-2628.6:-582.1) p=0.002 INR in AP compared to MH |
| <b>Khetrपाल &amp;</b>      | Cross sectional survey (bivariate analysis and Student's t test)                                                  | Districts of Patiala, Punjab & Yamunanagar, Haryana in 2011-13. Participants                            | PFHI covered: RSBY<br>RSBY had completed at least two years of                                                                                                                  | RSBY beneficiaries had incurred OOP expenditure of mean: ₹5748 (±9211) though it was lesser than for                                                                                                                                                                                                                                                                                                                                                                                                                                                      |

|                                                  |                                                                                                                                                   |                                                                                                                                                                                                                           |                                                                                                                                                                                                                                      |                                                                                                                                                                                                                                                                                                                                                                                                                                                                                                 |
|--------------------------------------------------|---------------------------------------------------------------------------------------------------------------------------------------------------|---------------------------------------------------------------------------------------------------------------------------------------------------------------------------------------------------------------------------|--------------------------------------------------------------------------------------------------------------------------------------------------------------------------------------------------------------------------------------|-------------------------------------------------------------------------------------------------------------------------------------------------------------------------------------------------------------------------------------------------------------------------------------------------------------------------------------------------------------------------------------------------------------------------------------------------------------------------------------------------|
| <p><b>Acharya, 2019</b></p>                      |                                                                                                                                                   | <p>chosen from 12 empaneled hospitals (3 public and 3 private each from both the districts)</p>                                                                                                                           | <p>implementation in these districts at the time of data collection. Participants who were enrolled in RSBY (n=751) and non RSBY (n=364)</p>                                                                                         | <p>non-RSBY (mean: ₹10667 ±16990.9) and less at public facilities when compared to private</p>                                                                                                                                                                                                                                                                                                                                                                                                  |
| <p><b>Mahapatro, Singh &amp; Singh, 2018</b></p> | <p>Analysis of the 71<sup>st</sup> round of cross- sectional household NSS 2014 survey<br/><br/>Bi variate and multivariate analysis was done</p> | <p>-71 st round National Sample Survey, 2014, ‘Social Consumption: Health’ Schedule 25.0<br/><br/>-To examine the impact of health insurance on OOP payment, two-part model was used (part 1 logit and part 2 linear)</p> | <p>PFHI covered: Government funded health insurance schemes like RSBY, Arogyashree, CGHS, ESIS<br/><br/>Information of hospitalization during 365 days was used for the analysis.<br/><br/>For association comparisons were made</p> | <p><b>1) Average OOP Expenditure per hospitalization</b><br/><br/>For government funded health insurance (RSBY, Arogyasri, CGHS, ESIS): Public provider Mean= Rs 3987 (47%); Private provider Mean= Rs 19737 (53%); Total Mean= 12408 (100%)<br/><br/>For other HI: Public provider Mean= 7934 (18%); private provider Mean= 20764 (72%); Total Mean= 18510 (100 %)<br/><br/>Not Health insured: Public provider Mean= 5437 (46%); Private provider Mean= 24341 (54%); Total= 15647 (100 %)</p> |

|                                                  |                                                         |                                                                                                                                            |                                                                                                             |                                                                                                                                                                                                                                                                                                                                                                                                                                                                                                                                       |
|--------------------------------------------------|---------------------------------------------------------|--------------------------------------------------------------------------------------------------------------------------------------------|-------------------------------------------------------------------------------------------------------------|---------------------------------------------------------------------------------------------------------------------------------------------------------------------------------------------------------------------------------------------------------------------------------------------------------------------------------------------------------------------------------------------------------------------------------------------------------------------------------------------------------------------------------------|
|                                                  |                                                         |                                                                                                                                            | <p>between insured and uninsured</p>                                                                        | <p><b>2) Extent of OOP expenditure (Monthly) by insurance status</b></p> <p>For Government health insurance=Rs 1034</p> <p>For Private (other) HI= Rs 1542</p> <p>For non-insured= Rs 1304</p> <p>Therefore, OOP expenditure was lower for government insurance holder than those not having any of government Insurance schemes</p> <p><b>3) Association of OOPE with health insurance</b></p> <p>For PFHI insurance= - 2.47 (p&lt;0.01) (part 1 Logit model)</p> <p>For PFHI insurance= -0.34 (p&lt;0.01) (part 2 Linear model)</p> |
| <p><b>Nandi, Schneider &amp; Dixit, 2017</b></p> | <p>Secondary data, multivariate logistic regression</p> | <p>NSSO, the Chhattisgarh State data used in this study were extracted from the 25th schedule of the 71st round of the cross-sectional</p> | <p>PFHI covered: Government funded health insurance schemes in Chhattisgarh viz. RSBY, MSBY, ESIS, CGHS</p> | <p><b>Out of pocket expenditure:</b></p> <p>-Government insurance coverage (AOR 0.265; 95% CI: 0.174–0.405) and childbirth conditions (AOR 0.516; 95% CI: 0.290–0.918) were significantly less</p>                                                                                                                                                                                                                                                                                                                                    |

1  
2  
3  
4  
5  
6  
7  
8  
9  
10  
11  
12  
13  
14  
15  
16  
17  
18  
19  
20  
21  
22  
23  
24  
25  
26  
27  
28  
29  
30  
31  
32  
33  
34  
35  
36  
37  
38  
39  
40  
41  
42  
43  
44  
45  
46  
47

|                    |                                                             |                                                                                                                                                                                                                                                                                                                                                                  |                              |                                                                                                                                                                                                                                                                                                                                     |
|--------------------|-------------------------------------------------------------|------------------------------------------------------------------------------------------------------------------------------------------------------------------------------------------------------------------------------------------------------------------------------------------------------------------------------------------------------------------|------------------------------|-------------------------------------------------------------------------------------------------------------------------------------------------------------------------------------------------------------------------------------------------------------------------------------------------------------------------------------|
|                    |                                                             | <p>Indian National Sample Survey, conducted between January and June 2014</p> <p>The Chhattisgarh sample included 1205 house- holds and 6026 individuals (household members)</p> <p>Out of pocket expenditure on hospitalization was calculated per episode as medical expenditure minus reimbursements. Weighted medians of OOP expenditure were calculated</p> |                              | <p>likely to entail OOP expenditure than no insurance and other ailments respectively</p> <p>-Women (AOR 1.700; 95% CI: 1.012–2.858) more likely to incur OOP expenditure than men and hospitalization in private hospital had a significantly higher possibility of incurring OOP expenditure than any other type of facility.</p> |
| <b>Philip, Kan</b> | A comparative cross-sectional survey of 149 insured and 147 | Using generalized estimating equations, the correlates of inpatient                                                                                                                                                                                                                                                                                              | PFHI covered: CHIS of Kerala | OOPE: The mean OOP expenses for inpatient services among insured participants (INR 448.95) was                                                                                                                                                                                                                                      |

|                                                                                                                                                                                                                                                     |                                                                                                                                                                                                                                 |                                                                                                                                                                                                                                                                                                                                                                  |                                                                                                                                |                                                                                                                  |
|-----------------------------------------------------------------------------------------------------------------------------------------------------------------------------------------------------------------------------------------------------|---------------------------------------------------------------------------------------------------------------------------------------------------------------------------------------------------------------------------------|------------------------------------------------------------------------------------------------------------------------------------------------------------------------------------------------------------------------------------------------------------------------------------------------------------------------------------------------------------------|--------------------------------------------------------------------------------------------------------------------------------|------------------------------------------------------------------------------------------------------------------|
| <p>1<br/>2<br/>3<br/>4<br/>5<br/>6<br/>7<br/>8<br/>9<br/>10<br/>11<br/>12<br/>13<br/>14<br/>15<br/>16<br/>17<br/>18<br/>19<br/>20<br/>21<br/>22<br/>23<br/>24<br/>25<br/>26<br/>27<br/>28<br/>29<br/>30<br/>31<br/>32</p> <p><b>Sarma, 2016</b></p> | <p>uninsured BPL households was conducted in Trivandrum district of Kerala. Pearson's <math>\chi^2</math> test comparison. Multivariate logistic regression analysis was used to derive the predictors of insurance status.</p> | <p>service utilization of individuals were estimated. The models were built by the method of iterative backward elimination and forward selection because the study did not use any conceptual framework, and it aimed at exploration. The Mann-Whitney <i>U</i> test was used to compare the expenditure associated with inpatient care between the 2 group</p> | <p>A total of 149 insured and 147 uninsured households, with 667 and 578 members, respectively, were included in the study</p> | <p>significantly higher than that of the uninsured households (INR 159.93); <math>p = .003</math> at 95% CI.</p> |
| <p>33<br/>34<br/>35<br/>36<br/>37<br/>38<br/>39<br/>40<br/>41<br/>42<br/>43<br/>44<br/>45<br/>46<br/>47</p> <p><b>Ranjan et al 2018</b></p>                                                                                                         | <p>Analysis of a cross-sectional study</p>                                                                                                                                                                                      | <p>-Data from the 71<sup>st</sup> round of NSSO survey I.e. 'Social Consumption: Health' survey</p>                                                                                                                                                                                                                                                              | <p>PFHI covered: Public Funded Health Insurance (PFHI) schemes e.g. RSBY</p>                                                   | <p><b>1) Average OOPE (the median) with PFHI coverage and no insurance</b><br/>A) Rural</p>                      |



1  
2  
3  
4  
5  
6  
7  
8  
9  
10  
11  
12  
13  
14  
15  
16  
17  
18  
19  
20  
21  
22  
23  
24  
25  
26  
27  
28  
29  
30  
31  
32  
33  
34  
35  
36  
37  
38  
39  
40  
41  
42  
43  
44  
45  
46  
47

|  |  |                                                                                                                         |  |                                                                                                                                                                                                                                                                                                                                                                                                                                                                                                                                                                                                                                                                     |
|--|--|-------------------------------------------------------------------------------------------------------------------------|--|---------------------------------------------------------------------------------------------------------------------------------------------------------------------------------------------------------------------------------------------------------------------------------------------------------------------------------------------------------------------------------------------------------------------------------------------------------------------------------------------------------------------------------------------------------------------------------------------------------------------------------------------------------------------|
|  |  | <p>-Propensity score matching (PSM) for the effectiveness of PFHIs and multiple logistic regression for association</p> |  | <p>People having government insurance: Average OOPE in public= Rs 2848; Average OOPE in private= Rs. 17,493</p> <p>People with no insurance: Average OOPE in public =Rs 3994; Average OOPE in private= Rs 20,445</p> <p>B) Urban</p> <p>People having government insurance: Average OOPE in public= Rs 2738; Average OOPE in private= Rs. 19,111</p> <p>People with no insurance: Average OOPE in public =Rs 6322; Average OOPE in private= Rs 27,102</p> <p><b>2) Impact Assessment of PFHI on CHE at 10% and 25% threshold using Propensity Score Matching (PSM)</b></p> <p>For 10% CHE</p> <p>Public insurance v/s no insurance (unmatched)= -0.05 (SE=0.01)</p> |
|--|--|-------------------------------------------------------------------------------------------------------------------------|--|---------------------------------------------------------------------------------------------------------------------------------------------------------------------------------------------------------------------------------------------------------------------------------------------------------------------------------------------------------------------------------------------------------------------------------------------------------------------------------------------------------------------------------------------------------------------------------------------------------------------------------------------------------------------|

|    |  |  |  |                                                       |
|----|--|--|--|-------------------------------------------------------|
| 1  |  |  |  | Public insurance v/s no insurance (ATT)= -0.13        |
| 2  |  |  |  | (SE=0.02; 95%CI= -0.16, -0.10)                        |
| 3  |  |  |  | For 25%CHE                                            |
| 4  |  |  |  | Public insurance v/s no insurance (unmatched)= -0.02  |
| 5  |  |  |  | (SE=0.01)                                             |
| 6  |  |  |  | Public insurance v/s no insurance (ATT)= -0.06 (SE=   |
| 7  |  |  |  | 0.01; 95%CI= -0.09, - 0.04)                           |
| 8  |  |  |  | <b>3) Impact Assessment of PFHI on CHE at 10% and</b> |
| 9  |  |  |  | <b>25% threshold using Propensity Score Matching</b>  |
| 10 |  |  |  | <b>(PSM) for below three quintiles</b>                |
| 11 |  |  |  | For 10%CHE                                            |
| 12 |  |  |  | Public v/s no insurance (unmatched)= -0.02 (SE=       |
| 13 |  |  |  | 0.009)                                                |
| 14 |  |  |  | Public insurance v/s no insurance (ATT)= -0.004       |
| 15 |  |  |  | (SE=0.03; 95%CI=-0.04 to - 0.001)                     |
| 16 |  |  |  | For 25%CHE                                            |
| 17 |  |  |  | Public v/s no insurance (unmatched)= -0.008(SE=       |
| 18 |  |  |  | 0.007)                                                |
| 19 |  |  |  |                                                       |
| 20 |  |  |  |                                                       |
| 21 |  |  |  |                                                       |
| 22 |  |  |  |                                                       |
| 23 |  |  |  |                                                       |
| 24 |  |  |  |                                                       |
| 25 |  |  |  |                                                       |
| 26 |  |  |  |                                                       |
| 27 |  |  |  |                                                       |
| 28 |  |  |  |                                                       |
| 29 |  |  |  |                                                       |
| 30 |  |  |  |                                                       |
| 31 |  |  |  |                                                       |
| 32 |  |  |  |                                                       |
| 33 |  |  |  |                                                       |
| 34 |  |  |  |                                                       |
| 35 |  |  |  |                                                       |
| 36 |  |  |  |                                                       |
| 37 |  |  |  |                                                       |
| 38 |  |  |  |                                                       |
| 39 |  |  |  |                                                       |
| 40 |  |  |  |                                                       |
| 41 |  |  |  |                                                       |
| 42 |  |  |  |                                                       |
| 43 |  |  |  |                                                       |
| 44 |  |  |  |                                                       |
| 45 |  |  |  |                                                       |
| 46 |  |  |  |                                                       |
| 47 |  |  |  |                                                       |

1  
2  
3  
4  
5  
6  
7  
8  
9  
10  
11  
12  
13  
14  
15  
16  
17  
18  
19  
20  
21  
22  
23  
24  
25  
26  
27  
28  
29  
30  
31  
32  
33  
34  
35  
36  
37  
38  
39  
40  
41  
42  
43  
44  
45  
46  
47

|  |  |  |  |                                                                                                                                                                                                                                                                                                                                                                                                                                                                                                                                                                                                                                                  |
|--|--|--|--|--------------------------------------------------------------------------------------------------------------------------------------------------------------------------------------------------------------------------------------------------------------------------------------------------------------------------------------------------------------------------------------------------------------------------------------------------------------------------------------------------------------------------------------------------------------------------------------------------------------------------------------------------|
|  |  |  |  | <p>Public insurance vs no insurance (ATT)= -0.01(SE= 0.027; 95%CI= -0.022 to 0.005)</p> <p><b>4) Impoverishment effect of OOPE on hospitalization</b></p> <p>For Government funded HI schemes</p> <p>a) Percentage of household below poverty line pre-payment= 21.85</p> <p>B) Percentage of household below poverty line post-payment= 33.51</p> <p>For Employer supported scheme</p> <p>A) Percentage of household below poverty line pre-payment= 11.04</p> <p>B) Percentage of household below poverty line post-payment= 17.33</p> <p>For Arranged by household</p> <p>A) Percentage of household below poverty line pre-payment= 3.53</p> |
|--|--|--|--|--------------------------------------------------------------------------------------------------------------------------------------------------------------------------------------------------------------------------------------------------------------------------------------------------------------------------------------------------------------------------------------------------------------------------------------------------------------------------------------------------------------------------------------------------------------------------------------------------------------------------------------------------|

For peer review only

|    |  |  |  |                                                     |
|----|--|--|--|-----------------------------------------------------|
| 1  |  |  |  |                                                     |
| 2  |  |  |  |                                                     |
| 3  |  |  |  |                                                     |
| 4  |  |  |  | B) Percentage of household below poverty line post- |
| 5  |  |  |  | payment= 10.33                                      |
| 6  |  |  |  |                                                     |
| 7  |  |  |  | Not covered                                         |
| 8  |  |  |  |                                                     |
| 9  |  |  |  | A) Percentage of household below poverty line pre-  |
| 10 |  |  |  | payment= 28.83                                      |
| 11 |  |  |  |                                                     |
| 12 |  |  |  | B) Percentage of household below poverty line post- |
| 13 |  |  |  | payment= 42.01                                      |
| 14 |  |  |  |                                                     |
| 15 |  |  |  | <b>5) Financial protection and PFHI</b>             |
| 16 |  |  |  |                                                     |
| 17 |  |  |  | A) Private provider without any insurance           |
| 18 |  |  |  |                                                     |
| 19 |  |  |  | Mean OOPE per hospitalization= Rs 22,604            |
| 20 |  |  |  |                                                     |
| 21 |  |  |  | Median OOPE per hospitalization= Rs 11,300          |
| 22 |  |  |  |                                                     |
| 23 |  |  |  | Incidence of CHE-10= 62.4                           |
| 24 |  |  |  |                                                     |
| 25 |  |  |  | Incidence of CHE-25 30.0                            |
| 26 |  |  |  |                                                     |
| 27 |  |  |  | Impoverishment= 19.1                                |
| 28 |  |  |  |                                                     |
| 29 |  |  |  | B) Private provider with PFHI                       |
| 30 |  |  |  |                                                     |
| 31 |  |  |  | Mean OOPE per hospitalization= Rs 17,741            |
| 32 |  |  |  |                                                     |
| 33 |  |  |  | Median OOPE per hospitalization= Rs 10,120          |
| 34 |  |  |  |                                                     |
| 35 |  |  |  | Incidence of CHE-10= 60.0                           |
| 36 |  |  |  |                                                     |
| 37 |  |  |  |                                                     |
| 38 |  |  |  |                                                     |
| 39 |  |  |  |                                                     |
| 40 |  |  |  |                                                     |
| 41 |  |  |  |                                                     |
| 42 |  |  |  |                                                     |
| 43 |  |  |  |                                                     |
| 44 |  |  |  |                                                     |
| 45 |  |  |  |                                                     |
| 46 |  |  |  |                                                     |
| 47 |  |  |  |                                                     |

1  
2  
3  
4  
5  
6  
7  
8  
9  
10  
11  
12  
13  
14  
15  
16  
17  
18  
19  
20  
21  
22  
23  
24  
25  
26  
27  
28  
29  
30  
31  
32  
33  
34  
35  
36  
37  
38  
39  
40  
41  
42  
43  
44  
45  
46  
47

|  |  |  |  |                                                                                                                                                                                                                                                                                                                                                                                                                                                                                                                                     |
|--|--|--|--|-------------------------------------------------------------------------------------------------------------------------------------------------------------------------------------------------------------------------------------------------------------------------------------------------------------------------------------------------------------------------------------------------------------------------------------------------------------------------------------------------------------------------------------|
|  |  |  |  | <p>Incidence of CHE-25= 29.2</p> <p>Impoverishment= 18.2</p> <p>C) Public provider without any insurance</p> <p>Mean OOPE per hospitalization= Rs 4919</p> <p>Median OOPE per hospitalization= Rs 1451</p> <p>Incidence of CHE-10= 16.1</p> <p>Incidence of CHE-25= 6.0</p> <p>Impoverishment= 6.8</p> <p>D) Public provider with PFHI</p> <p>Mean OOPE per hospitalization= Rs 3204</p> <p>Median OOPE per hospitalization= Rs 950</p> <p>Incidence of CHE-10= 14.8</p> <p>Incidence of CHE-25= 5.6</p> <p>Impoverishment= 4.6</p> |
|--|--|--|--|-------------------------------------------------------------------------------------------------------------------------------------------------------------------------------------------------------------------------------------------------------------------------------------------------------------------------------------------------------------------------------------------------------------------------------------------------------------------------------------------------------------------------------------|

For peer review only

|                                                                                                                                                                                                                                                                                                                                                                   |                                                                                                              |                                                                                                                                                                                 |                                                                                                                                                                                                                                                                                                                                  |                                                                                                                                                                                                                                                                                                                                                                                                                                                                                                                                                                                                                                                                                         |
|-------------------------------------------------------------------------------------------------------------------------------------------------------------------------------------------------------------------------------------------------------------------------------------------------------------------------------------------------------------------|--------------------------------------------------------------------------------------------------------------|---------------------------------------------------------------------------------------------------------------------------------------------------------------------------------|----------------------------------------------------------------------------------------------------------------------------------------------------------------------------------------------------------------------------------------------------------------------------------------------------------------------------------|-----------------------------------------------------------------------------------------------------------------------------------------------------------------------------------------------------------------------------------------------------------------------------------------------------------------------------------------------------------------------------------------------------------------------------------------------------------------------------------------------------------------------------------------------------------------------------------------------------------------------------------------------------------------------------------------|
| <p>1<br/>2<br/>3<br/>4<br/>5<br/>6<br/>7<br/>8<br/>9<br/>10<br/>11<br/>12<br/>13<br/>14<br/>15<br/>16<br/>17<br/>18<br/>19<br/>20<br/>21<br/>22<br/>23<br/>24<br/>25<br/>26<br/>27<br/>28<br/>29<br/>30<br/>31<br/>32<br/>33<br/>34<br/>35<br/>36<br/>37<br/>38<br/>39<br/>40<br/>41<br/>42<br/>43<br/>44<br/>45<br/>46<br/>47</p> <p><b>Rao et al., 2014</b></p> | <p>A difference-in-differences (DID) study using repeated cross-sectional surveys with parallel control.</p> | <p>NSSO 2004 survey, A total of 5314 and 5059 households from MH and AP were surveyed by the NSSO in 2004 and Survey in 2012 included 10 073 (MH) and 8623 (AP) households.</p> | <p>PFHI covered: Arogyashree Two cross-sectional surveys: as a baseline, the data from the NSSO 2004 survey collected before the Aarogyasri and RSBY schemes were launched; and as postintervention, a survey using the same methodology conducted in 2012. A survey of 18 696 households across 2 states and 1871 locations</p> | <p>1) <b>Inpatient OOPE</b> (In INR) 2012 compared to 2004: 1 year prior to survey after deducting reimbursement from total expenditure, if any. Both the states: unadjusted DID=-498.2, 95% CI -792.9 to -203.5, p=0.0009 and adjusted: -565.8 (862.9 to -268.6) 0.0002</p> <p><b>Subgroup analysis based on HH head characteristics:</b></p> <p>a) Gender<br/>Male: Mean DID: -513.7 (-843.9 to -183.4) p=0.0023, female it was not significant.</p> <p>b) Social group:<br/>SC: Mean DID -708.7 (-1234.3 to -183.2) p=0.0082<br/>All other groups: Mean DID -1110.46 (-1868 to -352.9) p=0.0041<br/>For ST and other excluded groups, it was not significant.</p> <p>c) Location</p> |
|-------------------------------------------------------------------------------------------------------------------------------------------------------------------------------------------------------------------------------------------------------------------------------------------------------------------------------------------------------------------|--------------------------------------------------------------------------------------------------------------|---------------------------------------------------------------------------------------------------------------------------------------------------------------------------------|----------------------------------------------------------------------------------------------------------------------------------------------------------------------------------------------------------------------------------------------------------------------------------------------------------------------------------|-----------------------------------------------------------------------------------------------------------------------------------------------------------------------------------------------------------------------------------------------------------------------------------------------------------------------------------------------------------------------------------------------------------------------------------------------------------------------------------------------------------------------------------------------------------------------------------------------------------------------------------------------------------------------------------------|

1  
2  
3  
4  
5  
6  
7  
8  
9  
10  
11  
12  
13  
14  
15  
16  
17  
18  
19  
20  
21  
22  
23  
24  
25  
26  
27  
28  
29  
30  
31  
32  
33  
34  
35  
36  
37  
38  
39  
40  
41  
42  
43  
44  
45  
46  
47

|  |  |  |  |                                                                                                                                                                                                                                                                                                                                                                                                                                                                                                                                                                                                                                                                                           |
|--|--|--|--|-------------------------------------------------------------------------------------------------------------------------------------------------------------------------------------------------------------------------------------------------------------------------------------------------------------------------------------------------------------------------------------------------------------------------------------------------------------------------------------------------------------------------------------------------------------------------------------------------------------------------------------------------------------------------------------------|
|  |  |  |  | <p>Rural: Mean DID -504 (-801.9 to -206.0) p=0.0009,<br/>for Urban it was not significant</p> <p>d) Quintile</p> <p>Poorest: Mean DID -1001.3 (-1751 to -251.7)<br/>p=0.0089</p> <p>Middle: Mean DID -798.1 (-1362.9 to -233.3) p=<br/>0.0056</p> <p>For second, fourth and fifth quintile it was not<br/>significant.</p> <p>2) <b>Large inpatient OOPE</b> (A HH with OOPE for<br/>inpatient care was equal to or greater than INR 23,000<br/>(USD419)).</p> <p>Adjusted for both states, Mean DID=-1.8, 95% CI -3<br/>to -0.7, p=0.0009</p> <p><b>Subgroup analysis based on HH head<br/>characteristics:</b></p> <p>Quintile: Poorest: Mean DID -0.2 (-3.8 to -0.19)<br/>p=0.0307</p> |
|--|--|--|--|-------------------------------------------------------------------------------------------------------------------------------------------------------------------------------------------------------------------------------------------------------------------------------------------------------------------------------------------------------------------------------------------------------------------------------------------------------------------------------------------------------------------------------------------------------------------------------------------------------------------------------------------------------------------------------------------|

For peer review only

|  |  |  |  |                                                                                                                                                                                                                                                                                                                                                                                                                                                                                                                                                                                                                                                                                                                                                 |
|--|--|--|--|-------------------------------------------------------------------------------------------------------------------------------------------------------------------------------------------------------------------------------------------------------------------------------------------------------------------------------------------------------------------------------------------------------------------------------------------------------------------------------------------------------------------------------------------------------------------------------------------------------------------------------------------------------------------------------------------------------------------------------------------------|
|  |  |  |  | <p>For other quintile variables, gender, social groups, location it was not significant.</p> <p>3) <b>Large borrowing</b> (if the borrowing was equal to or exceeded the BPL threshold set by the Government of AP: INR 70 000 for urban families and 65000 for rural HHs)</p> <p>In both states: Unadjusted Mean DID: -3.7 (-6.4 to -0.908) p=0.0100 and adjusted DID=-4, 95% CI -6.6 to -1.4, p=0.0032</p> <p><b>Subgroup analysis based on HH head characteristics:</b></p> <p>a) Gender</p> <p>Male: Mean DID -3.6 (-6.6 to -0.62) p=0.0187</p> <p>Female: Mean DID -4.7 (-8.3 to -1) p=0.0137</p> <p>b) Social group</p> <p>ST: Mean DID -5.5 (-9.3 to -1.8) p=0.0048</p> <p>All other groups: Mean DID -4.1 (-7.9 to -0.4.0) p=0.0302</p> |
|--|--|--|--|-------------------------------------------------------------------------------------------------------------------------------------------------------------------------------------------------------------------------------------------------------------------------------------------------------------------------------------------------------------------------------------------------------------------------------------------------------------------------------------------------------------------------------------------------------------------------------------------------------------------------------------------------------------------------------------------------------------------------------------------------|



1  
2  
3  
4  
5  
6  
7  
8  
9  
10  
11  
12  
13  
14  
15  
16  
17  
18  
19  
20  
21  
22  
23  
24  
25  
26  
27  
28  
29  
30  
31  
32  
33  
34  
35  
36  
37  
38  
39  
40  
41  
42  
43  
44  
45  
46  
47

|  |  |  |  |                                                                                                                                                                                                                                                                                                           |
|--|--|--|--|-----------------------------------------------------------------------------------------------------------------------------------------------------------------------------------------------------------------------------------------------------------------------------------------------------------|
|  |  |  |  | <p>For SC and Other excluded groups, it was not significant.</p> <p>c) Location</p> <p>Rural: Mean DID -4.7 (-7.3 to -2.1) p=0.0007, for urban it was not significant</p> <p>d) Quintile</p> <p>Poorest: Mean DID -9 (-14 to -4.4) p=0.0002</p> <p>For others quintile groups it was not significant.</p> |
|--|--|--|--|-----------------------------------------------------------------------------------------------------------------------------------------------------------------------------------------------------------------------------------------------------------------------------------------------------------|

For peer review only

|                                                                                                                                                                                                                                                                                                                                                                             |                                             |                                                                                                              |                                                                                                              |                                                                                                                                                                                                                                                                                                                                                                                                                                                                                                                                                                                                                                                                                                                      |
|-----------------------------------------------------------------------------------------------------------------------------------------------------------------------------------------------------------------------------------------------------------------------------------------------------------------------------------------------------------------------------|---------------------------------------------|--------------------------------------------------------------------------------------------------------------|--------------------------------------------------------------------------------------------------------------|----------------------------------------------------------------------------------------------------------------------------------------------------------------------------------------------------------------------------------------------------------------------------------------------------------------------------------------------------------------------------------------------------------------------------------------------------------------------------------------------------------------------------------------------------------------------------------------------------------------------------------------------------------------------------------------------------------------------|
| <p>1<br/>2<br/>3<br/>4<br/>5<br/>6<br/>7<br/>8<br/>9<br/>10<br/>11<br/>12<br/>13<br/>14<br/>15<br/>16<br/>17<br/>18<br/>19<br/>20<br/>21<br/>22<br/>23<br/>24<br/>25<br/>26<br/>27<br/>28<br/>29<br/>30<br/>31<br/>32<br/>33<br/>34<br/>35<br/>36<br/>37<br/>38<br/>39<br/>40<br/>41<br/>42<br/>43<br/>44<br/>45<br/>46<br/>47</p> <p><b>Ravi &amp; Bergkvist, 2014</b></p> | <p>Analysis of a cross sectional survey</p> | <p>NSSO data for consumption expenditure</p> <p>Difference-in-differences method and regression analysis</p> | <p>PFHI covered: Different PFHI schemes</p> <p>Pre and post analysis of the effects of different schemes</p> | <p><b>1) Means of outcome: Impoverishment</b></p> <p><b>For overall sample</b></p> <p>A) Overall impoverishment</p> <p>Treatment: Pre: 0.281 (–0.003); Post: 0.207 (–0.004);<br/>Diff: –0.074 (–0.005)</p> <p>Control: Pre: 0.357(–0.003); Post: 0.276(–0.004);<br/>Diff: –0.081(–0.005)</p> <p>Difference:<br/>Pre: –0.076(–0.004); Post: –0.069(–0.006); Diff:<br/>0.007(–0.007)</p> <p>B) OOP impoverishment</p> <p>Treatment: Pre: 0.321(–0.003); Post: 0.24 (–0.004);<br/>Diff: –0.081 (–0.005)</p> <p>Control: Pre: 0.401 (–0.003); Post: 0.312 (–0.004);<br/>Diff: –0.089 (–0.005)</p> <p>Difference: Pre: –0.08 (–0.004); Post: –0.072 (–0.006); Diff: 0.008 (–0.007)</p> <p><b>For long term sample</b></p> |
|-----------------------------------------------------------------------------------------------------------------------------------------------------------------------------------------------------------------------------------------------------------------------------------------------------------------------------------------------------------------------------|---------------------------------------------|--------------------------------------------------------------------------------------------------------------|--------------------------------------------------------------------------------------------------------------|----------------------------------------------------------------------------------------------------------------------------------------------------------------------------------------------------------------------------------------------------------------------------------------------------------------------------------------------------------------------------------------------------------------------------------------------------------------------------------------------------------------------------------------------------------------------------------------------------------------------------------------------------------------------------------------------------------------------|

1  
2  
3  
4  
5  
6  
7  
8  
9  
10  
11  
12  
13  
14  
15  
16  
17  
18  
19  
20  
21  
22  
23  
24  
25  
26  
27  
28  
29  
30  
31  
32  
33  
34  
35  
36  
37  
38  
39  
40  
41  
42  
43  
44  
45  
46  
47

|  |  |  |  |                                                                                                                                                                                                                                                                                                                                                                                                                                                                                                                                                                                                                                                                                                                                                                |
|--|--|--|--|----------------------------------------------------------------------------------------------------------------------------------------------------------------------------------------------------------------------------------------------------------------------------------------------------------------------------------------------------------------------------------------------------------------------------------------------------------------------------------------------------------------------------------------------------------------------------------------------------------------------------------------------------------------------------------------------------------------------------------------------------------------|
|  |  |  |  | <p>A) Overall impoverishment</p> <p>Treatment: Pre: 0.273 (−0.004); Post: 0.169 (−0.005);<br/>Diff: −0.104 (−0.007)</p> <p>Control: Pre: 0.335 (−0.002); Post: 0.266 (−0.003);<br/>Diff: −0.069 (−0.004)</p> <p>Difference: Pre: −0.062 (−0.005); Post: −0.097 (−0.006); Diff: −0.035 (−0.008)</p> <p>B) OOP impoverishment</p> <p>Treatment: Pre: 0.306 (−0.004); Post: 0.193 (−0.006);<br/>Diff: −0.113 (−0.007)</p> <p>Control: Pre: 0.38 (−0.002); Post: 0.303 (−0.003);<br/>Diff: −0.077 (−0.004)</p> <p>Difference: Pre: −0.074 (−0.005); Post: −0.11 (−0.007); Diff: −0.036 (−0.008)</p> <p><b>2) Means of Outcomes, Catastrophic Headcount</b></p> <p><b>Threshold—40% of Non-food Expenditure</b></p> <p><b>For overall sample:</b></p> <p>A) OOP</p> |
|--|--|--|--|----------------------------------------------------------------------------------------------------------------------------------------------------------------------------------------------------------------------------------------------------------------------------------------------------------------------------------------------------------------------------------------------------------------------------------------------------------------------------------------------------------------------------------------------------------------------------------------------------------------------------------------------------------------------------------------------------------------------------------------------------------------|

|    |  |  |  |                                                     |
|----|--|--|--|-----------------------------------------------------|
| 1  |  |  |  |                                                     |
| 2  |  |  |  |                                                     |
| 3  |  |  |  | Treatment: Pre: 0.0466 (–0.0013); Post: 0.0448 (–   |
| 4  |  |  |  | 0.0018); Diff: –0.0018 (–0.0022)                    |
| 5  |  |  |  | Control: Pre: 0.0453 (–0.0013); Post: 0.036 (–      |
| 6  |  |  |  | 0.0017); Diff: –0.0093 (–0.0021)                    |
| 7  |  |  |  | Difference: Pre: 0.0013 (–0.0018); Post: 0.0088 (–  |
| 8  |  |  |  | 0.0025); Diff: 0.0075 (–0.0031)                     |
| 9  |  |  |  | B) Outpatient                                       |
| 10 |  |  |  | Treatment: Pre: 0.0397 (–0.0012); Post: 0.0309 (–   |
| 11 |  |  |  | 0.0016); Diff: –0.0089 (–0.002)                     |
| 12 |  |  |  | Control: Pre: 0.0439 (–0.0013); Post: 0.0254 (–     |
| 13 |  |  |  | 0.0015); Diff: –0.0185 (–0.002)                     |
| 14 |  |  |  | Difference: Pre: –0.0042 (–0.0018); Post: 0.0054 (– |
| 15 |  |  |  | 0.0022); Diff: 0.0096 (–0.0028)                     |
| 16 |  |  |  | C) Drugs                                            |
| 17 |  |  |  | Treatment: Pre: 0.0179 (–0.0008); Post: 0.0167 (–   |
| 18 |  |  |  | 0.0011); Diff: –0.0012 (–0.0014)                    |
| 19 |  |  |  | Control: Pre: 0.0231 (–0.0009); Post: 0.0151 (–     |
| 20 |  |  |  | 0.0012); Diff: –0.008 (–0.0015)                     |
| 21 |  |  |  |                                                     |
| 22 |  |  |  |                                                     |
| 23 |  |  |  |                                                     |
| 24 |  |  |  |                                                     |
| 25 |  |  |  |                                                     |
| 26 |  |  |  |                                                     |
| 27 |  |  |  |                                                     |
| 28 |  |  |  |                                                     |
| 29 |  |  |  |                                                     |
| 30 |  |  |  |                                                     |
| 31 |  |  |  |                                                     |
| 32 |  |  |  |                                                     |
| 33 |  |  |  |                                                     |
| 34 |  |  |  |                                                     |
| 35 |  |  |  |                                                     |
| 36 |  |  |  |                                                     |
| 37 |  |  |  |                                                     |
| 38 |  |  |  |                                                     |
| 39 |  |  |  |                                                     |
| 40 |  |  |  |                                                     |
| 41 |  |  |  |                                                     |
| 42 |  |  |  |                                                     |
| 43 |  |  |  |                                                     |
| 44 |  |  |  |                                                     |
| 45 |  |  |  |                                                     |
| 46 |  |  |  |                                                     |
| 47 |  |  |  |                                                     |

1  
2  
3  
4  
5  
6  
7  
8  
9  
10  
11  
12  
13  
14  
15  
16  
17  
18  
19  
20  
21  
22  
23  
24  
25  
26  
27  
28  
29  
30  
31  
32  
33  
34  
35  
36  
37  
38  
39  
40  
41  
42  
43  
44  
45  
46  
47

|  |  |  |  |                                                                                                                                                                                                                                                                                                                                                                                                                                                                                                                                                                                                                                                                                                                          |
|--|--|--|--|--------------------------------------------------------------------------------------------------------------------------------------------------------------------------------------------------------------------------------------------------------------------------------------------------------------------------------------------------------------------------------------------------------------------------------------------------------------------------------------------------------------------------------------------------------------------------------------------------------------------------------------------------------------------------------------------------------------------------|
|  |  |  |  | <p>Difference: Pre: -0.0052 (-0.0012); Post: 0.0016 (-0.0016); Diff: 0.0068 (-0.002)</p> <p><b>Long term sample</b></p> <p>A) OOP</p> <p>Treatment: Pre: 0.0389 (-0.0018); Post: 0.0367 (-0.0026); Diff: -0.0022 (-0.0032)</p> <p>Control: Pre: 0.0479 (-0.001); Post: 0.0411 (-0.0014); Diff: -0.0067 (-0.0018)</p> <p>Difference: Pre: -0.009 (-0.0021); Post: -0.0044 (-0.003); Diff: 0.0046 (-0.0037)</p> <p>B) Outpatient</p> <p>Treatment: Pre: 0.0332 (-0.0017); Post: 0.0282 (-0.0025); Diff: -0.005 (-0.003)</p> <p>Control: Pre: 0.0444 (-0.001); Post: 0.0279 (-0.0012); Diff: -0.0165 (-0.0016)</p> <p>Difference: Pre: -0.0112 (-0.002); Post: 0.0003 (-0.0027); Diff: 0.0115 (-0.0034)</p> <p>C) Drugs</p> |
|--|--|--|--|--------------------------------------------------------------------------------------------------------------------------------------------------------------------------------------------------------------------------------------------------------------------------------------------------------------------------------------------------------------------------------------------------------------------------------------------------------------------------------------------------------------------------------------------------------------------------------------------------------------------------------------------------------------------------------------------------------------------------|

For peer review only

|    |  |  |  |                                                        |
|----|--|--|--|--------------------------------------------------------|
| 1  |  |  |  | Treatment: Pre: 0.011 (–0.001); Post: 0.0095 (–        |
| 2  |  |  |  | 0.0013); Diff: –0.0015 (–0.0016)                       |
| 3  |  |  |  | Control: Pre: 0.0234 (–0.0007); Post: 0.0176 (–        |
| 4  |  |  |  | 0.001); Diff: –0.0058 (–0.0012)                        |
| 5  |  |  |  | Difference: Pre: –0.0124 (–0.0012); Post: –0.0082 (–   |
| 6  |  |  |  | 0.0016); Diff: 0.0042 (–0.002)                         |
| 7  |  |  |  | <b>3) Changes in poverty gap index overtime</b>        |
| 8  |  |  |  | <b>For overall sample</b>                              |
| 9  |  |  |  | A) Overall PGI                                         |
| 10 |  |  |  | Treatment: Pre: 0.059 (–0.0009); Post: 0.04 (–0.001);  |
| 11 |  |  |  | Diff: –0.019 (–0.0013)                                 |
| 12 |  |  |  | :Control: Pre: 0.079 (–0.0008); Post: 0.056 (–0.0011); |
| 13 |  |  |  | Diff: –0.023 (–0.0013)                                 |
| 14 |  |  |  | Difference: Pre: –0.02 (–0.001); Post: –0.016 (–       |
| 15 |  |  |  | 0.001); Diff: 0.004 (–0.002)                           |
| 16 |  |  |  | B) OOP PGI                                             |
| 17 |  |  |  | Treatment: Pre: 0.07(–0.0009); Post: 0.048 (–0.001);   |
| 18 |  |  |  | Diff: –0.022 (–0.0014)                                 |
| 19 |  |  |  |                                                        |
| 20 |  |  |  |                                                        |
| 21 |  |  |  |                                                        |
| 22 |  |  |  |                                                        |
| 23 |  |  |  |                                                        |
| 24 |  |  |  |                                                        |
| 25 |  |  |  |                                                        |
| 26 |  |  |  |                                                        |
| 27 |  |  |  |                                                        |
| 28 |  |  |  |                                                        |
| 29 |  |  |  |                                                        |
| 30 |  |  |  |                                                        |
| 31 |  |  |  |                                                        |
| 32 |  |  |  |                                                        |
| 33 |  |  |  |                                                        |
| 34 |  |  |  |                                                        |
| 35 |  |  |  |                                                        |
| 36 |  |  |  |                                                        |
| 37 |  |  |  |                                                        |
| 38 |  |  |  |                                                        |
| 39 |  |  |  |                                                        |
| 40 |  |  |  |                                                        |
| 41 |  |  |  |                                                        |
| 42 |  |  |  |                                                        |
| 43 |  |  |  |                                                        |
| 44 |  |  |  |                                                        |
| 45 |  |  |  |                                                        |
| 46 |  |  |  |                                                        |
| 47 |  |  |  |                                                        |

1  
2  
3  
4  
5  
6  
7  
8  
9  
10  
11  
12  
13  
14  
15  
16  
17  
18  
19  
20  
21  
22  
23  
24  
25  
26  
27  
28  
29  
30  
31  
32  
33  
34  
35  
36  
37  
38  
39  
40  
41  
42  
43  
44  
45  
46  
47

|  |  |  |  |                                                                                                                                                                                                                                                                                                                                                                                                                                                                                                                                                                                                                                                  |
|--|--|--|--|--------------------------------------------------------------------------------------------------------------------------------------------------------------------------------------------------------------------------------------------------------------------------------------------------------------------------------------------------------------------------------------------------------------------------------------------------------------------------------------------------------------------------------------------------------------------------------------------------------------------------------------------------|
|  |  |  |  | Control: Pre: 0.091 (-0.0009); Post: 0.066 (-0.0011);<br>Diff: -0.025 (-0.0014)<br>Difference: Pre: -0.021(-0.001); Post: -0.018 (-0.002); Diff: 0.003 (-0.002)<br>For Long term sample<br>A) Overall PGI<br>Treatment: Pre: 0.058 (-0.0014); Post: 0.032 (-0.0013); Diff: -0.026 (-0.0019)<br>Control: Pre: 0.073 (-0.0007); Post: 0.053 (-0.0008);<br>Diff: -0.02 (-0.0011)<br>Difference: Pre: -0.015(-0.002); Post: -0.021 (-0.002); Diff: -0.006 (-0.002)<br>B) OOP PGI<br>Treatment: Pre: 0.065 (-0.0014); Post: 0.038 (-0.0014); Diff: -0.027 (-0.002)<br>Control: Pre: 0.086 (-0.0007); Post: 0.063 (-0.0009);<br>Diff: -0.023 (-0.0012) |
|--|--|--|--|--------------------------------------------------------------------------------------------------------------------------------------------------------------------------------------------------------------------------------------------------------------------------------------------------------------------------------------------------------------------------------------------------------------------------------------------------------------------------------------------------------------------------------------------------------------------------------------------------------------------------------------------------|

For peer review only

1  
2  
3  
4  
5  
6  
7  
8  
9  
10  
11  
12  
13  
14  
15  
16  
17  
18  
19  
20  
21  
22  
23  
24  
25  
26  
27  
28  
29  
30  
31  
32  
33  
34  
35  
36  
37  
38  
39  
40  
41  
42  
43  
44  
45  
46  
47

|  |  |  |  |                                                                                                                                                                                                                                                                                                                                                                                                                                                                                                                                                                                                                                                                                                                                                                                                                     |
|--|--|--|--|---------------------------------------------------------------------------------------------------------------------------------------------------------------------------------------------------------------------------------------------------------------------------------------------------------------------------------------------------------------------------------------------------------------------------------------------------------------------------------------------------------------------------------------------------------------------------------------------------------------------------------------------------------------------------------------------------------------------------------------------------------------------------------------------------------------------|
|  |  |  |  | <p>Difference: Pre: -0.021(-0.002); Post: -0.025 (-0.002); Diff: -0.004 (-0.002)</p> <p><b>After regression analysis with fixed state effects</b></p> <p><b>Short term impact</b></p> <p><b>1) Impoverishment Effects in Overall Sample</b></p> <p>A) Overall impoverishment: Treatment*Post:<br/>0.0082(-0.0065; p&gt;0.1)</p> <p>B) Impoverishment net of OOP: Treatment*Post:<br/>0.0089(-0.0067; p&gt;0.1)</p> <p>C) Impoverishment net of hospitalization: Treatment<br/>*Post: 0.0063 (-0.0065; p&gt;0.1)</p> <p>D) Impoverishment net of outpatient: Treatment<br/>*Post: 0.0107 (-0.0067; p&gt;0.1)</p> <p>E) Impoverishment net of drugs: Treatment *Post:<br/>0.0094 (-0.0067; p&gt;0.1)</p> <p><b>2) Catastrophic Headcount, Overall sample—</b></p> <p><b>Threshold 40% of Non-food Expenditure</b></p> |
|--|--|--|--|---------------------------------------------------------------------------------------------------------------------------------------------------------------------------------------------------------------------------------------------------------------------------------------------------------------------------------------------------------------------------------------------------------------------------------------------------------------------------------------------------------------------------------------------------------------------------------------------------------------------------------------------------------------------------------------------------------------------------------------------------------------------------------------------------------------------|



1  
2  
3  
4  
5  
6  
7  
8  
9  
10  
11  
12  
13  
14  
15  
16  
17  
18  
19  
20  
21  
22  
23  
24  
25  
26  
27  
28  
29  
30  
31  
32  
33  
34  
35  
36  
37  
38  
39  
40  
41  
42  
43  
44  
45  
46  
47

|  |  |  |  |                                                                                                                                                                                                                                                                                                                                                                                                                                                                                                                                                                                                                                                              |
|--|--|--|--|--------------------------------------------------------------------------------------------------------------------------------------------------------------------------------------------------------------------------------------------------------------------------------------------------------------------------------------------------------------------------------------------------------------------------------------------------------------------------------------------------------------------------------------------------------------------------------------------------------------------------------------------------------------|
|  |  |  |  | <p>A) Due to OOP: Treatment *Post: 0.0075 (–0.003; p&lt;0.05)</p> <p>B) Due to hospitalization: Treatment *Post: 0.0004(–0.0014; p&gt;0.1)</p> <p>C) Due to outpatient: Treatment *Post: 0.0096 (–0.0028; p&lt;0.01)</p> <p>D) Due to drugs: Treatment *Post: 0.0069(–0.002; p&lt;0.01)</p> <p><b>3) Poverty Gap Index, Overall Sample</b></p> <p>A) Poverty gap index: Treatment *Post: 0.0037(–0.0018; p&lt;0.05)</p> <p>B) PGI net of OOP: Treatment *Post: 0.0047(–0.0019; p&lt;0.05)</p> <p>C) PGI net of hospitalization: Treatment *Post: 0.0036(–0.0018; p&lt;0.05)</p> <p>D) PGI net of outpatient: Treatment *Post: 0.0049(–0.0019; p&lt;0.01)</p> |
|--|--|--|--|--------------------------------------------------------------------------------------------------------------------------------------------------------------------------------------------------------------------------------------------------------------------------------------------------------------------------------------------------------------------------------------------------------------------------------------------------------------------------------------------------------------------------------------------------------------------------------------------------------------------------------------------------------------|

For peer review only

|    |  |  |  |                                                     |
|----|--|--|--|-----------------------------------------------------|
| 1  |  |  |  | E) PGI net of drugs: Treatment *Post: 0.0048(–      |
| 2  |  |  |  | 0.0019; p<0.05)                                     |
| 3  |  |  |  | <b>Long term impact of PFHIS</b>                    |
| 4  |  |  |  | <b>1) Impoverishment, Long-term Sample</b>          |
| 5  |  |  |  | A) Overall impoverishment: Treatment *Post: –0.0308 |
| 6  |  |  |  | (–0.0077; p<0.01)                                   |
| 7  |  |  |  | B) Impoverishment net of OOP: Treatment *Post: –    |
| 8  |  |  |  | 0.0316(–0.008; p<0.01)                              |
| 9  |  |  |  | C) Impoverishment net of hospitalization: Treatment |
| 10 |  |  |  | *Post: –0.0313(–0.0077; p<0.01)                     |
| 11 |  |  |  | D) Impoverishment net of outpatient: Treatment      |
| 12 |  |  |  | *Post: –0.0293(–0.0079; p<0.01)                     |
| 13 |  |  |  | E) Impoverishment net of drugs: Treatment *Post: –  |
| 14 |  |  |  | 0.0275(–0.0079; p<0.01)                             |
| 15 |  |  |  | <b>2) Catastrophic Headcount, Long-term Sample—</b> |
| 16 |  |  |  | <b>Threshold 40% of Non-food Expenditure</b>        |
| 17 |  |  |  | A) Due to OOP: Treatment *Post: 0.0048(–0.0036;     |
| 18 |  |  |  | p>0.1)                                              |

1  
2  
3  
4  
5  
6  
7  
8  
9  
10  
11  
12  
13  
14  
15  
16  
17  
18  
19  
20  
21  
22  
23  
24  
25  
26  
27  
28  
29  
30  
31  
32  
33  
34  
35  
36  
37  
38  
39  
40  
41  
42  
43  
44  
45  
46  
47

|  |  |  |  |                                                                                                                                                                                                                                                                                                                                                                                                                                                                                                                                                                                                                                                                        |
|--|--|--|--|------------------------------------------------------------------------------------------------------------------------------------------------------------------------------------------------------------------------------------------------------------------------------------------------------------------------------------------------------------------------------------------------------------------------------------------------------------------------------------------------------------------------------------------------------------------------------------------------------------------------------------------------------------------------|
|  |  |  |  | <p>B) Due to hospitalization: Treatment *Post: -0.0006(-0.0017; p&gt;0.1)</p> <p>C) Due to outpatient: Treatment *Post: 0.0120(-0.0033; p&lt;0.01)</p> <p>D) Due to drugs: Treatment *Post: 0.0045(-0.002; p&lt;0.05)</p> <p><b>3) Poverty Gap Index, Long-term Sample</b></p> <p>A) Poverty gap index: Treatment *Post: -0.0047(-0.0021; p&lt;0.05)</p> <p>B) PGI net of OOP: Treatment *Post: -0.0035(-0.0022; p&gt;0.1)</p> <p>C) PGI net of hospitalization: Treatment *Post: -0.0047(-0.0021; p&lt;0.05)</p> <p>D) PGI net of outpatient: Treatment *Post: -0.0035(-0.0022; p&gt;0.1)</p> <p>E) PGI net of drugs: Treatment *Post: -0.0032(-0.0022; p&gt;0.1)</p> |
|--|--|--|--|------------------------------------------------------------------------------------------------------------------------------------------------------------------------------------------------------------------------------------------------------------------------------------------------------------------------------------------------------------------------------------------------------------------------------------------------------------------------------------------------------------------------------------------------------------------------------------------------------------------------------------------------------------------------|

For peer review only

|                                                   |                                                                                                                 |                                                                                                                                                                                                                                             |                                      |                                                                                                                                                                                                                                                                                                                                                                                                                                                                                                                                                                                                                                                                                                                                                                                                                                                                                                                                             |
|---------------------------------------------------|-----------------------------------------------------------------------------------------------------------------|---------------------------------------------------------------------------------------------------------------------------------------------------------------------------------------------------------------------------------------------|--------------------------------------|---------------------------------------------------------------------------------------------------------------------------------------------------------------------------------------------------------------------------------------------------------------------------------------------------------------------------------------------------------------------------------------------------------------------------------------------------------------------------------------------------------------------------------------------------------------------------------------------------------------------------------------------------------------------------------------------------------------------------------------------------------------------------------------------------------------------------------------------------------------------------------------------------------------------------------------------|
| <p><b>Raza, van de Poel &amp; Panda, 2016</b></p> | <p>Two cross sectional surveys among SHG members themselves or the head of the (households) HHs: Regression</p> | <p>Primary study: Baseline survey: March and May 2010 (3,686 HHs) and follow-up survey: March and April in 2012 (3,318 HHs) and 2013 (3307 HHs). Location: Kanpur Dehat and Pratapgarh districts in Uttar Pradesh and Vaishali in Bihar</p> | <p>PFHI covered: RSBY membership</p> | <p><b>1)) OOP Spending (Log of healthcare expenses conditional on spending (INR):</b> RSBY membership to be associated with a reduction in OOP spending in Bihar (36%) [-0.361* (0.190), n=577]. Pooled: -0.056 (0.170), n=1361 and UP: 0.224 (0.296), n=804 are not significant.</p> <p><b>Sensitivity analysis</b> by restricting the sample to HHs in the bottom two asset tertiles: Bihar it is significant - 0.675 (0.234), n=403, while pooled and UP it is not.</p> <p><b>2) Log of the amount of debt conditional on borrowing (INR):</b> RSBY HHs in Bihar concurrently experience a 55% [-0.547 (0.232), n=457] reduction in the amount of debt incurred in dealing with the cost of hospitalization.</p> <p>Pooled: -0.078 (0.206), n=1100 and UP: 0.251 (0.353), n=643 are not significant.</p> <p><b>Sensitivity analysis</b> by restricting the sample to HHs in the bottom two asset tertiles: Bihar it is significant -</p> |
|---------------------------------------------------|-----------------------------------------------------------------------------------------------------------------|---------------------------------------------------------------------------------------------------------------------------------------------------------------------------------------------------------------------------------------------|--------------------------------------|---------------------------------------------------------------------------------------------------------------------------------------------------------------------------------------------------------------------------------------------------------------------------------------------------------------------------------------------------------------------------------------------------------------------------------------------------------------------------------------------------------------------------------------------------------------------------------------------------------------------------------------------------------------------------------------------------------------------------------------------------------------------------------------------------------------------------------------------------------------------------------------------------------------------------------------------|

1  
2  
3  
4  
5  
6  
7  
8  
9  
10  
11  
12  
13  
14  
15  
16  
17  
18  
19  
20  
21  
22  
23  
24  
25  
26  
27  
28  
29  
30  
31  
32  
33  
34  
35  
36  
37  
38  
39  
40  
41  
42  
43  
44  
45  
46  
47

|                               |                                               |                                                                                                                                                                                                                                                                                            |                                                                                                                                                                                                                                                                                              |                                                                                                                                                                                                                                                                                                                                                                                                                                                                                       |
|-------------------------------|-----------------------------------------------|--------------------------------------------------------------------------------------------------------------------------------------------------------------------------------------------------------------------------------------------------------------------------------------------|----------------------------------------------------------------------------------------------------------------------------------------------------------------------------------------------------------------------------------------------------------------------------------------------|---------------------------------------------------------------------------------------------------------------------------------------------------------------------------------------------------------------------------------------------------------------------------------------------------------------------------------------------------------------------------------------------------------------------------------------------------------------------------------------|
|                               |                                               |                                                                                                                                                                                                                                                                                            |                                                                                                                                                                                                                                                                                              | 0.611 (0.277), n=355, however not for pooled and UP.<br><br>3) <b>Probability of having healthcare expenses conditional on use:</b> not significant irrespective of sensitivity analysis<br><br>4) <b>Probability of debt conditional on use were not significant:</b> not significant sensitivity analysis                                                                                                                                                                           |
| <b>Sabharwal et al., 2014</b> | Quasi experimental mixed methods study design | Two districts were selected for this study: Moradabad district in Uttar Pradesh and Aurangabad district in Maharashtra.<br><br>At the block level (district sub-division), sites were selected where blocks had proportions of SC and Muslim population equal to the district average, and | PFHI covered: RSBY<br><ul style="list-style-type: none"> <li>• Target group: SC, Muslim and upper caste poor households who are beneficiaries of RSBY (whether they have used the smart card or not)</li> <li>• Control group: SC, Muslim and upper caste poor households who are</li> </ul> | Expenditure as inpatient in Treated INR (US\$) 6366.7/ (US\$ 1012) and in controls INR 8444.6/ (US\$ 135) and average treatment effect (ATT) -2077.8 (US\$ -33) and T Stat, -0.87 amongst the total observations of 451- Radius matching<br><br>Expenditure as inpatient in Treated 6350.4 (/US\$10 2) and in controls 9970.0 (US\$ 160) and average treatment effect of - 3619.6*** (US\$ -58) and T stat, -2.44 amongst the total observations of 91- nearest neighborhood matching |

|  |  |                                                                                                                                                                                                                                                                                                                                                                                                                                                                |                                                    |                                                                                                                                                                                                                                                                                                                                                                                                                                                                                                                                                                                                                                                                                                                                                                                                                                  |
|--|--|----------------------------------------------------------------------------------------------------------------------------------------------------------------------------------------------------------------------------------------------------------------------------------------------------------------------------------------------------------------------------------------------------------------------------------------------------------------|----------------------------------------------------|----------------------------------------------------------------------------------------------------------------------------------------------------------------------------------------------------------------------------------------------------------------------------------------------------------------------------------------------------------------------------------------------------------------------------------------------------------------------------------------------------------------------------------------------------------------------------------------------------------------------------------------------------------------------------------------------------------------------------------------------------------------------------------------------------------------------------------|
|  |  | <p>villages were selected with mixed social group populations. Altogether, the study was conducted in 30 villages (14 villages in Moradabad and 16 villages in Aurangabad). The households were randomly selected from each village based on RSBY beneficiary lists and BPL lists. The households in each location were stratified into beneficiary ('treatment') households and non-beneficiary or ('control') households. We included a control group in</p> | <p>eligible for RSBY but who are not enrolled.</p> | <p>Average expenditure as outpatient in INR (US\$) of total observations 882, Expenditure as inpatient in Treated 701 (US\$ 11) in controls 710 (US\$ 11) and ATT -9.3 and a T stat -0.13- Radius matching</p> <p>Average expenditure as outpatient in INR (US\$) of total observations 385 observations, Expenditure as inpatient in Treated 695 (US\$ 11) in controls 710 (US\$ 11) and ATT of 14 with a T stat of 0.29- nearest neighborhood matching</p> <p>Monthly per capita expenditure accounts to 74.0 (US\$ 1) in treated and 66.2 (US\$ 1) in controls and ATT of 7.7 (US\$ 0.12) with a T stat of 0.52- Radius matching</p> <p>Monthly per capita expenditure accounts to 73.1 (US\$ 1) in treated and 63.4 (US\$ 1) in controls and ATT of 9.7 (US\$ 0.16) with a T stat of 0.95- nearest neighborhood matching</p> |
|--|--|----------------------------------------------------------------------------------------------------------------------------------------------------------------------------------------------------------------------------------------------------------------------------------------------------------------------------------------------------------------------------------------------------------------------------------------------------------------|----------------------------------------------------|----------------------------------------------------------------------------------------------------------------------------------------------------------------------------------------------------------------------------------------------------------------------------------------------------------------------------------------------------------------------------------------------------------------------------------------------------------------------------------------------------------------------------------------------------------------------------------------------------------------------------------------------------------------------------------------------------------------------------------------------------------------------------------------------------------------------------------|

|                                          |                                                                                                                                  |                                                                                                                   |                                                                                                                                                                                                                                      |                                                                                                                                                                                                                                                                                                                                                                                                                                                                                                                |
|------------------------------------------|----------------------------------------------------------------------------------------------------------------------------------|-------------------------------------------------------------------------------------------------------------------|--------------------------------------------------------------------------------------------------------------------------------------------------------------------------------------------------------------------------------------|----------------------------------------------------------------------------------------------------------------------------------------------------------------------------------------------------------------------------------------------------------------------------------------------------------------------------------------------------------------------------------------------------------------------------------------------------------------------------------------------------------------|
|                                          |                                                                                                                                  | <p>order to allow measurement of impact, given that this survey does not have a baseline.</p>                     |                                                                                                                                                                                                                                      |                                                                                                                                                                                                                                                                                                                                                                                                                                                                                                                |
| <p><b>Selvaraj &amp; Karan, 2012</b></p> | <p>Two cross sectional surveys (Authors considered as case control approach and Pre-post approach): difference in difference</p> | <p>Secondary data based on two rounds of NSSO data 2003-04 Pre-intervention and 2009-10 as post intervention.</p> | <p>PFHI covered: RSBY and state insurances implemented in 2007-09. <b>RSBY:</b> 247 districts; <b>State insurance:</b> 74 districts (Andhra Pradesh n=23, Karnataka n=22 and Tamil Nadu n=29); and <b>control:</b> 291 districts</p> | <p><b>Changes in average real per capita OOP expenditure of HHs in pre- (2004-05) and post-insurance (2009-10) years</b></p> <p><b>A) Case control findings:</b></p> <p><b>1) 2004-05 (pre-insurance period) (Rs)</b></p> <p><i>a. Non-intervention districts (NID)= OOP total expenditure: 34.01, IP expenditure: 8.05, OP expenditure: 25.96, Medicine expenditure: 24.53</i></p> <p><i>b. Intervention districts (ID)= Expenditure in terms of OOP: 45.56, IP: 12.70, OP: 32.86 and Medicine: 32.27</i></p> |

|  |  |  |  |                                                                                                                                                                                                                                                                                                                                                                                                                                                                                                                                                                                                                                                                                                                                                                                       |
|--|--|--|--|---------------------------------------------------------------------------------------------------------------------------------------------------------------------------------------------------------------------------------------------------------------------------------------------------------------------------------------------------------------------------------------------------------------------------------------------------------------------------------------------------------------------------------------------------------------------------------------------------------------------------------------------------------------------------------------------------------------------------------------------------------------------------------------|
|  |  |  |  | <p><i>c. Difference between ID and NID= Total: 11.55, IP: 4.65, OP: 6.90, Medicine: 7.74.</i></p> <p><b>2) 2009-10 (post-insurance period) (Rs)</b></p> <p><i>a. NID= Expenditure in terms of OOP: 39.70, IP: 13.48, OP: 26.22 &amp; Medicine: 26.90</i></p> <p><i>b. ID= Expenditure in terms of OOP: 48.97, IP: 15.81, OP: 33.16 and Medicine: 33.56.</i></p> <p><i>c. Difference between ID and NID=Total: 9.27, IP: 2.33, OP: 6.94, Medicine: 6.63.</i></p> <p><b>B) Difference between pre- and post-insurance period (Rs)</b></p> <p><i>a. NID=Total: 5.69, IP: 5.43, OP: 0.26, Medicine: 2.37.</i></p> <p><i>b. ID=Total: 3.41, IP: 3.11, OP: 0.30, Medicine: 1.26.</i></p> <p><i>c. Difference between ID and NID= Total: -2.28, IP: -2.32, OP: 0.04, Medicine: -1.11</i></p> |
|--|--|--|--|---------------------------------------------------------------------------------------------------------------------------------------------------------------------------------------------------------------------------------------------------------------------------------------------------------------------------------------------------------------------------------------------------------------------------------------------------------------------------------------------------------------------------------------------------------------------------------------------------------------------------------------------------------------------------------------------------------------------------------------------------------------------------------------|



1  
2  
3  
4  
5  
6  
7  
8  
9  
10  
11  
12  
13  
14  
15  
16  
17  
18  
19  
20  
21  
22  
23  
24  
25  
26  
27  
28  
29  
30  
31  
32  
33  
34  
35  
36  
37  
38  
39  
40  
41  
42  
43  
44  
45  
46  
47

|  |  |  |  |                                                                                                                                                                                                                                                                                                                                                                                                                                                                                                                                                                                                                                                                                                                                                                                                            |
|--|--|--|--|------------------------------------------------------------------------------------------------------------------------------------------------------------------------------------------------------------------------------------------------------------------------------------------------------------------------------------------------------------------------------------------------------------------------------------------------------------------------------------------------------------------------------------------------------------------------------------------------------------------------------------------------------------------------------------------------------------------------------------------------------------------------------------------------------------|
|  |  |  |  | <p><b>Percentage Share of OOP Expenditure in Overall Household Expenditure</b></p> <p><b>A) Case control findings:</b></p> <p><b>1) 2004-05 (pre-insurance period)</b></p> <p><i>a. Non-intervention districts (NID)= OOP total expenditure: 4.88, IP expenditure: 1.16, OP expenditure: 3.73, Medicine expenditure: 3.52</i></p> <p><i>b. Intervention districts (ID)= Expenditure in terms of OOP: 6.33, IP: 1.76, OP: 4.57 and Medicine: 4.48</i></p> <p><i>c. Difference between ID and NID= Total: 1.45, IP: 0.61, OP: 0.84, Medicine: 0.96.</i></p> <p><b>2) 2009-10 (post-insurance period)</b></p> <p><i>a. NID= Expenditure in terms of OOP: 5.21, IP: 1.77, OP: 3.44 &amp; Medicine: 3.53</i></p> <p><i>b. ID= Expenditure in terms of OOP: 5.96, IP: 1.92, OP: 4.04 and Medicine: 4.08.</i></p> |
|--|--|--|--|------------------------------------------------------------------------------------------------------------------------------------------------------------------------------------------------------------------------------------------------------------------------------------------------------------------------------------------------------------------------------------------------------------------------------------------------------------------------------------------------------------------------------------------------------------------------------------------------------------------------------------------------------------------------------------------------------------------------------------------------------------------------------------------------------------|

For peer review only

|    |  |  |  |                                                              |
|----|--|--|--|--------------------------------------------------------------|
| 1  |  |  |  |                                                              |
| 2  |  |  |  |                                                              |
| 3  |  |  |  |                                                              |
| 4  |  |  |  |                                                              |
| 5  |  |  |  | <i>c. Difference between ID and NID=</i> Total: 0.75, IP:    |
| 6  |  |  |  | 0.16, OP: 0.60, Medicine: 0.55.                              |
| 7  |  |  |  |                                                              |
| 8  |  |  |  |                                                              |
| 9  |  |  |  |                                                              |
| 10 |  |  |  | <b>B) Difference between pre- and post-insurance</b>         |
| 11 |  |  |  | <b>period</b>                                                |
| 12 |  |  |  |                                                              |
| 13 |  |  |  | <i>a. NID=</i> Total: 0.33, IP: 0.61, OP: -0.29, Medicine:   |
| 14 |  |  |  | 0.01.                                                        |
| 15 |  |  |  |                                                              |
| 16 |  |  |  | <i>b. ID=</i> Total: -0.37, IP: 0.16, OP: -0.53, Medicine: - |
| 17 |  |  |  | 0.40.                                                        |
| 18 |  |  |  |                                                              |
| 19 |  |  |  | <i>c. Difference between ID and NID=</i> Total: -0.70, IP: - |
| 20 |  |  |  | 0.45, OP: -0.24, Medicine: -0.41                             |
| 21 |  |  |  |                                                              |
| 22 |  |  |  |                                                              |
| 23 |  |  |  |                                                              |
| 24 |  |  |  | <b>Catastrophic Headcount of OOP Expenditure (%</b>          |
| 25 |  |  |  | <b>of HHs)</b>                                               |
| 26 |  |  |  |                                                              |
| 27 |  |  |  |                                                              |
| 28 |  |  |  |                                                              |
| 29 |  |  |  | <b>A) Case control findings:</b>                             |
| 30 |  |  |  |                                                              |
| 31 |  |  |  |                                                              |
| 32 |  |  |  |                                                              |
| 33 |  |  |  |                                                              |
| 34 |  |  |  |                                                              |
| 35 |  |  |  | <b>1) 2004-05 (pre-insurance period)</b>                     |
| 36 |  |  |  |                                                              |
| 37 |  |  |  |                                                              |
| 38 |  |  |  |                                                              |
| 39 |  |  |  |                                                              |
| 40 |  |  |  |                                                              |
| 41 |  |  |  |                                                              |
| 42 |  |  |  |                                                              |
| 43 |  |  |  |                                                              |
| 44 |  |  |  |                                                              |
| 45 |  |  |  |                                                              |
| 46 |  |  |  |                                                              |
| 47 |  |  |  |                                                              |

1  
2  
3  
4  
5  
6  
7  
8  
9  
10  
11  
12  
13  
14  
15  
16  
17  
18  
19  
20  
21  
22  
23  
24  
25  
26  
27  
28  
29  
30  
31  
32  
33  
34  
35  
36  
37  
38  
39  
40  
41  
42  
43  
44  
45  
46  
47

|  |  |  |  |                                                                                                                                                                                                                                                                                                                                                                                                                                                                                                                                                                                                                                                                                                                                                                                                                                                                                       |
|--|--|--|--|---------------------------------------------------------------------------------------------------------------------------------------------------------------------------------------------------------------------------------------------------------------------------------------------------------------------------------------------------------------------------------------------------------------------------------------------------------------------------------------------------------------------------------------------------------------------------------------------------------------------------------------------------------------------------------------------------------------------------------------------------------------------------------------------------------------------------------------------------------------------------------------|
|  |  |  |  | <p><i>a. Non-intervention districts (NID)= OOP total expenditure: 11.65, IP expenditure: 2.37, OP expenditure: 9.71, Medicine expenditure: 8.45</i></p> <p><i>b. Intervention districts (ID)= Expenditure in terms of OOP: 15.89, IP: 3.53, OP: 13.23 and Medicine: 11.06.</i></p> <p><i>c. Difference between ID and NID= Total: 4.24, IP: 1.16, OP: 3.52, Medicine: 2.61.</i></p> <p><b>2) 2009-10 (post-insurance period)</b></p> <p><i>a. NID= Expenditure in terms of OOP: 11.01, IP: 2.76, OP: 7.99 &amp; Medicine: 6.75</i></p> <p><i>b. ID= Expenditure in terms of OOP: 14.90, IP: 4.06, OP: 10.84 and Medicine: 09.26.</i></p> <p><i>c. Difference between ID and NID= Total: 3.90, IP: 1.30, OP: 2.86, Medicine: 2.51.</i></p> <p><b>B) Difference between pre- and post-insurance period</b></p> <p><i>a. NID= Total: -0.65, IP: 0.39, OP: -1.72 Medicine: -1.70.</i></p> |
|--|--|--|--|---------------------------------------------------------------------------------------------------------------------------------------------------------------------------------------------------------------------------------------------------------------------------------------------------------------------------------------------------------------------------------------------------------------------------------------------------------------------------------------------------------------------------------------------------------------------------------------------------------------------------------------------------------------------------------------------------------------------------------------------------------------------------------------------------------------------------------------------------------------------------------------|

For peer review only

|  |  |  |  |                                                                                                                                                                                                                                                                                                                                                                                                                                                                                                                                                                                                                                                                                                                                                                                                                                                                                                                                          |
|--|--|--|--|------------------------------------------------------------------------------------------------------------------------------------------------------------------------------------------------------------------------------------------------------------------------------------------------------------------------------------------------------------------------------------------------------------------------------------------------------------------------------------------------------------------------------------------------------------------------------------------------------------------------------------------------------------------------------------------------------------------------------------------------------------------------------------------------------------------------------------------------------------------------------------------------------------------------------------------|
|  |  |  |  | <p><i>b. ID= Total: -0.99, IP: 0.53, OP: -2.38, Medicine: -1.81.</i></p> <p><i>c. Difference between ID and NID= Total: -0.34, IP: 0.14, OP: -0.66, Medicine: -0.10</i></p> <p><b>Catastrophic Headcount (%) due to of Hospitalization Expenditure</b></p> <p><b>1) Pre-insurance years (2004-05)</b></p> <p><i>a. Poorest: NID= 0.88, ID= 0.72, difference (Diff)= -0.16</i></p> <p><i>b. Second poorest: NID= 1.42, ID= 1.96, Diff= 0.53</i></p> <p><i>c. Middle: NID=2.14, ID= 2.61, Diff= 0.47</i></p> <p><i>d. Second richest: NID= 2.74, ID= 3.87, Diff= 1.13</i></p> <p><i>e. Richest: NID=5.15, ID= 8.14, Diff= 2.99</i></p> <p><b>2) Post-insurance years (2009-10)</b></p> <p><i>a. Poorest: NID= 0.87, ID= 1.20, Diff= 0.33</i></p> <p><i>b. Second poorest: NID= 1.20, ID= 2.36, Diff= 1.16</i></p> <p><i>c. Middle: NID=2.20, ID= 3.03, Diff= 0.83</i></p> <p><i>d. Second richest: NID= 3.54, ID= 4.93, Diff= 1.39</i></p> |
|--|--|--|--|------------------------------------------------------------------------------------------------------------------------------------------------------------------------------------------------------------------------------------------------------------------------------------------------------------------------------------------------------------------------------------------------------------------------------------------------------------------------------------------------------------------------------------------------------------------------------------------------------------------------------------------------------------------------------------------------------------------------------------------------------------------------------------------------------------------------------------------------------------------------------------------------------------------------------------------|

1  
2  
3  
4  
5  
6  
7  
8  
9  
10  
11  
12  
13  
14  
15  
16  
17  
18  
19  
20  
21  
22  
23  
24  
25  
26  
27  
28  
29  
30  
31  
32  
33  
34  
35  
36  
37  
38  
39  
40  
41  
42  
43  
44  
45  
46  
47

|                    |                                            |                                                                                                                                                                                                          |                                                                                                                                                                                                                |                                                                                                                                                                                                                                                                                                                                                                                                                                              |
|--------------------|--------------------------------------------|----------------------------------------------------------------------------------------------------------------------------------------------------------------------------------------------------------|----------------------------------------------------------------------------------------------------------------------------------------------------------------------------------------------------------------|----------------------------------------------------------------------------------------------------------------------------------------------------------------------------------------------------------------------------------------------------------------------------------------------------------------------------------------------------------------------------------------------------------------------------------------------|
|                    |                                            |                                                                                                                                                                                                          |                                                                                                                                                                                                                | <p><i>e. Richest: NID=7.05, ID= 8.27, Diff= 1.22.</i></p> <p><b>3) Difference between pre- and post-insurance years</b></p> <p><i>a. Poorest: NID= -0.01, ID= 0.48, Diff= 0.50</i></p> <p><i>b. Second poorest: NID= -0.22, ID= 0.40, Diff= 0.62</i></p> <p><i>c. Middle: NID=0.06, ID= 0.42, Diff= 0.36</i></p> <p><i>d. Second richest: NID= 0.80, ID= 1.06, Diff= 0.26</i></p> <p><i>e. Richest: NID=1.90, ID= 0.13, Diff= -1.77.</i></p> |
| <b>Sinha, 2018</b> | A matched controlled cross-sectional study | In order to see whether different characteristics of enrolled and non-enrolled households were matching, z-test was performed comparing the proportion of the characteristics of two sets of households. | PFHI covered: RSBY a sample size of 425 households was estimated with 80 per cent power to detect the change in CHE between insured and non-insured households' arm for each block<br><br>Duration of 3 months | <p>1.The determinant of incidence of Catastrophic Health Expenditure (CHE) Among the Studied Households, households enrolled in RSBY co-efficient-0.077, SE 0.181 and odds ratio of 0.925</p> <p>2. The Determinant of Incidence of Health Expenditure-Induced Poverty Among the Studied Households Which Are at Risk of Becoming Poor, households enrolled in RSBY co-efficient-0.422, SE 0.195, Odds ratio of 1.524</p>                    |

|                         |                                                                              |                                                                                                                                   |                                                                                                                                                                                                                                                                                           |                                                                                                                                                                                       |
|-------------------------|------------------------------------------------------------------------------|-----------------------------------------------------------------------------------------------------------------------------------|-------------------------------------------------------------------------------------------------------------------------------------------------------------------------------------------------------------------------------------------------------------------------------------------|---------------------------------------------------------------------------------------------------------------------------------------------------------------------------------------|
|                         |                                                                              | two purposively selected administrative blocks, namely Silli and Bundu of Ranchi district in Jharkhand between April to June 2014 |                                                                                                                                                                                                                                                                                           | 3. The Determinants of Hospitalization Among the Studied Households; households enrolled in RSBY, co-efficient 0.884, SE 0.571, Odds ratio of 2.421                                   |
| <b>Sood et al, 2014</b> | Quasi experimental design<br><br>Multi variate models were used for analysis | All households in sampled villages were asked to participate in a door to door survey, and 81% of them completed the survey.      | PFHI covered: VAS 31 476 households (22 796 below poverty line and 8680 above poverty line) in 300 villages where the scheme was implemented and 28 633 households (21 767 below poverty line and 6866 above poverty line) in 272 neighboring matched villages ineligible for the scheme. | Eligible households had significantly reduced OOPE for admissions to hospitals with tertiary care facilities likely to be covered by the scheme (64% reduction, 35% to 97%; P<0.001). |

1  
2  
3  
4  
5  
6  
7  
8  
9  
10  
11  
12  
13  
14  
15  
16  
17  
18  
19  
20  
21  
22  
23  
24  
25  
26  
27  
28  
29  
30  
31  
32  
33  
34  
35  
36  
37  
38  
39  
40  
41  
42  
43  
44  
45  
46  
47

|                                       |                                                                                                            |                                                   |                                                                                                                                                                                                                     |                                                                                                                                                                                                                                                                                                                                                              |
|---------------------------------------|------------------------------------------------------------------------------------------------------------|---------------------------------------------------|---------------------------------------------------------------------------------------------------------------------------------------------------------------------------------------------------------------------|--------------------------------------------------------------------------------------------------------------------------------------------------------------------------------------------------------------------------------------------------------------------------------------------------------------------------------------------------------------|
|                                       |                                                                                                            |                                                   | <p>A government insurance program (Vajpayee Arogyashree scheme) that provided free tertiary care to households below the poverty line in about half of villages in Karnataka from February 2010 to August 2012.</p> |                                                                                                                                                                                                                                                                                                                                                              |
| <p><b>Sriram &amp; Khan, 2020</b></p> | <p>Survey among poor individuals: Propensity score matching, logistic regression and Tobit regression.</p> | <p>NSSO survey 2014. N=64270 poor individuals</p> | <p>PFHI covered: any PFHI scheme PFHI (n= 5917) were matched with control group (n=5917). Average Treatment on Treated (ATT) Propensity Score Testing of Two</p>                                                    | <p><b>Effect of PFHI on inpatient out-of-pocket health expenditures (Tobit regression coefficient and 95% CI)</b></p> <p>Enrolment did not have any effect on inpatient OOP health expenditures [-950.36 (- 2501.5 – 600.8)].</p> <p>-Duration of stay in hospital [521.40 (435.3–607.5)],</p> <p>-Graduate level education [7634.86 (2798.5–12,471.3)],</p> |

1  
2  
3  
4  
5  
6  
7  
8  
9  
10  
11  
12  
13  
14  
15  
16  
17  
18  
19  
20  
21  
22  
23  
24  
25  
26  
27  
28  
29  
30  
31  
32  
33  
34  
35  
36  
37  
38  
39  
40  
41  
42  
43  
44  
45  
46  
47

|  |  |  |                                                                                                                                                                                                                           |                                                                                                                                                                                                                                                                                                                                                                                                                                                                                                                                                                                                                                                                                                                                                                                                     |
|--|--|--|---------------------------------------------------------------------------------------------------------------------------------------------------------------------------------------------------------------------------|-----------------------------------------------------------------------------------------------------------------------------------------------------------------------------------------------------------------------------------------------------------------------------------------------------------------------------------------------------------------------------------------------------------------------------------------------------------------------------------------------------------------------------------------------------------------------------------------------------------------------------------------------------------------------------------------------------------------------------------------------------------------------------------------------------|
|  |  |  | <p>Groups: Treated=0.1407,<br/>Control=<br/>0.1191, Difference=<br/>0.0216, T statistic= 2.89,<br/>SE: 0.0074.<br/>Matched with age,<br/>individual consumption<br/>expenditure, HH size,<br/>location and education.</p> | <p>-Age groups of 19 to 60 years [19 to 40 years 1857.13<br/>(-68.3, - 3782.6) and 41 to 60 years 2231.96 (234.3-<br/>4229.6)],<br/>-Using a private hospital for treatment [3772.82<br/>(1004.0-6541.6)],<br/>-Admission in paying ward [Paying General 9095.49<br/>(6978.9-11,212.1), and Paying Special 13,642.31<br/>(9856.4-17,428.3)], and<br/>-Having ailments and injuries (significant)<br/>-Utilization of AYUSH type of treatment had<br/>significant negative effect [- 9020.48 (-16,224.0 - -<br/>1817.0)] on OOP health expenditures compared to<br/>individuals using allopathic treatment.<br/>-Factors such as location, social group, HH type, HH<br/>size, and number of hospital beds in states had no<br/>statistically significant effect on OOP health<br/>expenditures.</p> |
|--|--|--|---------------------------------------------------------------------------------------------------------------------------------------------------------------------------------------------------------------------------|-----------------------------------------------------------------------------------------------------------------------------------------------------------------------------------------------------------------------------------------------------------------------------------------------------------------------------------------------------------------------------------------------------------------------------------------------------------------------------------------------------------------------------------------------------------------------------------------------------------------------------------------------------------------------------------------------------------------------------------------------------------------------------------------------------|



|                                             |                                                                                   |                                                                                                                                                                                                                                                                                                                              |                                     |                                                                                                                                                                                                                                                                                                                                                                                            |
|---------------------------------------------|-----------------------------------------------------------------------------------|------------------------------------------------------------------------------------------------------------------------------------------------------------------------------------------------------------------------------------------------------------------------------------------------------------------------------|-------------------------------------|--------------------------------------------------------------------------------------------------------------------------------------------------------------------------------------------------------------------------------------------------------------------------------------------------------------------------------------------------------------------------------------------|
|                                             |                                                                                   |                                                                                                                                                                                                                                                                                                                              |                                     | -Gujarat and Kerala states show significantly lower OOP expenses, keeping all other factors constant, than other states of India in the state fixed effects model.                                                                                                                                                                                                                         |
| <b>Willingness to pay</b>                   |                                                                                   |                                                                                                                                                                                                                                                                                                                              |                                     |                                                                                                                                                                                                                                                                                                                                                                                            |
| <b>Vellakkal, Juyal, &amp; Mehedi, 2014</b> | Cross sectional study; contingent valuation method, applied a bidding game method | n=1846, Mean Age: 54.55 (12.23)<br>Proportion of CGHS beneficiary in the sample: 65% and remaining were ECHS beneficiary<br>additional monthly financial contribution towards the scheme<br>beneficiaries was willing to pay for better quality of healthcare services”<br>WTP Version 1: WTP base amount is INR 100 and the | PFHI covered: CGHS and ECHS schemes | -WTP for better quality healthcare under the schemes<br>-Among willing people: how much per month would pay in addition to their current contribution<br>-About 71% of CGHS beneficiaries, 28% of ECHS beneficiaries were willing to pay additionally every month for health insurance schemes.<br>-The amount of WTP by CGHS beneficiaries was 64% higher than their current contribution |

|                                                                                                                                                                                                                                                                                                                                                                                                                                                                                                                                                                                                                                                                                                                                                                                                                                                                                                                                                                                                          |  |                                                                                                                                                                                                                                                                               |  |  |
|----------------------------------------------------------------------------------------------------------------------------------------------------------------------------------------------------------------------------------------------------------------------------------------------------------------------------------------------------------------------------------------------------------------------------------------------------------------------------------------------------------------------------------------------------------------------------------------------------------------------------------------------------------------------------------------------------------------------------------------------------------------------------------------------------------------------------------------------------------------------------------------------------------------------------------------------------------------------------------------------------------|--|-------------------------------------------------------------------------------------------------------------------------------------------------------------------------------------------------------------------------------------------------------------------------------|--|--|
|                                                                                                                                                                                                                                                                                                                                                                                                                                                                                                                                                                                                                                                                                                                                                                                                                                                                                                                                                                                                          |  | <p>bid amount was INR 10<br/>(10% of the base amount).</p> <p>WTP Version 2: WTP base amount was INR 150 and the bid amount was INR 15 (10% of the base amount).</p> <p>WTP Version 3: WTP base amount is INR 200 and the bid amount was INR 20 (10% of the base amount).</p> |  |  |
| <p>AOR: Adjusted Odds Ratio; AP: Andhra Pradesh; ATT: Average Treatment on Treated; BPL: Below Poverty Line; CGHS; Central Government Health Scheme; CHE: Catastrophic Health Expenditure; CHIS: Comprehensive Health Insurance Scheme; CI: Confidence Interval; DID; Difference-in-Differences; ECHS: Ex-serviceman Contributory Health Scheme; ESIS: Employee State Insurance Scheme; HHS: Households; INR: Indian National Rupee; IP: In-Patient; IV: Instrumental Variable; MSBY: Mukhyamantri Swasthya Bima Yojana; NA: Not Applicable; NSSO: National Sample Survey Office; OLS: Ordinary Least Square; OOP: Out of pocket payment; OOPE: Out Of Pocket Expenditure; OR: Odds Ratio; PMJAY: Pradhan Mantri Jan Arogya Yojana; PSM: Propensity Score Matching; RAS: Rajiv Arogya Shree; RSBY: Rashtriya Swasthya Bima Yojana; SC: Scheduled Castes; SE: Standard Error; SHG: Self Help Groups; UMPCE: Usual Monthly Per Capita Expenditure; VAS: Vajpayee Arogya Shree; WTP: Willingness to Pay</p> |  |                                                                                                                                                                                                                                                                               |  |  |

1  
2  
3  
4  
5  
6  
7  
8  
9  
10  
11  
12  
13  
14  
15  
16  
17  
18  
19  
20  
21  
22  
23  
24  
25  
26  
27  
28  
29  
30  
31  
32  
33  
34  
35  
36  
37  
38  
39  
40  
41  
42  
43  
44  
45  
46  
47

For peer review only

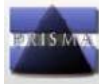

# PRISMA 2009 Checklist

| Section/topic                      | #  | Checklist item                                                                                                                                                                                                                                                                                              | Reported on page # |
|------------------------------------|----|-------------------------------------------------------------------------------------------------------------------------------------------------------------------------------------------------------------------------------------------------------------------------------------------------------------|--------------------|
| <b>TITLE</b>                       |    |                                                                                                                                                                                                                                                                                                             |                    |
| Title                              | 1  | Identify the report as a systematic review, meta-analysis, or both.                                                                                                                                                                                                                                         | 1                  |
| <b>ABSTRACT</b>                    |    |                                                                                                                                                                                                                                                                                                             |                    |
| Structured summary                 | 2  | Provide a structured summary including, as applicable: background; objectives; data sources; study eligibility criteria, participants, and interventions; study appraisal and synthesis methods; results; limitations; conclusions and implications of key findings; systematic review registration number. | 2-3                |
| <b>INTRODUCTION</b>                |    |                                                                                                                                                                                                                                                                                                             |                    |
| Rationale                          | 3  | Describe the rationale for the review in the context of what is already known.                                                                                                                                                                                                                              | 6                  |
| Objectives                         | 4  | Provide an explicit statement of questions being addressed with reference to participants, interventions, comparisons, outcomes, and study design (PICOS).                                                                                                                                                  | 6                  |
| <b>METHODS</b>                     |    |                                                                                                                                                                                                                                                                                                             |                    |
| Protocol and registration          | 5  | Indicate if a review protocol exists, if and where it can be accessed (e.g., Web address), and, if available, provide registration information including registration number.                                                                                                                               | -                  |
| Eligibility criteria               | 6  | Specify study characteristics (e.g., PICOS, length of follow-up) and report characteristics (e.g., years considered, language, publication status) used as criteria for eligibility, giving rationale.                                                                                                      | 7                  |
| Information sources                | 7  | Describe all information sources (e.g., databases with dates of coverage, contact with study authors to identify additional studies) in the search and date last searched.                                                                                                                                  | 7-8                |
| Search                             | 8  | Present full electronic search strategy for at least one database, including any limits used, such that it could be repeated.                                                                                                                                                                               | 7-8                |
| Study selection                    | 9  | State the process for selecting studies (i.e., screening, eligibility, included in systematic review, and, if applicable, included in the meta-analysis).                                                                                                                                                   | 8                  |
| Data collection process            | 10 | Describe method of data extraction from reports (e.g., piloted forms, independently, in duplicate) and any processes for obtaining and confirming data from investigators.                                                                                                                                  | 8                  |
| Data items                         | 11 | List and define all variables for which data were sought (e.g., PICOS, funding sources) and any assumptions and simplifications made.                                                                                                                                                                       | 8-9                |
| Risk of bias in individual studies | 12 | Describe methods used for assessing risk of bias of individual studies (including specification of whether this was done at the study or outcome level), and how this information is to be used in any data synthesis.                                                                                      | 9                  |
| Summary measures                   | 13 | State the principal summary measures (e.g., risk ratio, difference in means).                                                                                                                                                                                                                               | 10                 |
| Synthesis of results               | 14 | Describe the methods of handling data and combining results of studies, if done, including measures of consistency (e.g., $I^2$ ) for each meta-analysis.                                                                                                                                                   | 10                 |

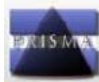

# PRISMA 2009 Checklist

Page 1 of 2

| Section/topic                 | #  | Checklist item                                                                                                                                                                                           | Reported on page # |
|-------------------------------|----|----------------------------------------------------------------------------------------------------------------------------------------------------------------------------------------------------------|--------------------|
| Risk of bias across studies   | 15 | Specify any assessment of risk of bias that may affect the cumulative evidence (e.g., publication bias, selective reporting within studies).                                                             | -                  |
| Additional analyses           | 16 | Describe methods of additional analyses (e.g., sensitivity or subgroup analyses, meta-regression), if done, indicating which were pre-specified.                                                         | -                  |
| <b>RESULTS</b>                |    |                                                                                                                                                                                                          |                    |
| Study selection               | 17 | Give numbers of studies screened, assessed for eligibility, and included in the review, with reasons for exclusions at each stage, ideally with a flow diagram.                                          | 10                 |
| Study characteristics         | 18 | For each study, present characteristics for which data were extracted (e.g., study size, PICOS, follow-up period) and provide the citations.                                                             | 10, 26-28          |
| Risk of bias within studies   | 19 | Present data on risk of bias of each study and, if available, any outcome level assessment (see item 12).                                                                                                | 10-12              |
| Results of individual studies | 20 | For all outcomes considered (benefits or harms), present, for each study: (a) simple summary data for each intervention group (b) effect estimates and confidence intervals, ideally with a forest plot. | 10-13, 33-46       |
| Synthesis of results          | 21 | Present results of each meta-analysis done, including confidence intervals and measures of consistency.                                                                                                  | -                  |
| Risk of bias across studies   | 22 | Present results of any assessment of risk of bias across studies (see Item 15).                                                                                                                          | -                  |
| Additional analysis           | 23 | Give results of additional analyses, if done (e.g., sensitivity or subgroup analyses, meta-regression [see Item 16]).                                                                                    | -                  |
| <b>DISCUSSION</b>             |    |                                                                                                                                                                                                          |                    |
| Summary of evidence           | 24 | Summarize the main findings including the strength of evidence for each main outcome; consider their relevance to key groups (e.g., healthcare providers, users, and policy makers).                     | 13-16              |
| Limitations                   | 25 | Discuss limitations at study and outcome level (e.g., risk of bias), and at review-level (e.g., incomplete retrieval of identified research, reporting bias).                                            | 16                 |
| Conclusions                   | 26 | Provide a general interpretation of the results in the context of other evidence, and implications for future research.                                                                                  | 17                 |
| <b>FUNDING</b>                |    |                                                                                                                                                                                                          |                    |
| Funding                       | 27 | Describe sources of funding for the systematic review and other support (e.g., supply of data); role of funders for the systematic review.                                                               | 19                 |

From: Moher D, Liberati A, Tetzlaff J, Altman DG, The PRISMA Group (2009). Preferred Reporting Items for Systematic Reviews and Meta-Analyses: The PRISMA Statement. PLoS Med 6(6): e1000097. doi:10.1371/journal.pmed1000097

For more information, visit: [www.prisma-statement.org](http://www.prisma-statement.org).

Page 2 of 2  
For peer review only - <http://bmjopen.bmj.com/site/about/guidelines.xhtml>
